# Supplementary material for: Belgian population norms for the EQ-5D-5L, 2018
Source: Qual Life Res. 2021 Aug 18;31(2):527–37. doi: 10.1007/s11136-021-02971-6 (PMC8847192; doi:10.1007/s11136-021-02971-6)
Supplement: Supplementary file 1 — Supplementary file1 (XLSX 392 kb) [file 11136_2021_2971_MOESM1_ESM.xlsx]

## Sheet: MO
EQ-5D-5L population norms for the Belgian population aged 15 years and older in 2013, by age, sex, and region.
	BELGIUM									BRUSSELS									FLANDERS									WALLONIA
	Both			Male			Female			Both			Male			Female			Both			Male			Female			Both			Male			Female
Age	mean	lwr	upr	mean	lwr	upr	mean	lwr	upr	mean	lwr	upr	mean	lwr	upr	mean	lwr	upr	mean	lwr	upr	mean	lwr	upr	mean	lwr	upr	mean	lwr	upr	mean	lwr	upr	mean	lwr	upr
ALL	0.179661	0.16657	0.193543	0.154443	0.138075	0.172362	0.202973	0.184366	0.222945	0.170602	0.143888	0.201112	0.166557	0.127102	0.215239	0.174274	0.140902	0.213586	0.177357	0.159153	0.197154	0.143477	0.121317	0.168906	0.208939	0.182461	0.238141	0.186591	0.166619	0.208359	0.17348	0.148208	0.20204	0.198565	0.172238	0.227808
15	0.0632809	0.03146	0.123194	0.0528848	0.0258211	0.10525	0.0741628	0.0366969	0.144156	0.0582434	0.0269022	0.121537	0.0549082	0.024828	0.117057	0.0609762	0.0267601	0.132965	0.0639659	0.0313734	0.126012	0.0497679	0.0237071	0.101499	0.0791431	0.0386521	0.155203	0.0625466	0.0306178	0.123528	0.0578982	0.0279334	0.116166	0.0675742	0.0324544	0.13538
16	0.0613581	0.03319	0.110695	0.0512093	0.0272159	0.0943046	0.0718601	0.0386617	0.129719	0.05651	0.0282716	0.109767	0.0531848	0.0260859	0.105388	0.0590707	0.0279087	0.120707	0.0620734	0.0330505	0.113588	0.0481976	0.024906	0.0912333	0.0767162	0.0406298	0.140171	0.0606934	0.0322652	0.111289	0.0560866	0.0293883	0.10443	0.0654769	0.0340999	0.122076
17	0.0595381	0.0348448	0.0999192	0.0496349	0.0285467	0.0849395	0.0696683	0.0405219	0.117218	0.0548693	0.0295452	0.0996703	0.0515653	0.027267	0.095393	0.0572584	0.0289122	0.110241	0.0602815	0.0346276	0.102915	0.0467225	0.0260164	0.0825122	0.0744054	0.0424635	0.127183	0.0589388	0.033819	0.100771	0.0543838	0.0307537	0.0944018	0.0634813	0.0356191	0.110638
18	0.0578626	0.0363356	0.0909395	0.0482052	0.029747	0.0772053	0.0676256	0.0421683	0.106739	0.0533596	0.0306545	0.0912979	0.050095	0.0283186	0.0871157	0.0555711	0.0297052	0.101601	0.0586321	0.0360132	0.094071	0.0453838	0.0269755	0.0753808	0.0722514	0.0440359	0.116345	0.0573239	0.0351907	0.0920498	0.0528377	0.031957	0.0861477	0.0616225	0.036915	0.101131
19	0.0563685	0.0375442	0.083809	0.0469589	0.0307287	0.0711324	0.0657659	0.0434608	0.0983414	0.052015	0.0315226	0.0846646	0.0488147	0.0291811	0.0805619	0.0540366	0.0302272	0.0947673	0.0571627	0.0370934	0.0871081	0.0442182	0.0277095	0.0698557	0.0702906	0.045208	0.10772	0.0558854	0.0362697	0.0851723	0.051491	0.032908	0.0797029	0.0599315	0.0378751	0.0935832
20	0.0550895	0.038337	0.0785645	0.0459317	0.0313946	0.0667363	0.0641195	0.0442481	0.0920554	0.0508668	0.0320809	0.079747	0.0477613	0.0298	0.0757037	0.05268	0.0304408	0.0896641	0.0559075	0.037754	0.0820458	0.0432595	0.0281517	0.065925	0.0685556	0.0458466	0.101319	0.0546566	0.0369432	0.0801565	0.0503829	0.0335183	0.0750736	0.0584362	0.0383955	0.08798
21	0.0540574	0.0386155	0.0751915	0.0451574	0.031678	0.0639933	0.0627144	0.0444243	0.0878425	0.0499444	0.0322986	0.0764688	0.0469704	0.0301502	0.0724729	0.0515245	0.0303508	0.0861571	0.054899	0.0379298	0.0788377	0.0425398	0.028276	0.0635285	0.0670765	0.0458828	0.097064	0.0536694	0.0371442	0.0769589	0.0495509	0.0337421	0.0722127	0.057162	0.0384268	0.0842315
22	0.0533035	0.0383942	0.0735595	0.0446704	0.0316006	0.0627952	0.0615773	0.0440101	0.0855292	0.0492767	0.0322122	0.0746837	0.046478	0.0302625	0.0707483	0.050592	0.0300149	0.0840536	0.0541688	0.0376637	0.0773258	0.0420918	0.0281306	0.0625361	0.0658821	0.0453733	0.0947409	0.0529547	0.0369098	0.0754281	0.0490328	0.0336234	0.0709855	0.0561335	0.0380192	0.0821415
23	0.0528601	0.0378346	0.0733975	0.0445078	0.0312956	0.0629355	0.0607349	0.043184	0.0847869	0.0488941	0.0319306	0.0741791	0.0463231	0.0302323	0.0703566	0.0499046	0.0295344	0.0831212	0.0537504	0.0371176	0.0772388	0.0419508	0.0278378	0.0627569	0.0650012	0.044507	0.094004	0.0525451	0.0363956	0.0753006	0.0488698	0.033306	0.0711711	0.0553752	0.0373259	0.0814143
24	0.0527631	0.0371859	0.0743616	0.0447122	0.0309635	0.0641615	0.0602155	0.0422158	0.0852071	0.04883	0.031608	0.0747115	0.0465502	0.0302017	0.0710994	0.0494858	0.0290312	0.0831186	0.0536803	0.0365161	0.078257	0.0421575	0.027558	0.0639825	0.0644643	0.0435393	0.0944528	0.0524764	0.0358215	0.0762625	0.0491088	0.0329883	0.0725161	0.0549132	0.0365528	0.0817136
25	0.0530539	0.0366929	0.0761334	0.045335	0.030806	0.066248	0.0600504	0.0413686	0.0864085	0.0491228	0.0314055	0.0760506	0.0472133	0.0303286	0.0727925	0.0493617	0.0286246	0.0838254	0.0540006	0.0360772	0.0800886	0.0427608	0.0274486	0.066035	0.0643052	0.042714	0.095719	0.05279	0.0354028	0.0780256	0.0498064	0.0328684	0.0747978	0.0547762	0.0358985	0.0827292
26	0.0537823	0.0365534	0.0784702	0.0464406	0.0309942	0.0690365	0.0602761	0.0408491	0.0880936	0.0498191	0.0314687	0.0780084	0.0483796	0.0307657	0.0752944	0.0495628	0.0284186	0.0850617	0.054762	0.0359805	0.0825083	0.0438222	0.0276468	0.0687919	0.064563	0.0422265	0.0975119	0.0535353	0.0353183	0.0803659	0.0510334	0.0331184	0.077859	0.0549981	0.0355249	0.0842136
27	0.0550099	0.0369244	0.0812067	0.0481112	0.0316737	0.0724409	0.0609362	0.04081	0.0900561	0.0509763	0.0319258	0.0804496	0.0501355	0.0316592	0.0785202	0.0501258	0.0285	0.086697	0.0560272	0.0363734	0.0853599	0.0454206	0.0282747	0.0721912	0.0652847	0.0422258	0.0996261	0.0547738	0.0357142	0.083128	0.0528802	0.0338897	0.0816132	0.0556193	0.0355579	0.08599
28	0.0568145	0.037947	0.0842418	0.0504541	0.0329857	0.0764421	0.0620843	0.0413712	0.0921708	0.0526666	0.0328974	0.0832925	0.052593	0.0331585	0.0824468	0.051096	0.0289431	0.0886565	0.0578748	0.0373908	0.0885484	0.0476585	0.0294536	0.076232	0.0665277	0.0428319	0.101937	0.0565825	0.0367249	0.0862164	0.0554644	0.0353328	0.0860431	0.0566894	0.0361005	0.087949
29	0.0592954	0.0397711	0.0875308	0.0536104	0.0350874	0.0810901	0.0637872	0.0426389	0.0943905	0.0549824	0.0345099	0.0865117	0.0558995	0.0354319	0.0871227	0.0525297	0.029814	0.0909306	0.060405	0.0391757	0.0920366	0.0506715	0.0313197	0.0809808	0.0683632	0.0441525	0.1044	0.0590598	0.0384929	0.0895918	0.0589402	0.0376171	0.0912047	0.0582704	0.0372464	0.0900516
30	0.0625803	0.042574	0.0910933	0.0577673	0.0381678	0.0865259	0.0661285	0.0447123	0.0967637	0.0580426	0.0369049	0.090154	0.0602506	0.0386785	0.0926938	0.0544983	0.0311714	0.0935954	0.0637467	0.0418951	0.0958552	0.0546391	0.0340361	0.0865956	0.0708809	0.0462879	0.107073	0.062332	0.0411847	0.0932815	0.063512	0.0409469	0.0972513	0.0604405	0.0390833	0.0923466
31	0.0667898	0.0465096	0.0950316	0.0631166	0.0423911	0.0929911	0.0691819	0.0476231	0.0994809	0.0619597	0.0401947	0.0943516	0.0658459	0.0430717	0.0994111	0.0570651	0.0330315	0.0968343	0.0680209	0.0456898	0.100121	0.0597465	0.0377451	0.0933284	0.0741587	0.049271	0.110161	0.0665181	0.0449417	0.0973968	0.0693879	0.0455021	0.10444	0.0632684	0.0416433	0.09501
32	0.071889	0.0514953	0.0995118	0.069658	0.0476736	0.100708	0.0729059	0.0511642	0.102885	0.0667019	0.0442941	0.0992683	0.0726841	0.0485331	0.107495	0.0601972	0.0352771	0.100881	0.0731909	0.0504739	0.105002	0.065996	0.0423803	0.101378	0.0781513	0.0528983	0.114009	0.0715826	0.0496817	0.102101	0.0765638	0.0512017	0.112993	0.0667169	0.0447589	0.0983381
33	0.0777743	0.0572897	0.104769	0.0772898	0.0537694	0.109904	0.0772173	0.0550067	0.107377	0.0721741	0.0489967	0.105104	0.0806571	0.054815	0.117172	0.063827	0.037739	0.105963	0.0791502	0.056018	0.110714	0.0732933	0.0477468	0.110916	0.0827683	0.0568527	0.119007	0.077422	0.0551781	0.107612	0.0849234	0.0577946	0.123122	0.0707102	0.0481655	0.102669
34	0.0842942	0.0635091	0.111075	0.0858216	0.0603147	0.12073	0.082012	0.0587941	0.113295	0.078236	0.0540091	0.112043	0.0895636	0.0615438	0.128592	0.0678684	0.0402465	0.112231	0.0857439	0.0619755	0.117486	0.0814587	0.0535588	0.122019	0.0878964	0.0607932	0.125469	0.0838847	0.0610845	0.114161	0.0942526	0.0649031	0.134959	0.0751524	0.0515749	0.108278
35	0.0912314	0.0696781	0.118602	0.0949413	0.0668933	0.133073	0.0871548	0.0622587	0.120725	0.084686	0.0589962	0.120134	0.0990746	0.0682838	0.141639	0.0722089	0.0426656	0.119652	0.0927505	0.067929	0.125422	0.0901944	0.0594797	0.134501	0.0933895	0.0644552	0.13346	0.0907546	0.06698	0.121866	0.104205	0.0720825	0.148353	0.0799189	0.0547597	0.115228
36	0.0982909	0.0753822	0.127204	0.104191	0.0731399	0.146344	0.0924738	0.0653223	0.129349	0.0912497	0.0636672	0.129134	0.10871	0.0746403	0.155715	0.0767037	0.0449308	0.127935	0.0998711	0.0735065	0.134321	0.0990614	0.0651886	0.147753	0.099062	0.0677399	0.142651	0.0977385	0.07249	0.130543	0.114276	0.0789228	0.162669	0.0848497	0.0576307	0.123243
37	0.105096	0.0804114	0.136236	0.112965	0.0787991	0.159382	0.0977556	0.0680899	0.138426	0.0975759	0.0678422	0.138406	0.117836	0.0803221	0.169639	0.0811715	0.0470498	0.136495	0.106725	0.0784891	0.143536	0.107475	0.0704255	0.160647	0.104684	0.0707192	0.152289	0.104463	0.0773987	0.139559	0.123804	0.0851169	0.17668	0.0897458	0.0602451	0.131669
38	0.111196	0.0847588	0.144577	0.120527	0.083708	0.170526	0.102746	0.0707647	0.146896	0.103243	0.0714494	0.146944	0.125685	0.0851267	0.181729	0.0853948	0.0490821	0.144491	0.112856	0.0828177	0.151985	0.114723	0.0749913	0.171601	0.109985	0.073567	0.161291	0.11048	0.0816552	0.147843	0.131991	0.090452	0.18865	0.0943694	0.0627505	0.139548
39	0.116085	0.088503	0.15084	0.126064	0.0877358	0.177872	0.107156	0.0735647	0.153542	0.107777	0.0744628	0.153523	0.131413	0.0888778	0.190058	0.0891241	0.051103	0.150934	0.117757	0.0865088	0.158337	0.12002	0.078711	0.178802	0.114653	0.0764786	0.168408	0.115292	0.0852862	0.154075	0.137961	0.0947516	0.196596	0.0984485	0.0653167	0.145766
40	0.119361	0.091707	0.15394	0.128951	0.0907773	0.18	0.110748	0.0766527	0.157424	0.110813	0.0768694	0.157193	0.134384	0.0914336	0.19322	0.0921647	0.0531771	0.155056	0.12102	0.0895767	0.161543	0.122754	0.0814425	0.180893	0.118435	0.0795958	0.172671	0.118507	0.0883218	0.157228	0.14105	0.0978785	0.199062	0.101767	0.0680774	0.149455
41	0.121155	0.0944055	0.154193	0.1294	0.0928854	0.177462	0.113608	0.0800546	0.158797	0.112529	0.0787623	0.158285	0.13489	0.0928942	0.191855	0.0946343	0.0553699	0.157111	0.122755	0.092045	0.161884	0.123102	0.083221	0.178377	0.121397	0.082929	0.174317	0.12029	0.0908276	0.157651	0.141533	0.0999184	0.196692	0.104431	0.0710818	0.150885
42	0.12179	0.0965213	0.152558	0.127941	0.0940964	0.171653	0.115931	0.083682	0.15846	0.113295	0.0802189	0.157672	0.133558	0.093384	0.187441	0.0967609	0.0577172	0.157794	0.12326	0.093855	0.160248	0.121551	0.0840902	0.172555	0.123718	0.086375	0.174128	0.121003	0.0927931	0.15631	0.140029	0.100959	0.191006	0.106659	0.0742915	0.150831
43	0.121633	0.0978886	0.150179	0.125169	0.094394	0.164159	0.117941	0.0873613	0.157379	0.11352	0.0813044	0.156329	0.131076	0.0930155	0.181592	0.0988	0.0602393	0.157897	0.122878	0.094895	0.157675	0.118651	0.0840728	0.16489	0.125605	0.089756	0.17305	0.121049	0.0941492	0.154325	0.137222	0.101049	0.183697	0.108698	0.0776053	0.150219
44	0.121067	0.0983531	0.148166	0.121686	0.0937534	0.156503	0.11988	0.0908646	0.156564	0.113628	0.0821291	0.155165	0.128128	0.091945	0.175795	0.101029	0.0629733	0.1582	0.12197	0.0950911	0.155144	0.114965	0.0832119	0.156764	0.127282	0.0928666	0.172033	0.120847	0.0948573	0.152755	0.133796	0.100254	0.17636	0.110815	0.0808938	0.149998
45	0.120476	0.0979528	0.147333	0.118061	0.0922381	0.149918	0.122004	0.093997	0.15691	0.114046	0.0829054	0.154907	0.125363	0.0904429	0.171227	0.103748	0.0660103	0.159379	0.120896	0.0945292	0.153373	0.111026	0.0816344	0.149279	0.128988	0.0955599	0.171887	0.120816	0.0950388	0.152407	0.130397	0.0987516	0.170268	0.113296	0.0840725	0.151004
46	0.120239	0.0970724	0.148027	0.114811	0.0901398	0.145157	0.124588	0.0967512	0.159024	0.115209	0.0839863	0.156061	0.12338	0.0889415	0.168684	0.10729	0.0695392	0.161967	0.12001	0.0935427	0.152705	0.107312	0.0796191	0.143138	0.130971	0.0978661	0.173126	0.121377	0.0950771	0.153717	0.127622	0.0969435	0.166221	0.116451	0.087213	0.15384
47	0.120732	0.0963985	0.150188	0.112408	0.0880463	0.142457	0.127928	0.0994452	0.163091	0.117576	0.0858719	0.15895	0.122756	0.0880258	0.168655	0.112034	0.0738871	0.166337	0.119656	0.092685	0.15315	0.104249	0.0776205	0.138641	0.133495	0.100077	0.175891	0.122963	0.0956017	0.156798	0.126025	0.0954803	0.164563	0.120625	0.0906415	0.158796
48	0.12235	0.0967365	0.153591	0.111296	0.0867456	0.141717	0.132352	0.102717	0.168927	0.121664	0.0891951	0.163826	0.124087	0.0883745	0.171515	0.118434	0.0795537	0.17275	0.120178	0.0926153	0.154546	0.102226	0.0762163	0.135808	0.136843	0.102732	0.180009	0.126042	0.0973904	0.161614	0.126157	0.0951857	0.165365	0.126217	0.0949536	0.165888
49	0.125521	0.0989039	0.158046	0.111933	0.087079	0.142772	0.138241	0.107411	0.176173	0.128095	0.094715	0.171018	0.128055	0.0907117	0.177765	0.127059	0.0872388	0.181441	0.12194	0.0940085	0.156735	0.10162	0.0760243	0.134577	0.141331	0.106519	0.185161	0.131159	0.10131	0.168155	0.128621	0.0969695	0.168674	0.133709	0.100963	0.175007
50	0.130625	0.103567	0.163463	0.114697	0.0897155	0.145522	0.145936	0.114312	0.184486	0.137485	0.103098	0.181026	0.13531	0.0955865	0.188109	0.138481	0.0976754	0.192693	0.125243	0.0973728	0.159679	0.102719	0.0775112	0.134925	0.147227	0.112035	0.191095	0.13882	0.108135	0.17649	0.133951	0.101606	0.174592	0.143559	0.109474	0.18604
51	0.137587	0.110674	0.169796	0.119463	0.0945874	0.149797	0.155384	0.123505	0.193674	0.149854	0.114114	0.194333	0.145813	0.102703	0.202928	0.15276	0.110896	0.206752	0.130009	0.102532	0.163508	0.105396	0.0805243	0.136807	0.154475	0.119208	0.197831	0.148988	0.11785	0.186613	0.142044	0.10903	0.183001	0.15576	0.120588	0.198871
52	0.146212	0.119883	0.177159	0.126002	0.101362	0.155596	0.166398	0.134706	0.20379	0.165016	0.127015	0.21163	0.159334	0.111481	0.222581	0.169729	0.126398	0.224105	0.136066	0.109008	0.16857	0.109449	0.0846761	0.140359	0.162913	0.127605	0.205688	0.161449	0.130073	0.198665	0.152639	0.118855	0.193914	0.170116	0.133997	0.21357
53	0.156265	0.130641	0.18584	0.134082	0.109561	0.163085	0.178727	0.14736	0.215087	0.182654	0.140774	0.233605	0.175553	0.12131	0.247227	0.189062	0.143214	0.245383	0.14323	0.116149	0.175373	0.114687	0.0894906	0.14584	0.17235	0.136587	0.215143	0.175907	0.144126	0.212952	0.165432	0.130504	0.207479	0.18632	0.149077	0.230349
54	0.167446	0.142133	0.196235	0.143418	0.118544	0.17249	0.192038	0.160637	0.227909	0.202249	0.154402	0.260356	0.193971	0.13163	0.276437	0.210203	0.160108	0.270915	0.151283	0.123229	0.184382	0.120902	0.094478	0.153464	0.182548	0.145434	0.226622	0.191931	0.159022	0.229789	0.180005	0.143204	0.223794	0.203915	0.164915	0.249384
55	0.179363	0.153408	0.208627	0.153648	0.127607	0.183884	0.205898	0.173593	0.24245	0.223028	0.167271	0.290878	0.213832	0.141997	0.308922	0.232336	0.176029	0.300093	0.159961	0.129708	0.195684	0.127851	0.0992772	0.163159	0.193214	0.153584	0.240169	0.208917	0.173681	0.249147	0.195773	0.156111	0.242615	0.222265	0.180503	0.2705
56	0.19152	0.163736	0.222762	0.164303	0.136197	0.196887	0.219772	0.185486	0.258385	0.243948	0.179118	0.32301	0.234095	0.152067	0.342498	0.25438	0.190408	0.331056	0.16894	0.135442	0.208721	0.135232	0.103753	0.174403	0.203997	0.160838	0.255215	0.226075	0.187286	0.270227	0.211956	0.168505	0.263066	0.240556	0.195031	0.292841
57	0.203313	0.172869	0.237579	0.174798	0.144048	0.210497	0.233028	0.196009	0.27465	0.263728	0.189845	0.353807	0.253445	0.161537	0.374301	0.275036	0.203059	0.360969	0.177832	0.140623	0.22234	0.142679	0.107962	0.186229	0.214486	0.167342	0.270595	0.242435	0.199427	0.291344	0.227574	0.179879	0.283543	0.257814	0.208022	0.314786
58	0.214048	0.180912	0.25139	0.184438	0.151096	0.223203	0.244956	0.20521	0.289596	0.28091	0.199343	0.380011	0.270357	0.170092	0.401158	0.292857	0.213919	0.386599	0.186192	0.145567	0.235036	0.149755	0.11204	0.197343	0.224221	0.173415	0.284782	0.256892	0.209945	0.310216	0.241483	0.189875	0.301892	0.272951	0.21924	0.334189
59	0.223117	0.188092	0.262555	0.192599	0.157382	0.233512	0.254958	0.213301	0.30163	0.294255	0.207523	0.398987	0.283505	0.17747	0.420506	0.30664	0.222982	0.405312	0.193629	0.150577	0.245435	0.156066	0.116133	0.206523	0.232811	0.179393	0.296391	0.268494	0.218814	0.324764	0.252675	0.198274	0.316117	0.285053	0.228621	0.349111
60	0.230541	0.194716	0.270741	0.199268	0.16312	0.24112	0.263083	0.220617	0.310469	0.303767	0.214597	0.410617	0.292851	0.183799	0.432334	0.316412	0.230548	0.416925	0.200176	0.155876	0.253288	0.161617	0.120395	0.213527	0.240315	0.18554	0.3052	0.277251	0.226325	0.334679	0.261123	0.205286	0.325919	0.294158	0.236456	0.359315
61	0.23656	0.200968	0.276276	0.204651	0.168457	0.246317	0.269609	0.227361	0.316492	0.309901	0.220785	0.415793	0.298831	0.189261	0.437597	0.322653	0.236881	0.422296	0.206003	0.16157	0.258883	0.166546	0.124911	0.21859	0.246936	0.191979	0.311558	0.283521	0.232732	0.340475	0.267159	0.211139	0.331792	0.300647	0.24301	0.365356
62	0.241465	0.206915	0.279749	0.209001	0.173452	0.249636	0.274863	0.233614	0.320352	0.313231	0.22625	0.415686	0.302004	0.194008	0.437486	0.325961	0.242148	0.422607	0.211316	0.167683	0.262718	0.171018	0.1297	0.222139	0.252912	0.198734	0.316035	0.287749	0.238197	0.342969	0.271202	0.215986	0.334512	0.304986	0.248457	0.368076
63	0.245587	0.212547	0.281923	0.212614	0.178108	0.251757	0.279212	0.239375	0.322865	0.314402	0.231122	0.411625	0.303005	0.198177	0.433316	0.327004	0.246461	0.419225	0.216341	0.174179	0.265428	0.175227	0.134739	0.224721	0.258507	0.205761	0.319339	0.290435	0.242826	0.343149	0.27373	0.219944	0.335021	0.307695	0.252921	0.368481
64	0.249279	0.217798	0.28366	0.215809	0.182401	0.253438	0.283048	0.244608	0.324931	0.314095	0.235508	0.405013	0.302505	0.2019	0.426454	0.326483	0.249891	0.413607	0.221328	0.18098	0.26773	0.179381	0.139976	0.22695	0.264004	0.212974	0.322254	0.292112	0.246695	0.342094	0.275255	0.223121	0.334328	0.309329	0.256508	0.367648
65	0.252917	0.222604	0.28584	0.218924	0.186326	0.255434	0.286779	0.249298	0.327438	0.313006	0.239509	0.397275	0.301193	0.205323	0.418267	0.325116	0.252505	0.407232	0.226542	0.187982	0.270378	0.183708	0.145355	0.229464	0.269702	0.220282	0.325581	0.29333	0.249892	0.340887	0.276306	0.225657	0.333428	0.310454	0.259351	0.366642
66	0.256889	0.226996	0.289246	0.222314	0.189965	0.258414	0.290829	0.253554	0.331152	0.311831	0.243245	0.389796	0.299758	0.208624	0.410073	0.323619	0.254421	0.401503	0.232268	0.1951	0.274105	0.188455	0.150847	0.232867	0.27592	0.22764	0.330063	0.294647	0.252586	0.340522	0.277421	0.227775	0.333219	0.311648	0.261677	0.366426
67	0.261602	0.231228	0.294438	0.226349	0.193562	0.262879	0.295634	0.257705	0.336614	0.311262	0.246903	0.383847	0.298879	0.212044	0.403083	0.322703	0.255892	0.397637	0.238811	0.20235	0.279539	0.193885	0.156507	0.237674	0.282991	0.235132	0.336309	0.296629	0.255108	0.341806	0.279145	0.229838	0.334437	0.313492	0.263876	0.367777
68	0.267482	0.235834	0.301701	0.231419	0.197559	0.269137	0.301652	0.262334	0.344114	0.31199	0.25082	0.380502	0.299236	0.215928	0.398356	0.323075	0.257397	0.396563	0.246499	0.209937	0.287115	0.200288	0.162526	0.244264	0.291274	0.243042	0.344718	0.29985	0.258024	0.3453	0.282031	0.232377	0.33763	0.316578	0.26654	0.371255
69	0.27491	0.241494	0.311054	0.237877	0.202497	0.27729	0.309281	0.268127	0.353698	0.314589	0.25545	0.380422	0.301392	0.220678	0.396604	0.325323	0.259574	0.398757	0.255637	0.21826	0.296983	0.207936	0.16922	0.252815	0.301088	0.251818	0.355417	0.304801	0.262017	0.351246	0.286553	0.235988	0.343088	0.321406	0.270343	0.377128
70	0.283989	0.248598	0.322258	0.245825	0.208684	0.287177	0.318617	0.275455	0.365133	0.319151	0.261035	0.38349	0.305436	0.226475	0.39777	0.329537	0.262758	0.403987	0.266331	0.227642	0.308965	0.216934	0.176829	0.263227	0.312527	0.26178	0.368204	0.311581	0.267437	0.359437	0.292807	0.240955	0.350663	0.32807	0.275607	0.38521
71	0.294759	0.25738	0.335117	0.255309	0.216314	0.298654	0.329682	0.28453	0.378211	0.32566	0.267747	0.389439	0.311352	0.233439	0.401645	0.335694	0.267164	0.411922	0.278639	0.23834	0.322862	0.227352	0.185552	0.275384	0.325626	0.273165	0.382854	0.320199	0.274487	0.369644	0.300804	0.247435	0.360175	0.336572	0.282506	0.395284
72	0.307263	0.268007	0.349522	0.266385	0.225543	0.311646	0.3425	0.2955	0.392807	0.334116	0.275752	0.398044	0.319139	0.241686	0.408057	0.343786	0.27297	0.422302	0.292619	0.250572	0.338535	0.239262	0.195565	0.289213	0.340416	0.286163	0.399203	0.330669	0.283314	0.381724	0.310565	0.255555	0.371506	0.346917	0.29117	0.407206
73	0.321543	0.280595	0.365432	0.279111	0.23649	0.326133	0.357093	0.308465	0.408854	0.344524	0.2852	0.409126	0.328806	0.251325	0.416873	0.353812	0.280317	0.43493	0.308329	0.264506	0.3559	0.252744	0.207022	0.304684	0.356923	0.300917	0.417133	0.343014	0.294018	0.395599	0.322117	0.265411	0.384595	0.359117	0.301687	0.42089
74	0.337641	0.295215	0.382851	0.293548	0.249244	0.342138	0.373473	0.323476	0.426328	0.356897	0.296208	0.422555	0.340369	0.262451	0.427996	0.365775	0.289308	0.449664	0.325816	0.280262	0.374917	0.267873	0.220048	0.321803	0.375158	0.317522	0.436563	0.357254	0.306659	0.411245	0.335489	0.277068	0.399422	0.37318	0.314107	0.436296
75	0.355582	0.311889	0.401821	0.30975	0.26386	0.359722	0.391641	0.340535	0.445239	0.371243	0.308857	0.438241	0.353844	0.275136	0.44136	0.379677	0.300014	0.466399	0.345114	0.297908	0.395586	0.284722	0.234739	0.340611	0.395113	0.336012	0.457448	0.373401	0.321248	0.428674	0.350707	0.290562	0.416002	0.389107	0.328437	0.453417
76	0.375378	0.330577	0.42242	0.327764	0.280347	0.378978	0.411578	0.359581	0.465627	0.387566	0.323187	0.456127	0.369246	0.289427	0.456922	0.395515	0.312473	0.485056	0.366236	0.317444	0.417936	0.303352	0.251148	0.361173	0.416758	0.356361	0.47976	0.391458	0.337751	0.447929	0.367789	0.30589	0.434375	0.406886	0.344643	0.47227
77	0.397016	0.351165	0.44475	0.347619	0.298657	0.400029	0.433238	0.380482	0.487552	0.405854	0.339194	0.476174	0.386575	0.305335	0.47466	0.413268	0.326691	0.505563	0.389168	0.338799	0.442018	0.323807	0.269284	0.383575	0.44003	0.37847	0.503492	0.411404	0.356074	0.46907	0.386734	0.323002	0.454596	0.426487	0.362636	0.492886
78	0.42045	0.373453	0.468935	0.369321	0.318675	0.423017	0.456544	0.403021	0.51109	0.426072	0.356827	0.498343	0.405815	0.322832	0.494551	0.4329	0.342641	0.527844	0.413858	0.361823	0.46789	0.346108	0.289094	0.407915	0.464833	0.40216	0.528636	0.433195	0.376064	0.492159	0.407522	0.341801	0.476727	0.447851	0.382273	0.515295
79	0.445598	0.397157	0.495094	0.392845	0.340213	0.448089	0.481384	0.426903	0.536311	0.448158	0.375988	0.52258	0.426928	0.341844	0.516568	0.454345	0.36026	0.551807	0.440216	0.38628	0.495602	0.370243	0.310464	0.434284	0.49103	0.427178	0.555176	0.456749	0.39751	0.517236	0.430102	0.362132	0.500813	0.47089	0.403357	0.539506
80	0.472331	0.421928	0.523304	0.418129	0.363017	0.475364	0.507602	0.451767	0.563248	0.472013	0.396539	0.548789	0.449841	0.362254	0.540652	0.477503	0.379449	0.577321	0.468105	0.411875	0.525156	0.396163	0.333217	0.462746	0.518444	0.453203	0.583062	0.481946	0.420159	0.544291	0.454388	0.383794	0.526864	0.495477	0.425644	0.565486
81	0.500476	0.447397	0.553544	0.445067	0.386798	0.504887	0.535005	0.477227	0.591858	0.497496	0.418309	0.57681	0.474443	0.383905	0.566693	0.502236	0.400073	0.604213	0.497335	0.438269	0.556475	0.42377	0.357131	0.493302	0.546856	0.479876	0.61218	0.508624	0.443731	0.573227	0.480252	0.40655	0.554824	0.521445	0.448863	0.593132
82	0.529809	0.47322	0.585641	0.473504	0.411261	0.536582	0.563354	0.502914	0.621969	0.524421	0.441102	0.606402	0.500581	0.406611	0.594511	0.528367	0.421966	0.632251	0.52767	0.465129	0.589354	0.45292	0.381954	0.525852	0.576008	0.506834	0.642327	0.53657	0.467953	0.603829	0.507522	0.430146	0.58454	0.548585	0.472737	0.622241
83	0.560059	0.499119	0.619241	0.503233	0.436142	0.570208	0.592377	0.528521	0.653259	0.552552	0.464713	0.637229	0.528057	0.430169	0.623835	0.555671	0.444935	0.66114	0.558826	0.492154	0.623442	0.483411	0.407431	0.560165	0.605613	0.53374	0.67319	0.565529	0.492576	0.63575	0.53598	0.454334	0.615741	0.576649	0.497008	0.652497
84	0.590916	0.524889	0.653818	0.533998	0.461229	0.605347	0.621771	0.553819	0.685255	0.581612	0.488938	0.668863	0.556625	0.454371	0.654297	0.583885	0.468772	0.690522	0.590479	0.519096	0.658242	0.514991	0.433328	0.595861	0.635357	0.560319	0.704347	0.595203	0.517387	0.66851	0.565361	0.478889	0.64803	0.605351	0.521446	0.683475
85	0.622036	0.550392	0.68872	0.565496	0.486363	0.641427	0.651212	0.578657	0.717375	0.611284	0.513577	0.700798	0.585999	0.479019	0.685437	0.612709	0.493257	0.719987	0.622279	0.545764	0.693151	0.547358	0.459439	0.632418	0.664919	0.586357	0.735295	0.625262	0.542215	0.701536	0.595364	0.503618	0.680897	0.634379	0.545863	0.71466
86	0.653059	0.575529	0.723238	0.597391	0.511422	0.677763	0.68037	0.602935	0.748991	0.64122	0.538445	0.73248	0.615855	0.503926	0.716726	0.641816	0.518172	0.749094	0.653858	0.572011	0.72751	0.580172	0.485593	0.669208	0.693975	0.611703	0.765498	0.655354	0.566915	0.734201	0.625657	0.528357	0.713759	0.663402	0.570104	0.745491
87	0.683623	0.60022	0.75668	0.629318	0.536312	0.71363	0.708923	0.626589	0.779492	0.671058	0.563366	0.763346	0.645847	0.528925	0.747598	0.670865	0.543306	0.777393	0.684856	0.597722	0.760672	0.613064	0.511646	0.705542	0.722219	0.636253	0.794433	0.685122	0.591367	0.765882	0.655891	0.552971	0.746	0.692088	0.594045	0.775405
88	0.713377	0.624392	0.788424	0.660906	0.560947	0.748318	0.736568	0.649569	0.808341	0.700436	0.58818	0.792869	0.67562	0.553864	0.777496	0.699512	0.568457	0.804458	0.714925	0.622804	0.792059	0.645654	0.537473	0.740737	0.749374	0.659937	0.821646	0.714216	0.615461	0.796015	0.685714	0.577343	0.777029	0.720112	0.617579	0.803885
89	0.742002	0.647974	0.817971	0.691793	0.585248	0.7812	0.763033	0.671831	0.83511	0.729008	0.612735	0.820593	0.70482	0.578604	0.805913	0.727429	0.59344	0.829916	0.743755	0.647171	0.821204	0.677567	0.562964	0.774173	0.775198	0.682706	0.84678	0.742312	0.639096	0.824132	0.714786	0.601367	0.806327	0.747176	0.640615	0.830501
90	0.769221	0.670893	0.844961	0.721638	0.609132	0.811768	0.788093	0.693333	0.859506	0.756458	0.636889	0.846164	0.733117	0.603017	0.832428	0.754315	0.618085	0.853471	0.771081	0.670751	0.847777	0.708453	0.588019	0.805335	0.799499	0.704523	0.869598	0.769124	0.662177	0.849889	0.742795	0.624948	0.833479	0.773014	0.663068	0.854933
91	0.79481	0.693079	0.869186	0.750143	0.632517	0.839663	0.81157	0.714033	0.881367	0.782517	0.660514	0.869347	0.760215	0.626987	0.856731	0.779907	0.64224	0.874917	0.796696	0.693476	0.871593	0.737998	0.612542	0.83385	0.822134	0.725361	0.88998	0.794415	0.684612	0.873078	0.76947	0.647994	0.858199	0.79741	0.684863	0.876983
92	0.818604	0.714466	0.890579	0.77706	0.655322	0.864679	0.83334	0.733895	0.900652	0.806968	0.68349	0.890025	0.785866	0.650405	0.878633	0.803994	0.665769	0.894143	0.820449	0.715288	0.8926	0.765941	0.636445	0.859494	0.843013	0.745203	0.907916	0.818007	0.706317	0.893618	0.794591	0.67042	0.88033	0.820197	0.705931	0.896569
93	0.840499	0.734992	0.909191	0.802198	0.677468	0.886755	0.85333	0.752883	0.917426	0.829655	0.705712	0.90819	0.809874	0.67317	0.898058	0.826419	0.688557	0.911132	0.842254	0.736136	0.910862	0.792079	0.659647	0.882186	0.862094	0.764035	0.923484	0.839779	0.727217	0.911543	0.817991	0.692146	0.899838	0.841264	0.72621	0.913713
94	0.860449	0.754607	0.925167	0.825431	0.698882	0.905952	0.871518	0.77097	0.931828	0.850484	0.727087	0.923925	0.832106	0.695194	0.915036	0.847081	0.710505	0.92594	0.862078	0.755982	0.926528	0.816275	0.682072	0.90197	0.879383	0.781851	0.936832	0.859667	0.747244	0.926973	0.839566	0.713101	0.91679	0.86055	0.745647	0.928521
95	0.878459	0.773269	0.938715	0.846689	0.719498	0.922425	0.887926	0.788135	0.944051	0.869415	0.747539	0.937384	0.852483	0.716397	0.929678	0.865934	0.731533	0.938689	0.879943	0.774797	0.939811	0.83845	0.703655	0.918991	0.894922	0.798654	0.94815	0.877665	0.766345	0.940094	0.859263	0.733222	0.931332	0.878045	0.764198	0.941158
96	0.894581	0.790947	0.950083	0.865962	0.73926	0.936392	0.902611	0.804365	0.954321	0.886462	0.767006	0.948764	0.870983	0.736711	0.942155	0.882978	0.751575	0.949542	0.895909	0.792563	0.950954	0.858586	0.724343	0.933459	0.908785	0.814451	0.957653	0.893807	0.784478	0.951131	0.877084	0.752457	0.943664	0.893782	0.781829	0.951826
97	0.908899	0.807623	0.959531	0.883284	0.758121	0.948113	0.915659	0.819656	0.962871	0.901681	0.785442	0.95829	0.887629	0.756084	0.952672	0.898258	0.770587	0.958688	0.910071	0.809274	0.960216	0.876714	0.74409	0.945628	0.921069	0.829256	0.965562	0.908169	0.801613	0.960325	0.893071	0.770765	0.954015	0.907825	0.798517	0.960747
98	0.921526	0.823291	0.967319	0.898732	0.776047	0.957858	0.927175	0.834012	0.969934	0.915161	0.802818	0.966193	0.902488	0.774474	0.961454	0.91185	0.788538	0.966325	0.922547	0.824934	0.967854	0.892905	0.762864	0.955768	0.931887	0.843093	0.972096	0.920853	0.817733	0.96792	0.907303	0.788116	0.962626	0.920269	0.81425	0.968144
99	0.93259	0.837953	0.973693	0.91241	0.793015	0.965896	0.93728	0.847444	0.975729	0.927016	0.81912	0.972697	0.915651	0.791854	0.968727	0.923857	0.805413	0.972652	0.93347	0.839558	0.974107	0.907263	0.780645	0.96415	0.941362	0.855986	0.977458	0.93198	0.832836	0.974147	0.919884	0.804492	0.969732	0.931223	0.829024	0.974233
100	0.942229	0.851623	0.978879	0.924443	0.809012	0.972482	0.946098	0.859971	0.980455	0.937377	0.834348	0.978014	0.927236	0.808209	0.974705	0.934395	0.821211	0.977859	0.942982	0.853169	0.979198	0.919914	0.797421	0.97103	0.94962	0.867968	0.981833	0.941683	0.846928	0.979222	0.930935	0.819886	0.975558	0.940811	0.842847	0.979214

## Sheet: SC
	BELGIUM									BRUSSELS									FLANDERS									WALLONIA
	Both			Male			Female			Both			Male			Female			Both			Male			Female			Both			Male			Female
Age	mean	lwr	upr	mean	lwr	upr	mean	lwr	upr	mean	lwr	upr	mean	lwr	upr	mean	lwr	upr	mean	lwr	upr	mean	lwr	upr	mean	lwr	upr	mean	lwr	upr	mean	lwr	upr	mean	lwr	upr
ALL	0.0677712	0.0593123	0.0773373	0.0543906	0.0439644	0.0671157	0.08014	0.0678025	0.0944949	0.0528572	0.0361156	0.0767415	0.0421474	0.026966	0.0653021	0.062578	0.0428258	0.0905784	0.0734055	0.061386	0.0875589	0.0589895	0.0463632	0.0747847	0.086844	0.0706267	0.106359	0.0603473	0.0490844	0.0739934	0.0482401	0.0369777	0.0627092	0.0714039	0.0567129	0.0895392
15	0.00294592	0.000352386	0.0241662	0.00255609	0.000298166	0.0215441	0.00327	0.000385817	0.0271298	0.00144703	0.000168671	0.0122949	0.00125256	0.000142655	0.0109036	0.00160723	0.000184831	0.0138246	0.00389712	0.000491507	0.0301873	0.00337916	0.000415371	0.0269209	0.00433339	0.000539421	0.0339066	0.00204272	0.000248481	0.016578	0.00176108	0.000208511	0.0147041	0.00225942	0.000270588	0.0185944
16	0.00325266	0.000458776	0.0226749	0.00282441	0.000388624	0.0202183	0.003613	0.000503162	0.025454	0.0016616	0.000227325	0.0120362	0.00143958	0.000192528	0.0106779	0.00184711	0.000249539	0.013534	0.00424414	0.00062812	0.0280921	0.00368295	0.000531439	0.0250549	0.00472255	0.000690569	0.0315525	0.00228264	0.000324268	0.0158805	0.00196977	0.000272447	0.0140923	0.00252701	0.000353743	0.0178142
17	0.00359124	0.000595703	0.0213285	0.00312083	0.000505123	0.0190238	0.00399185	0.000654438	0.0239411	0.00190744	0.000305461	0.0118117	0.00165406	0.000259034	0.0104833	0.00212218	0.000335879	0.0132823	0.00462236	0.000800179	0.0262227	0.0040143	0.000677727	0.0233929	0.00514695	0.000881265	0.0294517	0.00255049	0.000421504	0.0152685	0.00220296	0.000354556	0.013557	0.00282599	0.000460622	0.0171298
18	0.00396498	0.000770537	0.0201359	0.00344827	0.000653936	0.0179684	0.00441027	0.000847903	0.022601	0.00218849	0.000408641	0.0116304	0.00189948	0.000346935	0.0103279	0.00243689	0.00045007	0.0130796	0.00503506	0.00101492	0.0245872	0.00437613	0.000860398	0.0219422	0.0056103	0.00111967	0.0276134	0.00284925	0.000544938	0.0147537	0.00246332	0.000458875	0.0131087	0.00315974	0.000596537	0.0165541
19	0.00437754	0.000991585	0.0191043	0.00380998	0.000842114	0.0170589	0.0048724	0.00109288	0.0214421	0.00250897	0.00054343	0.0115019	0.00217957	0.000461843	0.0102207	0.002796	0.000599456	0.012937	0.00548595	0.00127993	0.0231925	0.00477172	0.00108589	0.0207089	0.00611676	0.00141437	0.0260455	0.00318222	0.000699597	0.0143483	0.00275372	0.000589676	0.0127582	0.00353196	0.000767133	0.0161009
20	0.00483294	0.0012677	0.0182418	0.00420953	0.00107712	0.0163027	0.00538276	0.00139932	0.0204733	0.00287338	0.000717205	0.0114376	0.00249833	0.000610051	0.0101718	0.00320461	0.0007923	0.0128671	0.00597921	0.00160247	0.022046	0.00520477	0.00136033	0.0196996	0.00667107	0.0017736	0.0247566	0.00355292	0.000890328	0.0140661	0.00307731	0.000751082	0.012518	0.00394664	0.000977882	0.0157858
21	0.00533566	0.00160752	0.017558	0.00465087	0.00136617	0.0157088	0.00594637	0.00177695	0.0197058	0.00328643	0.000937698	0.0114508	0.00285994	0.000798134	0.0101936	0.00366808	0.00103726	0.0128855	0.00651959	0.00198834	0.0211583	0.00567948	0.00168857	0.0189241	0.00727854	0.002204	0.0237585	0.00396519	0.00112109	0.0139239	0.00343748	0.000946467	0.0124032	0.0044081	0.0012333	0.0156277
22	0.0058906	0.00201812	0.0170667	0.00513836	0.00171508	0.0152898	0.00656875	0.00223378	0.0191549	0.00375303	0.00121214	0.0115585	0.00326876	0.0010322	0.0103014	0.00419193	0.00134243	0.0130111	0.00711246	0.00244034	0.0205453	0.0062006	0.00207284	0.0183966	0.0079452	0.00270885	0.0230695	0.00442317	0.00139401	0.0139427	0.00383787	0.00117767	0.0124324	0.00492099	0.00153589	0.0156499
23	0.00650319	0.00250319	0.0167875	0.0056768	0.00212665	0.015064	0.00725598	0.00277397	0.0188429	0.00427812	0.00154596	0.0117818	0.00372918	0.00131679	0.0105146	0.00478177	0.00171386	0.0132684	0.0077639	0.00295638	0.0202306	0.0067735	0.00251123	0.0181385	0.00867789	0.00328588	0.0227163	0.00493128	0.00170836	0.0141482	0.00428241	0.00144414	0.0126284	0.00549029	0.00188501	0.0158813
24	0.00717943	0.00306058	0.0167482	0.00627148	0.00259876	0.0150563	0.00801477	0.00339518	0.0188014	0.00486661	0.00194108	0.0121477	0.00424558	0.00165344	0.0108573	0.00544313	0.00215367	0.0136879	0.00848086	0.00352774	0.0202471	0.00740433	0.00299633	0.0181788	0.00948438	0.00392539	0.0227361	0.00549425	0.00205983	0.0145713	0.00477526	0.00174238	0.0130185	0.00612131	0.002276	0.0163567
25	0.00792591	0.0036802	0.0169862	0.00692826	0.00312271	0.0153003	0.00885248	0.0040861	0.0190723	0.00552323	0.00239429	0.0126892	0.00482216	0.00203933	0.0113592	0.00618134	0.00265818	0.0143071	0.0092712	0.00413878	0.0206364	0.00810002	0.00351505	0.0185542	0.0103735	0.00460978	0.0231759	0.00611711	0.00244067	0.0152468	0.00532087	0.00206604	0.0136333	0.00681966	0.00270035	0.017115
26	0.00874992	0.00434361	0.0175474	0.00765356	0.00368314	0.0158361	0.00977725	0.00482605	0.0197074	0.00625232	0.00289644	0.013444	0.0054628	0.00246674	0.0120539	0.00700128	0.00321706	0.0151691	0.0101439	0.00476929	0.0214448	0.00886854	0.00405074	0.0193054	0.0113552	0.0053162	0.0240882	0.00680517	0.00284117	0.0162098	0.00592392	0.00240714	0.0145039	0.00759127	0.00314726	0.0181958
27	0.0096595	0.00502732	0.0184805	0.00845449	0.00426098	0.0167059	0.010798	0.00558864	0.0207618	0.00705766	0.00343363	0.0144512	0.00617086	0.00292408	0.0129758	0.00790717	0.00381474	0.016318	0.0111093	0.00540021	0.022716	0.00971892	0.00458791	0.0204703	0.0124411	0.00602301	0.0255225	0.00756403	0.00325243	0.017491	0.00658933	0.00275837	0.0156574	0.00844237	0.00360675	0.0196334
28	0.0106635	0.00571041	0.0198271	0.00933885	0.00483967	0.0179453	0.0119245	0.00635039	0.0222818	0.00794222	0.0039909	0.0157438	0.00694899	0.00339902	0.014154	0.00890228	0.00443448	0.017791	0.012179	0.00602081	0.0244806	0.0106615	0.00511794	0.0220765	0.013644	0.00671789	0.0275132	0.0083995	0.0036694	0.0191101	0.00732221	0.0031155	0.0171115	0.00937941	0.004073	0.0214502
29	0.0117716	0.00638345	0.021609	0.0103152	0.005412	0.0195734	0.0131677	0.00710057	0.024292	0.00890788	0.00455715	0.0173399	0.00779888	0.00388241	0.0156043	0.00998866	0.00506395	0.0196083	0.0133665	0.00663375	0.0267483	0.0117082	0.00564314	0.0241337	0.0149791	0.00740357	0.0300713	0.00931765	0.004093	0.0210704	0.00812788	0.00347918	0.0188703	0.0104091	0.0045468	0.0236501
30	0.0129947	0.00705341	0.0238203	0.0113931	0.00598386	0.021586	0.0145392	0.00784683	0.0267854	0.00995521	0.00512901	0.0192349	0.008721	0.00437146	0.017323	0.0111668	0.00569941	0.0217641	0.0146871	0.00725566	0.0295039	0.0128726	0.00617721	0.0266306	0.0164634	0.00809849	0.0331792	0.0103247	0.0045306	0.0233549	0.00901177	0.00385536	0.0209199	0.0115381	0.00503609	0.0262138
31	0.0143444	0.00774263	0.0264252	0.0125829	0.00657342	0.0239537	0.0160522	0.00861388	0.0297212	0.0110831	0.0057118	0.0213967	0.00971436	0.00487043	0.0192825	0.0124352	0.00634673	0.0242221	0.0161586	0.00791443	0.0327074	0.0141703	0.00674316	0.0295345	0.0181163	0.00883373	0.0367912	0.011427	0.0049953	0.0259239	0.00997941	0.00425479	0.0232266	0.0127736	0.00555525	0.0290967
32	0.0158338	0.00848459	0.0293602	0.0138959	0.00720799	0.0266229	0.0177208	0.00943883	0.0330274	0.0122885	0.00631807	0.0237658	0.0107762	0.00538949	0.0214309	0.0137904	0.00701977	0.0269142	0.0178013	0.00864618	0.0362955	0.0156191	0.00737101	0.0327919	0.0199605	0.00964957	0.0408348	0.0126309	0.00550497	0.0287146	0.0110364	0.00469228	0.025736	0.0141222	0.00612403	0.0322277
33	0.0174771	0.00932049	0.0325373	0.0153448	0.00792135	0.0295183	0.0195606	0.0103673	0.0366045	0.0135661	0.00696523	0.0262573	0.0119019	0.00594286	0.0236937	0.015226	0.00773771	0.029744	0.0196385	0.00949397	0.0401829	0.0172398	0.00809666	0.0363299	0.0220216	0.010594	0.045213	0.0139428	0.00608176	0.0316414	0.0121881	0.00518622	0.0283737	0.015591	0.0067669	0.0355103
34	0.01929	0.0102984	0.0358476	0.0169433	0.00875304	0.0325457	0.0215886	0.0114527	0.0403292	0.0149084	0.00767355	0.0287666	0.0130844	0.00654711	0.0259784	0.0167332	0.00852289	0.0325927	0.0216971	0.0105086	0.0442651	0.0190562	0.00896258	0.0400579	0.0243294	0.0117234	0.0498071	0.0153691	0.00675224	0.0345991	0.0134401	0.00575874	0.0310474	0.0171864	0.00751327	0.0388262
35	0.0212873	0.0114701	0.0391741	0.0187045	0.00974536	0.0356038	0.0238209	0.0127518	0.0440697	0.0163065	0.00846335	0.0311893	0.0143159	0.00721878	0.0281926	0.0183018	0.00939764	0.0353417	0.024004	0.0117458	0.0484283	0.021092	0.0100151	0.0438771	0.0269129	0.0130996	0.0544878	0.0169152	0.00754582	0.0374789	0.0147971	0.00643421	0.0336614	0.0189144	0.00839564	0.0420529
36	0.0234748	0.0128735	0.0424309	0.0206335	0.0109291	0.0386182	0.0262634	0.0143065	0.0477297	0.0177571	0.00934861	0.0334729	0.0155935	0.00796914	0.0302896	0.0199279	0.0103774	0.037931	0.0265697	0.0132463	0.0525796	0.0233566	0.0112879	0.0477065	0.0297836	0.0147678	0.0591509	0.0185845	0.00848602	0.0402129	0.0162619	0.00723197	0.0361561	0.0207782	0.00943993	0.0451144
37	0.0258521	0.0145405	0.0455566	0.0227302	0.0123292	0.0415365	0.0289154	0.0161515	0.0512408	0.019259	0.0103377	0.0356024	0.016916	0.00880468	0.0322568	0.02161	0.0114715	0.0403432	0.0293947	0.0150446	0.0566452	0.0258512	0.0128087	0.0514816	0.0329414	0.0167654	0.0637136	0.0203782	0.00959358	0.0427629	0.0178357	0.0081688	0.0384984	0.022779	0.0106689	0.0479685
38	0.0284136	0.0164981	0.0485104	0.0249899	0.0139655	0.0443258	0.0317701	0.0183157	0.0545584	0.0208122	0.0114334	0.0375917	0.0182834	0.00972711	0.0341068	0.0233477	0.0126831	0.042593	0.0324709	0.0171695	0.0605683	0.0285688	0.0146002	0.0551537	0.0363766	0.0191239	0.0681131	0.0222958	0.0108872	0.045114	0.0195182	0.00925943	0.0406764	0.0249159	0.0121029	0.0505991
39	0.0311472	0.0187643	0.0512747	0.0274023	0.0158496	0.0469741	0.0348136	0.0208179	0.0576643	0.0224177	0.0126319	0.0394813	0.0196966	0.0107325	0.0358763	0.0251424	0.0140082	0.0447252	0.0357792	0.0196395	0.0643123	0.0314932	0.0166755	0.058692	0.0400672	0.0218627	0.0723095	0.0243345	0.0123814	0.0472748	0.0213071	0.0105147	0.042699	0.0271858	0.0137575	0.0530165
40	0.0340332	0.0213415	0.0538574	0.0299504	0.0179784	0.0494928	0.0380239	0.0236592	0.060569	0.024078	0.0139211	0.0413349	0.0211581	0.0118105	0.0376224	0.0269968	0.0154342	0.0468098	0.0392872	0.0224542	0.067863	0.0345962	0.0190312	0.0620855	0.0439766	0.0249803	0.0762885	0.026489	0.0140834	0.049276	0.0231979	0.0119388	0.0445956	0.0295825	0.01564	0.0552565
41	0.0370435	0.0242071	0.0562942	0.0326096	0.0203283	0.0519176	0.0413694	0.0268129	0.0633143	0.0257975	0.0152811	0.0432335	0.0226716	0.0129441	0.0394173	0.0289156	0.0169398	0.0489365	0.0429474	0.0255855	0.0712296	0.0378363	0.0216405	0.0653433	0.0480515	0.0284438	0.0800619	0.0287511	0.0159892	0.0511694	0.0251837	0.0135267	0.0464138	0.0320969	0.0177452	0.0573776
42	0.0401407	0.0273032	0.0586502	0.0353474	0.022847	0.0543071	0.0448085	0.0302135	0.0659741	0.0275819	0.0166848	0.0452684	0.0242426	0.0141119	0.0413412	0.0309057	0.0184966	0.0512055	0.0466956	0.0289665	0.0744442	0.0411571	0.0244454	0.0684916	0.0522203	0.0321781	0.0836668	0.0311097	0.0180794	0.053024	0.027255	0.0152604	0.0482158	0.0347166	0.0200509	0.0594582
43	0.0432774	0.030527	0.0610183	0.0381223	0.0254498	0.0567377	0.048289	0.033747	0.068652	0.0294395	0.0181035	0.0475303	0.0258785	0.0152908	0.0434737	0.032976	0.0200738	0.0537163	0.0504506	0.0324851	0.0775553	0.0444872	0.0273521	0.0715669	0.0563928	0.0360581	0.0871583	0.0335501	0.0203161	0.0549215	0.0293995	0.0171075	0.0500735	0.0374255	0.0225143	0.06159
44	0.0463971	0.0337295	0.0635094	0.0408847	0.0280226	0.0592901	0.0517483	0.0372509	0.0714692	0.0313803	0.0195127	0.0500971	0.0275887	0.0164625	0.0458835	0.0351382	0.0216457	0.056555	0.0541144	0.0359847	0.0806143	0.0477397	0.0302343	0.0746009	0.0604607	0.0399108	0.0905933	0.0360542	0.0226426	0.0569469	0.0316016	0.019022	0.0520588	0.0402039	0.0250727	0.0638684
45	0.0494337	0.0367328	0.0662243	0.0435764	0.0304378	0.0620235	0.0551142	0.0405333	0.0745329	0.0334173	0.0209012	0.0530224	0.0293847	0.017619	0.0486184	0.0374068	0.0232	0.0597809	0.0575741	0.0392789	0.0836489	0.0508147	0.0329459	0.0775974	0.0642998	0.0435316	0.0940025	0.0386005	0.0249898	0.0591743	0.0338428	0.0209499	0.0542309	0.0430281	0.0276497	0.0663761
46	0.0523137	0.0393709	0.0692047	0.0461326	0.0325818	0.0649409	0.058306	0.0434174	0.0778845	0.0355658	0.0222763	0.0563266	0.0312808	0.0187668	0.0516995	0.0397994	0.0247447	0.0634177	0.0607056	0.0421824	0.0866271	0.0536018	0.0353443	0.0805034	0.0677738	0.046718	0.0973501	0.0411637	0.0272886	0.0616466	0.0361017	0.0228393	0.0566191	0.045871	0.0301698	0.0691609
47	0.0549572	0.0415405	0.0723799	0.0484828	0.034383	0.0679577	0.0612365	0.0457927	0.0814443	0.0378444	0.0236657	0.0599961	0.033294	0.0199282	0.0551201	0.0423369	0.0263093	0.067452	0.0633781	0.0445486	0.0894216	0.0559845	0.0373163	0.0831849	0.0707393	0.0493101	0.100497	0.0437152	0.029487	0.0643537	0.0383537	0.024653	0.0592062	0.0487015	0.0325766	0.0722124
48	0.0572811	0.0432262	0.0755452	0.0505533	0.0358242	0.070893	0.0638151	0.0476408	0.0849908	0.0402754	0.0251138	0.0639896	0.0354446	0.0211384	0.0588511	0.0450444	0.0279424	0.0718399	0.0654609	0.0462962	0.0917954	0.0578459	0.038795	0.0854207	0.0730533	0.0512182	0.103185	0.0462235	0.0315649	0.0672169	0.0405715	0.0263774	0.0619179	0.0514857	0.034848	0.0754459
49	0.0592022	0.0444841	0.0783905	0.0522702	0.0369339	0.0734886	0.0659511	0.0490181	0.0881911	0.0428847	0.0266758	0.068252	0.0377566	0.0224412	0.0628522	0.0479514	0.0297048	0.0765224	0.0668307	0.047411	0.0934247	0.0590759	0.0397615	0.0869229	0.074581	0.0524245	0.105063	0.0486541	0.0335379	0.0700894	0.0427255	0.0280251	0.0646244	0.0541865	0.0370003	0.0787031
50	0.0606588	0.0454076	0.0806	0.0535785	0.0377695	0.0754854	0.0675774	0.0500216	0.0907065	0.0456985	0.028401	0.0727422	0.0402539	0.0238756	0.0670951	0.0510872	0.0316509	0.0814551	0.0674104	0.0479384	0.0940107	0.059605	0.040243	0.0874339	0.075238	0.0529763	0.105809	0.0509773	0.0354481	0.072796	0.04479	0.0296276	0.0671747	0.0567719	0.0390779	0.0817956
51	0.0616726	0.0460988	0.0820553	0.0544964	0.0384041	0.0767933	0.0687178	0.05076	0.0924101	0.0487274	0.030294	0.0774813	0.0429466	0.0254455	0.0716004	0.0544635	0.0337862	0.0866603	0.067267	0.047987	0.0935321	0.0594919	0.0403228	0.0869482	0.0750976	0.0529919	0.105398	0.0531906	0.0373377	0.0752482	0.0467624	0.0312166	0.0694945	0.0592392	0.041125	0.0846279
52	0.0622975	0.0466351	0.0827634	0.0550706	0.0388972	0.0774273	0.0694309	0.0513169	0.0933099	0.0519771	0.032331	0.0825429	0.0458398	0.0271323	0.0764324	0.0580854	0.0360842	0.0922178	0.0665199	0.0476618	0.0921178	0.0588419	0.0400853	0.0855925	0.0742905	0.0525868	0.103969	0.0553031	0.0392326	0.0774259	0.0486499	0.0328115	0.071568	0.0615978	0.0431683	0.0871785
53	0.0625981	0.0470712	0.0828017	0.0553575	0.0392926	0.077461	0.0697871	0.0517507	0.0934899	0.0554512	0.0344702	0.0880383	0.0489369	0.0289041	0.0816861	0.0619562	0.0384979	0.0982481	0.0653009	0.0470486	0.0899656	0.0577717	0.039602	0.0835526	0.0729611	0.0518562	0.101734	0.0573289	0.0411423	0.0793567	0.0504644	0.0344197	0.0734196	0.0638628	0.0452169	0.0894771
54	0.0626459	0.047445	0.0822962	0.0554197	0.0396228	0.0770094	0.0698642	0.0521021	0.0930871	0.0591513	0.0366566	0.0941018	0.0522397	0.0307192	0.0874761	0.0660767	0.0409655	0.104897	0.0637452	0.0462178	0.0873111	0.0564009	0.038933	0.0810452	0.0712572	0.0508791	0.0989462	0.0592868	0.0430611	0.0811082	0.0522215	0.0360375	0.0751073	0.066054	0.0472636	0.0915964
55	0.062516	0.0477832	0.0814031	0.0553231	0.0399118	0.0762128	0.0697443	0.0523997	0.0922711	0.0630768	0.0388309	0.100873	0.0557473	0.0325324	0.0939202	0.0704443	0.0434196	0.112314	0.0619841	0.0452279	0.0843995	0.0548462	0.0381301	0.078294	0.069323	0.0497225	0.0958705	0.0611999	0.04497	0.0827795	0.0539409	0.0376519	0.076715	0.068196	0.0492886	0.093642
56	0.0622851	0.0481042	0.0802938	0.0551351	0.0401781	0.0752237	0.0695109	0.0526641	0.091228	0.0672238	0.0409401	0.108473	0.0594563	0.0343031	0.101122	0.0750533	0.0457995	0.12063	0.0601405	0.0441302	0.0814642	0.0532164	0.0372393	0.0755106	0.0672936	0.0484465	0.0927581	0.0630957	0.0468406	0.0844916	0.0556457	0.0392439	0.0783437	0.0703179	0.0512631	0.0957406
57	0.0620294	0.0484216	0.0791433	0.0549228	0.0404375	0.0741959	0.0692474	0.0529117	0.0901464	0.0715852	0.0429482	0.116983	0.0633598	0.0360029	0.10915	0.0798939	0.0480632	0.129928	0.0583258	0.0429739	0.0787109	0.0516103	0.0363043	0.0728814	0.065292	0.0471093	0.0898312	0.0650052	0.0486413	0.0863745	0.0573628	0.0407924	0.0801021	0.072453	0.0531575	0.0980272
58	0.0618241	0.0487471	0.078121	0.0547527	0.0407057	0.0732768	0.0690361	0.0531595	0.0892077	0.0761502	0.0448426	0.126423	0.0674477	0.0376201	0.118024	0.0849518	0.0501951	0.140222	0.0566398	0.0418111	0.0763088	0.0501164	0.0353703	0.0705606	0.0634286	0.045772	0.0872733	0.0669638	0.0503469	0.0885537	0.0591222	0.0422816	0.0820956	0.0746386	0.0549506	0.10063
59	0.0617437	0.0490968	0.0773832	0.0546903	0.0410025	0.0726016	0.0689586	0.0534304	0.0885774	0.0809038	0.0466361	0.13674	0.0717056	0.0391624	0.127697	0.0902078	0.0522078	0.151447	0.0551716	0.0407009	0.0743882	0.0488135	0.0344866	0.0686691	0.0618021	0.0445022	0.0852274	0.0690106	0.0519502	0.091135	0.0609579	0.0437073	0.0844158	0.0769166	0.05664	0.103654
60	0.0618627	0.0494971	0.0770671	0.0548015	0.0413555	0.0722894	0.0690967	0.0537602	0.0883996	0.0858265	0.0483638	0.147801	0.0761149	0.0406549	0.138053	0.0956376	0.0541393	0.163448	0.0540021	0.0397113	0.0730446	0.0477732	0.0337083	0.0672978	0.0605025	0.0433751	0.0838006	0.0711891	0.0534715	0.094193	0.0629072	0.0450846	0.0871326	0.0793332	0.0582513	0.107177
61	0.0622577	0.0499928	0.0772868	0.0551538	0.0418053	0.0724421	0.0695341	0.0542033	0.088794	0.090894	0.0500786	0.159393	0.0806524	0.0421373	0.148899	0.101211	0.0560473	0.175985	0.0532083	0.0389198	0.0723475	0.0470631	0.0330979	0.0665155	0.0596152	0.0424739	0.083074	0.0735477	0.054963	0.0977664	0.0650122	0.0464505	0.090289	0.0819398	0.0598402	0.111235
62	0.06301	0.0506533	0.078133	0.0558188	0.0424086	0.0731458	0.0703597	0.0548373	0.0898581	0.0960772	0.0518462	0.171228	0.0852901	0.0436605	0.159973	0.106894	0.0580038	0.188736	0.0528677	0.0384126	0.0723533	0.046752	0.0327247	0.0663793	0.0592262	0.0418893	0.0831159	0.0761406	0.0565059	0.101861	0.0673198	0.0478647	0.0939029	0.0847937	0.0614906	0.115838
63	0.0642092	0.0515749	0.0796785	0.0568758	0.0432407	0.0744758	0.0716711	0.0557646	0.0916742	0.101342	0.0537415	0.182952	0.0899951	0.0452836	0.170949	0.112644	0.0600908	0.201314	0.0530655	0.0382844	0.0731195	0.0469145	0.0326668	0.0669464	0.0594294	0.0417204	0.0839964	0.0790287	0.0582048	0.106461	0.0698828	0.0494062	0.0979713	0.0879592	0.0633093	0.120967
64	0.0659427	0.052867	0.0819725	0.0584017	0.0443859	0.0764891	0.073563	0.0570973	0.0943021	0.106653	0.0558397	0.194196	0.0947343	0.0470668	0.181483	0.118421	0.0623902	0.213321	0.0538835	0.0386268	0.074698	0.0476226	0.033	0.0682671	0.0603144	0.0420619	0.0857781	0.0822723	0.0601701	0.11153	0.0727536	0.0511612	0.102475	0.0914995	0.0654087	0.126588
65	0.0682514	0.0545999	0.0850093	0.0604327	0.0458975	0.0791888	0.0760785	0.0589041	0.0977405	0.111993	0.0581906	0.204727	0.0994889	0.0490508	0.191355	0.124201	0.0649559	0.224508	0.0553506	0.039481	0.0770873	0.0489016	0.0337599	0.0703401	0.0619121	0.0429551	0.0884618	0.0859045	0.0624737	0.117026	0.0759612	0.0531878	0.10738	0.0954486	0.0678613	0.132655
66	0.0711732	0.0568342	0.0887894	0.063002	0.0478229	0.082581	0.0792569	0.0612436	0.101993	0.117346	0.0608319	0.214377	0.104245	0.0512662	0.200407	0.129968	0.0678281	0.234703	0.0574987	0.0408851	0.080298	0.0507791	0.0349794	0.0731741	0.0642554	0.0444378	0.0920594	0.0899533	0.0651711	0.12292	0.0795302	0.0555321	0.112662	0.0998343	0.0707228	0.139135
67	0.0747583	0.0596359	0.0933348	0.066154	0.0502152	0.0866903	0.0831501	0.0641807	0.107084	0.122698	0.0637967	0.223025	0.108989	0.05374	0.208521	0.135705	0.0710413	0.243781	0.0603803	0.0428925	0.0843695	0.0533013	0.0367044	0.0768045	0.0673994	0.0465641	0.0966128	0.0944498	0.0683137	0.129199	0.0834878	0.0582371	0.118311	0.104687	0.0740445	0.146012
68	0.0790697	0.0630789	0.0986871	0.0699447	0.0531346	0.0915586	0.087823	0.0677887	0.11306	0.128035	0.0671144	0.230586	0.113707	0.0564954	0.215615	0.141396	0.0746251	0.251662	0.0640702	0.0455756	0.0893672	0.056534	0.0389963	0.0812918	0.0714227	0.0494081	0.102192	0.0994279	0.071951	0.135862	0.0878638	0.0613441	0.12433	0.110041	0.0778754	0.153284
69	0.0841844	0.0672479	0.104907	0.0744423	0.0566508	0.0972453	0.0933548	0.0721517	0.119983	0.133345	0.0708099	0.237021	0.118386	0.0595515	0.221649	0.147026	0.0786037	0.25831	0.0686673	0.049029	0.0953827	0.0605646	0.0419348	0.0867217	0.0764288	0.053067	0.108893	0.104925	0.0761307	0.142925	0.0926911	0.064893	0.130732	0.115932	0.0822628	0.160964
70	0.0901941	0.0722399	0.112072	0.0797284	0.0608437	0.103827	0.0998391	0.0773662	0.127935	0.138616	0.0749019	0.242329	0.123016	0.0629219	0.226623	0.152581	0.082994	0.263735	0.0742971	0.0533735	0.102535	0.0655044	0.0456215	0.0932064	0.0825487	0.0576645	0.11684	0.110981	0.0808991	0.150417	0.0980051	0.0689219	0.137548	0.122399	0.0872516	0.169081
71	0.097206	0.0781658	0.120279	0.0858992	0.065805	0.111398	0.107385	0.0835429	0.137013	0.143835	0.0793997	0.246556	0.127584	0.0666122	0.230578	0.15805	0.0878016	0.26799	0.0811146	0.0587599	0.110971	0.0714914	0.0501825	0.100888	0.0899436	0.0633547	0.126188	0.117638	0.0862985	0.158386	0.103844	0.0734654	0.144821	0.129482	0.0928825	0.177679
72	0.105344	0.0851511	0.129647	0.0930659	0.0716389	0.120073	0.116116	0.0908063	0.147338	0.148992	0.0842976	0.249792	0.13208	0.0706155	0.233598	0.163419	0.0930155	0.271177	0.0893078	0.0653719	0.120874	0.078694	0.0557718	0.10994	0.0988075	0.070325	0.137124	0.124944	0.0923639	0.166903	0.110249	0.0785525	0.152617	0.137227	0.0991887	0.186826
73	0.114748	0.0933349	0.140314	0.101356	0.0784619	0.129989	0.126174	0.0992945	0.159046	0.154078	0.089567	0.252182	0.136496	0.0749063	0.235817	0.168678	0.0985991	0.273456	0.0991006	0.073429	0.132464	0.0873143	0.0625737	0.120579	0.10937	0.0787984	0.149872	0.132945	0.0991178	0.176062	0.117264	0.0842022	0.161024	0.145677	0.106191	0.196614
74	0.125577	0.102867	0.152447	0.110915	0.0864014	0.141307	0.137715	0.109157	0.172299	0.159083	0.0951442	0.253931	0.140822	0.0794322	0.237421	0.173819	0.104478	0.275047	0.110756	0.0831861	0.146007	0.0975916	0.0708032	0.133064	0.121896	0.0890329	0.164696	0.141693	0.106563	0.185994	0.124934	0.0904193	0.170159	0.154879	0.113893	0.207166
75	0.138002	0.113904	0.166242	0.121902	0.0955934	0.154216	0.150906	0.120548	0.187281	0.164	0.100915	0.255322	0.145052	0.0841024	0.238662	0.178833	0.110524	0.276249	0.124575	0.0949289	0.161824	0.109804	0.0807044	0.147711	0.136689	0.101317	0.181911	0.15124	0.114675	0.196871	0.133307	0.0971883	0.180171	0.164881	0.122271	0.218643
76	0.152213	0.126598	0.18193	0.134494	0.106178	0.168936	0.165928	0.133623	0.204203	0.168823	0.106697	0.256725	0.149178	0.0887753	0.239861	0.183715	0.116536	0.277457	0.140898	0.108962	0.180301	0.124271	0.0925438	0.164898	0.154085	0.11596	0.201882	0.161637	0.123394	0.208908	0.142434	0.104468	0.19125	0.175731	0.131268	0.231245
77	0.168404	0.141088	0.199779	0.148882	0.118292	0.185716	0.182968	0.148526	0.223302	0.173544	0.11222	0.258619	0.153197	0.0932475	0.241425	0.188457	0.122224	0.279166	0.160096	0.125589	0.201896	0.141346	0.106597	0.185076	0.174441	0.133269	0.225031	0.172938	0.13262	0.22237	0.152363	0.11219	0.203621	0.187474	0.140794	0.245214
78	0.186778	0.157483	0.220098	0.165263	0.132063	0.20484	0.202209	0.165377	0.244837	0.178161	0.117125	0.261581	0.157102	0.0972515	0.243837	0.193057	0.127209	0.281978	0.182558	0.145079	0.227148	0.161415	0.123132	0.208768	0.198125	0.153523	0.25183	0.185193	0.142219	0.237556	0.163145	0.120258	0.217544	0.200154	0.150719	0.260824
79	0.207528	0.175853	0.243225	0.18384	0.147601	0.22661	0.223824	0.184258	0.269084	0.182669	0.120994	0.26626	0.160892	0.100474	0.247638	0.19751	0.131054	0.286553	0.208669	0.167631	0.256656	0.184876	0.142382	0.236553	0.225486	0.176935	0.282782	0.198452	0.152036	0.254782	0.17483	0.128559	0.233297	0.213813	0.160894	0.278362
80	0.230833	0.196218	0.269507	0.204806	0.164988	0.251341	0.247965	0.205207	0.296312	0.187066	0.123428	0.273285	0.164563	0.102605	0.253371	0.201816	0.133351	0.293528	0.238776	0.193344	0.291031	0.212111	0.164525	0.269029	0.25682	0.203615	0.318369	0.212759	0.161914	0.274344	0.187465	0.136972	0.251156	0.228485	0.17116	0.298105
81	0.256836	0.218552	0.299257	0.228337	0.184278	0.279323	0.274742	0.228206	0.326749	0.191349	0.124154	0.283154	0.168115	0.103407	0.261505	0.205974	0.133825	0.303395	0.273141	0.222202	0.33079	0.243458	0.189668	0.306728	0.292322	0.233549	0.358959	0.228152	0.171724	0.296486	0.201095	0.145388	0.271369	0.2442	0.181372	0.320277
82	0.285629	0.242797	0.332698	0.254573	0.205493	0.310791	0.304208	0.253191	0.360542	0.195518	0.1231	0.29615	0.171546	0.102774	0.272369	0.209983	0.132414	0.316419	0.311886	0.254091	0.376198	0.27915	0.217844	0.349989	0.332034	0.2666	0.404666	0.244662	0.181372	0.321368	0.215757	0.15372	0.294128	0.260978	0.191421	0.345027
83	0.317232	0.268869	0.369894	0.283601	0.228627	0.345867	0.336342	0.280054	0.397693	0.199573	0.120397	0.31233	0.174858	0.100756	0.286118	0.213845	0.129262	0.332632	0.354931	0.28883	0.427075	0.319261	0.249016	0.3988	0.375783	0.302526	0.455201	0.26231	0.190809	0.349046	0.231483	0.161909	0.319555	0.278829	0.201232	0.372399
84	0.351572	0.296678	0.410693	0.315432	0.253646	0.384514	0.371026	0.308656	0.438014	0.203515	0.116304	0.331584	0.178051	0.0975245	0.302763	0.217563	0.124647	0.351896	0.401932	0.326189	0.482663	0.363642	0.283083	0.452651	0.423136	0.34101	0.509741	0.281101	0.200018	0.379463	0.248298	0.169924	0.347679	0.297751	0.210772	0.402325
85	0.388464	0.326117	0.454688	0.349982	0.280493	0.426483	0.408037	0.338838	0.481085	0.207347	0.111134	0.353707	0.181128	0.0933161	0.322207	0.221138	0.118901	0.373972	0.452244	0.365885	0.541578	0.411861	0.319874	0.510448	0.473376	0.381669	0.566916	0.301031	0.209008	0.412444	0.266213	0.177756	0.378429	0.317725	0.220033	0.434622
86	0.427598	0.357056	0.501212	0.387058	0.30908	0.471289	0.447033	0.370413	0.526253	0.211069	0.10519	0.378447	0.184091	0.0883834	0.344295	0.224576	0.112346	0.398579	0.504923	0.407561	0.601913	0.463183	0.359137	0.570536	0.525514	0.424059	0.624905	0.322075	0.217799	0.447701	0.285227	0.185409	0.41163	0.338721	0.229028	0.468992
87	0.468539	0.389334	0.549363	0.426339	0.339287	0.518209	0.487559	0.403174	0.572659	0.214687	0.0987401	0.405524	0.186944	0.0829631	0.368832	0.227882	0.105269	0.425405	0.558765	0.450769	0.661473	0.516571	0.400522	0.63086	0.578346	0.467668	0.681677	0.344191	0.226416	0.484833	0.305326	0.192896	0.446994	0.360688	0.23778	0.505032
88	0.510737	0.422746	0.598068	0.467383	0.370953	0.566312	0.529061	0.436882	0.619299	0.218203	0.0920094	0.434628	0.189691	0.0772609	0.395588	0.231059	0.0979112	0.454122	0.612409	0.494967	0.718095	0.570757	0.44357	0.689239	0.63056	0.511914	0.735279	0.367317	0.234887	0.52334	0.326479	0.200237	0.484131	0.383557	0.246314	0.542254
89	0.553546	0.457043	0.646175	0.509632	0.403878	0.614531	0.570909	0.471266	0.665118	0.221623	0.0851814	0.465424	0.192337	0.0714474	0.424304	0.234115	0.0904686	0.484378	0.664467	0.539529	0.76996	0.624346	0.487722	0.743683	0.680858	0.556169	0.784115	0.39137	0.243236	0.562644	0.348634	0.20745	0.522552	0.407244	0.254657	0.5801
90	0.596267	0.491936	0.692563	0.552442	0.437813	0.661756	0.612438	0.506031	0.7091	0.224952	0.0784024	0.497544	0.194887	0.0656597	0.454682	0.237057	0.0830979	0.515799	0.713669	0.583778	0.815814	0.675963	0.532333	0.792663	0.728092	0.599777	0.827125	0.416246	0.251486	0.602117	0.371724	0.214553	0.561694	0.431643	0.262836	0.61798
91	0.638188	0.527098	0.736241	0.595116	0.472472	0.706934	0.652985	0.540856	0.750369	0.228195	0.0717859	0.53059	0.197347	0.0600048	0.486388	0.239891	0.075921	0.54799	0.75899	0.62703	0.855054	0.724393	0.576711	0.835267	0.771365	0.6421	0.863843	0.441822	0.259657	0.641116	0.395661	0.221565	0.600947	0.456634	0.270874	0.655295
92	0.678637	0.562185	0.776433	0.636952	0.507533	0.749169	0.691936	0.575411	0.78825	0.23136	0.0654182	0.564144	0.199725	0.0545633	0.519054	0.242626	0.0690299	0.580546	0.799725	0.66864	0.887665	0.768692	0.620158	0.871206	0.810094	0.682555	0.894325	0.467957	0.267765	0.679025	0.420338	0.228501	0.639691	0.482081	0.278791	0.691482
93	0.71702	0.596841	0.812622	0.677287	0.542654	0.787787	0.728764	0.609369	0.822308	0.234452	0.0593625	0.597779	0.202025	0.0493935	0.552287	0.245269	0.0624915	0.613059	0.835515	0.708041	0.914085	0.808255	0.662013	0.900711	0.844013	0.720647	0.919021	0.494494	0.275825	0.715289	0.445632	0.235377	0.677329	0.507836	0.286607	0.726038
94	0.752861	0.630722	0.844558	0.715543	0.577479	0.822369	0.763052	0.642415	0.852345	0.237481	0.0536619	0.631071	0.204257	0.0445351	0.585678	0.247831	0.0563512	0.645134	0.866317	0.74478	0.935027	0.842819	0.701701	0.924373	0.873143	0.755995	0.938614	0.521263	0.283852	0.749443	0.471404	0.242207	0.713327	0.533741	0.294339	0.758549
95	0.785818	0.663507	0.872232	0.751256	0.611663	0.85275	0.794514	0.674264	0.878379	0.240453	0.0483436	0.663621	0.206428	0.0400121	0.618822	0.250319	0.0506364	0.676404	0.892344	0.778537	0.951324	0.872423	0.738759	0.942976	0.897728	0.788345	0.953889	0.548089	0.291856	0.781136	0.4975	0.249001	0.747239	0.559634	0.302002	0.788706
96	0.81569	0.694912	0.895822	0.784097	0.644878	0.87898	0.822989	0.704668	0.900594	0.243376	0.043421	0.695065	0.208545	0.0358361	0.651326	0.252743	0.04536	0.706538	0.913986	0.809129	0.963815	0.897337	0.772859	0.957362	0.918164	0.817571	0.965622	0.574793	0.299847	0.810136	0.523759	0.255773	0.778728	0.585353	0.30961	0.816307
97	0.842408	0.7247	0.915646	0.813875	0.676829	0.901281	0.84844	0.733426	0.919292	0.24626	0.0388967	0.725091	0.210618	0.0320084	0.682833	0.255114	0.040523	0.735259	0.931734	0.8365	0.973269	0.917989	0.803809	0.968335	0.93493	0.84366	0.974526	0.601196	0.307836	0.836328	0.550016	0.262533	0.807572	0.610738	0.317174	0.841258
98	0.866018	0.752689	0.932099	0.840528	0.707267	0.919987	0.870928	0.760387	0.934843	0.249114	0.0347645	0.753449	0.212656	0.0285226	0.713028	0.257441	0.0361169	0.762346	0.946118	0.860707	0.980353	0.934885	0.831548	0.976613	0.948532	0.866696	0.981217	0.627129	0.315831	0.859704	0.576101	0.269292	0.83366	0.635635	0.324709	0.863557
99	0.886656	0.778751	0.94561	0.864103	0.735992	0.935496	0.890594	0.785451	0.947645	0.251947	0.0310117	0.77995	0.214666	0.0253664	0.741655	0.259735	0.0321261	0.787638	0.957662	0.881892	0.985616	0.948558	0.856123	0.9828	0.959463	0.886839	0.986204	0.652432	0.32384	0.880342	0.601851	0.276058	0.856985	0.659903	0.332223	0.883281
100	0.904522	0.802817	0.956605	0.884738	0.76286	0.948228	0.907637	0.80857	0.958093	0.254768	0.0276206	0.804475	0.21666	0.0225233	0.768515	0.262008	0.0285299	0.811034	0.96685	0.900262	0.9895	0.959521	0.877673	0.987392	0.96818	0.9043	0.989897	0.676962	0.331872	0.898386	0.62711	0.282841	0.87762	0.683417	0.339729	0.900567

## Sheet: UA
	BELGIUM									BRUSSELS									FLANDERS									WALLONIA
	Both			Male			Female			Both			Male			Female			Both			Male			Female			Both			Male			Female
Age	mean	lwr	upr	mean	lwr	upr	mean	lwr	upr	mean	lwr	upr	mean	lwr	upr	mean	lwr	upr	mean	lwr	upr	mean	lwr	upr	mean	lwr	upr	mean	lwr	upr	mean	lwr	upr	mean	lwr	upr
ALL	0.176551	0.163668	0.190219	0.149535	0.133094	0.167614	0.201525	0.183139	0.221257	0.16038	0.13531	0.18908	0.13519	0.110327	0.164619	0.183245	0.153801	0.21688	0.165958	0.148454	0.185077	0.140347	0.121569	0.161492	0.189832	0.16738	0.21452	0.201864	0.180886	0.224609	0.171756	0.149081	0.19708	0.229361	0.203029	0.258001
15	0.0870166	0.0490386	0.149774	0.0759434	0.0419474	0.133648	0.09918	0.0558354	0.17011	0.0541592	0.0254646	0.111489	0.0467367	0.0216109	0.0981446	0.0619254	0.0290299	0.127213	0.0736613	0.0389109	0.135084	0.0639331	0.0330973	0.119934	0.0842165	0.0444505	0.153831	0.106933	0.0593168	0.185246	0.0933863	0.0508102	0.165421	0.121798	0.0676077	0.209658
16	0.085266	0.0516093	0.137685	0.0742404	0.0440314	0.122519	0.0970107	0.0586273	0.15635	0.0533183	0.0266347	0.103882	0.0458628	0.0225439	0.0910551	0.0607855	0.0302775	0.118284	0.0704767	0.0397544	0.121927	0.0609832	0.0337048	0.107874	0.0804112	0.0453122	0.138747	0.109735	0.0653589	0.178487	0.0958011	0.0559809	0.15917	0.124847	0.0743765	0.202087
17	0.0835987	0.0540706	0.127086	0.0726198	0.0459986	0.112826	0.094944	0.0612806	0.144258	0.0525345	0.027673	0.097492	0.0450454	0.0233642	0.0850932	0.0597189	0.0313732	0.110747	0.0674965	0.0403169	0.110882	0.05823	0.0340661	0.0977986	0.0768527	0.045854	0.126039	0.112568	0.0713645	0.173127	0.0982423	0.0611158	0.154218	0.127923	0.0810777	0.19606
18	0.0820618	0.0562916	0.118152	0.0711244	0.0477381	0.104708	0.0930349	0.0636509	0.134042	0.0518497	0.0285411	0.0923837	0.0443226	0.0240421	0.080303	0.0587751	0.0322774	0.104673	0.0647809	0.0405226	0.102017	0.0557261	0.0341241	0.0897327	0.0736106	0.0459941	0.115796	0.115397	0.0769581	0.169509	0.100679	0.0658942	0.150861	0.130989	0.0872914	0.191961
19	0.0806996	0.0580991	0.111055	0.0697937	0.0491097	0.0982889	0.0913347	0.0655488	0.125898	0.0513045	0.0292151	0.0885717	0.0437303	0.0245605	0.0766862	0.0580014	0.0329663	0.100081	0.0623806	0.0403177	0.0953178	0.0535148	0.0338431	0.083631	0.0707427	0.0456754	0.10801	0.118183	0.0817055	0.167967	0.103078	0.0699484	0.149377	0.134002	0.0925389	0.190151
20	0.079554	0.0593011	0.105945	0.068665	0.0499697	0.0936653	0.0898913	0.0667693	0.119991	0.0509381	0.0296988	0.0860203	0.0433033	0.0249245	0.0742029	0.0574433	0.0334466	0.0969302	0.0603391	0.039708	0.0906774	0.0516324	0.0332382	0.0793705	0.0682981	0.0449077	0.102563	0.120885	0.0852372	0.168693	0.105402	0.0729682	0.149921	0.136917	0.0964193	0.190833
21	0.0786655	0.0597672	0.102886	0.0677742	0.0502352	0.090851	0.0887514	0.0671783	0.116388	0.0507903	0.0300319	0.0846449	0.0430762	0.0251684	0.0727744	0.0571465	0.0337642	0.0951272	0.0586957	0.0387876	0.0878876	0.0501115	0.0323942	0.0767503	0.0663206	0.0437989	0.0992216	0.12346	0.0874119	0.17158	0.107614	0.0748332	0.152389	0.139687	0.0987854	0.193881
22	0.0780748	0.0595396	0.101756	0.067157	0.0499613	0.0897122	0.0879611	0.0668319	0.114948	0.0509026	0.0302904	0.0843216	0.0430854	0.0253561	0.0722919	0.0571586	0.0340048	0.0945349	0.057489	0.0377288	0.0866665	0.0489839	0.0314553	0.0755187	0.0648531	0.0425434	0.0976686	0.125862	0.088384	0.176161	0.109673	0.0756682	0.156373	0.142262	0.0998125	0.198779
23	0.0778239	0.0588647	0.102226	0.0668501	0.0493522	0.089965	0.0875682	0.0660058	0.115305	0.0513205	0.0305769	0.0849043	0.0433706	0.0255731	0.0726309	0.0575313	0.0342834	0.0949933	0.0567603	0.0367357	0.0867175	0.0482836	0.0305882	0.0754195	0.0639412	0.0413717	0.09757	0.128043	0.0885043	0.181724	0.111537	0.0757643	0.161253	0.14459	0.0998898	0.204744
24	0.0779579	0.05809	0.103872	0.0668935	0.0486839	0.091261	0.0876237	0.065084	0.116993	0.0520954	0.0310086	0.0862455	0.0439771	0.0259179	0.073668	0.0583237	0.0347315	0.0963419	0.0565577	0.0360007	0.0877843	0.0480515	0.0299492	0.0762355	0.0636388	0.0405005	0.0986373	0.129955	0.088163	0.187483	0.113163	0.0754503	0.166335	0.146619	0.0994497	0.210921
25	0.0785271	0.0575405	0.106305	0.0673318	0.0482161	0.0932832	0.0881849	0.0644261	0.119586	0.0532877	0.0317094	0.0882122	0.0449585	0.0264945	0.0752949	0.0596054	0.0354885	0.0984387	0.0569416	0.0356874	0.0896769	0.0483389	0.029672	0.0778076	0.0640133	0.0401141	0.100658	0.131547	0.087691	0.192704	0.114509	0.0750095	0.170963	0.148296	0.0988604	0.216512
26	0.0795892	0.0574725	0.10923	0.0682165	0.0481584	0.0957881	0.0893174	0.0643173	0.12276	0.0549705	0.032809	0.0906975	0.0463805	0.0274129	0.0774273	0.0614609	0.0367002	0.101172	0.0579895	0.0359391	0.0922738	0.0492138	0.0298754	0.0800371	0.0651524	0.040374	0.103498	0.132772	0.0873357	0.196751	0.11553	0.0746551	0.174563	0.149568	0.0983976	0.22083
27	0.0812123	0.0580875	0.112444	0.0696094	0.0486793	0.0986058	0.091099	0.0649828	0.126293	0.0572341	0.0344492	0.0936276	0.0483252	0.0287942	0.0800124	0.0639954	0.0385267	0.104471	0.0598042	0.0369001	0.095515	0.0507668	0.0306801	0.08288	0.0671728	0.0414429	0.107092	0.133582	0.08727	0.199109	0.116186	0.0745368	0.176665	0.150384	0.0982548	0.223321
28	0.0834782	0.0595629	0.115813	0.0715851	0.0499291	0.101629	0.0936233	0.0666219	0.130044	0.060192	0.0367937	0.0969719	0.0508967	0.0307791	0.0830371	0.0673418	0.0411532	0.108314	0.062523	0.0387397	0.0993975	0.0531208	0.03223	0.0863445	0.0702314	0.043513	0.111444	0.133931	0.0876074	0.199396	0.116437	0.0747517	0.176922	0.150696	0.098559	0.223572
29	0.0864866	0.0620791	0.11927	0.0742359	0.0520618	0.10481	0.0970049	0.0694377	0.133941	0.0639883	0.0400379	0.100762	0.0542294	0.0335371	0.0865457	0.07167	0.0448017	0.11275	0.0663304	0.0416787	0.103981	0.056443	0.0347141	0.0904976	0.0745393	0.0468353	0.116626	0.133778	0.0884068	0.197392	0.116246	0.0753478	0.17514	0.150459	0.0993761	0.221347
30	0.0903605	0.0658349	0.122821	0.0776763	0.0552466	0.10817	0.101385	0.0736542	0.138001	0.0688082	0.0444116	0.105132	0.0584977	0.0372698	0.0906777	0.0771989	0.0497343	0.117948	0.0714755	0.0460133	0.109412	0.0609609	0.038388	0.0954889	0.0803823	0.0517477	0.12281	0.133086	0.0896577	0.193089	0.115583	0.0763114	0.171315	0.149633	0.100695	0.216626
31	0.0952035	0.0709685	0.126587	0.0820057	0.059602	0.111829	0.106883	0.0794283	0.142359	0.0748305	0.0500847	0.110382	0.0638749	0.0421329	0.0957152	0.0841415	0.0561489	0.124252	0.0782198	0.0520481	0.115942	0.0669186	0.0435193	0.101563	0.0880601	0.0585988	0.130284	0.13186	0.0912083	0.186904	0.114451	0.077508	0.165837	0.148224	0.102351	0.209851
32	0.100941	0.0772804	0.130819	0.0871627	0.0649637	0.116006	0.113411	0.0865373	0.147284	0.0820206	0.0568525	0.116949	0.0703444	0.0479688	0.102039	0.092461	0.063825	0.132132	0.0865831	0.0597733	0.123834	0.0743498	0.050115	0.10896	0.0975935	0.0673797	0.139332	0.130251	0.0926628	0.180062	0.112986	0.0786047	0.159798	0.146399	0.103913	0.202332
33	0.107427	0.0843464	0.135886	0.0930194	0.0709866	0.121	0.120798	0.0945098	0.153161	0.0902308	0.0641962	0.125409	0.0777871	0.0543617	0.110131	0.101987	0.0722007	0.142178	0.0964613	0.0689139	0.133442	0.0831791	0.0579652	0.117987	0.108858	0.0777794	0.150332	0.128446	0.0935179	0.173916	0.111352	0.0791927	0.154382	0.14436	0.10484	0.195523
34	0.114471	0.0915663	0.142209	0.0994074	0.0771946	0.127131	0.128823	0.102683	0.160426	0.0992204	0.0713988	0.136292	0.0859952	0.0607291	0.120425	0.112437	0.0804992	0.154912	0.10764	0.0789133	0.145175	0.0932308	0.0666282	0.128987	0.121602	0.0891675	0.163713	0.126621	0.0933329	0.169562	0.109705	0.0789311	0.150517	0.142303	0.104655	0.19061
35	0.12183	0.0982961	0.150061	0.106106	0.0830812	0.134575	0.137201	0.110345	0.169349	0.10863	0.0778167	0.149664	0.0946451	0.0665293	0.132951	0.123388	0.0880095	0.170332	0.119748	0.0890055	0.159252	0.104183	0.0754804	0.142121	0.135389	0.100676	0.179679	0.124948	0.0919867	0.167541	0.108195	0.0777433	0.148653	0.140415	0.103222	0.188198
36	0.129199	0.104116	0.159251	0.112834	0.0882951	0.143121	0.145579	0.117013	0.1797	0.117967	0.083151	0.16474	0.103281	0.0714715	0.147005	0.134257	0.0943651	0.187521	0.132225	0.09848	0.175286	0.115531	0.0839125	0.157021	0.149569	0.111492	0.197756	0.123589	0.0898375	0.167684	0.106965	0.0759273	0.148648	0.138875	0.100909	0.188137
37	0.136213	0.108983	0.168957	0.11925	0.0927494	0.152053	0.153535	0.122606	0.190572	0.126609	0.0874329	0.179878	0.111313	0.0755216	0.161111	0.144311	0.0995411	0.20464	0.144313	0.106915	0.19198	0.126576	0.0915153	0.172518	0.163267	0.121118	0.216472	0.122701	0.0875792	0.169295	0.106151	0.0740433	0.149928	0.137856	0.0984578	0.189702
38	0.142454	0.11311	0.177883	0.124958	0.096554	0.160237	0.160586	0.127319	0.200547	0.133833	0.0908267	0.192881	0.118047	0.0787612	0.173243	0.152698	0.103659	0.21926	0.155076	0.114163	0.207221	0.136441	0.0980883	0.186685	0.175417	0.129355	0.233482	0.122443	0.0859606	0.171503	0.105892	0.0727023	0.151753	0.137531	0.0966856	0.191965
39	0.147465	0.116755	0.184565	0.129526	0.0998697	0.166361	0.166208	0.131402	0.208026	0.138862	0.0934731	0.201395	0.122731	0.0812625	0.181187	0.158509	0.106823	0.228798	0.163463	0.120172	0.218476	0.144128	0.103517	0.197167	0.18483	0.136113	0.246018	0.122976	0.0856378	0.173506	0.106329	0.0724494	0.153432	0.138079	0.0963167	0.194061
40	0.150892	0.120081	0.187919	0.132613	0.102802	0.169435	0.169999	0.13501	0.211835	0.14115	0.0954568	0.203788	0.124827	0.0830655	0.183386	0.161105	0.109089	0.23148	0.168617	0.124893	0.223734	0.148816	0.107706	0.202063	0.190547	0.141308	0.25191	0.12444	0.0870653	0.174786	0.107584	0.0736685	0.154509	0.13965	0.097853	0.195433
41	0.152864	0.123097	0.188284	0.134336	0.105367	0.169759	0.172112	0.138156	0.212358	0.141072	0.0969158	0.200872	0.124679	0.0842946	0.180594	0.160921	0.110619	0.228228	0.170657	0.128371	0.223303	0.150602	0.110692	0.20164	0.192721	0.144996	0.251533	0.126828	0.090191	0.175478	0.109656	0.0763209	0.155105	0.142241	0.101236	0.196228
42	0.153677	0.125645	0.186629	0.134972	0.107455	0.168207	0.17289	0.140682	0.210665	0.139319	0.097928	0.194435	0.122932	0.0850352	0.174498	0.158759	0.111524	0.221025	0.170087	0.130565	0.218565	0.149958	0.112459	0.197184	0.191938	0.147155	0.246412	0.130113	0.0947856	0.176048	0.112522	0.0802201	0.155631	0.14582	0.106205	0.196954
43	0.153657	0.127448	0.18412	0.134827	0.108874	0.165816	0.172713	0.142322	0.208021	0.13662	0.0985093	0.186426	0.120275	0.0853243	0.16693	0.155465	0.111852	0.212024	0.167518	0.131339	0.211241	0.14746	0.112923	0.190294	0.188896	0.147664	0.23842	0.134275	0.100536	0.177106	0.116172	0.085112	0.156626	0.150366	0.112409	0.198278
44	0.153147	0.128217	0.181913	0.134225	0.109438	0.163594	0.171975	0.142818	0.205657	0.133687	0.0986676	0.178671	0.117375	0.0851991	0.159583	0.151863	0.111655	0.203238	0.1636	0.130536	0.203083	0.143723	0.112003	0.182579	0.184336	0.146402	0.229457	0.1393	0.107026	0.17935	0.120599	0.0906622	0.158696	0.155867	0.119388	0.200949
45	0.15249	0.127863	0.180877	0.133488	0.109121	0.162306	0.171072	0.142146	0.204482	0.131187	0.0984992	0.172645	0.114855	0.0847803	0.153805	0.148727	0.111092	0.196295	0.158976	0.128146	0.19556	0.139353	0.109751	0.175368	0.178989	0.143416	0.221109	0.145178	0.113781	0.183445	0.125803	0.0964933	0.162415	0.162312	0.126639	0.205667
46	0.152028	0.126717	0.181346	0.132936	0.108203	0.162294	0.170396	0.140702	0.204861	0.12975	0.0983258	0.169332	0.113292	0.0843796	0.150483	0.14678	0.110572	0.192281	0.15425	0.124516	0.189548	0.134916	0.106507	0.169465	0.173544	0.139138	0.21434	0.151899	0.120431	0.189815	0.131784	0.102315	0.168152	0.169692	0.133795	0.212852
47	0.1521	0.125502	0.183153	0.132885	0.107263	0.163505	0.170332	0.139261	0.206671	0.129996	0.0987853	0.169215	0.113251	0.084565	0.150074	0.146729	0.110828	0.191751	0.149975	0.120433	0.185238	0.130922	0.102946	0.165101	0.16863	0.134444	0.209404	0.159451	0.126942	0.198394	0.138541	0.108095	0.175873	0.177994	0.140847	0.222403
48	0.153046	0.125094	0.185916	0.133651	0.107019	0.165682	0.171272	0.138747	0.209567	0.132591	0.100798	0.172487	0.115338	0.0861284	0.152797	0.149328	0.11288	0.194959	0.146655	0.116921	0.18239	0.127833	0.0999222	0.162135	0.164819	0.130437	0.206117	0.167814	0.133688	0.208555	0.146071	0.114128	0.185085	0.187202	0.148207	0.233642
49	0.155226	0.126344	0.189279	0.135571	0.108192	0.168569	0.173624	0.140066	0.213229	0.138339	0.105472	0.179393	0.120282	0.0900115	0.158955	0.155474	0.117934	0.202224	0.144764	0.114966	0.180709	0.12608	0.0982703	0.160361	0.162655	0.128181	0.204229	0.176961	0.14131	0.219309	0.15436	0.120936	0.194974	0.197286	0.156551	0.245535
50	0.158911	0.129854	0.193028	0.1389	0.111304	0.172014	0.177696	0.143857	0.217472	0.148022	0.113746	0.190409	0.128812	0.0970094	0.169088	0.166028	0.127001	0.214106	0.144631	0.115196	0.180055	0.125963	0.098529	0.159683	0.16251	0.12835	0.203638	0.186825	0.150374	0.229724	0.163365	0.128983	0.204758	0.208179	0.166465	0.257122
51	0.16392	0.135382	0.197103	0.143476	0.116156	0.175943	0.183278	0.149844	0.222221	0.161565	0.125308	0.205844	0.140887	0.106848	0.183542	0.180868	0.139692	0.230922	0.146022	0.117256	0.180403	0.127265	0.100396	0.160045	0.164118	0.130546	0.204296	0.197223	0.160759	0.239596	0.172923	0.138167	0.21425	0.219671	0.177798	0.268188
52	0.169941	0.142343	0.201633	0.149016	0.122248	0.180441	0.190014	0.157383	0.227583	0.178592	0.139168	0.226248	0.156213	0.118695	0.20286	0.199532	0.154881	0.2532	0.148591	0.12044	0.181961	0.129666	0.103272	0.16159	0.167082	0.134001	0.206382	0.207905	0.171854	0.249241	0.182807	0.147964	0.223701	0.231479	0.18989	0.279038
53	0.176635	0.149965	0.206893	0.155211	0.128928	0.18571	0.197517	0.165651	0.233797	0.198525	0.153994	0.252095	0.174316	0.131461	0.227482	0.221338	0.171094	0.28133	0.151997	0.123943	0.185061	0.132854	0.106475	0.164565	0.171009	0.137861	0.210184	0.218578	0.18272	0.259241	0.192746	0.157586	0.233575	0.243275	0.201763	0.290223
54	0.183616	0.15733	0.213182	0.161706	0.135437	0.191939	0.205353	0.173704	0.241086	0.220464	0.168492	0.28301	0.194418	0.144077	0.257066	0.245253	0.186922	0.314742	0.155885	0.127005	0.189904	0.136502	0.109355	0.169109	0.175492	0.141329	0.215837	0.228912	0.192306	0.270155	0.202425	0.166161	0.244284	0.254691	0.212343	0.302244
55	0.190451	0.163597	0.220551	0.168097	0.141082	0.199087	0.21303	0.180683	0.249406	0.243118	0.181726	0.31721	0.215359	0.15573	0.289978	0.269835	0.201349	0.351367	0.159873	0.129148	0.196261	0.140256	0.111478	0.175001	0.180095	0.143887	0.22304	0.23854	0.199847	0.282083	0.211493	0.173049	0.255834	0.265322	0.220834	0.315146
56	0.196657	0.16829	0.228493	0.173928	0.14544	0.206647	0.220007	0.186068	0.258174	0.264814	0.193085	0.35158	0.23558	0.165834	0.323289	0.293259	0.213715	0.387806	0.163548	0.130276	0.20333	0.143729	0.11272	0.181523	0.184343	0.145387	0.230917	0.247071	0.205173	0.294355	0.219568	0.178069	0.26759	0.274736	0.227011	0.328234
57	0.201714	0.171376	0.235893	0.178702	0.148418	0.213614	0.2257	0.189744	0.266231	0.283587	0.20208	0.382221	0.2532	0.173894	0.35321	0.313425	0.223487	0.41998	0.166466	0.130558	0.209867	0.146503	0.113184	0.187556	0.187729	0.145946	0.238138	0.254099	0.208628	0.305652	0.226252	0.18145	0.278355	0.282492	0.231158	0.340182
58	0.205079	0.173062	0.24129	0.181899	0.150116	0.218679	0.229503	0.19184	0.27207	0.297326	0.208206	0.405078	0.266162	0.179401	0.375673	0.328115	0.23012	0.443786	0.168169	0.13023	0.214437	0.148143	0.113045	0.191781	0.189728	0.145772	0.243165	0.259218	0.210754	0.314387	0.231143	0.183601	0.286673	0.288146	0.233782	0.349387
59	0.206367	0.173619	0.243473	0.183146	0.150716	0.22074	0.230984	0.192582	0.274441	0.304398	0.211108	0.417115	0.272841	0.181995	0.387549	0.335638	0.233229	0.456256	0.168333	0.129514	0.215901	0.148339	0.112483	0.193139	0.189967	0.145076	0.244772	0.262158	0.212056	0.3193	0.233968	0.18493	0.291362	0.291403	0.235387	0.354569
60	0.205834	0.173401	0.242555	0.182673	0.150525	0.21991	0.230423	0.19235	0.27348	0.305156	0.211181	0.418749	0.273525	0.182018	0.38915	0.336406	0.233248	0.45794	0.167188	0.128658	0.214417	0.1473	0.111718	0.191768	0.188701	0.144131	0.243137	0.263172	0.212889	0.320496	0.234954	0.185747	0.292513	0.292538	0.236355	0.355853
61	0.203923	0.172656	0.239216	0.180892	0.149774	0.216826	0.228306	0.191428	0.269917	0.300644	0.20897	0.411609	0.269198	0.179964	0.382065	0.331539	0.230773	0.450535	0.165114	0.12782	0.210662	0.145377	0.110904	0.188297	0.186355	0.143126	0.238999	0.262669	0.213427	0.31867	0.23448	0.186217	0.290783	0.291993	0.23689	0.353969
62	0.201091	0.171525	0.234312	0.178227	0.148605	0.21228	0.225134	0.189987	0.26466	0.292052	0.204984	0.397607	0.261006	0.176303	0.368213	0.322287	0.226358	0.43596	0.162497	0.127088	0.20545	0.142926	0.110123	0.183485	0.183361	0.142168	0.233244	0.261078	0.213732	0.314714	0.232948	0.186407	0.287011	0.290228	0.23707	0.349841
63	0.197789	0.17008	0.228768	0.175099	0.147106	0.207124	0.221405	0.188133	0.258686	0.280622	0.1997	0.378814	0.25015	0.171478	0.349683	0.309951	0.220519	0.416282	0.159709	0.126503	0.199639	0.14029	0.109421	0.178126	0.180137	0.141317	0.226803	0.258832	0.2138	0.309612	0.230765	0.186329	0.282125	0.28771	0.236906	0.344491
64	0.194453	0.168361	0.223503	0.171913	0.14535	0.202182	0.217599	0.185953	0.252957	0.267578	0.193558	0.357361	0.237807	0.165899	0.328605	0.295821	0.213735	0.393649	0.157104	0.126084	0.194063	0.137797	0.108824	0.172986	0.177081	0.140611	0.220583	0.256358	0.213599	0.304365	0.228334	0.185978	0.277053	0.2849	0.236386	0.338951
65	0.191499	0.166442	0.219335	0.169053	0.143442	0.198178	0.214175	0.183577	0.248321	0.254067	0.186969	0.335313	0.225068	0.159948	0.307012	0.281121	0.206456	0.370192	0.15502	0.125851	0.189484	0.135753	0.108366	0.168752	0.174572	0.140096	0.215409	0.254078	0.213125	0.299901	0.226045	0.185375	0.272652	0.282252	0.23554	0.334179
66	0.189323	0.164524	0.216891	0.166882	0.141586	0.195666	0.211572	0.181261	0.245432	0.241118	0.180336	0.314526	0.212897	0.153999	0.286688	0.266962	0.199125	0.347872	0.15378	0.12588	0.186544	0.134452	0.10813	0.165991	0.172975	0.139878	0.211972	0.2524	0.212484	0.296987	0.224282	0.184639	0.269623	0.28021	0.234512	0.330961
67	0.188314	0.162997	0.216544	0.165753	0.140127	0.195002	0.210218	0.179435	0.244707	0.229631	0.174102	0.296514	0.202115	0.148445	0.269059	0.254327	0.192225	0.328338	0.153708	0.126356	0.185722	0.134187	0.108295	0.165124	0.172648	0.14018	0.210793	0.251731	0.211971	0.296145	0.223419	0.184038	0.268455	0.279209	0.233643	0.329837
68	0.188864	0.162434	0.218472	0.166024	0.13954	0.196386	0.210543	0.178689	0.246372	0.220381	0.168794	0.28238	0.19342	0.143746	0.255144	0.244072	0.186331	0.312827	0.155146	0.127622	0.187331	0.135263	0.10917	0.166428	0.173971	0.141379	0.212219	0.252477	0.212095	0.297643	0.223833	0.184016	0.269421	0.279689	0.23348	0.331094
69	0.191318	0.163425	0.222704	0.168005	0.140313	0.199891	0.21292	0.179625	0.2505	0.213907	0.164948	0.272653	0.187281	0.140352	0.245421	0.236798	0.182024	0.30197	0.158409	0.130118	0.191496	0.137964	0.111134	0.170031	0.177286	0.143942	0.216401	0.254985	0.213448	0.301508	0.225843	0.185079	0.272583	0.282018	0.234642	0.334776
70	0.195752	0.166233	0.229073	0.171765	0.14266	0.205385	0.217422	0.182504	0.256921	0.21012	0.162693	0.266964	0.183597	0.138357	0.239518	0.232419	0.179437	0.295412	0.163602	0.134112	0.198094	0.142381	0.11441	0.175833	0.182695	0.148136	0.223204	0.259314	0.216314	0.307508	0.229502	0.187465	0.277744	0.286251	0.237413	0.340647
71	0.202209	0.171009	0.23747	0.177342	0.146707	0.212778	0.22408	0.187468	0.265507	0.208843	0.162052	0.264873	0.182191	0.137765	0.237006	0.230745	0.178591	0.292702	0.170814	0.139806	0.207044	0.148596	0.119167	0.183777	0.19028	0.154166	0.232528	0.265467	0.220835	0.315468	0.234816	0.191294	0.284754	0.29238	0.241927	0.348518
72	0.210766	0.177892	0.247883	0.184811	0.152578	0.22207	0.23296	0.194651	0.276223	0.209964	0.16305	0.266085	0.182953	0.138589	0.237601	0.231652	0.179506	0.293528	0.180178	0.14741	0.218364	0.156734	0.125583	0.193899	0.200164	0.162237	0.244371	0.273466	0.227095	0.325322	0.241809	0.196644	0.293558	0.300415	0.248259	0.358305
73	0.221535	0.18703	0.260367	0.194283	0.160408	0.233324	0.244161	0.204197	0.289105	0.213434	0.16571	0.270447	0.185833	0.140848	0.241152	0.235078	0.182203	0.297711	0.19187	0.157142	0.232159	0.166964	0.133854	0.206314	0.212514	0.172567	0.258816	0.283349	0.235136	0.337091	0.250524	0.203559	0.304186	0.310376	0.256444	0.370008
74	0.234655	0.198579	0.275036	0.205898	0.170347	0.246661	0.257803	0.216253	0.304238	0.219257	0.170056	0.277926	0.190835	0.144563	0.247631	0.241014	0.186701	0.305197	0.206104	0.169232	0.248606	0.179495	0.144191	0.22121	0.22753	0.185384	0.276012	0.295163	0.244962	0.350871	0.261015	0.212053	0.316737	0.322296	0.266471	0.383699
75	0.250285	0.212699	0.292049	0.219821	0.182556	0.262253	0.274025	0.230965	0.321755	0.227484	0.176107	0.288599	0.198013	0.149757	0.257117	0.249497	0.193013	0.316036	0.223123	0.183915	0.267945	0.194572	0.15682	0.238839	0.245435	0.200914	0.296165	0.308962	0.256532	0.36682	0.273347	0.222106	0.331373	0.336206	0.278286	0.399508
76	0.268594	0.229533	0.311615	0.236237	0.197187	0.280319	0.292969	0.248459	0.341826	0.238209	0.183882	0.302635	0.207463	0.156454	0.269783	0.260605	0.201149	0.330367	0.243187	0.201416	0.29047	0.212468	0.171971	0.259513	0.266462	0.219369	0.319526	0.324797	0.269755	0.385146	0.287589	0.233658	0.34831	0.352137	0.291786	0.41761
77	0.289747	0.249178	0.333984	0.255336	0.214372	0.301128	0.314765	0.268812	0.364656	0.251558	0.193392	0.320272	0.219318	0.16468	0.28588	0.274446	0.211112	0.348388	0.266556	0.221919	0.316518	0.233472	0.189858	0.283598	0.290832	0.240911	0.346376	0.342712	0.284493	0.406083	0.303809	0.246612	0.367797	0.370106	0.306814	0.438201
78	0.313887	0.271652	0.359448	0.277305	0.234188	0.324993	0.339516	0.292018	0.390479	0.267677	0.204644	0.341782	0.233742	0.174458	0.305712	0.291143	0.222898	0.370326	0.293463	0.245541	0.346443	0.257867	0.210651	0.31149	0.318728	0.265628	0.376993	0.362734	0.300567	0.429858	0.322066	0.26083	0.390092	0.390114	0.323171	0.46147
79	0.341115	0.296864	0.388319	0.302304	0.256633	0.352251	0.367273	0.317957	0.419533	0.286726	0.217644	0.367437	0.250919	0.185813	0.329603	0.310827	0.236497	0.39639	0.324083	0.272297	0.380568	0.285906	0.234453	0.343582	0.350261	0.293495	0.411611	0.384864	0.317772	0.45664	0.3424	0.276154	0.415419	0.412133	0.34063	0.487547
80	0.37146	0.324594	0.420876	0.330444	0.281613	0.383226	0.398011	0.346382	0.452013	0.308852	0.232393	0.397441	0.271037	0.19877	0.357843	0.333609	0.251896	0.42671	0.358491	0.302087	0.419102	0.317772	0.261279	0.380194	0.385429	0.324358	0.450334	0.409066	0.335906	0.486487	0.364828	0.29242	0.443917	0.436099	0.358966	0.516454
81	0.404857	0.354521	0.457277	0.361763	0.308937	0.418156	0.431605	0.376934	0.487996	0.334175	0.248898	0.431869	0.294273	0.213362	0.39063	0.359563	0.26908	0.461271	0.396613	0.334694	0.462032	0.353536	0.291044	0.42147	0.424074	0.357942	0.493042	0.435259	0.354794	0.519286	0.389328	0.309482	0.475587	0.461905	0.377975	0.548052
82	0.441114	0.386263	0.497441	0.396191	0.33835	0.457089	0.467808	0.409185	0.527333	0.362756	0.267164	0.470589	0.320768	0.229622	0.427994	0.3887	0.288036	0.499845	0.438189	0.369812	0.508998	0.393105	0.323574	0.467257	0.465849	0.39387	0.539279	0.463308	0.374294	0.554724	0.415834	0.327218	0.510248	0.489393	0.397496	0.582012
83	0.479897	0.419444	0.540945	0.433527	0.369568	0.49978	0.506235	0.442706	0.569563	0.394573	0.287196	0.513192	0.3506	0.247589	0.469715	0.420934	0.308745	0.541929	0.482734	0.407066	0.559203	0.436179	0.358618	0.516993	0.510192	0.4317	0.588186	0.493018	0.394306	0.592277	0.444225	0.345543	0.547512	0.518349	0.41741	0.617811
84	0.520717	0.45372	0.586978	0.473416	0.402309	0.545619	0.546362	0.477102	0.613872	0.429483	0.308991	0.558954	0.383749	0.267296	0.515258	0.456062	0.331181	0.586724	0.52953	0.446033	0.611407	0.482215	0.395858	0.569647	0.556333	0.47095	0.638513	0.524129	0.414757	0.631235	0.474316	0.364393	0.586785	0.548505	0.437634	0.654762
85	0.562937	0.488776	0.634388	0.51534	0.436294	0.593626	0.587538	0.51202	0.659148	0.467202	0.332529	0.60683	0.420065	0.288768	0.563742	0.493739	0.355298	0.633148	0.577645	0.486246	0.66402	0.530425	0.434915	0.623757	0.603319	0.51111	0.688727	0.556322	0.43559	0.67075	0.50586	0.383724	0.6273	0.579544	0.458107	0.692061
86	0.6058	0.524306	0.681806	0.558627	0.471242	0.642526	0.629019	0.547137	0.704102	0.507286	0.357768	0.655511	0.459244	0.31201	0.613955	0.533469	0.381027	0.679907	0.625992	0.527194	0.715294	0.579802	0.475344	0.67757	0.650087	0.551651	0.737207	0.589224	0.456754	0.709908	0.538546	0.403499	0.668162	0.611103	0.478778	0.728859
87	0.648475	0.55999	0.727815	0.602485	0.506852	0.690882	0.670013	0.582134	0.74743	0.549128	0.384629	0.703546	0.500806	0.336999	0.664441	0.57461	0.408263	0.725622	0.673417	0.568328	0.763566	0.629189	0.516636	0.729268	0.695551	0.592026	0.78246	0.62242	0.478196	0.747804	0.572005	0.42368	0.708427	0.642791	0.499599	0.764336
88	0.690116	0.595486	0.771118	0.646048	0.542792	0.737271	0.709741	0.616691	0.78797	0.591981	0.412991	0.749498	0.544099	0.363674	0.713647	0.616405	0.436862	0.768977	0.718808	0.609076	0.807475	0.677384	0.558231	0.777225	0.738703	0.63169	0.82332	0.655473	0.499855	0.78363	0.605827	0.444224	0.747183	0.674205	0.520519	0.797769
89	0.729931	0.630438	0.810683	0.688446	0.578703	0.780447	0.747492	0.650484	0.824826	0.634997	0.442687	0.792111	0.588324	0.391932	0.76011	0.658024	0.466634	0.808867	0.761201	0.648866	0.84612	0.723252	0.599536	0.82021	0.778701	0.670119	0.85906	0.687946	0.521663	0.816731	0.639572	0.465078	0.783627	0.704947	0.541478	0.828587
90	0.767242	0.66449	0.845826	0.728872	0.614206	0.819474	0.782675	0.683201	0.857433	0.67729	0.473503	0.830444	0.632583	0.421618	0.802622	0.698628	0.49735	0.844507	0.799859	0.687159	0.879101	0.765836	0.639952	0.857507	0.814936	0.706835	0.889412	0.719421	0.543543	0.84665	0.672798	0.486182	0.81713	0.734647	0.562412	0.8564
91	0.801527	0.697302	0.876235	0.766646	0.648923	0.853789	0.814857	0.714549	0.885562	0.718004	0.505178	0.863946	0.675946	0.452527	0.840354	0.737432	0.528734	0.875475	0.834319	0.723482	0.906473	0.804434	0.678915	0.888914	0.847057	0.741432	0.91451	0.749523	0.565408	0.873139	0.705079	0.507465	0.847269	0.762976	0.583249	0.881007
92	0.832449	0.728567	0.901926	0.801257	0.68249	0.883202	0.843775	0.744273	0.90928	0.756385	0.537411	0.892449	0.717529	0.484406	0.872903	0.773766	0.560484	0.901701	0.864395	0.757445	0.928631	0.838638	0.715925	0.914661	0.874965	0.773594	0.934775	0.777938	0.587168	0.896145	0.736029	0.52885	0.873839	0.789662	0.603913	0.902383
93	0.859855	0.758033	0.923173	0.832387	0.714579	0.90784	0.869331	0.772167	0.928874	0.791834	0.569872	0.916116	0.756569	0.516957	0.900255	0.807122	0.592274	0.9234	0.890141	0.788768	0.946183	0.86832	0.750573	0.935275	0.898771	0.803104	0.950803	0.804422	0.60873	0.91578	0.76532	0.55025	0.896827	0.814502	0.624326	0.920643
94	0.883756	0.785502	0.940418	0.859904	0.744914	0.928063	0.891573	0.798081	0.944772	0.82394	0.602214	0.935345	0.792472	0.549849	0.922708	0.837174	0.623768	0.940985	0.911802	0.817278	0.959831	0.893594	0.782558	0.951448	0.918748	0.829849	0.963256	0.828808	0.629998	0.932277	0.792694	0.571577	0.916384	0.837358	0.644409	0.936007
95	0.904298	0.810846	0.954188	0.883845	0.773279	0.94437	0.910664	0.821922	0.957472	0.852491	0.63409	0.950675	0.824851	0.582728	0.940764	0.863778	0.654638	0.95498	0.929748	0.84291	0.970276	0.914755	0.811697	0.963917	0.935269	0.85381	0.972785	0.851008	0.65088	0.945943	0.817971	0.592739	0.932769	0.858164	0.664086	0.948763
96	0.921723	0.833999	0.965033	0.904379	0.799525	0.957319	0.92685	0.843655	0.967481	0.877454	0.665165	0.962698	0.853525	0.615238	0.955026	0.886953	0.684577	0.965944	0.94442	0.865695	0.978163	0.932213	0.837916	0.973392	0.948761	0.875047	0.979983	0.871002	0.671288	0.957126	0.841049	0.613646	0.946315	0.876913	0.683285	0.959227
97	0.936335	0.854956	0.973472	0.921768	0.82357	0.96747	0.940421	0.863295	0.975281	0.89895	0.695134	0.971996	0.878498	0.647032	0.966123	0.906849	0.71331	0.974419	0.956276	0.885738	0.984053	0.946433	0.86124	0.980505	0.959659	0.89369	0.985363	0.888833	0.69114	0.96618	0.861896	0.634207	0.957383	0.893651	0.701938	0.967724
98	0.948464	0.873763	0.979974	0.93633	0.845395	0.975339	0.951693	0.880903	0.9813	0.917209	0.723735	0.979102	0.899925	0.67779	0.974646	0.92371	0.740607	0.980896	0.965764	0.903207	0.98841	0.957888	0.881774	0.98579	0.968381	0.909911	0.989347	0.904593	0.710362	0.973443	0.880546	0.654337	0.966335	0.908468	0.719983	0.974562
99	0.958446	0.89051	0.984942	0.948407	0.865036	0.981386	0.960978	0.896574	0.985907	0.932535	0.750752	0.98448	0.918067	0.707231	0.981123	0.937838	0.766286	0.9858	0.973295	0.918304	0.991609	0.967033	0.899684	0.989684	0.975306	0.923917	0.992275	0.91841	0.72889	0.979222	0.897082	0.673957	0.973514	0.921484	0.737371	0.980023
100	0.966599	0.905315	0.988712	0.958341	0.882573	0.985996	0.968571	0.910428	0.989411	0.945266	0.776027	0.988517	0.933252	0.735124	0.986002	0.94956	0.79022	0.989483	0.97923	0.931258	0.993942	0.974276	0.915178	0.992535	0.980768	0.935927	0.994415	0.930435	0.746669	0.983791	0.911627	0.692996	0.979228	0.932838	0.754055	0.984356

## Sheet: PD
	BELGIUM									BRUSSELS									FLANDERS									WALLONIA
	Both			Male			Female			Both			Male			Female			Both			Male			Female			Both			Male			Female
Age	mean	lwr	upr	mean	lwr	upr	mean	lwr	upr	mean	lwr	upr	mean	lwr	upr	mean	lwr	upr	mean	lwr	upr	mean	lwr	upr	mean	lwr	upr	mean	lwr	upr	mean	lwr	upr	mean	lwr	upr
ALL	0.499506	0.481048	0.517966	0.463941	0.439377	0.488682	0.532381	0.507675	0.55693	0.513393	0.478158	0.548495	0.477507	0.438058	0.517238	0.545965	0.507251	0.584132	0.468471	0.442454	0.494659	0.433173	0.402961	0.463891	0.501375	0.470241	0.532498	0.557931	0.529362	0.586122	0.522588	0.489348	0.555628	0.590208	0.557694	0.621953
15	0.279686	0.235156	0.32902	0.241147	0.198537	0.289598	0.311384	0.260324	0.367484	0.251827	0.177508	0.34424	0.213486	0.1459	0.301334	0.278235	0.19639	0.37814	0.305258	0.237955	0.382054	0.26436	0.201462	0.338571	0.33791	0.263245	0.421633	0.239279	0.185573	0.30275	0.206128	0.157022	0.265749	0.26941	0.209252	0.339439
16	0.286287	0.242754	0.334182	0.248285	0.206398	0.295508	0.317732	0.26791	0.37211	0.260397	0.186928	0.350302	0.222305	0.154933	0.308287	0.286852	0.206232	0.383753	0.309572	0.244028	0.383784	0.269539	0.207992	0.341448	0.341774	0.269195	0.422606	0.249172	0.195777	0.311489	0.216016	0.166849	0.274892	0.279393	0.219841	0.347884
17	0.292978	0.250492	0.339406	0.255559	0.214448	0.301525	0.324148	0.275599	0.3768	0.269149	0.196702	0.356439	0.231375	0.164386	0.31536	0.295623	0.216401	0.389434	0.31392	0.250184	0.385545	0.27478	0.214643	0.344376	0.345661	0.275198	0.423621	0.259328	0.206372	0.320388	0.226236	0.177125	0.284259	0.289595	0.230772	0.356463
18	0.299753	0.258362	0.344694	0.26296	0.222674	0.30765	0.330627	0.283379	0.381558	0.278074	0.20682	0.362651	0.240685	0.174252	0.322552	0.30454	0.226884	0.395189	0.318301	0.256415	0.387343	0.280077	0.221406	0.34736	0.349571	0.281247	0.424686	0.269736	0.217345	0.329441	0.236775	0.187839	0.293847	0.300002	0.242028	0.365174
19	0.306609	0.266352	0.350048	0.270482	0.231059	0.313886	0.337166	0.291238	0.386389	0.287163	0.21727	0.368942	0.250226	0.184521	0.329864	0.313594	0.237662	0.401023	0.322714	0.262714	0.389185	0.285428	0.228266	0.350405	0.353507	0.287335	0.425812	0.280383	0.228681	0.338643	0.247622	0.198977	0.303652	0.310603	0.253586	0.374016
20	0.31354	0.27445	0.355471	0.278116	0.239585	0.320235	0.343763	0.299162	0.391301	0.296406	0.228033	0.375312	0.259986	0.195176	0.337297	0.322775	0.248716	0.406942	0.327159	0.269072	0.391077	0.290829	0.235212	0.353517	0.357469	0.293454	0.427009	0.291255	0.240361	0.347989	0.258761	0.210519	0.313667	0.321384	0.265425	0.382989
21	0.320541	0.282642	0.360964	0.285854	0.248232	0.326701	0.350413	0.307138	0.396299	0.305792	0.239091	0.381765	0.26995	0.206197	0.34485	0.332074	0.260021	0.412951	0.331635	0.275482	0.393026	0.296276	0.242229	0.356704	0.361459	0.299594	0.428287	0.302335	0.25236	0.357474	0.270175	0.222438	0.323889	0.332328	0.277517	0.39209
22	0.327605	0.290915	0.36653	0.293687	0.25698	0.333285	0.357114	0.31515	0.40139	0.315309	0.250418	0.388305	0.280103	0.217559	0.352526	0.341481	0.27155	0.419059	0.336142	0.281933	0.395041	0.301764	0.249301	0.359972	0.365478	0.305746	0.429657	0.313605	0.264652	0.367094	0.281843	0.234707	0.334311	0.34342	0.28983	0.40132
23	0.334727	0.299254	0.372173	0.301603	0.265803	0.339992	0.36386	0.323183	0.406581	0.324945	0.261989	0.394935	0.29043	0.229232	0.360327	0.350984	0.283274	0.425275	0.340679	0.288415	0.397128	0.307289	0.256412	0.363328	0.369527	0.3119	0.43113	0.325048	0.277206	0.376843	0.293744	0.247288	0.344928	0.354644	0.302333	0.410678
24	0.341902	0.307641	0.377895	0.309594	0.274679	0.346824	0.370648	0.33122	0.411878	0.334687	0.27377	0.401661	0.300911	0.241179	0.368257	0.360571	0.295156	0.431607	0.345245	0.294918	0.399298	0.312846	0.263542	0.366781	0.373608	0.318046	0.432718	0.336642	0.289987	0.386716	0.305853	0.260143	0.355733	0.36598	0.314989	0.420162
25	0.349121	0.31606	0.383701	0.317647	0.28358	0.353785	0.377474	0.339246	0.417288	0.34452	0.285728	0.40849	0.311529	0.253361	0.376321	0.370232	0.30716	0.438067	0.349841	0.301429	0.401558	0.318432	0.270672	0.370339	0.377722	0.324172	0.434431	0.348367	0.302958	0.396709	0.318143	0.273226	0.366719	0.37741	0.327759	0.429773
26	0.35638	0.324492	0.389595	0.325752	0.292482	0.360876	0.384334	0.347245	0.422818	0.35443	0.297824	0.41543	0.322262	0.26573	0.384522	0.379953	0.319244	0.444666	0.354464	0.307937	0.403918	0.32404	0.277784	0.37401	0.38187	0.330267	0.436283	0.3602	0.316077	0.406818	0.330588	0.286491	0.377878	0.388914	0.340604	0.43951
27	0.363671	0.33292	0.395579	0.333897	0.301357	0.368099	0.391223	0.355199	0.428472	0.364402	0.310014	0.422489	0.33309	0.278238	0.392869	0.389722	0.331365	0.451418	0.359114	0.314427	0.406388	0.329666	0.284856	0.377802	0.386054	0.336321	0.438284	0.372117	0.329302	0.417037	0.343157	0.299884	0.389203	0.400473	0.353482	0.44937
28	0.370988	0.341324	0.401658	0.342069	0.31018	0.375453	0.398137	0.363095	0.434255	0.374421	0.322254	0.429679	0.34399	0.290829	0.401369	0.399527	0.343477	0.458337	0.363792	0.320887	0.408978	0.335306	0.291867	0.381725	0.390275	0.34232	0.440448	0.384095	0.342586	0.427364	0.35582	0.313354	0.400682	0.412067	0.36635	0.459352
29	0.378323	0.349684	0.407836	0.350257	0.318927	0.382934	0.405072	0.370919	0.440171	0.384471	0.334493	0.437012	0.354939	0.303444	0.410029	0.409353	0.35553	0.465439	0.368495	0.327303	0.411699	0.340953	0.298796	0.385785	0.394534	0.348255	0.442785	0.396109	0.355882	0.437792	0.368544	0.326846	0.412304	0.423674	0.379169	0.469453
30	0.385669	0.357984	0.414115	0.358447	0.327576	0.390539	0.412024	0.378657	0.44622	0.394535	0.34668	0.444503	0.365914	0.316024	0.418857	0.419187	0.367475	0.472738	0.373224	0.333658	0.414562	0.346603	0.305625	0.389989	0.398833	0.354114	0.445306	0.408134	0.369142	0.448317	0.381299	0.340306	0.424055	0.435274	0.391896	0.479666
31	0.39302	0.366204	0.420498	0.366628	0.336107	0.398257	0.418987	0.386301	0.452401	0.404599	0.35876	0.452165	0.376891	0.328507	0.427861	0.429017	0.379263	0.480249	0.377976	0.33994	0.417576	0.352249	0.312333	0.394342	0.403173	0.359887	0.448021	0.420145	0.382319	0.458934	0.394049	0.353681	0.435916	0.446847	0.404495	0.489984
32	0.400368	0.374327	0.426984	0.374785	0.344506	0.406076	0.425958	0.393842	0.458711	0.414645	0.37068	0.460013	0.387846	0.340831	0.437046	0.438829	0.390844	0.487986	0.382753	0.346134	0.420753	0.357888	0.318905	0.398846	0.407555	0.365567	0.450938	0.432118	0.395366	0.469633	0.406763	0.366924	0.447867	0.458371	0.41693	0.500396
33	0.407706	0.38234	0.433573	0.382905	0.35276	0.413979	0.432932	0.401276	0.465144	0.424658	0.382384	0.468062	0.398755	0.352939	0.446414	0.44861	0.402176	0.495958	0.387552	0.352226	0.424102	0.363513	0.325326	0.403502	0.411981	0.371147	0.454064	0.444027	0.40824	0.480405	0.419407	0.379988	0.459882	0.469827	0.429171	0.510888
34	0.415026	0.39023	0.44026	0.390977	0.36086	0.421947	0.439903	0.408602	0.47169	0.43462	0.393823	0.476323	0.409593	0.364778	0.455961	0.458347	0.413217	0.50417	0.392374	0.358205	0.42763	0.369118	0.331585	0.408305	0.416453	0.376624	0.457403	0.455849	0.4209	0.491237	0.431949	0.392836	0.47193	0.481195	0.441192	0.521441
35	0.422322	0.397987	0.447039	0.398986	0.368803	0.429956	0.446869	0.415821	0.478336	0.444517	0.40495	0.484801	0.420337	0.376302	0.465677	0.468026	0.423938	0.512619	0.397216	0.36406	0.431344	0.374699	0.337677	0.413248	0.420971	0.381997	0.460955	0.467559	0.433313	0.502112	0.444357	0.405433	0.483976	0.492456	0.452973	0.532034
36	0.429585	0.405606	0.4539	0.40692	0.376586	0.43798	0.453823	0.422937	0.485069	0.454333	0.415727	0.493496	0.430963	0.387475	0.475544	0.477635	0.434316	0.521294	0.402079	0.369785	0.435246	0.38025	0.343597	0.41832	0.425536	0.387267	0.464719	0.479134	0.445449	0.51301	0.456601	0.417754	0.495983	0.503591	0.464499	0.54264
37	0.43681	0.413083	0.460829	0.414765	0.38421	0.44599	0.460762	0.429955	0.491872	0.464053	0.426127	0.502398	0.44145	0.39827	0.485533	0.487162	0.444338	0.530174	0.406961	0.375375	0.439336	0.385764	0.349347	0.423506	0.430151	0.392442	0.468688	0.490553	0.457286	0.523904	0.468649	0.429776	0.507907	0.514583	0.47576	0.553231
38	0.443988	0.42042	0.467812	0.42251	0.391678	0.453958	0.467681	0.436885	0.498726	0.47366	0.436134	0.511487	0.451773	0.408673	0.495609	0.496594	0.454006	0.539232	0.411862	0.380831	0.44361	0.391237	0.354932	0.428787	0.434816	0.397529	0.472855	0.501794	0.468806	0.534766	0.480475	0.441484	0.519704	0.525414	0.486752	0.563774
39	0.451114	0.427617	0.47483	0.430142	0.398994	0.461852	0.474576	0.443735	0.505612	0.483143	0.445744	0.520731	0.461913	0.418678	0.505727	0.505921	0.463328	0.548428	0.416781	0.386157	0.448061	0.396663	0.36036	0.434141	0.439532	0.402541	0.477207	0.512837	0.479999	0.545563	0.49205	0.452868	0.531331	0.536069	0.497474	0.574237
40	0.458179	0.434682	0.481862	0.437648	0.406163	0.469643	0.481442	0.450516	0.512511	0.492485	0.454966	0.530089	0.471848	0.42829	0.515839	0.51513	0.47232	0.557718	0.421716	0.39136	0.452676	0.402036	0.36564	0.439544	0.444301	0.407493	0.481731	0.523663	0.490862	0.55626	0.503351	0.463919	0.542741	0.546532	0.507928	0.584585
41	0.465177	0.441621	0.488889	0.445016	0.413187	0.477303	0.488275	0.457237	0.519403	0.501675	0.463815	0.539514	0.481559	0.437517	0.525889	0.524211	0.481007	0.567056	0.426667	0.396451	0.457441	0.40735	0.370786	0.444971	0.449124	0.4124	0.48641	0.534254	0.501392	0.566821	0.514353	0.474632	0.553893	0.55679	0.518118	0.594786
42	0.472101	0.448442	0.495887	0.452236	0.420073	0.484804	0.495071	0.46391	0.526269	0.510698	0.472317	0.548954	0.491028	0.446375	0.535823	0.533154	0.489414	0.576391	0.431633	0.401445	0.462338	0.412602	0.37581	0.450396	0.454002	0.417282	0.491228	0.544595	0.511593	0.577209	0.525034	0.485005	0.564743	0.566829	0.52805	0.604807
43	0.478946	0.455152	0.502837	0.459296	0.426822	0.49212	0.501825	0.470544	0.533091	0.519545	0.480497	0.558356	0.500236	0.45488	0.545589	0.54195	0.49757	0.585674	0.436613	0.406358	0.467347	0.417784	0.380726	0.455794	0.458936	0.422157	0.496167	0.554669	0.521469	0.587389	0.535375	0.495036	0.575256	0.576638	0.53773	0.614617
44	0.485705	0.461759	0.509716	0.466185	0.433438	0.499226	0.508533	0.477147	0.539853	0.528203	0.488383	0.567666	0.509169	0.463048	0.555133	0.550589	0.505501	0.594861	0.441605	0.411207	0.472448	0.422891	0.385547	0.461138	0.463927	0.427045	0.501208	0.564464	0.531026	0.597326	0.545357	0.504722	0.585397	0.586205	0.547166	0.624191
45	0.492371	0.468272	0.516506	0.472893	0.439922	0.506101	0.515192	0.483728	0.546537	0.536661	0.496002	0.576838	0.517809	0.470896	0.564411	0.559063	0.513232	0.603909	0.44661	0.416012	0.477619	0.427919	0.390287	0.466405	0.468976	0.431962	0.506335	0.573967	0.540269	0.606991	0.554964	0.514062	0.595135	0.595522	0.556361	0.633503
46	0.498939	0.474695	0.523188	0.479409	0.446275	0.512725	0.521798	0.490292	0.553132	0.54491	0.503379	0.585825	0.526144	0.478438	0.573378	0.567363	0.520786	0.612779	0.451626	0.420788	0.48284	0.432862	0.394955	0.471572	0.474085	0.436927	0.511531	0.583166	0.549206	0.616356	0.564182	0.523053	0.604446	0.604579	0.565322	0.642531
47	0.505403	0.481034	0.529745	0.485724	0.452494	0.51908	0.528346	0.496844	0.559625	0.55294	0.510534	0.594589	0.53416	0.485685	0.581999	0.575483	0.528184	0.621439	0.456652	0.425553	0.488092	0.437715	0.399563	0.476619	0.479253	0.441957	0.516781	0.592053	0.55784	0.625396	0.572997	0.531694	0.613306	0.613368	0.574053	0.651259
48	0.511757	0.487294	0.536164	0.491828	0.458578	0.525151	0.534834	0.503389	0.566005	0.560744	0.517487	0.603096	0.541845	0.492648	0.59024	0.583416	0.53544	0.629862	0.461686	0.430323	0.493356	0.442473	0.404117	0.481527	0.484482	0.447066	0.522073	0.600617	0.566176	0.634092	0.581397	0.53998	0.621697	0.621884	0.582555	0.659671
49	0.517997	0.493477	0.542431	0.497713	0.464523	0.530924	0.541257	0.509927	0.572265	0.568312	0.524252	0.611317	0.549188	0.499333	0.598074	0.591155	0.54257	0.638023	0.466729	0.435112	0.498616	0.447131	0.408625	0.486281	0.489773	0.452267	0.527394	0.608853	0.574217	0.642425	0.589373	0.547907	0.629607	0.630119	0.590831	0.667757
50	0.524118	0.499583	0.548537	0.503373	0.470323	0.536392	0.547613	0.516459	0.578399	0.575641	0.530843	0.619229	0.55618	0.505746	0.605483	0.598697	0.549583	0.645906	0.471779	0.439931	0.503858	0.451685	0.413091	0.490868	0.495125	0.45757	0.532735	0.616754	0.581967	0.650386	0.596918	0.555472	0.637026	0.638072	0.598882	0.675509
51	0.53012	0.505614	0.554481	0.508807	0.475977	0.541561	0.553901	0.52298	0.58441	0.582731	0.537271	0.626827	0.562827	0.511897	0.612466	0.606042	0.556488	0.653507	0.476834	0.444787	0.509073	0.456134	0.417517	0.495286	0.500537	0.462977	0.538092	0.624328	0.589434	0.657976	0.604041	0.562678	0.643968	0.645747	0.60671	0.682934
52	0.536003	0.51157	0.560265	0.514019	0.48148	0.546441	0.560119	0.529485	0.590302	0.589586	0.543547	0.634108	0.569134	0.517793	0.619031	0.613193	0.563291	0.660827	0.481895	0.449685	0.514256	0.460481	0.421903	0.499539	0.506007	0.468486	0.54346	0.631581	0.596627	0.665205	0.610752	0.569532	0.650448	0.653149	0.61432	0.690041
53	0.54177	0.517447	0.565895	0.519014	0.486826	0.551044	0.566269	0.535967	0.596083	0.596212	0.549679	0.641076	0.57511	0.523442	0.625187	0.620153	0.569995	0.66787	0.486959	0.454625	0.519403	0.464725	0.426245	0.50363	0.511532	0.474095	0.548839	0.638522	0.603554	0.672082	0.617063	0.576038	0.656486	0.660286	0.621714	0.696844
54	0.54742	0.523243	0.571376	0.523793	0.492008	0.555387	0.572348	0.542415	0.601761	0.602612	0.555674	0.647735	0.580762	0.528847	0.630949	0.626926	0.576602	0.674644	0.492027	0.459609	0.524512	0.468869	0.43054	0.507568	0.517109	0.479798	0.554231	0.645161	0.61022	0.678619	0.622986	0.582197	0.662104	0.667165	0.62889	0.703355
55	0.552956	0.528952	0.576715	0.528362	0.497015	0.559487	0.578358	0.548818	0.607347	0.608792	0.561535	0.654094	0.586098	0.534009	0.636329	0.633514	0.58311	0.681156	0.497096	0.464633	0.529583	0.472912	0.434781	0.511363	0.522736	0.485585	0.559637	0.651505	0.616631	0.684828	0.628532	0.588013	0.667322	0.673793	0.63585	0.709589
56	0.558378	0.534567	0.581924	0.532725	0.501837	0.563364	0.584297	0.555162	0.612855	0.614756	0.567264	0.660159	0.591126	0.538931	0.641345	0.639922	0.589517	0.687418	0.502165	0.469694	0.534618	0.476858	0.438957	0.515027	0.528411	0.491448	0.565065	0.657565	0.622791	0.690725	0.633714	0.593483	0.672163	0.680177	0.64259	0.715561
57	0.563689	0.540082	0.587011	0.536885	0.506457	0.567041	0.590167	0.561433	0.618298	0.620511	0.572863	0.665943	0.595855	0.543608	0.646015	0.646152	0.59582	0.693442	0.507235	0.474788	0.539621	0.480706	0.443058	0.518574	0.534129	0.497373	0.570519	0.663348	0.628702	0.696323	0.638543	0.598607	0.676652	0.686325	0.649109	0.721289
58	0.56889	0.545486	0.591991	0.540848	0.510859	0.570544	0.595966	0.567612	0.623693	0.62606	0.578332	0.671456	0.600293	0.548041	0.650358	0.652211	0.602014	0.699239	0.512303	0.479907	0.544596	0.484458	0.44707	0.522022	0.53989	0.503346	0.57601	0.668865	0.634368	0.701638	0.643031	0.603382	0.680814	0.692244	0.655402	0.726788
59	0.573983	0.55077	0.596875	0.544617	0.515023	0.573899	0.601695	0.573681	0.629058	0.631411	0.583669	0.67671	0.604448	0.552222	0.654394	0.6581	0.608092	0.704825	0.517369	0.485042	0.54955	0.488117	0.450977	0.525389	0.545689	0.509351	0.581546	0.674124	0.63979	0.706686	0.647189	0.607803	0.684672	0.697941	0.661466	0.732078
60	0.57897	0.555921	0.60168	0.548198	0.518928	0.577138	0.607354	0.579621	0.634411	0.636567	0.588873	0.68172	0.608329	0.556149	0.658145	0.663825	0.614047	0.710213	0.522431	0.490185	0.554491	0.491684	0.454762	0.528697	0.551524	0.515371	0.58714	0.679135	0.644969	0.711484	0.651029	0.611866	0.688254	0.703425	0.667296	0.737176
61	0.583853	0.560927	0.606421	0.551594	0.52255	0.580291	0.612943	0.58541	0.639773	0.641536	0.59394	0.686498	0.611943	0.559812	0.661632	0.66939	0.619871	0.71542	0.527489	0.495324	0.559427	0.49516	0.458403	0.531969	0.557391	0.521385	0.592804	0.683906	0.649905	0.716047	0.654561	0.615564	0.691585	0.708703	0.672886	0.742101
62	0.588633	0.565776	0.611115	0.554811	0.525864	0.583391	0.618463	0.591028	0.645162	0.646323	0.598867	0.69106	0.6153	0.563204	0.664879	0.674799	0.625555	0.720461	0.532541	0.500447	0.564368	0.498548	0.461881	0.53523	0.563288	0.527374	0.598551	0.688446	0.654598	0.720393	0.657797	0.618889	0.694692	0.713781	0.67823	0.74687
63	0.593314	0.570453	0.615777	0.557853	0.528848	0.586469	0.623914	0.596456	0.650598	0.650932	0.60365	0.695421	0.618406	0.566317	0.667908	0.680057	0.63109	0.725352	0.537587	0.505541	0.569325	0.501848	0.465173	0.538504	0.569212	0.533316	0.604395	0.692763	0.659046	0.724539	0.660746	0.621834	0.697601	0.718668	0.683324	0.751501
64	0.597896	0.574948	0.620424	0.560726	0.531479	0.589556	0.629296	0.601676	0.656096	0.655371	0.608282	0.699595	0.621271	0.56914	0.670743	0.685167	0.636466	0.730111	0.542625	0.510592	0.574309	0.505064	0.468256	0.541817	0.575159	0.53919	0.610349	0.696867	0.66325	0.728501	0.663418	0.624391	0.700336	0.723369	0.68816	0.756013
65	0.602383	0.579247	0.625071	0.563433	0.53374	0.592678	0.63461	0.606673	0.66167	0.659644	0.61276	0.703598	0.623902	0.571663	0.673409	0.690135	0.641672	0.734753	0.547655	0.515586	0.579332	0.508197	0.47111	0.545194	0.581126	0.544976	0.616425	0.700765	0.667207	0.732296	0.665823	0.626552	0.702923	0.727894	0.692735	0.760421
66	0.606777	0.583341	0.629732	0.565979	0.535616	0.595856	0.639857	0.611435	0.66733	0.663758	0.617075	0.707447	0.626306	0.573875	0.675929	0.694964	0.646697	0.739295	0.552675	0.520507	0.584407	0.511248	0.473713	0.548658	0.58711	0.550655	0.622634	0.704465	0.670916	0.73594	0.667971	0.628311	0.705384	0.732247	0.697043	0.764741
67	0.611079	0.587222	0.634417	0.56837	0.5371	0.599105	0.645036	0.615956	0.673082	0.667717	0.621222	0.711158	0.628491	0.575764	0.678325	0.699659	0.651532	0.743754	0.557684	0.525342	0.589544	0.514221	0.476048	0.552228	0.593108	0.556208	0.628985	0.707976	0.674376	0.739448	0.669871	0.629662	0.70774	0.736436	0.701082	0.768987
68	0.615293	0.590885	0.639135	0.57061	0.538191	0.602434	0.650148	0.620233	0.678927	0.671527	0.625194	0.714746	0.630464	0.577321	0.680622	0.704225	0.656166	0.748145	0.562682	0.530076	0.594755	0.517116	0.478102	0.555923	0.599116	0.561622	0.635484	0.711305	0.677585	0.742836	0.67153	0.630601	0.710011	0.740468	0.704849	0.773173
69	0.61942	0.594327	0.643892	0.572704	0.538893	0.605848	0.655195	0.624267	0.684863	0.675194	0.628983	0.718227	0.632233	0.578535	0.68284	0.708665	0.660589	0.752483	0.567667	0.534697	0.600048	0.519937	0.479865	0.559754	0.605131	0.566885	0.642132	0.714459	0.680543	0.746118	0.672959	0.631126	0.712212	0.744349	0.708344	0.777308
70	0.623464	0.59755	0.64869	0.574655	0.539215	0.609345	0.660177	0.628064	0.690882	0.678722	0.632582	0.721618	0.633804	0.579398	0.685	0.712984	0.664793	0.756781	0.572639	0.539193	0.605433	0.522685	0.481332	0.563728	0.61115	0.571987	0.648928	0.717446	0.683248	0.749307	0.674165	0.631237	0.714356	0.748086	0.711567	0.781401
71	0.627425	0.600555	0.653531	0.57647	0.539169	0.612919	0.665094	0.631631	0.696975	0.682118	0.635983	0.724934	0.635185	0.579902	0.687119	0.717186	0.66877	0.761053	0.577596	0.543554	0.610916	0.525361	0.482502	0.567851	0.617169	0.576924	0.655869	0.720273	0.685701	0.752415	0.675155	0.630938	0.716455	0.751683	0.714522	0.78546
72	0.631307	0.603348	0.658411	0.578152	0.538772	0.616563	0.669947	0.634978	0.703133	0.685386	0.639181	0.72819	0.636382	0.580042	0.689214	0.721275	0.672514	0.765309	0.582537	0.547774	0.6165	0.52797	0.483378	0.57212	0.623186	0.581694	0.662947	0.722946	0.687904	0.755453	0.675938	0.630232	0.718517	0.755148	0.717212	0.789489
73	0.635112	0.605937	0.663328	0.579707	0.538041	0.620267	0.674737	0.638116	0.709341	0.688531	0.642168	0.731399	0.637402	0.579815	0.691299	0.725255	0.676021	0.769557	0.587463	0.551846	0.622186	0.530512	0.483966	0.576532	0.629196	0.586297	0.67015	0.725473	0.689858	0.758431	0.67652	0.629126	0.720548	0.758486	0.719644	0.793491
74	0.638843	0.608329	0.668276	0.581138	0.536991	0.624023	0.679465	0.641058	0.715586	0.691558	0.644939	0.734575	0.638251	0.57922	0.693385	0.72913	0.679288	0.773806	0.59237	0.555769	0.627975	0.532989	0.484276	0.581081	0.635197	0.590736	0.677466	0.72786	0.691566	0.761356	0.67691	0.62763	0.722552	0.761703	0.721825	0.797469
75	0.642501	0.610533	0.67325	0.58245	0.535641	0.627819	0.684132	0.643815	0.721857	0.694473	0.64749	0.73773	0.638936	0.578258	0.695482	0.732905	0.682314	0.77806	0.59726	0.55954	0.633863	0.535404	0.484317	0.585758	0.641186	0.595016	0.68488	0.730113	0.693033	0.764237	0.677114	0.625752	0.724531	0.764804	0.723763	0.801421
76	0.64609	0.612559	0.678243	0.583648	0.534008	0.631648	0.688737	0.646399	0.728139	0.697279	0.649817	0.740874	0.639463	0.576931	0.697596	0.736582	0.6851	0.782322	0.60213	0.563162	0.639846	0.537759	0.484104	0.590554	0.647159	0.599144	0.692375	0.732238	0.694263	0.767079	0.677139	0.623503	0.726486	0.767795	0.725466	0.805349
77	0.649611	0.614416	0.68325	0.584737	0.532108	0.635501	0.693283	0.648821	0.73442	0.699983	0.651919	0.744016	0.639837	0.575247	0.699733	0.740167	0.687648	0.786595	0.606981	0.566637	0.645916	0.540056	0.483648	0.595457	0.653112	0.603125	0.699936	0.734241	0.695261	0.769885	0.676991	0.620894	0.728418	0.77068	0.726945	0.809249
78	0.653067	0.616113	0.688263	0.58572	0.529955	0.63937	0.69777	0.651093	0.74069	0.702587	0.653793	0.747164	0.640066	0.57321	0.701895	0.743662	0.689964	0.790878	0.61181	0.569969	0.652066	0.542298	0.482963	0.600457	0.659044	0.606969	0.707543	0.736129	0.696035	0.772661	0.676678	0.617939	0.730327	0.773466	0.72821	0.813119
79	0.65646	0.617661	0.693277	0.586601	0.527565	0.643249	0.702199	0.653225	0.746937	0.705098	0.655442	0.750324	0.640154	0.570831	0.704084	0.747071	0.692052	0.795169	0.616618	0.573163	0.658286	0.544486	0.482061	0.605544	0.66495	0.610683	0.715181	0.737906	0.696592	0.775408	0.676205	0.614649	0.732211	0.776155	0.729271	0.816958
80	0.659792	0.619067	0.698286	0.587386	0.524951	0.647131	0.706571	0.655226	0.75315	0.707519	0.656868	0.753499	0.640109	0.56812	0.706301	0.750398	0.69392	0.799466	0.621403	0.576225	0.664568	0.546623	0.480956	0.610707	0.670828	0.614274	0.722832	0.739578	0.696938	0.778129	0.675578	0.611037	0.734071	0.778755	0.730138	0.820763
81	0.663067	0.620341	0.703284	0.588079	0.522127	0.651013	0.710886	0.657105	0.759322	0.709855	0.658074	0.756693	0.639935	0.565088	0.708544	0.753646	0.695576	0.803764	0.626164	0.579161	0.670901	0.548711	0.47966	0.615935	0.676675	0.617751	0.730479	0.741152	0.697082	0.780825	0.674805	0.607115	0.735905	0.781268	0.730821	0.82453
82	0.666285	0.621491	0.708267	0.588684	0.519103	0.65489	0.715146	0.65887	0.765443	0.712109	0.659065	0.759908	0.639638	0.561747	0.710813	0.756819	0.697028	0.808059	0.630901	0.581978	0.677274	0.550752	0.478185	0.62122	0.682488	0.62112	0.738107	0.742631	0.697033	0.783497	0.67389	0.602896	0.737714	0.783699	0.73133	0.828258
83	0.66945	0.622524	0.71323	0.589205	0.515893	0.658758	0.719351	0.66053	0.771506	0.714287	0.659847	0.763143	0.639225	0.558109	0.713104	0.759919	0.698286	0.812346	0.635614	0.584684	0.683677	0.552748	0.476543	0.626553	0.688264	0.62439	0.7457	0.744021	0.696799	0.786145	0.672841	0.598393	0.739496	0.786054	0.731676	0.831943
84	0.672564	0.623448	0.718169	0.589647	0.512507	0.662615	0.723503	0.662091	0.777504	0.716393	0.660427	0.766398	0.6387	0.554189	0.715417	0.762952	0.699359	0.81662	0.6403	0.587283	0.6901	0.554701	0.474744	0.631924	0.694	0.627566	0.753244	0.745327	0.696387	0.788771	0.671663	0.593619	0.741251	0.788335	0.731866	0.835583
85	0.675628	0.62427	0.72308	0.590013	0.508957	0.666457	0.727602	0.663561	0.783431	0.71843	0.660813	0.769671	0.63807	0.55	0.717749	0.765918	0.700258	0.820874	0.64496	0.589784	0.696533	0.556615	0.472798	0.637327	0.699694	0.630654	0.760725	0.746554	0.695808	0.791373	0.670362	0.588587	0.742981	0.790548	0.731911	0.839177
86	0.678645	0.624996	0.72796	0.590308	0.505253	0.670283	0.731648	0.664945	0.78928	0.720402	0.661013	0.77296	0.63734	0.545555	0.720097	0.768822	0.700991	0.825105	0.649592	0.592192	0.702966	0.55849	0.470717	0.642754	0.705343	0.633662	0.76813	0.747707	0.695069	0.793953	0.668944	0.583308	0.744684	0.792695	0.731818	0.842723
87	0.681618	0.625634	0.732805	0.590537	0.501405	0.674091	0.735644	0.66625	0.795048	0.722314	0.661036	0.776264	0.636515	0.54087	0.72246	0.771667	0.701569	0.829306	0.654197	0.594514	0.709389	0.560329	0.468509	0.648197	0.710944	0.636594	0.775448	0.748791	0.694179	0.796509	0.667416	0.577797	0.746362	0.794782	0.731598	0.846219
88	0.684548	0.626189	0.737613	0.590703	0.497424	0.67788	0.739589	0.667482	0.800728	0.724169	0.660892	0.779577	0.635602	0.535959	0.724834	0.774455	0.702002	0.833471	0.658773	0.596756	0.715795	0.562134	0.466184	0.653651	0.716495	0.639455	0.782668	0.74981	0.693147	0.799044	0.665782	0.572066	0.748015	0.796812	0.731257	0.849663
89	0.687437	0.626667	0.742381	0.59081	0.49332	0.681648	0.743485	0.668647	0.806317	0.725971	0.660589	0.782898	0.634606	0.530835	0.727218	0.77719	0.702299	0.837598	0.66332	0.598923	0.722173	0.563908	0.46375	0.65911	0.721994	0.642251	0.789781	0.750769	0.69198	0.801555	0.66405	0.566129	0.749645	0.798788	0.730803	0.853055
90	0.690287	0.627075	0.747106	0.590864	0.489102	0.685394	0.747333	0.669748	0.811812	0.727725	0.660137	0.786223	0.633532	0.525515	0.729611	0.779874	0.702469	0.84168	0.667836	0.601021	0.728516	0.565652	0.461217	0.664567	0.727439	0.644986	0.796776	0.751672	0.690687	0.804045	0.662226	0.559998	0.751252	0.800714	0.730245	0.856394
91	0.693102	0.627417	0.751788	0.590867	0.48478	0.689119	0.751133	0.670792	0.81721	0.729432	0.659547	0.789549	0.632386	0.520011	0.73201	0.78251	0.702522	0.845714	0.672322	0.603055	0.734817	0.56737	0.458592	0.670018	0.732827	0.647665	0.803646	0.752524	0.689276	0.806512	0.660314	0.553688	0.752838	0.802593	0.72959	0.859679
92	0.695882	0.627699	0.756423	0.590825	0.480363	0.69282	0.754886	0.671784	0.822507	0.731098	0.658826	0.792873	0.631173	0.51434	0.734414	0.7851	0.702466	0.849696	0.676777	0.60503	0.741068	0.569062	0.455885	0.675457	0.738157	0.650292	0.810383	0.75333	0.687756	0.808958	0.658323	0.547212	0.754405	0.80443	0.728844	0.862909
93	0.698629	0.627926	0.76101	0.59074	0.475862	0.696499	0.758593	0.672727	0.827701	0.732725	0.657986	0.796191	0.629901	0.508515	0.736822	0.787648	0.70231	0.853622	0.6812	0.606951	0.747263	0.570731	0.453101	0.680879	0.743426	0.652869	0.816981	0.754093	0.686133	0.811383	0.656258	0.540584	0.755954	0.806227	0.728016	0.866085
94	0.701346	0.628104	0.765548	0.590619	0.471286	0.700154	0.762255	0.673627	0.83279	0.734318	0.657035	0.799501	0.628573	0.502553	0.739233	0.790156	0.702062	0.85749	0.68559	0.608822	0.753395	0.572379	0.45025	0.686281	0.748633	0.655402	0.823435	0.754818	0.684417	0.813786	0.654124	0.533819	0.757487	0.807988	0.727112	0.869206
95	0.704035	0.628238	0.770034	0.590464	0.466643	0.703786	0.765873	0.674488	0.837773	0.735879	0.655982	0.802799	0.627195	0.496466	0.741646	0.792626	0.701731	0.861297	0.689948	0.610649	0.759458	0.574009	0.447339	0.691658	0.753776	0.657894	0.829739	0.755509	0.682616	0.81617	0.65193	0.526931	0.759006	0.809715	0.72614	0.872271
96	0.706696	0.628332	0.774469	0.590279	0.461944	0.707394	0.769447	0.675315	0.842648	0.737413	0.654837	0.806083	0.625775	0.490271	0.744061	0.795061	0.701325	0.86504	0.694272	0.612434	0.765447	0.575622	0.444375	0.697006	0.758853	0.660348	0.83589	0.756171	0.680736	0.818533	0.649681	0.519934	0.760513	0.811412	0.725105	0.875282
97	0.709334	0.628391	0.77885	0.59007	0.457197	0.710979	0.772979	0.676111	0.847414	0.738922	0.653609	0.809351	0.624316	0.483982	0.746477	0.797463	0.700852	0.868717	0.698562	0.614183	0.771357	0.577221	0.441365	0.702321	0.763863	0.662767	0.841884	0.756807	0.678786	0.820878	0.647383	0.512844	0.762009	0.813082	0.724015	0.878238
98	0.711948	0.628421	0.783177	0.58984	0.452412	0.71454	0.776468	0.676881	0.852071	0.740409	0.652307	0.812601	0.622825	0.477614	0.748893	0.799834	0.700318	0.872327	0.702818	0.615898	0.777184	0.578808	0.438317	0.7076	0.768805	0.665154	0.847718	0.757422	0.676774	0.823204	0.645044	0.505674	0.763498	0.814727	0.722876	0.88114
99	0.714541	0.628425	0.787449	0.589593	0.447598	0.718078	0.779917	0.677628	0.856617	0.741879	0.65094	0.81583	0.621309	0.471182	0.75131	0.802176	0.699732	0.875869	0.707039	0.617585	0.782923	0.580385	0.435238	0.71284	0.773678	0.667512	0.85339	0.75802	0.674708	0.825512	0.64267	0.498441	0.76498	0.816351	0.721695	0.883988
100	0.717115	0.62841	0.791665	0.589334	0.442764	0.721593	0.783325	0.678357	0.861053	0.743334	0.649515	0.819036	0.619771	0.4647	0.753728	0.804492	0.699101	0.87934	0.711224	0.619246	0.78857	0.581953	0.432134	0.718037	0.778479	0.669844	0.858899	0.758605	0.672595	0.827804	0.640268	0.491159	0.766459	0.817956	0.720479	0.886782

## Sheet: AD
	BELGIUM									BRUSSELS									FLANDERS									WALLONIA
	Both			Male			Female			Both			Male			Female			Both			Male			Female			Both			Male			Female
Age	mean	lwr	upr	mean	lwr	upr	mean	lwr	upr	mean	lwr	upr	mean	lwr	upr	mean	lwr	upr	mean	lwr	upr	mean	lwr	upr	mean	lwr	upr	mean	lwr	upr	mean	lwr	upr	mean	lwr	upr
ALL	0.264805	0.249884	0.280284	0.225157	0.205624	0.245971	0.301455	0.280881	0.322859	0.374473	0.340365	0.409876	0.324259	0.287807	0.362975	0.42005	0.38083	0.460307	0.184684	0.166004	0.20495	0.152992	0.133209	0.175119	0.214228	0.191314	0.239075	0.396676	0.369105	0.42492	0.345482	0.313831	0.378563	0.443428	0.409865	0.477516
15	0.204646	0.165486	0.250293	0.126853	0.0914425	0.173359	0.279381	0.214092	0.355572	0.275618	0.218231	0.341504	0.170916	0.119919	0.237742	0.370912	0.283372	0.467841	0.139015	0.105597	0.18087	0.0803961	0.0556026	0.1149	0.200026	0.142177	0.273896	0.28787	0.233336	0.349341	0.181283	0.130393	0.246405	0.387736	0.300853	0.482398
16	0.207224	0.169177	0.251239	0.130394	0.0953368	0.175838	0.280652	0.217585	0.353735	0.280624	0.224829	0.344119	0.177014	0.126286	0.242464	0.37435	0.289815	0.467318	0.140265	0.107744	0.180616	0.0824602	0.0578784	0.116195	0.200005	0.144153	0.270653	0.293537	0.240392	0.352971	0.187989	0.13735	0.251848	0.391737	0.307693	0.482731
17	0.209823	0.172914	0.252208	0.134016	0.0993641	0.178359	0.281925	0.221098	0.351926	0.285678	0.231498	0.346816	0.183272	0.132898	0.247295	0.377795	0.296275	0.466866	0.141525	0.109906	0.180398	0.0845708	0.0602261	0.117526	0.199985	0.146127	0.267476	0.29926	0.247541	0.356662	0.194875	0.144582	0.257399	0.395746	0.314567	0.483108
18	0.21244	0.176689	0.253199	0.137713	0.103521	0.180921	0.283198	0.224623	0.350149	0.290773	0.238216	0.349604	0.189685	0.139745	0.252238	0.38124	0.302728	0.466492	0.142794	0.112077	0.180221	0.086727	0.0626431	0.118896	0.199968	0.148095	0.264372	0.305029	0.254762	0.360417	0.201932	0.15208	0.263055	0.399753	0.321454	0.483534
19	0.215071	0.180495	0.254215	0.141483	0.107802	0.183524	0.284468	0.228153	0.348408	0.295898	0.244956	0.352489	0.196242	0.146813	0.257295	0.384679	0.309151	0.466207	0.144071	0.114251	0.180093	0.0889278	0.0651257	0.120309	0.199954	0.150051	0.26135	0.310834	0.262035	0.364236	0.209148	0.15983	0.268814	0.403752	0.328335	0.48401
20	0.217714	0.184324	0.25526	0.145322	0.112201	0.186169	0.285734	0.231679	0.346709	0.301047	0.251693	0.35548	0.202934	0.154084	0.262467	0.388105	0.315519	0.466021	0.145357	0.116422	0.180019	0.0911717	0.06767	0.12177	0.199944	0.15199	0.258419	0.316665	0.269335	0.368121	0.216512	0.167817	0.274674	0.407735	0.335186	0.484541
21	0.220364	0.188165	0.256334	0.149224	0.116712	0.188855	0.286993	0.235193	0.345055	0.306209	0.258398	0.358589	0.20975	0.161537	0.267758	0.391511	0.321805	0.465943	0.146651	0.118583	0.180005	0.0934576	0.0702707	0.123281	0.199941	0.153905	0.255588	0.322509	0.276638	0.372074	0.224011	0.17602	0.280631	0.411692	0.341986	0.485131
22	0.22302	0.192011	0.257441	0.153184	0.121326	0.191583	0.288244	0.238684	0.343453	0.311376	0.265041	0.361823	0.216678	0.169147	0.273173	0.394891	0.327982	0.465985	0.147953	0.120728	0.180059	0.0957837	0.0729221	0.124847	0.199945	0.155789	0.252866	0.328357	0.283918	0.376097	0.23163	0.184415	0.286685	0.415617	0.34871	0.485786
23	0.225675	0.195849	0.258584	0.157197	0.126032	0.194354	0.289485	0.242142	0.341909	0.316537	0.27159	0.365194	0.223703	0.176888	0.278713	0.398238	0.334019	0.466161	0.149262	0.122849	0.180187	0.0981484	0.0756174	0.126474	0.199956	0.157636	0.250263	0.334195	0.291148	0.380193	0.239354	0.192976	0.292832	0.419501	0.355333	0.486511
24	0.228328	0.199668	0.259767	0.161257	0.13082	0.19717	0.290714	0.245557	0.340428	0.321684	0.278014	0.368711	0.230812	0.184727	0.284385	0.401545	0.339887	0.466483	0.150578	0.124938	0.180395	0.10055	0.0783489	0.128166	0.199977	0.159438	0.247787	0.340012	0.298298	0.384364	0.247164	0.201672	0.299072	0.423334	0.361829	0.487312
25	0.230974	0.203457	0.260994	0.165358	0.135675	0.200032	0.291928	0.248915	0.339018	0.326806	0.284281	0.372383	0.23799	0.19263	0.290191	0.404804	0.345556	0.466963	0.151901	0.126988	0.180691	0.102985	0.0811082	0.129929	0.200009	0.161185	0.245448	0.345795	0.305341	0.388612	0.255042	0.210469	0.305404	0.42711	0.36817	0.488196
26	0.23361	0.207201	0.26227	0.169491	0.140582	0.202942	0.293125	0.252205	0.337686	0.331893	0.290361	0.376215	0.245219	0.200562	0.296135	0.40801	0.350994	0.467615	0.153231	0.12899	0.18108	0.105453	0.083886	0.131768	0.200052	0.16287	0.243256	0.351533	0.312246	0.392938	0.26297	0.21933	0.311825	0.43082	0.37433	0.489169
27	0.23623	0.210888	0.263599	0.173651	0.145526	0.205903	0.294304	0.255412	0.336442	0.336934	0.296228	0.380211	0.252482	0.208484	0.30222	0.411155	0.356173	0.46845	0.154567	0.130938	0.181569	0.107951	0.0866724	0.133689	0.200108	0.164484	0.24122	0.357212	0.318987	0.397344	0.270927	0.228215	0.318335	0.434455	0.380282	0.49024
28	0.238831	0.214504	0.264987	0.177829	0.150487	0.208918	0.295462	0.258523	0.335292	0.341918	0.301858	0.384368	0.259761	0.216356	0.308446	0.414232	0.361065	0.469476	0.155909	0.132825	0.182161	0.110475	0.0894572	0.135696	0.200178	0.166018	0.23935	0.362819	0.325537	0.401827	0.278891	0.237083	0.324932	0.438007	0.385998	0.491415
29	0.24141	0.218033	0.266439	0.182017	0.155446	0.211991	0.296597	0.26152	0.334248	0.346836	0.307233	0.38868	0.267037	0.224141	0.314812	0.417235	0.365647	0.4707	0.157256	0.134646	0.182861	0.113024	0.0922298	0.137795	0.200264	0.167464	0.237654	0.368342	0.331871	0.406383	0.286841	0.24589	0.331612	0.441468	0.391451	0.4927
30	0.243961	0.221462	0.267958	0.186206	0.160381	0.215125	0.297706	0.264389	0.33332	0.351676	0.312339	0.393135	0.274291	0.231801	0.321312	0.420155	0.369899	0.472124	0.158609	0.136395	0.183671	0.115593	0.09498	0.139989	0.200365	0.168812	0.23614	0.373767	0.337968	0.411004	0.294752	0.254592	0.338372	0.444828	0.396618	0.4941
31	0.24648	0.224776	0.26955	0.190388	0.16527	0.218325	0.298789	0.267112	0.332518	0.356428	0.317172	0.397712	0.281501	0.239299	0.327937	0.422987	0.373806	0.473744	0.159966	0.13807	0.184591	0.11818	0.0976978	0.14228	0.200484	0.170057	0.234815	0.379082	0.34381	0.41568	0.302603	0.263147	0.345204	0.448081	0.401477	0.495616
32	0.248962	0.227962	0.271218	0.194552	0.17009	0.221593	0.299842	0.269673	0.331853	0.36108	0.321729	0.402388	0.288647	0.246606	0.334672	0.425723	0.377362	0.475548	0.161328	0.139671	0.185619	0.120782	0.100374	0.144671	0.200622	0.171193	0.233685	0.384274	0.349384	0.420396	0.310369	0.271513	0.352099	0.451218	0.406007	0.497248
33	0.251404	0.231007	0.272962	0.198689	0.174816	0.224933	0.300863	0.272055	0.331334	0.365621	0.326016	0.407132	0.295709	0.253694	0.341497	0.428356	0.380566	0.477522	0.162694	0.141197	0.186752	0.123393	0.103001	0.14716	0.20078	0.172216	0.23275	0.389328	0.354681	0.425131	0.318027	0.279651	0.359043	0.454229	0.410196	0.498991
34	0.253801	0.233904	0.274783	0.202789	0.179427	0.228347	0.301851	0.274243	0.330971	0.370041	0.330041	0.411909	0.302663	0.260541	0.348386	0.43088	0.383424	0.479641	0.164064	0.142653	0.187984	0.126011	0.105572	0.149745	0.200959	0.173125	0.232013	0.394234	0.359695	0.429863	0.325551	0.287528	0.366019	0.457108	0.414032	0.500835
35	0.256147	0.236644	0.276675	0.206842	0.1839	0.231832	0.302802	0.276224	0.330769	0.374329	0.333817	0.416683	0.309489	0.267131	0.355307	0.433287	0.385948	0.481875	0.165437	0.144042	0.189306	0.128632	0.108083	0.15242	0.201161	0.173922	0.23147	0.398977	0.364425	0.434564	0.332917	0.295113	0.373001	0.459846	0.417512	0.502767
36	0.258439	0.239223	0.278633	0.210836	0.188216	0.235387	0.303715	0.27799	0.330731	0.378474	0.337357	0.421415	0.316164	0.273451	0.362223	0.43557	0.388156	0.484192	0.166813	0.145372	0.19071	0.13125	0.11053	0.155178	0.201386	0.174613	0.231114	0.403544	0.368875	0.439205	0.340102	0.302383	0.379963	0.462434	0.420638	0.504765
37	0.260671	0.241641	0.280645	0.214762	0.192357	0.239003	0.304588	0.279535	0.330856	0.382464	0.340677	0.426065	0.322668	0.279495	0.369094	0.437722	0.39007	0.486552	0.168191	0.14665	0.192183	0.133863	0.112912	0.158008	0.201636	0.175205	0.230937	0.407924	0.373047	0.443754	0.347081	0.309318	0.386871	0.464865	0.423415	0.506807
38	0.262839	0.243901	0.282699	0.218607	0.196311	0.24267	0.305418	0.280859	0.331136	0.38629	0.34379	0.430595	0.328978	0.285257	0.375875	0.439737	0.391714	0.488916	0.169571	0.147884	0.193716	0.136464	0.11523	0.1609	0.201912	0.175709	0.230927	0.412104	0.376949	0.448179	0.353829	0.315905	0.393686	0.467131	0.425854	0.508863
39	0.264939	0.246007	0.284778	0.222361	0.200068	0.246372	0.306203	0.281968	0.33156	0.38994	0.346712	0.434968	0.335072	0.290738	0.38252	0.441608	0.393111	0.491246	0.170953	0.149084	0.195293	0.13905	0.117485	0.163838	0.202215	0.176139	0.231068	0.416071	0.380588	0.452446	0.360324	0.322135	0.400367	0.469224	0.427971	0.510902
40	0.266965	0.247966	0.286863	0.226012	0.203623	0.25009	0.306941	0.282873	0.332109	0.393404	0.349454	0.439149	0.340929	0.295937	0.388982	0.443328	0.394287	0.493499	0.172336	0.150259	0.196904	0.141615	0.11968	0.166808	0.202547	0.17651	0.231345	0.419813	0.383969	0.456522	0.366542	0.328001	0.40687	0.471135	0.429781	0.512889
41	0.268912	0.249789	0.288935	0.229549	0.206973	0.253801	0.30763	0.28359	0.332762	0.396671	0.352028	0.443103	0.346529	0.300856	0.395215	0.44489	0.395264	0.49564	0.173719	0.15142	0.198534	0.144154	0.121818	0.169793	0.202908	0.176838	0.23174	0.423318	0.387102	0.460377	0.372461	0.333501	0.413151	0.472857	0.431302	0.514791
42	0.270776	0.251483	0.290973	0.232961	0.210118	0.257478	0.308267	0.284136	0.333493	0.399731	0.354443	0.446801	0.351849	0.305497	0.401172	0.446287	0.396063	0.497632	0.175103	0.152575	0.200171	0.146662	0.123903	0.172776	0.203301	0.177141	0.232235	0.426574	0.38999	0.463979	0.378058	0.338634	0.419163	0.474382	0.432553	0.516573
43	0.272552	0.253059	0.292957	0.236235	0.213062	0.261093	0.308851	0.284533	0.334276	0.402574	0.356707	0.450212	0.356871	0.30986	0.40681	0.447513	0.396705	0.499442	0.176486	0.153733	0.201804	0.149134	0.12594	0.17574	0.203726	0.177434	0.232813	0.429569	0.39264	0.4673	0.383311	0.343398	0.424862	0.475702	0.433551	0.518201
44	0.274235	0.254525	0.294867	0.239361	0.215807	0.264618	0.309378	0.2848	0.335084	0.40519	0.358824	0.453311	0.361575	0.313947	0.412088	0.448561	0.397205	0.501039	0.177869	0.154903	0.203419	0.151564	0.127933	0.178666	0.204186	0.177734	0.233457	0.432293	0.395054	0.470313	0.388201	0.347794	0.430205	0.476809	0.434313	0.519643
45	0.27582	0.255891	0.296683	0.242327	0.21836	0.268022	0.309848	0.284959	0.335889	0.407568	0.3608	0.456073	0.36594	0.317756	0.416965	0.449425	0.397577	0.502395	0.17925	0.156093	0.205008	0.153947	0.129884	0.181536	0.20468	0.178056	0.234151	0.434733	0.397235	0.472994	0.392705	0.35182	0.435152	0.477696	0.434852	0.52087
46	0.277303	0.257163	0.298387	0.245121	0.220723	0.271276	0.310257	0.285029	0.336667	0.409699	0.362635	0.458478	0.369948	0.321285	0.421406	0.450097	0.397833	0.503486	0.18063	0.15731	0.206559	0.156276	0.131799	0.184335	0.205211	0.178414	0.234881	0.436879	0.399183	0.475318	0.396805	0.355473	0.439663	0.478354	0.435181	0.521853
47	0.278679	0.258347	0.299964	0.247732	0.222901	0.274353	0.310604	0.285025	0.337396	0.411574	0.36433	0.460506	0.373581	0.32453	0.425378	0.450572	0.397981	0.50429	0.182007	0.158559	0.208065	0.158547	0.133678	0.187044	0.20578	0.178822	0.235634	0.438719	0.400898	0.477266	0.40048	0.358752	0.443703	0.478777	0.43531	0.522568
48	0.279943	0.259448	0.301398	0.25015	0.224896	0.277225	0.310887	0.284963	0.338053	0.413182	0.365881	0.462141	0.376822	0.327485	0.428852	0.450842	0.398028	0.504788	0.183382	0.159847	0.209517	0.160754	0.135525	0.189649	0.206388	0.179291	0.2364	0.440243	0.402375	0.478819	0.403713	0.361651	0.44724	0.478956	0.435246	0.522991
49	0.281091	0.26047	0.302677	0.252363	0.226711	0.279867	0.311102	0.284856	0.338622	0.414514	0.367286	0.463368	0.379652	0.330142	0.4318	0.450902	0.397975	0.504963	0.184753	0.161177	0.21091	0.16289	0.13734	0.192134	0.207037	0.17983	0.237169	0.441439	0.403611	0.479959	0.406486	0.364164	0.450243	0.478884	0.434995	0.523102
50	0.28212	0.261414	0.30379	0.254363	0.228347	0.282259	0.31125	0.284713	0.339087	0.415564	0.368536	0.464181	0.382058	0.332493	0.434206	0.450746	0.397824	0.504806	0.18612	0.162553	0.212239	0.164951	0.139124	0.194488	0.207728	0.180448	0.237934	0.442301	0.404601	0.480677	0.408784	0.366285	0.45269	0.478556	0.43456	0.522886
51	0.283028	0.262282	0.304738	0.256149	0.229809	0.284393	0.31133	0.284542	0.339443	0.416333	0.369629	0.46459	0.384043	0.334536	0.436075	0.450378	0.397574	0.504323	0.187484	0.163974	0.213504	0.166935	0.140878	0.196707	0.20846	0.181146	0.238693	0.442831	0.405344	0.48098	0.41061	0.368018	0.454585	0.477973	0.433945	0.522346
52	0.283819	0.263075	0.305521	0.257721	0.231101	0.286265	0.311343	0.284346	0.339687	0.416827	0.370555	0.464613	0.385611	0.336269	0.437422	0.4498	0.397221	0.503526	0.188844	0.165438	0.214709	0.16884	0.1426	0.19879	0.209234	0.181924	0.239445	0.443035	0.405839	0.480881	0.411972	0.369368	0.455937	0.477142	0.433154	0.521486
53	0.284495	0.263792	0.306147	0.259082	0.232228	0.287877	0.311292	0.284129	0.33982	0.417051	0.371308	0.464269	0.386769	0.337687	0.438265	0.449019	0.396758	0.50243	0.1902	0.166941	0.21586	0.170667	0.144289	0.200738	0.210049	0.182779	0.240193	0.44292	0.406083	0.480396	0.412877	0.370337	0.456759	0.476066	0.432187	0.520318
54	0.285056	0.264429	0.306621	0.260233	0.23319	0.289229	0.311177	0.283889	0.339843	0.417011	0.371873	0.463584	0.387524	0.338783	0.438626	0.448037	0.396176	0.501053	0.191553	0.168479	0.216961	0.172416	0.145941	0.202554	0.210905	0.183708	0.240939	0.442492	0.406071	0.479544	0.413334	0.370925	0.457068	0.474752	0.431042	0.518852
55	0.285505	0.264983	0.306951	0.261178	0.23399	0.290327	0.311	0.283627	0.339762	0.41671	0.372234	0.462585	0.387884	0.339549	0.438531	0.446859	0.395461	0.499418	0.192901	0.170044	0.218024	0.174084	0.147553	0.204243	0.2118	0.184706	0.241691	0.441759	0.405794	0.478344	0.413351	0.371133	0.456882	0.473204	0.429715	0.517104
56	0.285843	0.265449	0.307149	0.261918	0.234627	0.291177	0.310762	0.28334	0.339581	0.416156	0.372374	0.461303	0.387855	0.33997	0.43801	0.445489	0.3946	0.497549	0.194247	0.171628	0.219058	0.175673	0.149119	0.205813	0.212735	0.185764	0.242457	0.440725	0.405244	0.476823	0.412937	0.370956	0.456223	0.471428	0.428199	0.515089
57	0.286074	0.26582	0.307226	0.262458	0.2351	0.291786	0.310464	0.283022	0.339308	0.415354	0.372268	0.459775	0.387447	0.340033	0.437095	0.443933	0.393572	0.495474	0.195589	0.17322	0.220077	0.177183	0.150633	0.207271	0.213709	0.186874	0.243246	0.439399	0.404406	0.475005	0.412102	0.37039	0.455116	0.469428	0.426485	0.512828
58	0.286199	0.266086	0.307196	0.262801	0.235408	0.292164	0.310109	0.282669	0.338953	0.41431	0.37189	0.45804	0.386668	0.33972	0.435823	0.442194	0.392356	0.493225	0.196927	0.174806	0.221098	0.178614	0.152088	0.208628	0.214722	0.188024	0.244071	0.437787	0.403266	0.472921	0.410856	0.369429	0.453587	0.467209	0.424562	0.510341
59	0.28622	0.266238	0.307074	0.262951	0.235548	0.292322	0.309696	0.282274	0.338525	0.413029	0.371208	0.456142	0.385527	0.339011	0.434234	0.440277	0.390927	0.490837	0.198262	0.176371	0.222138	0.179965	0.153473	0.209896	0.215773	0.189203	0.244948	0.435896	0.401805	0.470604	0.409209	0.368065	0.451665	0.464778	0.422418	0.507652
60	0.28614	0.266265	0.306879	0.262912	0.235517	0.292274	0.309228	0.281828	0.338038	0.411517	0.370191	0.454131	0.384034	0.337884	0.432372	0.438187	0.389259	0.488348	0.199594	0.177897	0.223218	0.181238	0.154779	0.21109	0.216862	0.190395	0.245892	0.433734	0.400004	0.468089	0.407172	0.366289	0.449382	0.46214	0.420038	0.504789
61	0.285961	0.266153	0.306627	0.262688	0.23531	0.292034	0.308706	0.281323	0.337503	0.409782	0.368801	0.452055	0.382198	0.336317	0.430281	0.435928	0.38732	0.4858	0.200923	0.179364	0.224364	0.182433	0.155994	0.212226	0.217989	0.191583	0.246923	0.431308	0.397842	0.465413	0.404756	0.36409	0.446771	0.459299	0.417404	0.501777
62	0.285686	0.265892	0.30634	0.262284	0.234924	0.291616	0.308132	0.280748	0.336935	0.407828	0.367002	0.449967	0.38003	0.334287	0.428008	0.433506	0.385081	0.483234	0.202248	0.18075	0.225599	0.183551	0.157107	0.21332	0.219152	0.192749	0.248061	0.428625	0.395296	0.462615	0.401971	0.361458	0.443869	0.456262	0.4145	0.498649
63	0.285317	0.265466	0.306035	0.261705	0.234352	0.291037	0.307506	0.280093	0.336349	0.405663	0.364761	0.447917	0.377539	0.331771	0.4256	0.430924	0.382512	0.480693	0.203571	0.182032	0.226951	0.184593	0.158102	0.214391	0.220352	0.193874	0.249328	0.425693	0.392345	0.459732	0.398831	0.358382	0.440709	0.453035	0.411307	0.495434
64	0.284857	0.264864	0.305732	0.260957	0.23359	0.290315	0.306831	0.279346	0.335761	0.403293	0.362049	0.445952	0.374737	0.328751	0.423102	0.428188	0.379581	0.478221	0.204891	0.183187	0.228446	0.185559	0.158968	0.215459	0.221589	0.194938	0.250748	0.422521	0.388971	0.456801	0.395346	0.354851	0.43733	0.449622	0.407806	0.492163
65	0.284308	0.264074	0.30545	0.260044	0.232633	0.289466	0.306108	0.278495	0.335188	0.400725	0.358841	0.44411	0.371635	0.325214	0.420554	0.425302	0.376265	0.475855	0.206207	0.184195	0.230109	0.186451	0.159689	0.216542	0.222861	0.19592	0.252343	0.419115	0.385158	0.453856	0.39153	0.350859	0.433765	0.446031	0.403981	0.488867
66	0.283673	0.263087	0.305204	0.258971	0.231475	0.288508	0.305339	0.27753	0.334644	0.397964	0.355127	0.442424	0.368245	0.32115	0.417993	0.422273	0.372542	0.473631	0.207522	0.185036	0.231963	0.18727	0.160253	0.217661	0.224168	0.196803	0.254134	0.415484	0.380899	0.450923	0.387395	0.346401	0.430049	0.442266	0.399818	0.485575
67	0.282955	0.261896	0.305007	0.257746	0.230112	0.28746	0.304524	0.276439	0.334145	0.395019	0.350904	0.440914	0.364577	0.316561	0.415448	0.419104	0.368398	0.471578	0.208834	0.185697	0.234024	0.188018	0.160648	0.218835	0.22551	0.197568	0.256142	0.411637	0.376192	0.448024	0.382955	0.341475	0.426213	0.438335	0.395305	0.482313
68	0.282156	0.2605	0.304871	0.256373	0.22854	0.286337	0.303666	0.275212	0.333706	0.391897	0.34618	0.439591	0.360644	0.311455	0.412942	0.415801	0.363828	0.469717	0.210143	0.186169	0.236308	0.188695	0.160863	0.220078	0.226886	0.198203	0.258383	0.407582	0.371041	0.445176	0.378223	0.336087	0.422283	0.434243	0.390435	0.479104
69	0.28128	0.258896	0.304802	0.254858	0.226758	0.285157	0.302765	0.273843	0.33334	0.388603	0.340975	0.438458	0.356459	0.305849	0.410491	0.41237	0.358834	0.468062	0.21145	0.186449	0.238819	0.189303	0.160891	0.221408	0.228297	0.198696	0.260871	0.403328	0.36546	0.442385	0.373214	0.330246	0.418282	0.429997	0.385205	0.475966
70	0.280328	0.25709	0.304804	0.253208	0.224764	0.283933	0.301824	0.272324	0.333057	0.385146	0.335315	0.437508	0.352033	0.299766	0.408102	0.408815	0.353425	0.466621	0.212755	0.186538	0.241563	0.189844	0.160727	0.222835	0.22974	0.199041	0.263616	0.398884	0.359468	0.439655	0.367942	0.323967	0.414229	0.425604	0.379619	0.472914
71	0.279304	0.255087	0.304879	0.251428	0.222559	0.282679	0.300844	0.270651	0.332868	0.381532	0.329233	0.43673	0.347381	0.29324	0.405779	0.405142	0.347618	0.465394	0.214058	0.186441	0.244536	0.190319	0.160368	0.22437	0.231217	0.199236	0.266623	0.394258	0.35309	0.436984	0.362422	0.317271	0.410137	0.42107	0.373684	0.469956
72	0.27821	0.252896	0.305024	0.249524	0.220148	0.281406	0.299826	0.268822	0.332778	0.37777	0.322766	0.436111	0.342515	0.286307	0.403519	0.401356	0.341437	0.464376	0.215359	0.186167	0.247735	0.190731	0.159814	0.226019	0.232726	0.199279	0.269895	0.38946	0.346353	0.434367	0.356668	0.310186	0.406017	0.416401	0.367414	0.467097
73	0.27705	0.250527	0.305238	0.247504	0.217534	0.280124	0.298772	0.266838	0.332792	0.373866	0.315952	0.435634	0.337449	0.279007	0.401317	0.397464	0.33491	0.463558	0.216658	0.185727	0.251152	0.19108	0.159071	0.227785	0.234268	0.199176	0.273431	0.3845	0.33929	0.431798	0.350698	0.30274	0.401874	0.411605	0.360826	0.46434
74	0.275827	0.247991	0.305517	0.245372	0.214726	0.27884	0.297683	0.264702	0.332914	0.369828	0.308832	0.435284	0.332196	0.271385	0.399167	0.393469	0.328065	0.462929	0.217956	0.185132	0.25478	0.191369	0.158144	0.22967	0.235841	0.19893	0.277229	0.379388	0.331932	0.429268	0.344527	0.29497	0.397712	0.40669	0.353941	0.461682
75	0.274542	0.245302	0.305855	0.243137	0.211731	0.27756	0.296562	0.262417	0.333142	0.365664	0.301443	0.435045	0.32677	0.263485	0.39706	0.389379	0.320937	0.462477	0.219252	0.184394	0.258611	0.191599	0.15704	0.231674	0.237444	0.19855	0.281283	0.374132	0.324313	0.42677	0.33817	0.286911	0.393533	0.401661	0.346782	0.459119
76	0.273199	0.24247	0.306248	0.240803	0.208562	0.276288	0.295408	0.25999	0.333477	0.361381	0.293826	0.434902	0.321185	0.255352	0.394988	0.385199	0.313557	0.462187	0.220547	0.183525	0.262636	0.191773	0.15577	0.233794	0.239079	0.198044	0.285588	0.368743	0.316466	0.424295	0.331646	0.278603	0.389337	0.396526	0.339376	0.456647
77	0.271801	0.239509	0.306691	0.238377	0.205229	0.275026	0.294225	0.257429	0.333916	0.356987	0.286016	0.434844	0.315456	0.247032	0.392943	0.380933	0.30596	0.462047	0.221841	0.182536	0.266847	0.191893	0.154344	0.236027	0.240743	0.19742	0.290136	0.363231	0.308424	0.421837	0.324969	0.270085	0.385122	0.391293	0.331748	0.454259
78	0.270351	0.236431	0.30718	0.235866	0.201747	0.273776	0.293013	0.25474	0.334455	0.352491	0.27805	0.434857	0.309597	0.238568	0.390917	0.37659	0.29818	0.462044	0.223134	0.181439	0.271236	0.19196	0.152774	0.238369	0.242436	0.196686	0.294921	0.357606	0.300219	0.419388	0.318159	0.261398	0.380888	0.385968	0.323927	0.451949
79	0.268851	0.233247	0.307709	0.233276	0.198128	0.272539	0.291774	0.251935	0.335091	0.347899	0.269961	0.434933	0.303622	0.230003	0.388903	0.372173	0.290247	0.462165	0.224426	0.180242	0.275798	0.191977	0.151071	0.240816	0.244159	0.195852	0.299936	0.351878	0.291883	0.416944	0.31123	0.252582	0.376634	0.380561	0.315941	0.449708
80	0.267305	0.229969	0.308275	0.230613	0.194388	0.271315	0.290509	0.24902	0.33582	0.34322	0.261783	0.435062	0.297545	0.221379	0.386895	0.367689	0.282194	0.462399	0.225718	0.178956	0.280524	0.191945	0.149248	0.243362	0.245909	0.194926	0.305173	0.346058	0.283446	0.414501	0.304202	0.243676	0.372359	0.375077	0.307816	0.447532
81	0.265714	0.226608	0.308874	0.227884	0.190541	0.270103	0.28922	0.246007	0.336635	0.338462	0.253545	0.435237	0.291381	0.212734	0.384889	0.363143	0.274051	0.462736	0.227009	0.17759	0.285409	0.191867	0.147316	0.246004	0.247687	0.193915	0.310625	0.340156	0.274937	0.412054	0.297089	0.234719	0.368063	0.369524	0.299581	0.445413
82	0.264083	0.223174	0.309503	0.225094	0.186602	0.268902	0.287909	0.242904	0.337534	0.333633	0.245278	0.435451	0.285144	0.204104	0.382881	0.358542	0.265847	0.463167	0.2283	0.17615	0.290448	0.191745	0.145286	0.248736	0.249492	0.192827	0.316284	0.334182	0.266385	0.4096	0.289911	0.225746	0.363745	0.363911	0.291262	0.443346
83	0.262414	0.219678	0.310159	0.22225	0.182585	0.267711	0.286576	0.239722	0.33851	0.32874	0.237009	0.435699	0.278848	0.195526	0.380866	0.353891	0.257609	0.463683	0.229592	0.174644	0.295634	0.191581	0.143171	0.251554	0.251324	0.19167	0.322145	0.328147	0.257816	0.407139	0.282683	0.216794	0.359406	0.358245	0.282886	0.441325
84	0.260709	0.216128	0.310839	0.219359	0.178505	0.266529	0.285223	0.236469	0.33956	0.323791	0.228765	0.435977	0.272507	0.18703	0.378844	0.349196	0.249364	0.464276	0.230883	0.17308	0.300963	0.191377	0.14098	0.254455	0.253181	0.190449	0.328199	0.322061	0.249257	0.404667	0.275421	0.207896	0.355048	0.352533	0.274477	0.439345
85	0.258972	0.212534	0.311541	0.216425	0.174375	0.265356	0.283852	0.233154	0.340678	0.318795	0.220569	0.43628	0.266135	0.178646	0.376812	0.344463	0.241136	0.46494	0.232174	0.171464	0.306431	0.191136	0.138723	0.257433	0.255063	0.189171	0.33444	0.315933	0.240731	0.402185	0.268143	0.199082	0.350672	0.346784	0.266059	0.437404
86	0.257204	0.208904	0.312264	0.213455	0.170209	0.264189	0.282465	0.229785	0.341861	0.313759	0.212444	0.436605	0.259745	0.170402	0.37477	0.339698	0.232948	0.465669	0.233467	0.169801	0.312031	0.19086	0.136411	0.260486	0.25697	0.187841	0.340861	0.309775	0.232261	0.399691	0.260864	0.190382	0.34628	0.341003	0.257656	0.435495
87	0.25541	0.205247	0.313004	0.210454	0.16602	0.26303	0.281061	0.226372	0.343104	0.30869	0.204411	0.436949	0.25335	0.16232	0.372716	0.334906	0.224822	0.466456	0.23476	0.168097	0.317761	0.19055	0.134052	0.263611	0.2589	0.186466	0.347454	0.303597	0.22387	0.397187	0.2536	0.181822	0.341874	0.335201	0.249289	0.433617
88	0.253591	0.20157	0.313761	0.207429	0.16182	0.261876	0.279644	0.222921	0.344403	0.303596	0.19649	0.43731	0.246963	0.154423	0.370651	0.330093	0.216779	0.467298	0.236053	0.166358	0.323614	0.190209	0.131656	0.266803	0.260853	0.185048	0.354213	0.297407	0.215576	0.394671	0.246365	0.173426	0.337457	0.329382	0.24098	0.431767
89	0.25175	0.197881	0.314533	0.204384	0.157619	0.260728	0.278214	0.219441	0.345755	0.298485	0.188699	0.437685	0.240596	0.146729	0.368574	0.325264	0.208837	0.468188	0.237349	0.164587	0.329586	0.18984	0.12923	0.270061	0.262828	0.183595	0.361131	0.291216	0.2074	0.392145	0.239175	0.165216	0.333033	0.323556	0.232746	0.429941
90	0.24989	0.194187	0.31532	0.201325	0.15343	0.259586	0.276773	0.215939	0.347157	0.293364	0.181054	0.438074	0.234261	0.139255	0.366488	0.320425	0.201013	0.469125	0.238645	0.162791	0.335673	0.189444	0.126782	0.273381	0.264825	0.182109	0.368199	0.285033	0.199357	0.389611	0.232042	0.15721	0.328605	0.317728	0.224607	0.428139
91	0.248014	0.190494	0.316119	0.198257	0.149262	0.258449	0.275322	0.212421	0.348604	0.288239	0.173568	0.438475	0.22797	0.132014	0.364392	0.315582	0.193322	0.470102	0.239943	0.160973	0.341869	0.189024	0.124319	0.276762	0.266842	0.180594	0.375409	0.278867	0.191464	0.387068	0.224979	0.149425	0.324177	0.311907	0.216579	0.426358
92	0.246123	0.186808	0.316931	0.195185	0.145124	0.257317	0.273862	0.208894	0.350094	0.283119	0.166256	0.438887	0.221732	0.125017	0.362289	0.31074	0.185779	0.471118	0.241244	0.159138	0.348171	0.188582	0.121849	0.280201	0.26888	0.179056	0.382755	0.272727	0.183734	0.384518	0.218	0.141875	0.319752	0.306099	0.208678	0.424596
93	0.244221	0.183137	0.317754	0.192114	0.141025	0.256191	0.272395	0.205364	0.351624	0.27801	0.159127	0.439308	0.215559	0.118273	0.360179	0.305903	0.178397	0.472169	0.242546	0.157288	0.354572	0.18812	0.119377	0.283695	0.270936	0.177496	0.390228	0.266621	0.17618	0.381963	0.211115	0.134571	0.315334	0.30031	0.200917	0.422853
94	0.24231	0.179484	0.318588	0.189049	0.136974	0.255071	0.270922	0.201837	0.353191	0.272918	0.152191	0.439739	0.209459	0.111788	0.358065	0.301078	0.171186	0.473252	0.24385	0.155429	0.361068	0.18764	0.11691	0.287243	0.27301	0.17592	0.397819	0.260559	0.168814	0.379405	0.204336	0.127523	0.310928	0.294548	0.19331	0.421127
95	0.240392	0.175856	0.319432	0.185994	0.132977	0.253958	0.269445	0.198318	0.354792	0.267849	0.145457	0.440179	0.203443	0.105568	0.355948	0.296268	0.164155	0.474364	0.245158	0.153564	0.367654	0.187145	0.114452	0.290843	0.275102	0.174329	0.405519	0.254547	0.161643	0.376845	0.197672	0.120738	0.306538	0.288819	0.185867	0.419418
96	0.23847	0.172257	0.320285	0.182954	0.129041	0.252852	0.267965	0.194814	0.356425	0.262811	0.138931	0.440627	0.197517	0.0996129	0.353831	0.29148	0.157314	0.475503	0.246468	0.151695	0.374323	0.186636	0.11201	0.294493	0.277211	0.172727	0.413321	0.248593	0.154677	0.374286	0.191132	0.11422	0.302167	0.283129	0.178599	0.417725
97	0.236546	0.168693	0.321148	0.179932	0.125172	0.251754	0.266482	0.191328	0.358086	0.257809	0.132617	0.441083	0.19169	0.0939247	0.351716	0.286717	0.150668	0.476667	0.247781	0.149826	0.381071	0.186116	0.109587	0.298191	0.279335	0.171116	0.421214	0.242705	0.147921	0.371728	0.184724	0.107972	0.297821	0.277483	0.171514	0.416047
98	0.234622	0.165167	0.322019	0.176933	0.121376	0.250665	0.264999	0.187865	0.359774	0.252848	0.126521	0.441548	0.185969	0.0885018	0.349605	0.281984	0.144224	0.477853	0.249097	0.14796	0.387892	0.185587	0.107188	0.301936	0.281473	0.169501	0.429189	0.236889	0.141381	0.369175	0.178456	0.101995	0.293503	0.271888	0.164619	0.414384
99	0.232701	0.161683	0.322899	0.17396	0.117656	0.249585	0.263517	0.184429	0.361487	0.247934	0.120643	0.44202	0.18036	0.0833417	0.347501	0.277285	0.137985	0.47906	0.250417	0.146101	0.39478	0.185051	0.104817	0.305726	0.283625	0.167882	0.437236	0.231151	0.135061	0.366629	0.172334	0.0962889	0.289218	0.266349	0.15792	0.412736
100	0.230785	0.158245	0.323787	0.171017	0.114018	0.248517	0.262036	0.181025	0.363222	0.243072	0.114985	0.442501	0.174868	0.0784405	0.345406	0.272626	0.131955	0.480285	0.251741	0.14425	0.401728	0.18451	0.102478	0.309559	0.28579	0.166264	0.445346	0.225498	0.128962	0.364091	0.166365	0.0908513	0.284969	0.260871	0.151423	0.411103

## Sheet: ANY
	BELGIUM									BRUSSELS									FLANDERS									WALLONIA
	Both			Male			Female			Both			Male			Female			Both			Male			Female			Both			Male			Female
Age	mean	lwr	upr	mean	lwr	upr	mean	lwr	upr	mean	lwr	upr	mean	lwr	upr	mean	lwr	upr	mean	lwr	upr	mean	lwr	upr	mean	lwr	upr	mean	lwr	upr	mean	lwr	upr	mean	lwr	upr
ALL	0.585699	0.567067	0.60409	0.543625	0.518619	0.568412	0.624592	0.600497	0.648086	0.62645	0.591916	0.65974	0.585222	0.545578	0.623792	0.66387	0.627163	0.698699	0.540627	0.514373	0.566658	0.49748	0.466317	0.528662	0.58085	0.550067	0.611016	0.665262	0.636473	0.692872	0.626138	0.592242	0.658839	0.700992	0.669839	0.730389
15	0.393989	0.356384	0.432893	0.356895	0.317913	0.397868	0.432674	0.39036	0.475994	0.426508	0.355422	0.500766	0.385743	0.315466	0.461128	0.463623	0.388561	0.540371	0.355389	0.303986	0.410359	0.319769	0.269345	0.37479	0.392848	0.336356	0.45236	0.440284	0.378904	0.503545	0.402313	0.341074	0.466759	0.48092	0.41575	0.546746
16	0.399675	0.362675	0.437856	0.362335	0.323783	0.402743	0.438482	0.39678	0.481072	0.433311	0.363484	0.50589	0.392384	0.323094	0.466297	0.470578	0.396929	0.545531	0.360543	0.309819	0.414584	0.324638	0.274713	0.378895	0.398178	0.342429	0.4567	0.44765	0.387349	0.50953	0.409461	0.349063	0.47272	0.488323	0.424353	0.552678
17	0.405387	0.369007	0.442837	0.367811	0.329702	0.407646	0.444307	0.403226	0.486163	0.440139	0.371609	0.511029	0.399065	0.330802	0.47149	0.477544	0.405342	0.550698	0.36573	0.315706	0.418829	0.329545	0.28014	0.383026	0.403533	0.348546	0.461055	0.455039	0.39585	0.515525	0.416646	0.357123	0.478703	0.495731	0.432987	0.55861
18	0.411126	0.375378	0.447837	0.373321	0.335667	0.412576	0.450147	0.409698	0.491267	0.446989	0.379791	0.516181	0.405784	0.338585	0.476708	0.484519	0.413791	0.555873	0.370948	0.321646	0.423093	0.334489	0.285624	0.387184	0.40891	0.354703	0.465427	0.462448	0.404402	0.52153	0.423868	0.365251	0.484708	0.503141	0.441646	0.56454
19	0.416889	0.381785	0.452855	0.378864	0.341676	0.417534	0.456001	0.41619	0.496382	0.45386	0.388025	0.521348	0.412539	0.346438	0.481952	0.491501	0.422272	0.561057	0.376196	0.327637	0.427377	0.33947	0.291162	0.391368	0.41431	0.360899	0.469814	0.469873	0.412997	0.527542	0.431122	0.37344	0.490735	0.510549	0.450325	0.570469
20	0.422674	0.388227	0.45789	0.384439	0.347727	0.422518	0.461867	0.422702	0.501509	0.460748	0.396306	0.52653	0.419327	0.354355	0.487221	0.498485	0.430777	0.566249	0.381473	0.333676	0.431682	0.344487	0.296755	0.395579	0.41973	0.367131	0.474218	0.477312	0.421631	0.533563	0.438406	0.381686	0.496782	0.517953	0.459015	0.576396
21	0.428481	0.3947	0.462942	0.390045	0.353817	0.427528	0.467744	0.429229	0.506647	0.467651	0.404626	0.531726	0.426145	0.362331	0.492517	0.50547	0.4393	0.571449	0.386779	0.339761	0.436006	0.349539	0.302399	0.399817	0.42517	0.373397	0.478637	0.484761	0.430296	0.53959	0.445716	0.389983	0.502849	0.525349	0.467711	0.58232
22	0.434308	0.401201	0.468011	0.39568	0.359945	0.432565	0.473629	0.435769	0.511795	0.474567	0.412979	0.536939	0.432991	0.37036	0.49784	0.512453	0.447833	0.576659	0.392111	0.34589	0.44035	0.354625	0.308092	0.404082	0.430627	0.379693	0.483073	0.492217	0.438987	0.545624	0.45305	0.398323	0.508936	0.532734	0.476406	0.58824
23	0.440153	0.407727	0.473096	0.401342	0.366107	0.437628	0.479522	0.442319	0.516954	0.481492	0.421359	0.542167	0.439864	0.378436	0.503191	0.519431	0.45637	0.581879	0.397469	0.352061	0.444715	0.359744	0.313832	0.408375	0.436102	0.386017	0.487526	0.499676	0.447695	0.551664	0.460404	0.406702	0.515042	0.540105	0.485093	0.594156
24	0.446014	0.414277	0.478198	0.407031	0.372301	0.442717	0.485421	0.448876	0.522123	0.488425	0.429758	0.547413	0.446759	0.386551	0.50857	0.526402	0.464902	0.58711	0.402853	0.35827	0.4491	0.364895	0.319618	0.412696	0.441592	0.392366	0.491994	0.507135	0.456414	0.55771	0.467776	0.415113	0.521167	0.547458	0.493765	0.600069
25	0.451891	0.420845	0.483315	0.412746	0.378524	0.447831	0.491324	0.455436	0.527301	0.495362	0.438169	0.552677	0.453675	0.3947	0.513979	0.533362	0.473423	0.592352	0.408259	0.364515	0.453506	0.370077	0.325446	0.417045	0.447097	0.398736	0.49648	0.514591	0.465137	0.563762	0.475162	0.423548	0.527312	0.55479	0.502415	0.605976
26	0.457781	0.42743	0.488448	0.418483	0.384774	0.452972	0.497229	0.461997	0.532488	0.502301	0.446585	0.55796	0.460609	0.402875	0.519419	0.540309	0.481925	0.597607	0.413688	0.370793	0.457934	0.37529	0.331314	0.421423	0.452615	0.405125	0.500983	0.522041	0.473856	0.569819	0.482559	0.432002	0.533475	0.562099	0.511036	0.61188
27	0.463682	0.434027	0.493597	0.424243	0.391047	0.458137	0.503135	0.468555	0.537685	0.509239	0.454998	0.563263	0.467558	0.411068	0.524892	0.547241	0.490399	0.602876	0.419138	0.3771	0.462383	0.380531	0.33722	0.425831	0.458144	0.411529	0.505504	0.529481	0.482565	0.575882	0.489963	0.440466	0.539657	0.569381	0.51962	0.617778
28	0.469594	0.440634	0.498761	0.430024	0.39734	0.463329	0.50904	0.475107	0.542891	0.516173	0.4634	0.568589	0.47452	0.419271	0.530399	0.554154	0.498838	0.60816	0.424608	0.383434	0.466855	0.3858	0.343159	0.430269	0.463684	0.417944	0.510043	0.536908	0.491254	0.581951	0.497372	0.448935	0.545858	0.576633	0.528162	0.623672
29	0.475515	0.447246	0.503941	0.435823	0.40365	0.468546	0.514943	0.481649	0.548105	0.523102	0.471782	0.573938	0.481491	0.427477	0.535941	0.561046	0.507234	0.61346	0.430096	0.389791	0.471349	0.391097	0.34913	0.434738	0.469232	0.424367	0.5146	0.544318	0.499918	0.588026	0.504782	0.457399	0.552079	0.583852	0.536653	0.629561
30	0.481442	0.453861	0.509137	0.441641	0.409975	0.473788	0.520841	0.488178	0.553327	0.530021	0.480136	0.579313	0.48847	0.435677	0.541521	0.567915	0.515578	0.618779	0.435601	0.396167	0.475867	0.396419	0.355129	0.439239	0.474789	0.430795	0.519177	0.551709	0.508547	0.594107	0.512189	0.465852	0.558318	0.591035	0.545087	0.635446
31	0.487375	0.460474	0.51435	0.447474	0.416309	0.479057	0.526734	0.49469	0.558558	0.536929	0.488453	0.584716	0.495453	0.443863	0.547141	0.574758	0.523863	0.624117	0.441123	0.402559	0.48041	0.401765	0.361152	0.443773	0.480351	0.437224	0.523773	0.559077	0.517133	0.600195	0.519592	0.474286	0.564578	0.59818	0.553457	0.641326
32	0.493311	0.467081	0.519578	0.453322	0.422651	0.484351	0.532619	0.501183	0.563797	0.543822	0.496725	0.590149	0.502439	0.452025	0.552803	0.581573	0.532079	0.629477	0.446659	0.408962	0.484978	0.407135	0.367196	0.448341	0.485918	0.443649	0.52839	0.56642	0.52567	0.606291	0.526986	0.482693	0.570858	0.605283	0.561755	0.647203
33	0.499249	0.473678	0.524824	0.459183	0.428997	0.48967	0.538495	0.507653	0.569045	0.550699	0.504942	0.595615	0.509423	0.460155	0.558508	0.588356	0.540218	0.634861	0.452208	0.415373	0.489574	0.412528	0.373258	0.452943	0.491489	0.450066	0.533029	0.573733	0.534148	0.612395	0.534368	0.491065	0.577159	0.612342	0.569975	0.653075
34	0.505188	0.480262	0.530087	0.465055	0.435343	0.495016	0.54436	0.514096	0.5743	0.557557	0.513094	0.601116	0.516403	0.468242	0.564261	0.595106	0.548273	0.64027	0.457769	0.421787	0.494197	0.417941	0.379334	0.457581	0.497062	0.456473	0.53769	0.581014	0.542559	0.618509	0.541735	0.499395	0.583481	0.619354	0.57811	0.658944
35	0.511125	0.486828	0.535368	0.470936	0.441685	0.500388	0.550213	0.52051	0.579563	0.564392	0.521173	0.606655	0.523377	0.47628	0.570063	0.60182	0.556234	0.645707	0.463341	0.4282	0.498849	0.423375	0.385419	0.462257	0.502636	0.462864	0.542375	0.58826	0.550896	0.624633	0.549083	0.507674	0.589824	0.626317	0.586154	0.66481
36	0.517058	0.493372	0.540669	0.476826	0.448021	0.505786	0.556053	0.526889	0.584835	0.571204	0.529168	0.612236	0.530342	0.484257	0.575916	0.608497	0.564094	0.651173	0.468922	0.434607	0.503533	0.428827	0.391509	0.466971	0.508209	0.469235	0.547084	0.595468	0.559151	0.630768	0.556411	0.515895	0.59619	0.633227	0.594101	0.670673
37	0.522987	0.499888	0.545988	0.482722	0.454346	0.511211	0.561876	0.533232	0.590114	0.577988	0.537072	0.617861	0.537295	0.492164	0.581823	0.615132	0.571846	0.65667	0.47451	0.441002	0.508249	0.434296	0.397601	0.471725	0.51378	0.475582	0.551818	0.602635	0.567315	0.636916	0.563714	0.52405	0.602579	0.640084	0.601943	0.676534
38	0.52891	0.506374	0.551328	0.488624	0.460656	0.516662	0.567683	0.539536	0.595401	0.584743	0.544874	0.623533	0.544234	0.499994	0.587787	0.621726	0.579481	0.662201	0.480105	0.447382	0.513	0.439781	0.40369	0.476521	0.519347	0.4819	0.556579	0.609758	0.575381	0.643078	0.570989	0.532133	0.60899	0.646883	0.609677	0.682391
39	0.534824	0.512824	0.55669	0.494528	0.466949	0.52214	0.573472	0.545796	0.600695	0.591467	0.552565	0.629255	0.551156	0.507737	0.593809	0.628274	0.586992	0.667765	0.485705	0.453741	0.517787	0.445281	0.40977	0.48136	0.52491	0.488186	0.561367	0.616834	0.583342	0.649253	0.578234	0.540135	0.615425	0.653624	0.617295	0.688246
40	0.540728	0.519233	0.562073	0.500434	0.47322	0.527645	0.57924	0.55201	0.605996	0.598156	0.560138	0.635029	0.558058	0.515384	0.59989	0.634776	0.594375	0.673365	0.491309	0.460073	0.522613	0.450795	0.415839	0.486243	0.530467	0.494434	0.566184	0.623862	0.591191	0.655443	0.585446	0.548049	0.621883	0.660304	0.624794	0.694098
41	0.546622	0.525598	0.56748	0.506339	0.479466	0.533176	0.584986	0.558174	0.611304	0.604809	0.567584	0.640857	0.564937	0.522929	0.606033	0.641229	0.601621	0.679	0.496915	0.466373	0.52748	0.45632	0.421891	0.491172	0.536016	0.500641	0.571032	0.630838	0.598922	0.661648	0.592621	0.555871	0.628363	0.66692	0.63217	0.699946
42	0.552502	0.531914	0.572911	0.512243	0.485684	0.538733	0.59071	0.564287	0.616619	0.611424	0.574897	0.64674	0.571792	0.530364	0.612237	0.647631	0.608728	0.68467	0.502521	0.472636	0.532389	0.461857	0.427921	0.49615	0.541556	0.506802	0.57591	0.637759	0.606528	0.667869	0.599756	0.563593	0.634865	0.673472	0.639417	0.705789
43	0.558367	0.538177	0.578366	0.518144	0.491871	0.544317	0.596409	0.570345	0.62194	0.617997	0.58207	0.652678	0.578619	0.537683	0.618502	0.653981	0.61569	0.690376	0.508127	0.478855	0.537344	0.467402	0.433925	0.501176	0.547086	0.512913	0.58082	0.644624	0.614004	0.674104	0.60685	0.57121	0.641387	0.679956	0.646534	0.711627
44	0.564216	0.544382	0.583847	0.524039	0.498023	0.549926	0.602082	0.576347	0.627266	0.624528	0.589099	0.658672	0.585416	0.54488	0.624827	0.660276	0.622505	0.696114	0.513731	0.485026	0.542346	0.472956	0.439899	0.506253	0.552604	0.518971	0.585763	0.65143	0.621347	0.680352	0.613899	0.578718	0.647929	0.686371	0.653517	0.717457
45	0.570048	0.550527	0.589353	0.529928	0.504136	0.555561	0.607728	0.582289	0.632597	0.631014	0.595979	0.664719	0.592181	0.551953	0.63121	0.666515	0.62917	0.701882	0.519332	0.491144	0.547397	0.478517	0.445837	0.511381	0.55811	0.52497	0.59074	0.658174	0.628552	0.686612	0.6209	0.586113	0.654487	0.692716	0.660364	0.723278
46	0.57586	0.556607	0.594885	0.535808	0.51021	0.561219	0.613346	0.588169	0.63793	0.637452	0.602709	0.670817	0.598911	0.558896	0.637649	0.672697	0.635685	0.707678	0.524927	0.497202	0.5525	0.484083	0.451737	0.516563	0.563601	0.530907	0.595751	0.664856	0.635617	0.692882	0.627852	0.593391	0.661059	0.698989	0.667075	0.729087
47	0.581651	0.56262	0.600442	0.541679	0.51624	0.566902	0.618933	0.593987	0.643267	0.643842	0.609287	0.676962	0.605604	0.565709	0.644139	0.678819	0.642049	0.713497	0.530517	0.503196	0.557656	0.489653	0.457593	0.521798	0.569076	0.53678	0.600796	0.671471	0.64254	0.699158	0.63475	0.600551	0.667642	0.705189	0.673648	0.734881
48	0.58742	0.568563	0.606023	0.547538	0.522226	0.572606	0.624489	0.599741	0.648604	0.650181	0.615714	0.683148	0.612257	0.572391	0.650676	0.68488	0.648264	0.719334	0.536098	0.509122	0.562866	0.495225	0.463402	0.527087	0.574535	0.542584	0.605875	0.67802	0.649321	0.705436	0.641594	0.60759	0.674232	0.711313	0.680083	0.740657
49	0.593164	0.574434	0.611627	0.553384	0.528164	0.578332	0.630012	0.605428	0.65394	0.656468	0.62199	0.689371	0.618869	0.578941	0.657253	0.690879	0.654333	0.725184	0.541671	0.514975	0.56813	0.500799	0.46916	0.532431	0.579976	0.548318	0.610989	0.684499	0.65596	0.711712	0.648381	0.614508	0.680824	0.717361	0.686383	0.74641
50	0.598884	0.580232	0.617253	0.559215	0.534053	0.584076	0.635502	0.611049	0.659275	0.6627	0.62812	0.695622	0.625438	0.585361	0.663865	0.696814	0.660257	0.73104	0.547233	0.520752	0.57345	0.506372	0.474865	0.537828	0.585397	0.553979	0.616135	0.690908	0.662458	0.71798	0.655109	0.621304	0.687414	0.723332	0.692547	0.752138
51	0.604576	0.585956	0.622899	0.565029	0.539891	0.589838	0.640957	0.616603	0.664605	0.668876	0.634106	0.701895	0.63196	0.591654	0.670503	0.702684	0.66604	0.736896	0.552784	0.52645	0.578825	0.511944	0.480515	0.543279	0.590798	0.559565	0.621314	0.697243	0.668817	0.724236	0.661774	0.627979	0.693996	0.729224	0.698577	0.757835
52	0.610241	0.591604	0.628561	0.570826	0.545678	0.595614	0.646375	0.622088	0.669929	0.674994	0.639953	0.70818	0.638434	0.597821	0.677161	0.708488	0.671687	0.742745	0.558321	0.532068	0.584253	0.517513	0.486106	0.548782	0.596176	0.565075	0.626523	0.703505	0.67504	0.730472	0.668377	0.634534	0.700564	0.735037	0.704477	0.763498
53	0.615876	0.597178	0.634237	0.576604	0.551412	0.601404	0.651756	0.627506	0.675244	0.681053	0.645666	0.714469	0.644859	0.603866	0.683831	0.714225	0.677202	0.748579	0.563844	0.537603	0.589733	0.523077	0.491637	0.554336	0.601532	0.570508	0.631762	0.709691	0.681131	0.736682	0.674913	0.640971	0.707113	0.740769	0.710249	0.76912
54	0.621479	0.602678	0.639923	0.582361	0.557093	0.607203	0.657098	0.632855	0.680549	0.687052	0.651251	0.720753	0.651232	0.609793	0.690503	0.719894	0.682591	0.754391	0.569351	0.543055	0.595262	0.528636	0.497107	0.559938	0.606864	0.575864	0.637026	0.7158	0.687092	0.74286	0.681382	0.647292	0.713636	0.74642	0.715895	0.774698
55	0.627051	0.608105	0.645615	0.588095	0.56272	0.61301	0.662401	0.638137	0.68584	0.692988	0.656713	0.727024	0.657551	0.615607	0.697169	0.725493	0.687857	0.760174	0.574841	0.548425	0.600837	0.534188	0.502515	0.565587	0.61217	0.581142	0.642315	0.721831	0.692928	0.748999	0.687783	0.653498	0.720127	0.75199	0.721419	0.780227
56	0.632589	0.61346	0.65131	0.593806	0.568293	0.618822	0.667664	0.643351	0.691116	0.698862	0.662059	0.733271	0.663814	0.621312	0.703821	0.731023	0.693008	0.765921	0.580313	0.553712	0.606455	0.539731	0.507862	0.571279	0.61745	0.586342	0.647624	0.727783	0.698643	0.755093	0.694112	0.659594	0.72658	0.757476	0.726825	0.785702
57	0.638092	0.618744	0.657003	0.599491	0.573812	0.624635	0.672885	0.648498	0.696372	0.704671	0.667294	0.739488	0.670021	0.626911	0.71045	0.736481	0.698047	0.771624	0.585765	0.558919	0.612111	0.545264	0.513146	0.577011	0.622702	0.591466	0.652951	0.733654	0.704241	0.761134	0.700368	0.665581	0.732989	0.76288	0.732117	0.791118
58	0.64356	0.62396	0.662691	0.605149	0.579277	0.630446	0.678064	0.653579	0.701608	0.710414	0.672424	0.745665	0.676169	0.63241	0.717049	0.741868	0.70298	0.777278	0.591196	0.564047	0.6178	0.550787	0.518369	0.582779	0.627926	0.596515	0.658292	0.739444	0.709727	0.767117	0.706551	0.671462	0.739348	0.768199	0.737297	0.796471
59	0.64899	0.629109	0.668367	0.61078	0.584689	0.636252	0.683199	0.658594	0.70682	0.716091	0.677454	0.751795	0.682257	0.637814	0.72361	0.747182	0.707811	0.782876	0.596605	0.569098	0.623517	0.556296	0.523531	0.588579	0.63312	0.601489	0.663643	0.745152	0.715104	0.773036	0.712659	0.677241	0.74565	0.773435	0.742369	0.801756
60	0.654382	0.634193	0.67403	0.616381	0.590048	0.642049	0.68829	0.663545	0.712004	0.7217	0.682389	0.757871	0.688283	0.643125	0.730124	0.752424	0.712546	0.788413	0.60199	0.574075	0.629258	0.561792	0.528633	0.594408	0.638283	0.606391	0.669001	0.750777	0.720377	0.778886	0.71869	0.68292	0.751891	0.778587	0.747337	0.806971
61	0.659734	0.639213	0.679673	0.621952	0.595354	0.647835	0.693335	0.668432	0.71716	0.72724	0.687234	0.763887	0.694246	0.648349	0.736586	0.757592	0.717188	0.793883	0.607351	0.578981	0.635015	0.567273	0.533678	0.600261	0.643414	0.611222	0.67436	0.756318	0.72555	0.784661	0.724644	0.688503	0.758065	0.783655	0.752204	0.812111
62	0.665046	0.644173	0.685293	0.62749	0.600608	0.653606	0.698335	0.673257	0.722283	0.732711	0.691993	0.769836	0.700144	0.653488	0.742989	0.762686	0.721742	0.799281	0.612686	0.583818	0.640785	0.572738	0.538665	0.606134	0.648513	0.615985	0.679718	0.761775	0.730625	0.790357	0.730518	0.693992	0.764167	0.788638	0.756974	0.817172
63	0.670317	0.649074	0.690887	0.632995	0.605811	0.659359	0.703289	0.67802	0.727372	0.738111	0.696672	0.775713	0.705977	0.658547	0.749327	0.767706	0.726212	0.804604	0.617995	0.588589	0.64656	0.578184	0.543598	0.612021	0.653578	0.62068	0.68507	0.767148	0.735607	0.79597	0.736313	0.699389	0.770193	0.793536	0.761649	0.822153
64	0.675545	0.653916	0.696449	0.638466	0.610963	0.66509	0.708195	0.682722	0.732423	0.743441	0.701272	0.781512	0.711744	0.66353	0.755594	0.772652	0.730602	0.809847	0.623275	0.593298	0.652337	0.583612	0.548477	0.617918	0.658608	0.625311	0.690411	0.772436	0.740499	0.801496	0.742028	0.704697	0.776138	0.79835	0.766233	0.82705
65	0.68073	0.658703	0.701978	0.643901	0.616065	0.670797	0.713052	0.687365	0.737435	0.748699	0.705798	0.787231	0.717442	0.668438	0.761785	0.777523	0.734913	0.815007	0.628526	0.597947	0.658109	0.58902	0.553304	0.623822	0.663603	0.62988	0.695738	0.777638	0.745303	0.806932	0.747661	0.70992	0.781999	0.80308	0.770728	0.831862
66	0.68587	0.663436	0.707468	0.649299	0.621118	0.676476	0.717862	0.69195	0.742405	0.753886	0.710253	0.792864	0.723072	0.673275	0.767896	0.782318	0.739151	0.820081	0.633747	0.602539	0.663871	0.594406	0.558081	0.629726	0.668562	0.634387	0.701048	0.782755	0.750023	0.812274	0.753212	0.715058	0.787773	0.807725	0.775138	0.836585
67	0.690965	0.668115	0.712918	0.65466	0.626122	0.682125	0.722622	0.696477	0.747331	0.758999	0.714639	0.798408	0.728632	0.678043	0.773922	0.787039	0.743317	0.825067	0.638937	0.607076	0.669619	0.599769	0.56281	0.635627	0.673484	0.638837	0.706335	0.787787	0.754661	0.817521	0.75868	0.720115	0.793455	0.812286	0.779463	0.841219
68	0.696014	0.672743	0.718324	0.659981	0.631078	0.687739	0.727332	0.700948	0.752211	0.76404	0.71896	0.803861	0.734121	0.682745	0.779859	0.791685	0.747414	0.829962	0.644094	0.611562	0.675348	0.605109	0.567492	0.641521	0.678367	0.643229	0.711596	0.792732	0.759219	0.822671	0.764065	0.725091	0.799044	0.816764	0.783708	0.845762
69	0.701016	0.677319	0.723683	0.665262	0.635987	0.693318	0.731992	0.705363	0.757043	0.769007	0.723217	0.80922	0.739539	0.687384	0.785706	0.796255	0.751444	0.834764	0.649218	0.615997	0.681054	0.610424	0.572129	0.647403	0.683212	0.647567	0.716829	0.797592	0.763699	0.827721	0.769366	0.72999	0.804537	0.821158	0.787875	0.850212
70	0.705971	0.681847	0.728994	0.670502	0.640849	0.698857	0.736601	0.709724	0.761824	0.7739	0.727413	0.814482	0.744885	0.69196	0.791457	0.800751	0.75541	0.839472	0.654308	0.620385	0.686731	0.615713	0.576723	0.65327	0.688018	0.651852	0.722029	0.802367	0.768103	0.83267	0.774584	0.734813	0.809933	0.82547	0.791964	0.85457
71	0.710878	0.686326	0.734252	0.6757	0.645665	0.704355	0.741159	0.714031	0.766555	0.77872	0.731549	0.819646	0.750158	0.696476	0.797112	0.805171	0.759314	0.844085	0.659363	0.624726	0.692378	0.620974	0.581275	0.659116	0.692783	0.656086	0.727193	0.807056	0.772434	0.837518	0.779717	0.739561	0.815228	0.829699	0.795979	0.858834
72	0.715735	0.690756	0.739458	0.680855	0.650435	0.709809	0.745665	0.718285	0.771231	0.783466	0.735628	0.824711	0.755358	0.700933	0.802667	0.809517	0.763157	0.848602	0.664382	0.629024	0.697989	0.626207	0.585786	0.66494	0.697508	0.66027	0.732319	0.81166	0.776693	0.842263	0.784765	0.744236	0.820422	0.833846	0.799921	0.863005
73	0.720544	0.69514	0.744607	0.685967	0.65516	0.715217	0.750119	0.722487	0.775854	0.788138	0.73965	0.829674	0.760484	0.705334	0.808121	0.813788	0.766942	0.853023	0.669364	0.633279	0.703561	0.631411	0.590258	0.670736	0.702191	0.664406	0.737403	0.816179	0.780881	0.846906	0.78973	0.748839	0.825514	0.837912	0.803791	0.867081
74	0.725301	0.699478	0.7497	0.691033	0.65984	0.720577	0.754521	0.726638	0.78042	0.792735	0.743618	0.834536	0.765537	0.709679	0.813472	0.817985	0.770669	0.857346	0.674309	0.637493	0.709092	0.636584	0.594692	0.676502	0.706832	0.668495	0.742444	0.820614	0.785	0.851445	0.794609	0.753372	0.830503	0.841898	0.807592	0.871063
75	0.730009	0.70377	0.754733	0.696054	0.664476	0.725886	0.75887	0.730738	0.784929	0.797259	0.747532	0.839296	0.770515	0.713969	0.81872	0.822108	0.774341	0.861572	0.679215	0.641667	0.714577	0.641726	0.599088	0.682235	0.711431	0.672539	0.747438	0.824964	0.789051	0.85588	0.799405	0.757835	0.835388	0.845803	0.811325	0.874952
76	0.734665	0.708017	0.759706	0.701029	0.669068	0.731143	0.763167	0.734788	0.789379	0.801708	0.751394	0.843954	0.775418	0.718206	0.823863	0.826158	0.777958	0.865701	0.684081	0.645803	0.720016	0.646836	0.603448	0.687931	0.715986	0.676539	0.752383	0.829231	0.793035	0.860213	0.804115	0.762231	0.840169	0.849629	0.814992	0.878747
77	0.73927	0.712219	0.764618	0.705956	0.673616	0.736347	0.76741	0.738789	0.793771	0.806084	0.755205	0.848509	0.780246	0.722391	0.8289	0.830134	0.781521	0.869734	0.688908	0.649901	0.725405	0.651912	0.607774	0.693588	0.720498	0.680496	0.757278	0.833415	0.796954	0.864442	0.808742	0.766559	0.844845	0.853377	0.818593	0.882449
78	0.743822	0.716377	0.769466	0.710836	0.678121	0.741494	0.7716	0.742741	0.798102	0.810385	0.758965	0.852961	0.784999	0.726524	0.833831	0.834038	0.785033	0.87367	0.693694	0.653963	0.730741	0.656954	0.612064	0.699202	0.724966	0.684411	0.76212	0.837517	0.800809	0.86857	0.813285	0.770822	0.849417	0.857047	0.82213	0.886059
79	0.748322	0.720491	0.77425	0.715668	0.682583	0.746585	0.775737	0.746644	0.802373	0.814614	0.762677	0.857311	0.789678	0.730607	0.838656	0.83787	0.788494	0.87751	0.698438	0.657988	0.736023	0.661961	0.616321	0.704772	0.729389	0.688285	0.766908	0.841537	0.804601	0.872596	0.817744	0.77502	0.853885	0.86064	0.825605	0.889578
80	0.752769	0.724562	0.778969	0.720451	0.687001	0.751618	0.77982	0.750501	0.806582	0.818769	0.766339	0.861559	0.794281	0.73464	0.843375	0.84163	0.791904	0.881255	0.703141	0.661979	0.741249	0.666932	0.620545	0.710295	0.733767	0.692119	0.77164	0.845475	0.808331	0.876521	0.82212	0.779153	0.858248	0.864157	0.829018	0.893007
81	0.757164	0.728589	0.783623	0.725184	0.691378	0.75659	0.783849	0.75431	0.810728	0.822851	0.769954	0.865706	0.798809	0.738624	0.847987	0.845318	0.795265	0.884906	0.7078	0.665935	0.746417	0.671865	0.624737	0.715768	0.738099	0.695913	0.776314	0.849334	0.811999	0.880347	0.826413	0.783223	0.862509	0.867599	0.832371	0.896346
82	0.761504	0.732574	0.78821	0.729867	0.695711	0.761502	0.787825	0.758072	0.814813	0.826861	0.773522	0.869752	0.803262	0.74256	0.852494	0.848937	0.798578	0.888463	0.712417	0.669858	0.751525	0.676762	0.628897	0.72119	0.742386	0.699669	0.78093	0.853112	0.815607	0.884074	0.830624	0.787231	0.866667	0.870967	0.835664	0.899598
83	0.765792	0.736515	0.792731	0.734499	0.700003	0.766353	0.791747	0.761788	0.818834	0.830798	0.777044	0.873699	0.80764	0.746448	0.856895	0.852485	0.801844	0.891929	0.71699	0.673747	0.756572	0.68162	0.633025	0.726559	0.746627	0.703387	0.785486	0.856812	0.819155	0.887703	0.834754	0.791177	0.870722	0.874262	0.838899	0.902762
84	0.770025	0.740415	0.797183	0.73908	0.704252	0.77114	0.795616	0.765459	0.822792	0.834664	0.78052	0.877547	0.811944	0.75029	0.861191	0.855964	0.805063	0.895303	0.721518	0.677603	0.761556	0.686438	0.637122	0.731872	0.750821	0.707067	0.789981	0.860434	0.822645	0.891236	0.838802	0.795063	0.874677	0.877484	0.842077	0.90584
85	0.774205	0.744272	0.801568	0.74361	0.70846	0.775864	0.79943	0.769084	0.826687	0.838459	0.783951	0.881298	0.816173	0.754084	0.865384	0.859375	0.808236	0.898588	0.726002	0.681427	0.766477	0.691217	0.641189	0.737129	0.754969	0.710711	0.794415	0.863979	0.826077	0.894675	0.842769	0.798888	0.878532	0.880635	0.845198	0.908835
86	0.77833	0.748087	0.805885	0.748088	0.712625	0.780523	0.803191	0.772664	0.830518	0.842183	0.787337	0.884952	0.820328	0.757833	0.869473	0.862718	0.811363	0.901784	0.73044	0.685219	0.771333	0.695955	0.645226	0.742327	0.75907	0.714319	0.798786	0.867448	0.829452	0.89802	0.846657	0.802653	0.882288	0.883716	0.848264	0.911746
87	0.782401	0.75186	0.810133	0.752514	0.716749	0.785117	0.806899	0.7762	0.834286	0.845837	0.790679	0.888511	0.824409	0.761535	0.873461	0.865994	0.814446	0.904893	0.734833	0.688979	0.776124	0.700652	0.649232	0.747466	0.763124	0.717891	0.803093	0.870842	0.83277	0.901273	0.850466	0.80636	0.885947	0.886727	0.851276	0.914576
88	0.786418	0.755592	0.814312	0.756888	0.720832	0.789646	0.810553	0.779692	0.83799	0.849422	0.793977	0.891976	0.828418	0.765193	0.877347	0.869203	0.817485	0.907917	0.73918	0.692707	0.780848	0.705307	0.653209	0.752544	0.76713	0.721428	0.807337	0.874161	0.836033	0.904436	0.854196	0.810008	0.889509	0.88967	0.854234	0.917326
89	0.790381	0.759282	0.818423	0.761208	0.724872	0.794108	0.814154	0.78314	0.84163	0.852938	0.797233	0.895348	0.832353	0.768806	0.881133	0.872347	0.82048	0.910857	0.74348	0.696404	0.785505	0.70992	0.657156	0.757559	0.771089	0.72493	0.811517	0.877407	0.839241	0.907511	0.857849	0.813599	0.892977	0.892546	0.857139	0.919997
90	0.794289	0.76293	0.822466	0.765476	0.728872	0.798504	0.817702	0.786544	0.845207	0.856385	0.800446	0.89863	0.836216	0.772374	0.884821	0.875426	0.823433	0.913714	0.747734	0.700071	0.790094	0.714489	0.661074	0.762511	0.775001	0.728398	0.815632	0.880581	0.842394	0.910498	0.861425	0.817133	0.896351	0.895356	0.859992	0.922592
91	0.798144	0.766538	0.82644	0.76969	0.73283	0.802834	0.821197	0.789905	0.848721	0.859766	0.803616	0.901822	0.840006	0.775899	0.888412	0.878442	0.826343	0.91649	0.751941	0.703706	0.794615	0.719016	0.664963	0.767399	0.778865	0.731831	0.819682	0.883683	0.845494	0.913399	0.864926	0.820611	0.899633	0.898101	0.862794	0.925111
92	0.801944	0.770104	0.830345	0.773851	0.736746	0.807096	0.82464	0.793224	0.852172	0.863079	0.806745	0.904927	0.843726	0.77938	0.891908	0.881394	0.829212	0.919186	0.7561	0.707311	0.799068	0.723498	0.668822	0.772221	0.782681	0.735231	0.823666	0.886715	0.848542	0.916217	0.868351	0.824033	0.902825	0.900782	0.865545	0.927557
93	0.805689	0.773629	0.834182	0.777959	0.740622	0.811291	0.82803	0.7965	0.855561	0.866326	0.809832	0.907945	0.847375	0.782818	0.895309	0.884284	0.832039	0.921805	0.760212	0.710885	0.803451	0.727936	0.672653	0.776978	0.786449	0.738598	0.827586	0.889678	0.851537	0.918953	0.871703	0.8274	0.905928	0.903399	0.868247	0.92993
94	0.809381	0.777114	0.837951	0.782013	0.744456	0.815418	0.831368	0.799734	0.858887	0.869508	0.812878	0.910878	0.850954	0.786212	0.898617	0.887112	0.834826	0.924347	0.764277	0.714428	0.807765	0.732329	0.676455	0.781668	0.79017	0.741931	0.83144	0.892573	0.85448	0.921609	0.874982	0.830712	0.908943	0.905955	0.870899	0.932233
95	0.813019	0.780558	0.841653	0.786013	0.74825	0.819479	0.834654	0.802927	0.862151	0.872625	0.815884	0.913728	0.854463	0.789565	0.901835	0.88988	0.837572	0.926815	0.768293	0.717942	0.812009	0.736676	0.680228	0.786291	0.793842	0.745232	0.835228	0.895401	0.857373	0.924186	0.878188	0.833971	0.911874	0.90845	0.873504	0.934467
96	0.816603	0.783961	0.845287	0.78996	0.752002	0.823472	0.837889	0.806078	0.865353	0.875678	0.818849	0.916497	0.857903	0.792875	0.904963	0.892589	0.840278	0.92921	0.772261	0.721425	0.816184	0.740978	0.683972	0.790846	0.797467	0.7485	0.838952	0.898163	0.860215	0.926686	0.881323	0.837176	0.91472	0.910886	0.876061	0.936633
97	0.820134	0.787325	0.848854	0.793853	0.755714	0.827397	0.841072	0.809187	0.868495	0.878668	0.821775	0.919186	0.861275	0.796142	0.908003	0.895238	0.842946	0.931534	0.776181	0.724878	0.82029	0.745234	0.687688	0.795333	0.801044	0.751735	0.84261	0.90086	0.863008	0.929112	0.884389	0.840328	0.917485	0.913263	0.878572	0.938734
98	0.823612	0.790647	0.852354	0.797692	0.759384	0.831256	0.844204	0.812256	0.871576	0.881596	0.824661	0.921797	0.86458	0.799369	0.910957	0.89783	0.845574	0.933788	0.780053	0.728301	0.824326	0.749444	0.691375	0.799752	0.804574	0.754938	0.846204	0.903493	0.865752	0.931464	0.887385	0.843429	0.920169	0.915582	0.881037	0.94077
99	0.827036	0.79393	0.855789	0.801478	0.763014	0.835048	0.847286	0.815285	0.874596	0.884463	0.827507	0.924332	0.867818	0.802554	0.913826	0.900365	0.848164	0.935974	0.783877	0.731694	0.828293	0.753607	0.695033	0.804102	0.808055	0.75811	0.849732	0.906064	0.868448	0.933744	0.890313	0.846478	0.922774	0.917845	0.883456	0.942744
100	0.830408	0.797173	0.859158	0.80521	0.766604	0.838773	0.850318	0.818273	0.877558	0.887269	0.830315	0.926793	0.870991	0.805698	0.916613	0.902843	0.850716	0.938093	0.787652	0.735057	0.83219	0.757724	0.698663	0.808384	0.81149	0.761249	0.853196	0.908573	0.871096	0.935955	0.893174	0.849476	0.925302	0.920053	0.885831	0.944657

## Sheet: INDEX
	BELGIUM									BRUSSELS									FLANDERS									WALLONIA
	Both			Male			Female			Both			Male			Female			Both			Male			Female			Both			Male			Female
Age	mean	lwr	upr	mean	lwr	upr	mean	lwr	upr	mean	lwr	upr	mean	lwr	upr	mean	lwr	upr	mean	lwr	upr	mean	lwr	upr	mean	lwr	upr	mean	lwr	upr	mean	lwr	upr	mean	lwr	upr
ALL	0.860632	0.853479	0.867785	0.881267	0.872962	0.889572	0.841558	0.831104	0.852013	0.848622	0.835245	0.861998	0.869317	0.854436	0.884198	0.829837	0.815085	0.84459	0.878449	0.868843	0.888056	0.898882	0.888791	0.908973	0.859402	0.846862	0.871943	0.828128	0.815652	0.840605	0.848763	0.835293	0.862234	0.809284	0.794961	0.823607
15	0.946554	0.928695	0.964412	0.960568	0.941255	0.979881	0.931679	0.9119	0.951459	0.930863	0.858246	1.00348	0.944393	0.875923	1.01286	0.916736	0.848062	0.98541	0.944394	0.919796	0.968992	0.95803	0.932607	0.983453	0.930374	0.904976	0.955772	0.952597	0.922707	0.982488	0.965591	0.935856	0.995326	0.937935	0.907192	0.968677
16	0.943642	0.928465	0.958819	0.957134	0.940824	0.973443	0.929532	0.912704	0.946361	0.927985	0.865683	0.990287	0.94124	0.882446	1.00004	0.914463	0.855483	0.973442	0.94504	0.923893	0.966186	0.958351	0.936535	0.980166	0.931573	0.909753	0.953393	0.943805	0.918459	0.969152	0.956501	0.93143	0.981572	0.929723	0.903555	0.955891
17	0.940733	0.927936	0.953529	0.953708	0.940028	0.967387	0.927378	0.912998	0.941757	0.925108	0.872846	0.977371	0.938093	0.888638	0.987548	0.912183	0.862584	0.961782	0.945644	0.927669	0.96362	0.958634	0.940027	0.977242	0.932724	0.914081	0.951368	0.935086	0.913624	0.956548	0.947487	0.926451	0.968523	0.921577	0.899116	0.944038
18	0.937828	0.926936	0.948719	0.950299	0.938648	0.961949	0.92521	0.91252	0.937899	0.922235	0.879522	0.964948	0.934955	0.894261	0.975649	0.909892	0.869132	0.950653	0.946168	0.930918	0.961417	0.958845	0.942827	0.974862	0.933782	0.917697	0.949867	0.92651	0.907898	0.945123	0.938624	0.920609	0.95664	0.913562	0.893507	0.933616
19	0.934929	0.925257	0.9446	0.946915	0.93643	0.9574	0.923021	0.911034	0.935007	0.919366	0.885428	0.953303	0.931832	0.898985	0.964679	0.907584	0.874804	0.940365	0.946569	0.933397	0.959741	0.958945	0.944646	0.973243	0.934698	0.920308	0.949087	0.918151	0.900964	0.935338	0.929989	0.913549	0.946429	0.905742	0.886449	0.925034
20	0.932038	0.922759	0.941318	0.943565	0.933235	0.953895	0.920804	0.90851	0.933099	0.916502	0.890131	0.942873	0.928727	0.902315	0.95514	0.905254	0.879125	0.931383	0.946808	0.934863	0.958753	0.958898	0.94527	0.972526	0.935425	0.921698	0.949151	0.910081	0.892753	0.927408	0.921657	0.905153	0.938161	0.898183	0.87804	0.918327
21	0.929158	0.919502	0.938814	0.940258	0.929209	0.951307	0.918553	0.905182	0.931925	0.913646	0.89293	0.934362	0.925647	0.903566	0.947729	0.902895	0.881407	0.924382	0.946843	0.935195	0.958492	0.958668	0.94471	0.972627	0.935916	0.921869	0.949962	0.902371	0.883628	0.921113	0.913704	0.895781	0.931626	0.890951	0.868788	0.913114
22	0.926291	0.915745	0.936836	0.937001	0.924703	0.9493	0.916261	0.901394	0.931128	0.910798	0.892913	0.928684	0.922596	0.902148	0.943044	0.900501	0.880976	0.920026	0.946635	0.934507	0.958762	0.958218	0.943215	0.973221	0.936123	0.921056	0.951191	0.895093	0.87419	0.915997	0.906205	0.886077	0.926334	0.88411	0.859318	0.908903
23	0.923438	0.911778	0.935097	0.933804	0.920057	0.947551	0.91392	0.897436	0.930405	0.907961	0.889807	0.926116	0.919578	0.898273	0.940884	0.898068	0.877909	0.918228	0.946142	0.933071	0.959212	0.957511	0.941109	0.973913	0.936001	0.919565	0.952436	0.888321	0.864993	0.911649	0.899237	0.876628	0.921845	0.877727	0.850148	0.905305
24	0.920602	0.907827	0.933376	0.930675	0.915519	0.945831	0.911524	0.893511	0.929538	0.905135	0.884705	0.925566	0.916599	0.892992	0.940206	0.89559	0.873232	0.917947	0.945323	0.931157	0.959489	0.95651	0.938657	0.974363	0.935501	0.917646	0.953355	0.882126	0.856451	0.907801	0.892875	0.867867	0.917883	0.871865	0.841658	0.902073
25	0.917785	0.904044	0.931525	0.927622	0.911251	0.943994	0.909066	0.889755	0.928378	0.902322	0.879039	0.925606	0.913663	0.887396	0.939931	0.89306	0.868083	0.918036	0.944139	0.928961	0.959317	0.955179	0.936035	0.974323	0.934576	0.915464	0.953687	0.87658	0.848862	0.904297	0.887195	0.860101	0.914289	0.866591	0.834127	0.899055
26	0.914988	0.900529	0.929447	0.924654	0.907363	0.941946	0.906539	0.886261	0.926818	0.899524	0.87374	0.925308	0.910776	0.882208	0.939343	0.890473	0.86322	0.917726	0.942547	0.926601	0.958494	0.953482	0.933352	0.973611	0.933179	0.913119	0.953239	0.871755	0.842457	0.901053	0.882272	0.853562	0.910983	0.86197	0.827774	0.896166
27	0.912215	0.897347	0.927083	0.92178	0.903928	0.939631	0.903937	0.883092	0.924781	0.896741	0.869316	0.924167	0.907941	0.877861	0.93802	0.887824	0.859084	0.916563	0.940509	0.924142	0.956877	0.95138	0.930669	0.972091	0.931263	0.910664	0.951862	0.867724	0.837418	0.898029	0.878184	0.848435	0.907932	0.858067	0.822778	0.893355
28	0.909467	0.894534	0.9244	0.919007	0.900995	0.937019	0.901251	0.880289	0.922213	0.893976	0.866052	0.9219	0.905164	0.874613	0.935714	0.885106	0.855933	0.914279	0.937983	0.921604	0.954362	0.948838	0.928008	0.969668	0.928781	0.908119	0.949442	0.864558	0.833896	0.89522	0.875004	0.844873	0.905136	0.854947	0.819289	0.890604
29	0.906746	0.892095	0.921398	0.916344	0.89858	0.934108	0.898475	0.877868	0.919083	0.89123	0.864105	0.918355	0.902449	0.872604	0.932293	0.882314	0.853907	0.910722	0.934928	0.918966	0.950889	0.945819	0.925359	0.96628	0.925685	0.905468	0.945901	0.86233	0.83201	0.892649	0.87281	0.842995	0.902625	0.852675	0.817429	0.887922
30	0.904055	0.889987	0.918122	0.9138	0.896656	0.930944	0.895603	0.875813	0.915394	0.888504	0.8635	0.913508	0.899802	0.87185	0.927753	0.879443	0.853024	0.905862	0.931303	0.916148	0.946459	0.942286	0.922655	0.961918	0.921928	0.902651	0.941204	0.861111	0.831841	0.890382	0.871676	0.842879	0.900473	0.851318	0.817285	0.88535
31	0.901398	0.888079	0.914716	0.911383	0.895106	0.927659	0.892637	0.874037	0.911237	0.8858	0.863956	0.907644	0.897225	0.87209	0.922359	0.876491	0.853033	0.89995	0.92711	0.912985	0.941235	0.938242	0.919765	0.956718	0.917508	0.899551	0.935465	0.860913	0.833309	0.888518	0.871616	0.844439	0.898792	0.850882	0.818796	0.882969
32	0.898794	0.886107	0.911481	0.909095	0.893663	0.924528	0.889612	0.872332	0.906893	0.883124	0.864498	0.90175	0.894715	0.872497	0.916933	0.873479	0.853109	0.893849	0.922512	0.909278	0.935746	0.933839	0.916526	0.951152	0.912603	0.896038	0.929168	0.8615	0.835884	0.887116	0.872386	0.847126	0.897645	0.851149	0.821459	0.880839
33	0.896265	0.883818	0.908712	0.906942	0.892045	0.921838	0.886577	0.87046	0.902694	0.880481	0.863622	0.897339	0.892268	0.871925	0.91261	0.870429	0.852041	0.888818	0.917715	0.904846	0.930585	0.929272	0.912779	0.945765	0.907434	0.891965	0.922902	0.862574	0.838915	0.886233	0.87368	0.850268	0.897092	0.851842	0.824652	0.879032
34	0.893833	0.881091	0.906575	0.904924	0.890059	0.919789	0.883576	0.868217	0.898935	0.877876	0.860079	0.895673	0.889877	0.869394	0.910361	0.867368	0.84875	0.885985	0.912925	0.899677	0.926172	0.924733	0.908451	0.941016	0.902224	0.887249	0.917198	0.863838	0.841773	0.885903	0.875193	0.853213	0.897173	0.852683	0.827753	0.877614
35	0.891519	0.878012	0.905025	0.903047	0.887691	0.918403	0.880655	0.86552	0.895791	0.875316	0.854232	0.896399	0.88754	0.864889	0.91019	0.864318	0.843292	0.885345	0.908346	0.894065	0.922626	0.920416	0.903682	0.93715	0.897194	0.882003	0.912385	0.864995	0.843931	0.886059	0.876618	0.855426	0.897811	0.853397	0.830203	0.876591
36	0.889344	0.874831	0.903858	0.901312	0.885107	0.917517	0.877862	0.862474	0.89325	0.872805	0.847522	0.898089	0.885249	0.859349	0.91115	0.861305	0.836788	0.885822	0.904184	0.888539	0.919829	0.916512	0.898852	0.934173	0.892568	0.876609	0.908527	0.865748	0.845059	0.886436	0.87765	0.85658	0.89872	0.853706	0.83159	0.875822
37	0.887332	0.871852	0.902812	0.899723	0.882577	0.916869	0.875241	0.859346	0.891136	0.870351	0.8412	0.899501	0.883002	0.853873	0.912131	0.858353	0.830441	0.886266	0.900644	0.883679	0.917609	0.913216	0.894483	0.931949	0.888567	0.871623	0.905511	0.865798	0.845049	0.886548	0.877982	0.856579	0.899385	0.853333	0.831718	0.874949
38	0.885503	0.869359	0.901646	0.898283	0.880381	0.916184	0.872839	0.85647	0.889207	0.867957	0.836136	0.899779	0.880791	0.849325	0.912258	0.855486	0.825144	0.885828	0.897933	0.880021	0.915845	0.910719	0.89111	0.930328	0.885414	0.867627	0.903201	0.86485	0.843931	0.885768	0.877308	0.855455	0.899161	0.852003	0.830577	0.873429
39	0.883879	0.867582	0.900175	0.896995	0.878757	0.915232	0.870701	0.854156	0.887247	0.865631	0.832938	0.898323	0.878614	0.846318	0.91091	0.852729	0.821525	0.883933	0.896255	0.878015	0.914495	0.909216	0.889211	0.92922	0.883331	0.865131	0.90153	0.862605	0.84174	0.88347	0.875323	0.853232	0.897413	0.849438	0.828222	0.870653
40	0.882461	0.866603	0.89832	0.895846	0.877801	0.913892	0.86885	0.852558	0.885141	0.863368	0.831819	0.894917	0.876458	0.845058	0.907858	0.850093	0.819798	0.880388	0.89573	0.87786	0.913599	0.908815	0.88902	0.928611	0.88245	0.864382	0.900519	0.858867	0.838432	0.879302	0.871821	0.849858	0.893785	0.845456	0.824663	0.866249
41	0.88117	0.866136	0.896205	0.894765	0.877275	0.912254	0.867205	0.851441	0.882968	0.861128	0.832049	0.890208	0.87429	0.844876	0.903704	0.847541	0.819267	0.875814	0.896132	0.879059	0.913204	0.9093	0.890106	0.928494	0.882551	0.864922	0.900179	0.853839	0.833958	0.873721	0.867009	0.845305	0.888712	0.840259	0.819904	0.860615
42	0.879906	0.865765	0.894048	0.89366	0.876826	0.910495	0.865662	0.850425	0.880898	0.858863	0.83246	0.885265	0.87207	0.844716	0.899423	0.845021	0.818823	0.871219	0.89715	0.880894	0.913406	0.910369	0.891834	0.928904	0.88332	0.866082	0.900559	0.847826	0.82821	0.867442	0.861192	0.839518	0.882866	0.834144	0.813883	0.854404
43	0.878569	0.865056	0.892082	0.892445	0.876102	0.908788	0.864117	0.849131	0.879103	0.856521	0.831679	0.881363	0.869757	0.843421	0.896093	0.842484	0.817241	0.867726	0.898472	0.882643	0.914302	0.911721	0.893574	0.929869	0.884447	0.867214	0.901681	0.841132	0.821135	0.861129	0.854679	0.832502	0.876855	0.827405	0.806594	0.848215
44	0.877059	0.863656	0.890461	0.89103	0.874824	0.907236	0.862466	0.847272	0.87766	0.854055	0.828625	0.879485	0.867313	0.84018	0.894445	0.839878	0.813668	0.866087	0.899788	0.883725	0.915851	0.913056	0.894804	0.931308	0.885621	0.867819	0.903423	0.834061	0.812906	0.855215	0.847774	0.824455	0.871093	0.820339	0.798247	0.842432
45	0.875275	0.861415	0.889134	0.889327	0.872852	0.905801	0.860604	0.844736	0.876473	0.851415	0.823287	0.879543	0.864696	0.835041	0.894352	0.837153	0.808188	0.866119	0.900786	0.883833	0.917739	0.914073	0.895201	0.932945	0.88653	0.86763	0.90543	0.826917	0.80399	0.849843	0.840787	0.815818	0.865755	0.813244	0.789308	0.837179
46	0.873117	0.858411	0.887824	0.887246	0.87021	0.904283	0.858427	0.841585	0.87527	0.848551	0.816629	0.880474	0.861868	0.828792	0.894944	0.83426	0.801644	0.866875	0.901154	0.88292	0.919388	0.914471	0.894648	0.934294	0.886862	0.866573	0.907151	0.820004	0.79505	0.844958	0.834022	0.807201	0.860843	0.806414	0.780416	0.832412
47	0.870487	0.854853	0.886121	0.8847	0.867031	0.902368	0.855832	0.837974	0.873689	0.845415	0.809808	0.881022	0.858788	0.822413	0.895163	0.831146	0.795032	0.867259	0.900581	0.881057	0.920104	0.913949	0.893146	0.934751	0.886306	0.864663	0.90795	0.813626	0.786805	0.840447	0.827788	0.799283	0.856293	0.800146	0.772257	0.828034
48	0.867283	0.850953	0.883614	0.881598	0.863483	0.899714	0.852712	0.83406	0.871364	0.841956	0.803779	0.880133	0.855416	0.816758	0.894074	0.827761	0.789193	0.86633	0.898755	0.878305	0.919205	0.912206	0.890719	0.933693	0.884552	0.861904	0.907199	0.808088	0.77995	0.836226	0.822391	0.792734	0.852048	0.794736	0.765495	0.823977
49	0.863406	0.846859	0.879953	0.877854	0.859697	0.89601	0.848965	0.829951	0.867979	0.838125	0.799252	0.876999	0.851712	0.812485	0.890939	0.824056	0.784761	0.863351	0.895366	0.874649	0.916083	0.908942	0.887341	0.930544	0.881286	0.858242	0.90433	0.803693	0.775113	0.832273	0.818137	0.788172	0.848102	0.790481	0.76073	0.820232
50	0.858818	0.842617	0.875018	0.873434	0.855723	0.891144	0.844546	0.825667	0.863424	0.833915	0.796564	0.871265	0.847673	0.809916	0.885429	0.820017	0.782031	0.858002	0.890236	0.870025	0.910447	0.903986	0.882952	0.925021	0.87633	0.853593	0.899068	0.800663	0.772675	0.82865	0.815248	0.785975	0.844522	0.787593	0.758313	0.816872
51	0.853728	0.838175	0.869282	0.868535	0.85154	0.88553	0.839652	0.821183	0.858121	0.829478	0.795298	0.863658	0.843437	0.808675	0.878198	0.815784	0.780609	0.850959	0.88373	0.864523	0.902937	0.897685	0.877663	0.917708	0.870033	0.848061	0.892005	0.798879	0.772276	0.825482	0.8136	0.785788	0.841413	0.785948	0.757879	0.814017
52	0.848411	0.833417	0.863405	0.86341	0.847062	0.879758	0.83454	0.816438	0.852642	0.825011	0.794644	0.855378	0.83918	0.808035	0.870324	0.811536	0.77976	0.843313	0.876347	0.858206	0.894488	0.890517	0.871564	0.909471	0.862874	0.841756	0.883991	0.798143	0.773313	0.822972	0.812982	0.787016	0.838949	0.785339	0.758828	0.81185
53	0.843138	0.828253	0.858023	0.858312	0.842221	0.874403	0.829468	0.81141	0.847526	0.820708	0.793546	0.847871	0.835077	0.807071	0.863082	0.807451	0.778574	0.836328	0.868585	0.851127	0.886043	0.882959	0.864731	0.901186	0.855333	0.834801	0.875865	0.798252	0.775141	0.821364	0.813185	0.789022	0.837348	0.785559	0.760533	0.810586
54	0.838181	0.822775	0.853588	0.853493	0.83709	0.869897	0.824693	0.806213	0.843172	0.816765	0.79097	0.84256	0.831304	0.804881	0.857727	0.803707	0.776209	0.831206	0.860944	0.843479	0.878409	0.875487	0.857361	0.893614	0.847891	0.827432	0.86835	0.799008	0.77714	0.820876	0.813998	0.791193	0.836802	0.786401	0.762414	0.810389
55	0.833814	0.817352	0.850277	0.849208	0.831976	0.866439	0.820471	0.801158	0.839785	0.813377	0.786666	0.840088	0.828035	0.801177	0.854893	0.800482	0.772447	0.828518	0.853923	0.835754	0.872091	0.86858	0.849904	0.887256	0.841028	0.820105	0.861951	0.80021	0.778854	0.821566	0.815211	0.793063	0.837358	0.787658	0.764057	0.811259
56	0.830309	0.812562	0.848057	0.845708	0.827389	0.864027	0.817061	0.796721	0.8374	0.810739	0.781619	0.839858	0.825447	0.796714	0.854179	0.797955	0.768044	0.827866	0.84802	0.828747	0.867293	0.862715	0.843089	0.882342	0.835224	0.813503	0.856944	0.801656	0.780113	0.823199	0.816613	0.794435	0.838791	0.789122	0.765306	0.812938
57	0.827939	0.809054	0.846824	0.843248	0.823927	0.862568	0.814719	0.793464	0.835974	0.809046	0.777407	0.840684	0.823713	0.792857	0.85457	0.796303	0.764315	0.828291	0.843734	0.823397	0.864071	0.858369	0.837789	0.878949	0.830959	0.808448	0.853469	0.803147	0.781033	0.825262	0.817996	0.795386	0.840605	0.790585	0.766246	0.814925
58	0.826975	0.807451	0.8465	0.842079	0.822182	0.861975	0.813703	0.791948	0.835458	0.808493	0.77548	0.841506	0.823011	0.790946	0.855076	0.795705	0.762559	0.82885	0.841565	0.820637	0.862493	0.856019	0.834891	0.877147	0.828713	0.805786	0.85164	0.804483	0.781864	0.827101	0.819148	0.796137	0.842159	0.791842	0.767079	0.816605
59	0.827592	0.808151	0.847033	0.842367	0.82255	0.862185	0.814173	0.792542	0.835804	0.809197	0.77671	0.841685	0.823448	0.791816	0.855081	0.796264	0.763584	0.828943	0.84185	0.821083	0.862618	0.855995	0.834998	0.876992	0.828811	0.806091	0.85153	0.805494	0.782806	0.828182	0.819901	0.796882	0.84292	0.792716	0.767966	0.817466
60	0.829563	0.810836	0.84829	0.843931	0.824784	0.863079	0.815906	0.794956	0.836856	0.810964	0.780637	0.841291	0.824871	0.795092	0.854649	0.797787	0.766983	0.828592	0.844283	0.824312	0.864254	0.858031	0.837756	0.878307	0.830948	0.808973	0.852923	0.806139	0.78382	0.828458	0.820249	0.797629	0.842869	0.793165	0.768868	0.817463
61	0.832566	0.814947	0.850184	0.846501	0.828412	0.864589	0.818583	0.798671	0.838494	0.81352	0.786178	0.840861	0.827057	0.799825	0.854289	0.800007	0.771773	0.828241	0.848396	0.829547	0.867245	0.861716	0.842485	0.880947	0.834666	0.813713	0.855618	0.806409	0.784699	0.828118	0.820229	0.798228	0.84223	0.793179	0.769587	0.816771
62	0.836275	0.819846	0.852703	0.849805	0.832897	0.866714	0.821882	0.803105	0.840658	0.81659	0.79181	0.841371	0.829787	0.804693	0.85488	0.802655	0.776621	0.828689	0.853722	0.835904	0.871539	0.866636	0.848413	0.884859	0.839504	0.819507	0.859501	0.806293	0.785147	0.827439	0.819877	0.798439	0.841315	0.792745	0.769843	0.815648
63	0.840365	0.824845	0.855885	0.853576	0.83765	0.869503	0.825484	0.807644	0.843324	0.819903	0.795695	0.844111	0.832838	0.808162	0.857515	0.805464	0.77999	0.830938	0.859792	0.842457	0.877128	0.872378	0.854727	0.890029	0.845003	0.825524	0.864483	0.805782	0.784845	0.82672	0.819229	0.798003	0.840455	0.791854	0.769332	0.814377
64	0.844513	0.829281	0.859746	0.857543	0.842091	0.872995	0.829069	0.811689	0.84645	0.823185	0.796568	0.849802	0.835991	0.809185	0.862798	0.808165	0.780776	0.835555	0.866141	0.848389	0.883892	0.87853	0.860691	0.896369	0.850704	0.831012	0.870396	0.804867	0.783549	0.826184	0.818321	0.796729	0.839914	0.790495	0.767806	0.813184
65	0.848394	0.83266	0.864128	0.861436	0.845757	0.877114	0.832317	0.814754	0.849881	0.826162	0.794608	0.857716	0.839024	0.807851	0.870197	0.810492	0.778954	0.842031	0.872299	0.853182	0.891415	0.884679	0.8658	0.903557	0.856147	0.835429	0.876864	0.803537	0.781179	0.825894	0.81719	0.794583	0.839797	0.788658	0.76516	0.812155
66	0.851684	0.834756	0.868612	0.864985	0.848406	0.881564	0.834909	0.816542	0.853276	0.828561	0.790778	0.866344	0.841717	0.804949	0.878485	0.812177	0.775221	0.849132	0.877799	0.856622	0.898976	0.890412	0.869816	0.911007	0.860871	0.838471	0.883271	0.801783	0.777841	0.825724	0.81587	0.79171	0.840031	0.78633	0.761462	0.811198
67	0.854058	0.835536	0.87258	0.867922	0.84999	0.885854	0.836524	0.816925	0.856122	0.830109	0.785945	0.874273	0.843848	0.801263	0.886433	0.81295	0.770317	0.855584	0.882174	0.858632	0.905716	0.895316	0.872658	0.917973	0.864418	0.839983	0.888854	0.799595	0.773772	0.825417	0.8144	0.788382	0.840418	0.783502	0.756917	0.810087
68	0.855192	0.835021	0.875362	0.869975	0.850543	0.889408	0.836841	0.815858	0.857825	0.830532	0.780698	0.880365	0.845196	0.797371	0.893022	0.812546	0.764788	0.860304	0.884956	0.859135	0.910777	0.898978	0.874269	0.923687	0.866328	0.839838	0.892818	0.796963	0.769251	0.824676	0.812814	0.78491	0.840718	0.780163	0.751791	0.808536
69	0.854822	0.833239	0.876406	0.870927	0.850117	0.891737	0.835604	0.813333	0.857875	0.829609	0.775417	0.883801	0.845583	0.793654	0.897512	0.810748	0.758993	0.862502	0.885766	0.858053	0.913478	0.901063	0.874602	0.927525	0.866228	0.837938	0.894517	0.793883	0.764529	0.823236	0.811143	0.781568	0.840717	0.776307	0.746329	0.806286
70	0.852935	0.830296	0.875573	0.870759	0.848822	0.892697	0.832797	0.809451	0.856143	0.82733	0.770259	0.8844	0.844996	0.790266	0.899726	0.807546	0.753096	0.861996	0.884576	0.855472	0.913679	0.901542	0.873745	0.92934	0.864092	0.834365	0.893819	0.790362	0.759733	0.820991	0.809395	0.778471	0.840319	0.771945	0.740659	0.80323
71	0.849574	0.826273	0.872876	0.869507	0.84673	0.892284	0.828469	0.804285	0.852652	0.823734	0.765269	0.882199	0.843464	0.787239	0.899689	0.802983	0.747146	0.858819	0.881446	0.851472	0.911421	0.900465	0.871772	0.929158	0.859983	0.829195	0.890772	0.786415	0.754914	0.817916	0.807572	0.775646	0.839499	0.767091	0.734834	0.799348
72	0.844787	0.821201	0.868374	0.867204	0.843865	0.890543	0.822666	0.797857	0.847476	0.818864	0.76044	0.877289	0.841017	0.784552	0.897483	0.797101	0.741137	0.853066	0.876438	0.846088	0.906788	0.897878	0.868712	0.927045	0.853962	0.822455	0.88547	0.782054	0.750078	0.81403	0.805678	0.773074	0.838281	0.761762	0.728857	0.794666
73	0.83862	0.815079	0.862161	0.863883	0.840216	0.887551	0.815437	0.790149	0.840725	0.812761	0.75572	0.869802	0.837685	0.782133	0.893238	0.789944	0.735009	0.844879	0.869612	0.839322	0.899902	0.893833	0.864562	0.923103	0.846091	0.814137	0.878046	0.777294	0.745201	0.809386	0.803713	0.770701	0.836725	0.755972	0.722698	0.789246
74	0.831118	0.807869	0.854367	0.85958	0.835743	0.883416	0.806829	0.781114	0.832545	0.805465	0.751011	0.85992	0.833497	0.779859	0.887135	0.781554	0.72865	0.834457	0.861028	0.831141	0.890916	0.888376	0.859284	0.917467	0.836432	0.804197	0.868667	0.772147	0.740229	0.804065	0.801681	0.768442	0.83492	0.749737	0.716295	0.783179
75	0.822327	0.799497	0.845157	0.854327	0.830377	0.878277	0.79689	0.770671	0.823109	0.797018	0.74614	0.847895	0.828483	0.777533	0.879433	0.771972	0.721867	0.822078	0.850748	0.821469	0.880027	0.881556	0.852804	0.910308	0.825046	0.792557	0.857534	0.766627	0.735075	0.798178	0.799583	0.76618	0.832987	0.743073	0.709557	0.776588
76	0.812294	0.789843	0.834746	0.848159	0.824019	0.872298	0.785667	0.758723	0.812611	0.78746	0.740815	0.834106	0.822672	0.774842	0.870501	0.761243	0.714346	0.80814	0.838831	0.810183	0.867479	0.873423	0.84501	0.901836	0.811994	0.77911	0.844879	0.760747	0.729621	0.791872	0.797423	0.763772	0.831075	0.735994	0.702364	0.769624
77	0.801065	0.778741	0.823389	0.841109	0.816551	0.865668	0.773207	0.745163	0.801251	0.776834	0.734525	0.819142	0.816093	0.7713	0.860887	0.749408	0.705583	0.793232	0.825339	0.797105	0.853572	0.864025	0.835747	0.892303	0.797339	0.763728	0.83095	0.75452	0.723712	0.785327	0.795202	0.76105	0.829354	0.728517	0.694571	0.762462
78	0.788685	0.765998	0.811372	0.833212	0.807844	0.858579	0.759559	0.729902	0.789216	0.765179	0.72641	0.803948	0.808777	0.766185	0.851368	0.736509	0.694829	0.778189	0.810331	0.782012	0.83865	0.85341	0.824832	0.881988	0.781142	0.746282	0.816002	0.74796	0.717162	0.778758	0.792923	0.757839	0.828007	0.720655	0.686018	0.755292
79	0.7752	0.751436	0.798965	0.824501	0.797789	0.851213	0.744769	0.71288	0.776659	0.752538	0.715201	0.789875	0.800752	0.75858	0.842924	0.72259	0.68113	0.76405	0.793869	0.764679	0.82306	0.841627	0.812083	0.871172	0.763465	0.726668	0.800263	0.74108	0.709769	0.772391	0.790588	0.753976	0.827199	0.712426	0.676551	0.7483
80	0.760658	0.734947	0.786369	0.81501	0.786314	0.843706	0.728886	0.694085	0.763687	0.738951	0.699605	0.778297	0.792048	0.74763	0.836467	0.707693	0.663646	0.751739	0.776013	0.744937	0.80709	0.828726	0.797363	0.860088	0.74437	0.70483	0.783909	0.733894	0.701349	0.766438	0.788199	0.749334	0.827064	0.703843	0.666043	0.741643
81	0.745102	0.716522	0.773683	0.804774	0.773401	0.836147	0.711957	0.67355	0.750363	0.724459	0.679128	0.769791	0.782696	0.732951	0.83244	0.69186	0.642067	0.741653	0.756825	0.722736	0.790913	0.814753	0.780619	0.848888	0.723917	0.680775	0.76706	0.726414	0.691773	0.761055	0.785759	0.743836	0.827682	0.694923	0.654416	0.73543
82	0.728581	0.696243	0.760919	0.793825	0.75908	0.82857	0.694029	0.651341	0.736716	0.709104	0.654267	0.763941	0.772723	0.714733	0.830713	0.675134	0.616672	0.733595	0.736363	0.698142	0.774584	0.79976	0.761886	0.837633	0.70217	0.654564	0.749776	0.718654	0.680988	0.756321	0.78327	0.737462	0.829078	0.685681	0.641646	0.729715
83	0.711139	0.674237	0.748041	0.782199	0.743419	0.820978	0.67515	0.627545	0.722755	0.692927	0.62585	0.760003	0.76216	0.693464	0.830856	0.657557	0.588	0.727114	0.714689	0.671305	0.758074	0.783792	0.741266	0.826319	0.679189	0.626298	0.732081	0.710628	0.669016	0.75224	0.780734	0.730235	0.831234	0.676131	0.627758	0.724505
84	0.692822	0.650646	0.734998	0.769928	0.726502	0.813354	0.655368	0.602257	0.708478	0.675968	0.594564	0.757372	0.751036	0.669639	0.832433	0.639172	0.556566	0.721778	0.691864	0.642402	0.741327	0.766901	0.718892	0.814909	0.655037	0.596098	0.713975	0.702348	0.65593	0.748767	0.778154	0.722206	0.834103	0.66629	0.612811	0.71977
85	0.673678	0.625606	0.721749	0.757047	0.70842	0.805674	0.634729	0.575575	0.693884	0.658269	0.560885	0.755653	0.739381	0.643658	0.835105	0.620022	0.522774	0.71727	0.667948	0.61161	0.724286	0.749133	0.694907	0.803359	0.629774	0.564093	0.695454	0.693829	0.641826	0.745832	0.775533	0.71344	0.837626	0.656173	0.596879	0.715468
86	0.653751	0.599238	0.708264	0.74359	0.689261	0.797918	0.613283	0.547593	0.678972	0.639871	0.525139	0.754604	0.727225	0.615817	0.838633	0.600149	0.486923	0.713374	0.643002	0.579093	0.70691	0.730539	0.669446	0.791631	0.603463	0.530411	0.676514	0.685083	0.626805	0.743361	0.772871	0.704001	0.841741	0.645795	0.580043	0.711548
87	0.633087	0.571651	0.694524	0.72959	0.669111	0.790069	0.591075	0.518404	0.663746	0.620815	0.487562	0.754069	0.714596	0.586341	0.84285	0.579595	0.449247	0.709944	0.617086	0.544998	0.689175	0.711165	0.642631	0.779699	0.576165	0.495175	0.657154	0.676123	0.61096	0.741287	0.770172	0.693955	0.84639	0.635172	0.562382	0.707962
88	0.611734	0.542946	0.680522	0.715082	0.648046	0.782117	0.568154	0.488095	0.648214	0.601143	0.44834	0.753946	0.701524	0.555408	0.84764	0.558404	0.409927	0.70688	0.590261	0.509454	0.671068	0.691062	0.614578	0.767546	0.547942	0.458501	0.637382	0.666964	0.594376	0.739553	0.767439	0.683361	0.851517	0.624318	0.543969	0.704667
89	0.589736	0.513212	0.66626	0.700099	0.626143	0.774055	0.544568	0.45675	0.632386	0.580895	0.407625	0.754165	0.688039	0.523164	0.852915	0.536617	0.369121	0.704112	0.562588	0.472584	0.652593	0.670278	0.58539	0.755166	0.518855	0.420502	0.617208	0.657618	0.577127	0.738109	0.764672	0.672271	0.857074	0.61325	0.524874	0.701625
90	0.56714	0.482534	0.651746	0.684675	0.60347	0.765881	0.520363	0.424451	0.616275	0.560112	0.365551	0.754673	0.674171	0.489733	0.858609	0.514277	0.326964	0.70159	0.534127	0.434497	0.633757	0.648861	0.555163	0.742559	0.488967	0.381283	0.596651	0.648099	0.559282	0.736916	0.761876	0.660735	0.863017	0.601982	0.505159	0.698804
91	0.543992	0.450995	0.636989	0.668845	0.580093	0.757596	0.495588	0.391277	0.5999	0.538836	0.322241	0.75543	0.659948	0.455229	0.864667	0.491427	0.283579	0.699274	0.504939	0.395301	0.614576	0.62686	0.523988	0.729732	0.458339	0.340948	0.575729	0.63842	0.540899	0.73594	0.759051	0.648797	0.869306	0.59053	0.484884	0.696176
92	0.520337	0.41867	0.622005	0.652641	0.556077	0.749206	0.47029	0.357303	0.583277	0.517107	0.27781	0.756405	0.645401	0.419755	0.871047	0.468109	0.239083	0.697134	0.475084	0.355095	0.595073	0.604324	0.491953	0.716695	0.427032	0.299596	0.554469	0.628594	0.522034	0.735154	0.756201	0.636497	0.875905	0.578909	0.464101	0.693716
93	0.496222	0.385635	0.60681	0.636099	0.531482	0.740715	0.444516	0.322605	0.566427	0.494968	0.232367	0.757568	0.630559	0.383408	0.877709	0.444365	0.193585	0.695146	0.444623	0.313976	0.575269	0.581302	0.459141	0.703462	0.395109	0.257322	0.532895	0.618635	0.502736	0.734533	0.753327	0.623873	0.882782	0.567134	0.442863	0.691405
94	0.471694	0.351963	0.591425	0.619251	0.506369	0.732133	0.418314	0.287257	0.549372	0.472458	0.186018	0.758898	0.615451	0.346282	0.884619	0.420239	0.14719	0.693289	0.413616	0.27204	0.555192	0.557841	0.425633	0.690049	0.36263	0.214223	0.511038	0.608556	0.483055	0.734057	0.750433	0.61096	0.889906	0.555222	0.421219	0.689224
95	0.446797	0.317726	0.575867	0.602132	0.480796	0.723468	0.391732	0.25133	0.532134	0.449619	0.138867	0.760372	0.600106	0.308467	0.891746	0.395773	0.100002	0.691545	0.382125	0.229379	0.534871	0.533992	0.391508	0.676475	0.329658	0.17039	0.488926	0.59837	0.463034	0.733706	0.74752	0.597793	0.897247	0.543187	0.399216	0.687157
96	0.421578	0.282995	0.56016	0.584776	0.454821	0.714731	0.364817	0.214898	0.514736	0.426493	0.0910149	0.761971	0.584556	0.270051	0.899061	0.371009	0.0521206	0.689898	0.35021	0.186085	0.514335	0.509801	0.356843	0.662759	0.296255	0.125916	0.466593	0.588091	0.442718	0.733464	0.74459	0.584403	0.904778	0.531044	0.376899	0.68519
97	0.396082	0.247841	0.544324	0.567216	0.4285	0.705933	0.337617	0.178031	0.497203	0.403119	0.0425631	0.763676	0.568828	0.231119	0.906536	0.34599	0.00364595	0.688334	0.317931	0.142247	0.493614	0.485319	0.321716	0.648922	0.262481	0.0808912	0.444071	0.577732	0.422149	0.733315	0.741647	0.570821	0.912473	0.518809	0.354311	0.683308
98	0.370357	0.212332	0.528382	0.549487	0.401889	0.697086	0.310179	0.1408	0.479558	0.379541	-0.00638914	0.765471	0.552952	0.191757	0.914147	0.320758	-0.0453241	0.686841	0.285349	0.097955	0.472742	0.460593	0.286202	0.634985	0.228399	0.035405	0.421394	0.567306	0.401366	0.733246	0.738692	0.557077	0.920307	0.506498	0.331496	0.6815
99	0.344448	0.176537	0.512358	0.531623	0.375044	0.688202	0.282551	0.103274	0.461827	0.355797	-0.0557432	0.767338	0.536959	0.15205	0.921868	0.295356	-0.0946924	0.685405	0.252524	0.053298	0.45175	0.435673	0.250375	0.620971	0.194071	-0.0104534	0.398595	0.556827	0.380411	0.733244	0.735727	0.5432	0.928254	0.494125	0.308495	0.679755
100	0.3184	0.140527	0.496274	0.513656	0.348019	0.679293	0.25478	0.0655239	0.444036	0.331931	-0.105401	0.769262	0.520877	0.11208	0.929674	0.269827	-0.144362	0.684016	0.219518	0.00836391	0.430672	0.410607	0.214311	0.606902	0.159557	-0.0565954	0.375709	0.546308	0.359322	0.733294	0.732756	0.52922	0.936292	0.481706	0.285351	0.678061

## Sheet: VAS
	BELGIUM									BRUSSELS									FLANDERS									WALLONIA
	Both			Male			Female			Both			Male			Female			Both			Male			Female			Both			Male			Female
Age	mean	lwr	upr	mean	lwr	upr	mean	lwr	upr	mean	lwr	upr	mean	lwr	upr	mean	lwr	upr	mean	lwr	upr	mean	lwr	upr	mean	lwr	upr	mean	lwr	upr	mean	lwr	upr	mean	lwr	upr
ALL	77.0991	76.5143	77.6839	78.0061	77.2337	78.7786	76.2607	75.4681	77.0532	77.8627	76.7487	78.9767	77.8184	76.1026	79.5341	77.9029	76.5203	79.2854	76.9181	76.1076	77.7286	78.1884	77.0817	79.2952	75.7338	74.6435	76.8242	77.2646	76.3059	78.2232	77.6861	76.5798	78.7924	76.8796	75.5444	78.2149
15	83.1233	81.3558	84.8909	83.78	81.9999	85.5601	82.4862	80.6065	84.3658	86.8398	84.1831	89.4964	86.72	83.8544	89.5856	86.7694	83.9553	89.5836	81.6299	79.5445	83.7153	82.6582	80.5729	84.7434	80.7313	78.4596	83.0029	85.0712	82.8207	87.3218	85.1921	82.8206	87.5636	84.8396	82.4631	87.2161
16	83.0055	81.3991	84.612	83.6634	82.036	85.2908	82.3696	80.6455	84.0936	86.5361	84.0777	88.9944	86.4247	83.733	89.1164	86.4741	83.851	89.0973	81.583	79.6649	83.5011	82.6089	80.6668	84.5511	80.682	78.5764	82.7876	84.8444	82.7437	86.945	84.9708	82.7702	87.1714	84.6184	82.3581	86.8786
17	82.8872	81.4306	84.3438	83.5462	82.0587	85.0337	82.2524	80.6724	83.8324	86.232	83.9609	88.5031	86.129	83.598	88.66	86.1785	83.7351	88.6219	81.5355	79.7709	83.3	82.559	80.7429	84.3752	80.6321	78.6801	82.5842	84.6173	82.6321	86.6025	84.7493	82.6891	86.8095	84.3968	82.217	86.5766
18	82.7677	81.4459	84.0895	83.4279	82.0636	84.7922	82.1341	80.6832	83.5849	85.9273	83.8294	88.0252	85.8326	83.4465	88.2188	85.8821	83.6043	88.1599	81.4865	79.8581	83.115	82.5078	80.7968	84.2187	80.5808	78.7667	82.395	84.3897	82.4803	86.299	84.5272	82.5711	86.4833	84.1747	82.037	86.3125
19	82.6465	81.4401	83.8529	83.3079	82.046	84.5697	82.014	80.6736	83.3544	85.6216	83.6796	87.5637	85.5352	83.2756	87.7947	85.5846	83.4556	87.7136	81.4356	79.9218	82.9493	82.4544	80.825	84.0838	80.5275	78.8325	82.2226	84.1613	82.2858	86.0369	84.3043	82.4122	86.1964	83.9518	81.8177	86.086
20	82.523	81.4084	83.6376	83.1855	82.0016	84.3694	81.8916	80.6398	83.1435	85.3147	83.5083	87.1211	85.2362	83.083	87.3893	85.2857	83.286	87.2853	81.3818	79.958	82.8056	82.3983	80.8247	83.972	80.4714	78.874	82.0689	83.932	82.0497	85.8144	84.0804	82.2114	85.9493	83.7279	81.5621	85.8937
21	82.3967	81.3467	83.4466	83.0602	81.9272	84.1932	81.7664	80.5785	82.9542	85.006	83.3124	86.6996	84.9354	82.8673	87.0034	84.9849	83.0932	86.8766	81.3246	79.9638	82.6854	82.3388	80.795	83.8827	80.4119	78.8886	81.9352	83.7015	81.7769	85.6262	83.855	81.9715	85.7386	83.5026	81.2757	85.7294
22	82.2669	81.2529	83.281	82.9315	81.8219	84.0411	81.6377	80.4881	82.7872	84.6955	83.0902	86.3007	84.6324	82.628	86.6368	84.6819	82.8755	86.4882	81.2633	79.9382	82.5885	82.2752	80.7367	83.8136	80.3483	78.8752	81.8213	83.4696	81.4747	85.4644	83.6281	81.6984	85.5578	83.2756	80.9656	85.5857
23	82.1332	81.1274	83.1391	82.7987	81.6871	83.9103	81.5049	80.3693	82.6404	84.3826	82.8409	85.9243	84.3268	82.3658	86.2878	84.3763	82.6328	86.1198	81.1972	79.8822	82.5122	82.2067	80.6527	83.7608	80.2798	78.8343	81.7254	83.2359	81.1518	85.32	83.3993	81.4002	85.3985	83.0468	80.6391	85.4546
24	81.995	80.9738	83.0161	82.6614	81.527	83.7957	81.3675	80.2248	82.5102	84.0671	82.5657	85.5685	84.0183	82.0826	85.954	84.0678	82.366	85.7695	81.1256	79.7994	82.4518	82.1328	80.5467	83.7189	80.2059	78.7679	81.6439	83.0003	80.8165	85.184	83.1684	81.0853	85.2514	82.8159	80.3035	85.3282
25	81.8516	80.7977	82.9054	82.5188	81.3465	83.691	81.2249	80.059	82.3908	83.7487	82.2673	85.23	83.7065	81.7812	85.6318	83.7559	82.0775	85.4344	81.0478	79.6944	82.4011	82.0527	80.4235	83.6819	80.1258	78.6796	81.572	82.7625	80.4765	85.0484	82.935	80.7618	85.1081	82.5825	79.9652	85.1998
26	81.7025	80.6052	82.7998	82.3704	81.1513	83.5895	81.0766	79.8769	82.2762	83.427	81.9499	84.9041	83.391	81.4651	85.3168	83.4404	81.7705	85.1103	80.9631	79.5727	82.3534	81.9657	80.2874	83.6441	80.0388	78.5736	81.504	82.5222	80.1383	84.9062	82.6989	80.4368	84.961	82.3464	79.6299	85.063
27	81.5472	80.402	82.6924	82.2157	80.9464	83.485	80.9218	79.6835	82.1602	83.1017	81.6182	84.5852	83.0714	81.138	85.0048	83.1209	81.4492	84.7926	80.8708	79.4392	82.3024	81.8712	80.1425	83.5999	79.9443	78.4544	81.4342	82.2793	79.8073	84.7514	82.4599	80.1164	84.8034	82.1074	79.3023	84.9125
28	81.3851	80.1929	82.5773	82.054	80.736	83.3721	80.7602	79.4831	82.0373	82.7725	81.277	84.268	82.7474	80.8036	84.6913	82.7969	81.1173	84.4766	80.7703	79.2985	82.2421	81.7684	79.9923	83.5445	79.8415	78.326	81.357	82.0335	79.4882	84.5789	82.2176	79.8054	84.6299	81.8652	78.9867	84.7436
29	81.2155	79.9817	82.4494	81.8849	80.5235	83.2463	80.591	79.2794	81.9027	82.439	80.9307	83.9474	82.4187	80.4651	84.3723	82.4682	80.7785	84.1579	80.6608	79.1541	82.1674	81.6567	79.8398	83.4737	79.7298	78.1921	81.2675	81.7845	79.1848	84.3843	81.9719	79.5082	84.4356	81.6194	78.6866	84.5522
30	81.0381	79.7714	82.3048	81.7077	80.3114	83.1039	80.4138	79.0752	81.7523	82.101	80.5828	83.6192	82.0848	80.1252	84.0444	82.1343	80.4358	83.8327	80.5417	79.0092	82.0742	81.5354	79.6871	83.3838	79.6085	78.0556	81.1614	81.5322	78.9005	84.1639	81.7224	79.2282	84.2165	81.3699	78.4051	84.3346
31	80.8521	79.5641	82.14	81.5217	80.1019	82.9416	80.2279	78.8729	81.5829	81.758	80.236	83.2801	81.7454	79.7858	83.7049	81.7949	80.0913	83.4984	80.4122	78.8656	81.9589	81.4038	79.5359	83.2718	79.4769	77.9188	81.0351	81.2762	78.638	83.9143	81.4688	78.9683	83.9693	81.1163	78.1448	84.0878
32	80.657	79.3615	81.9524	81.3266	79.8961	82.7571	80.0327	78.674	81.3915	81.4099	79.8915	82.9282	81.4001	79.448	83.3521	81.4496	79.7461	83.1531	80.2718	78.725	81.8186	81.2613	79.3874	83.1352	79.3344	77.7831	80.8857	81.0163	78.3997	83.6328	81.211	78.7308	83.6912	80.8585	77.908	83.809
33	80.4522	79.1646	81.7398	81.1216	79.6949	82.5483	79.8278	78.4795	81.176	81.0561	79.5494	82.5629	81.0485	79.1118	82.9853	81.098	79.3997	82.7964	80.1197	78.5881	81.6513	81.107	79.2418	82.9722	79.1801	77.6492	80.711	80.7522	78.1873	83.3171	80.9485	78.5172	83.3799	80.5961	77.6961	83.496
34	80.2372	78.9737	81.5007	80.9063	79.4986	82.314	79.6124	78.2899	80.935	80.6965	79.2079	82.1851	80.6904	78.7757	82.605	80.7399	79.0503	82.4294	79.9551	78.4547	81.4556	80.9404	79.099	82.7818	79.0135	77.5172	80.5098	80.4838	78.0021	82.9656	80.6813	78.3284	83.0342	80.3288	77.5105	83.1471
35	80.0119	78.7884	81.2354	80.6804	79.3063	82.0545	79.3866	78.1045	80.6686	80.3311	78.863	81.7991	80.3256	78.4367	82.2145	80.3751	78.6942	82.056	79.7781	78.3235	81.2327	80.7613	78.9577	82.5649	78.8344	77.3854	80.2834	80.211	77.8434	82.5786	80.4091	78.1633	82.655	80.0567	77.3505	82.7628
36	79.778	78.6069	80.949	80.4458	79.1166	81.775	79.1519	77.9219	80.3819	79.9612	78.5086	81.4138	79.9558	78.0903	81.8213	80.0053	78.3265	81.684	79.5905	78.1919	80.9891	80.5717	78.8157	82.3276	78.6448	77.2513	80.0382	79.9348	77.7063	82.1632	80.1331	78.0162	82.25	79.7806	77.2113	82.3499
37	79.5376	78.4268	80.6484	80.2046	78.9271	81.4821	78.9108	77.7397	80.0818	79.5889	78.1388	81.039	79.5828	77.7317	81.4339	79.6323	77.9431	81.3214	79.3949	78.0565	80.7333	80.3741	78.6705	82.0776	78.4472	77.1113	79.783	79.6561	77.5838	81.7285	79.8542	77.8794	81.8291	79.5018	77.0865	81.917
38	79.2931	78.2453	80.341	79.9591	78.7354	81.1828	78.6652	77.5551	79.7753	79.2158	77.7487	80.6829	79.2086	77.3572	81.0599	79.258	77.5408	80.9752	79.1938	77.9135	80.4742	80.171	78.5193	81.8227	78.2441	76.9615	79.5267	79.3763	77.4682	81.2845	79.5738	77.7442	81.4035	79.2214	76.9689	81.4738
39	79.0466	78.0588	80.0345	79.7115	78.5388	80.8841	78.4176	77.365	79.4702	78.8439	77.3366	80.3512	78.835	76.9648	80.7052	78.8845	77.1192	80.6498	78.9899	77.7589	80.2208	79.965	78.3597	81.5704	78.0381	76.798	79.2783	79.0964	77.3502	80.8426	79.293	77.6001	80.986	78.9406	76.8506	81.0305
40	78.8004	77.864	79.7367	79.4639	78.3348	80.593	78.1701	77.1662	79.1739	78.4749	76.9039	80.046	78.4641	76.555	80.3732	78.5136	76.6803	80.3468	78.7855	77.5897	79.9812	79.7586	78.1899	81.3274	77.8317	76.6178	79.0457	78.8176	77.2197	80.4154	79.013	77.4361	80.5899	78.6605	76.7233	80.5977
41	78.5565	77.658	79.455	79.2187	78.1218	80.3156	77.9249	76.9563	78.8934	78.1108	76.4555	79.7661	78.0977	76.1307	80.0647	78.1472	76.2289	80.0654	78.5832	77.4044	79.7621	79.5544	78.0096	81.0992	77.6275	76.4202	78.8348	78.5409	77.0659	80.016	78.7349	77.2415	80.2283	78.3824	76.5784	80.1865
42	78.3173	77.4394	79.1952	78.978	77.8995	80.0565	77.6842	76.7344	78.6339	77.7534	75.999	79.5078	77.7377	75.6975	79.778	77.7872	75.7716	79.8028	78.3857	77.2043	79.567	79.3548	77.8199	80.8898	77.4279	76.207	78.6489	78.2676	76.8789	79.6564	78.46	77.0089	79.9111	78.1075	76.4083	79.8066
43	78.0849	77.2096	78.9603	78.744	77.6695	79.8186	77.4502	76.502	78.3984	77.4044	75.5428	79.266	77.3861	75.2624	79.5098	77.4356	75.3164	79.5547	78.1953	76.9937	79.397	79.1625	77.6241	80.7008	77.2356	75.9832	78.4879	77.9988	76.6532	79.3444	78.1893	76.737	79.6417	77.8369	76.2083	79.4654
44	77.8616	76.9726	78.7506	78.519	77.4356	79.6025	77.2252	76.2631	78.1872	77.0658	75.0963	79.0354	77.0448	74.8335	79.256	77.0942	74.8717	79.3168	78.0148	76.7794	79.2501	78.9798	77.4274	80.5323	77.0529	75.7562	78.3496	77.7355	76.3904	79.0806	77.9242	76.4322	79.4161	77.5717	75.9782	79.1652
45	77.6495	76.7353	78.5637	78.3052	77.2034	79.407	77.0113	76.0243	77.9983	76.7394	74.6682	78.8106	76.7156	74.4193	79.0119	76.7651	74.4458	79.0843	77.8465	76.5702	79.1228	78.8094	77.2364	80.3825	76.8825	75.5348	78.2303	77.479	76.1	78.858	77.6657	76.1069	79.2244	77.3132	75.7232	78.9032
46	77.4508	76.5056	78.3961	78.1047	76.9797	79.2297	76.8108	75.7931	77.8285	76.427	74.267	78.587	76.4006	74.0278	78.7733	76.45	74.0471	78.853	77.693	76.375	79.011	78.6538	77.0586	80.2491	76.7269	75.3281	78.1258	77.2304	75.7964	78.6643	77.415	75.7761	79.0539	77.0625	75.4534	78.6716
47	77.2678	76.2919	78.2437	77.9198	76.7717	79.0678	76.6259	75.5775	77.6744	76.1304	73.9005	78.3604	76.1016	73.6669	78.5363	76.151	73.683	78.6191	77.5569	76.2031	78.9106	78.5155	76.9017	80.1294	76.5886	75.1448	78.0324	76.9907	75.4956	78.4859	77.1734	75.4544	78.8923	76.8209	75.1816	78.4602
48	77.1027	76.1023	78.103	77.7527	76.5867	78.9187	76.4589	75.3852	77.5325	75.8516	73.5755	78.1276	75.8205	73.3432	78.2978	75.87	73.3606	78.3794	77.4407	76.0629	78.8185	78.3971	76.7734	80.0208	76.4702	74.9933	77.9471	76.7613	75.2121	78.3104	76.9419	75.155	78.7288	76.5894	74.9206	78.2582
49	76.9576	75.9438	77.9713	77.6056	76.4311	78.7802	76.3118	75.2229	77.4006	75.5923	73.2982	77.8863	75.5593	73.0627	78.056	75.6088	73.086	78.1316	77.3469	75.9617	78.7322	78.301	76.6806	79.9215	76.3741	74.8805	77.8678	76.543	74.9585	78.1276	76.7218	74.889	78.5547	76.3693	74.6824	78.0563
50	76.8337	75.8208	77.8467	77.4798	76.3091	78.6506	76.186	75.0949	77.277	75.3537	73.0712	77.6362	75.3193	72.8278	77.8108	75.3688	72.8622	77.8754	77.2769	75.9036	78.6502	78.2287	76.6271	79.8303	76.3018	74.8101	77.7934	76.3368	74.7428	77.9308	76.5138	74.6633	78.3643	76.1614	74.475	77.8477
51	76.7284	75.7292	77.7276	77.3725	76.2169	78.5282	76.0787	74.9972	77.1601	75.1349	72.8885	77.3813	75.0993	72.6329	77.5658	75.1488	72.6834	77.6142	77.2271	75.8825	78.5717	78.1765	76.6073	79.7458	76.2496	74.7761	77.7232	76.1414	74.5631	77.7197	76.3169	74.4756	78.1581	75.9644	74.2974	77.6313
52	76.6378	75.6622	77.6134	77.2801	76.1482	78.4119	75.9862	74.9231	77.0493	74.934	72.7408	77.1271	74.8977	72.4695	77.326	74.9472	72.541	77.3533	77.1927	75.8887	78.4967	78.1399	76.6126	79.6672	76.213	74.7687	77.6572	75.9553	74.4135	77.4972	76.1294	74.3197	77.939	75.7769	74.1445	77.4093
53	76.5582	75.6122	77.5043	77.1987	76.0958	78.3016	75.9049	74.8652	76.9445	74.7493	72.6184	76.8802	74.7127	72.3282	77.0971	74.7621	72.4257	77.0986	77.1689	75.9115	78.4263	78.1141	76.6331	79.595	76.1871	74.7777	77.5965	75.7771	74.2863	77.2678	75.9498	74.1881	77.7116	75.5974	74.0091	77.1856
54	76.4859	75.5708	77.401	77.1248	76.0522	78.1974	75.8309	74.8156	76.8463	74.5793	72.5108	76.6477	74.5425	72.1996	76.8854	74.5919	72.3274	76.8565	77.151	75.9395	78.3625	78.0943	76.6586	79.53	76.1674	74.7923	77.5425	75.605	74.1726	77.0375	75.7767	74.0724	77.481	75.4243	73.8828	76.9657
55	76.417	75.5295	77.3045	77.0546	76.0095	78.0996	75.7607	74.7661	76.7553	74.422	72.4075	76.4366	74.3854	72.0745	76.6964	74.4349	72.2362	76.6335	77.1342	75.9609	78.3074	78.076	76.6786	79.4734	76.1491	74.8015	77.4967	75.4377	74.0624	76.813	75.6085	73.9637	77.2534	75.2561	73.7563	76.7558
56	76.3478	75.4799	77.2158	76.9844	75.9602	78.0086	75.6905	74.7092	76.6718	74.276	72.2988	76.2531	74.2397	71.9448	76.5347	74.2892	72.1428	76.4357	77.1137	75.9643	78.263	78.0544	76.683	79.4257	76.1275	74.7951	77.4599	75.2735	73.9456	76.6014	75.4437	73.8528	77.0346	75.0912	73.6208	76.5617
57	76.2746	75.4144	77.1347	76.9105	75.8974	77.9236	75.6167	74.6381	76.5953	74.1394	72.1769	76.1018	74.1037	71.8044	76.4031	74.1532	72.039	76.2674	77.0847	75.9399	78.2294	78.0248	76.6632	79.3863	76.0979	74.7644	77.4313	75.1109	73.8129	76.409	75.2807	73.7313	76.8302	74.9282	73.4685	76.388
58	76.1936	75.3274	77.0598	76.8292	75.8156	77.8429	75.5354	74.5472	76.5235	74.0105	72.037	75.9841	73.9757	71.6497	76.3016	74.0251	71.9194	76.1309	77.0424	75.8809	78.204	77.9825	76.6125	79.3524	76.0556	74.703	77.4081	74.9484	73.6573	76.2396	75.1181	73.5923	76.6438	74.7656	73.2946	76.2366
59	76.101	75.2149	76.9871	76.7369	75.7107	77.763	75.443	74.4332	76.4528	73.8877	71.8776	75.8978	73.8538	71.4801	76.2275	73.9033	71.7814	76.0252	76.9822	75.7834	78.181	77.9228	76.5268	79.3187	75.9958	74.6068	77.3849	74.7845	73.4755	76.0934	74.9542	73.4317	76.4766	74.6017	73.0975	76.1059
60	75.9931	75.0753	76.9109	76.6297	75.5807	77.6788	75.3359	74.2941	76.3777	73.7692	71.7009	75.8376	73.7364	71.2973	76.1755	73.7859	71.6257	75.946	76.8991	75.6466	78.1517	77.841	76.4043	79.2776	75.9141	74.4742	77.3539	74.6175	73.2686	75.9664	74.7875	73.2486	76.3265	74.4351	72.8791	75.991
61	75.8661	74.9084	76.8239	76.5041	75.4245	77.5837	75.2102	74.1292	76.2913	73.6534	71.5116	75.7952	73.6217	71.1055	76.138	73.6712	71.4559	75.8865	76.7885	75.4715	78.1054	77.7324	76.2449	79.2199	75.8055	74.3051	77.3058	74.4459	73.0409	75.8509	74.6166	73.0449	76.1884	74.2641	72.6439	75.8844
62	75.7163	74.7149	76.7178	76.3562	75.2421	77.4704	75.0624	73.9386	76.1861	73.5385	71.3158	75.7612	73.5081	70.9095	76.1067	73.5576	71.2773	75.8379	76.6455	75.2599	78.0311	77.5923	76.0493	79.1352	75.6654	74.1003	77.2305	74.2683	72.799	75.7375	74.4399	72.8252	76.0547	74.0874	72.3976	75.7773
63	75.5399	74.4953	76.5846	76.1825	75.0337	77.3313	74.8886	73.7226	76.0547	73.4229	71.1203	75.7254	73.3937	70.715	76.0724	73.4432	71.0959	75.7905	76.4654	75.0131	77.9176	77.416	75.8187	79.0133	75.4891	73.8604	77.1178	74.083	72.5496	75.6164	74.2559	72.5948	75.9169	73.9034	72.1465	75.6602
64	75.334	74.2505	76.4174	75.9799	74.7999	77.1598	74.686	73.4815	75.8905	73.305	70.9311	75.6789	73.2772	70.5273	76.0271	73.3267	70.9179	75.7354	76.2443	74.7326	77.7559	77.1998	75.5543	78.8453	75.2729	73.5864	76.9594	73.8888	72.2988	75.4787	74.0633	72.3594	75.7671	73.7108	71.8961	75.5255
65	75.0984	73.9822	76.2147	75.7484	74.5424	76.9545	74.4546	73.217	75.6921	73.1848	70.7522	75.6173	73.1583	70.3497	75.9669	73.2078	70.7475	75.6681	75.9824	74.4207	77.5441	76.9437	75.2583	78.6292	75.0168	73.2804	76.7532	73.6856	72.0504	75.3208	73.862	72.1228	75.6013	73.5095	71.6494	75.3697
66	74.8341	73.6913	75.9769	75.4889	74.2624	76.7154	74.195	72.9302	75.4598	73.0622	70.5858	75.5385	73.037	70.1841	75.89	73.0865	70.5871	75.586	75.6807	74.0789	77.2825	76.6489	74.9326	78.3652	74.722	72.9442	76.4997	73.4738	71.8062	75.1414	73.6524	71.8871	75.4176	73.2999	71.4079	75.1919
67	74.5417	73.3784	75.7051	75.202	73.9604	76.4436	73.9081	72.6215	75.1948	72.9373	70.433	75.4416	72.9135	70.0315	75.7956	72.963	70.4381	75.4879	75.3404	73.7078	76.9729	76.3163	74.578	78.0545	74.3894	72.5786	76.2001	73.2534	71.5665	74.9404	73.4346	71.6532	75.2159	73.0821	71.1719	74.9922
68	74.2222	73.0431	75.4012	74.8885	73.6364	76.1407	73.5947	72.2908	74.8986	72.8102	70.294	75.3265	72.7878	69.892	75.6836	72.8373	70.301	75.3735	74.9624	73.3074	76.6173	75.947	74.1947	77.6992	74.02	72.1835	75.8566	73.0249	71.3307	74.719	73.2088	71.4207	74.9969	72.8563	70.9408	74.7717
69	73.8761	72.6848	75.0674	74.5493	73.2899	75.8087	73.2554	71.9375	74.5734	72.681	70.1683	75.1937	72.6599	69.7653	75.5546	72.7094	70.1755	75.2434	74.5479	72.8769	76.2189	75.542	73.7822	77.3018	73.6151	71.7584	75.4717	72.7883	71.0975	74.4791	72.9753	71.1881	74.7624	72.6228	70.7133	74.5323
70	73.5044	72.3022	74.7066	74.185	72.9197	75.4503	72.8911	71.5605	74.2218	72.5497	70.0547	75.0446	72.53	69.6503	75.4097	72.5795	70.0604	75.0986	74.0979	72.4148	75.781	75.1024	73.3392	76.8656	73.1755	71.3023	75.0487	72.5439	70.8643	74.2235	72.7343	70.9533	74.5152	72.3818	70.4871	74.2764
71	73.1078	71.8936	74.322	73.7964	72.5242	75.0686	72.5025	71.1585	73.8466	72.4163	69.9516	74.881	72.3981	69.5456	75.2506	72.4475	69.954	74.941	73.6135	71.9193	75.3078	74.6293	72.8641	76.3945	72.7024	70.8135	74.5913	72.292	70.6278	73.9562	72.486	70.713	74.259	72.1335	70.2594	74.0077
72	72.687	71.4569	73.9171	73.3843	72.1016	74.6669	72.0904	70.7296	73.4513	72.281	69.8565	74.7055	72.2642	69.4489	75.0794	72.3136	69.8541	74.7732	73.0959	71.3878	74.804	74.1237	72.3545	75.8929	72.1968	70.2899	74.1037	72.0328	70.3838	73.6818	72.2307	70.4631	73.9982	71.8782	70.0261	73.7303
73	72.243	70.99	73.4959	72.9494	71.6497	74.249	71.6555	70.2719	73.0392	72.1438	69.7664	74.5212	72.1284	69.3576	74.8992	72.1778	69.7575	74.5982	72.546	70.8174	74.2745	73.5866	71.8076	75.3656	71.6597	69.7291	73.5903	71.7665	70.1269	73.4061	71.9685	70.1988	73.7383	71.6161	69.7826	73.4495
74	71.7763	70.4906	73.0621	72.4925	71.1662	73.8187	71.1986	69.7834	72.6139	72.0047	69.6772	74.3323	71.9908	69.2684	74.7131	72.0402	69.6603	74.4202	71.9649	70.205	73.7247	73.0191	71.2204	74.8178	71.0922	69.1286	73.0558	71.4934	69.8512	73.1356	71.6998	69.9145	73.4851	71.3473	69.5233	73.1713
75	71.2879	69.9565	72.6193	72.0143	70.6489	73.3797	70.7204	69.2621	72.1788	71.8639	69.5842	74.1437	71.8514	69.1772	74.5255	71.9009	69.5578	74.2439	71.3537	69.5477	73.1597	72.4223	70.5898	74.2547	70.4954	68.4857	72.505	71.2137	69.5503	72.877	71.4247	69.6048	73.2446	71.0723	69.2422	72.9024
76	70.7784	69.3861	72.1707	71.5156	70.0962	72.9351	70.2218	68.7065	71.7371	71.7214	69.4817	73.9611	71.7103	69.0795	74.3412	71.7598	69.4448	74.0748	70.7135	68.8429	72.5842	71.7971	69.9128	73.6814	69.8702	67.7982	71.9422	70.9276	69.2182	72.6371	71.1435	69.2646	73.0224	70.791	68.9329	72.6492
77	70.2488	68.7786	71.7189	70.9972	69.5068	72.4877	69.7034	68.1155	71.2912	71.5772	69.3632	73.7911	71.5676	68.9697	74.1655	71.6171	69.3151	73.919	70.0454	68.0885	72.0022	71.1447	69.1873	73.102	69.2178	67.0642	71.3713	70.6354	68.85	72.4209	70.8564	68.89	72.8229	70.5039	68.5901	72.4178
78	69.6996	68.1338	71.2655	70.4599	68.8804	72.0393	69.166	67.4888	70.8432	71.4314	69.222	73.6408	71.4233	68.8422	74.0044	71.4728	69.1627	73.7828	69.3504	67.2838	71.417	70.466	68.4119	72.5202	68.5391	66.2827	70.7955	70.3374	68.4427	72.232	70.5636	68.4783	72.6489	70.2111	68.2096	72.2127
79	69.1318	67.4522	70.8115	69.9043	68.2174	71.5911	68.6104	66.8264	70.3944	71.2841	69.0514	73.5168	71.2775	68.691	73.864	71.327	68.9817	73.6723	68.6296	66.4288	70.8304	69.7622	67.5863	71.9382	67.8353	65.4533	70.2173	70.0336	67.9953	72.072	70.2653	68.029	72.5017	69.9129	67.7891	72.0366
80	68.5461	66.7347	70.3575	69.3312	67.5186	71.1438	68.0374	66.1291	69.9456	71.1354	68.8458	73.425	71.1303	68.5106	73.7499	71.1797	68.7671	73.5924	67.8841	65.5244	70.2438	69.0343	66.7112	71.3574	67.1074	64.5767	69.6381	69.7245	67.5087	71.9403	69.9619	67.5426	72.3811	69.6094	67.3285	71.8903
81	67.9433	65.9831	69.9035	68.7415	66.7855	70.6974	67.4476	65.3982	69.497	70.9853	68.6011	73.3694	70.9816	68.2965	73.6668	71.0311	68.5158	73.5465	67.1149	64.5725	69.6574	68.2833	65.7882	70.7784	66.3564	63.6539	69.0589	69.4102	66.9848	71.8355	69.6534	67.0208	72.2859	69.3009	66.8289	71.7729
82	67.3242	65.1989	69.4494	68.1358	66.0198	70.2517	66.8419	64.635	69.0488	70.8338	68.3157	73.3519	70.8317	68.0454	73.6179	70.8812	68.2261	73.5362	66.3232	63.5751	69.0714	67.5103	64.8194	70.2012	65.5834	62.6867	68.4801	69.0909	66.4264	71.7554	69.3401	66.4658	72.2144	68.9877	66.2926	71.6827
83	66.6894	64.384	68.9948	67.5149	65.2234	69.8063	66.221	63.8414	68.6007	70.6811	67.9899	73.3723	70.6805	67.7561	73.6049	70.73	67.8985	73.5614	65.51	62.5348	68.4852	66.7163	63.8073	69.6253	64.7894	61.6773	67.9015	68.7669	65.8363	71.6974	69.0223	65.8802	72.1645	68.6699	65.7225	71.6172
84	66.0399	63.5404	68.5394	66.8796	64.3981	69.361	65.5857	63.019	68.1525	70.5271	67.6254	73.4288	70.5281	67.4285	73.6276	70.5776	67.5344	73.6207	64.6764	61.4542	67.8986	65.9024	62.7545	69.0503	63.9755	60.6279	67.3231	68.4384	65.2175	71.6593	68.7002	65.2663	72.1341	68.3477	65.1215	71.574
85	65.3764	62.6699	68.083	66.2306	63.5459	68.9153	64.9368	62.1696	67.7039	70.372	67.2254	73.5187	70.3745	67.0644	73.6847	70.424	67.1365	73.7115	63.8234	60.3358	67.311	65.0696	61.6638	68.4754	63.1427	59.541	66.7444	68.1057	64.5725	71.6389	68.374	64.6267	72.1214	68.0215	64.4924	71.5507
86	64.6997	61.7742	67.6252	65.5687	62.6686	68.4689	64.2749	61.2951	67.2546	70.2159	66.7931	73.6387	70.2199	66.6661	73.7738	70.2694	66.7076	73.8312	62.9522	59.1823	66.722	64.219	60.5378	67.9002	62.2921	58.419	66.1652	67.769	63.9037	71.6343	68.044	63.9635	72.1244	67.6915	63.8379	71.5451
87	64.0105	60.8552	67.1658	64.8947	61.7679	68.0215	63.6009	60.3972	66.8046	70.0587	66.3319	73.7856	70.0643	66.2364	73.8922	70.1138	66.2507	73.9768	62.0637	57.9962	66.1313	63.3516	59.3791	67.3242	61.4247	57.2644	65.5851	67.4285	63.2132	71.6438	67.7103	63.2787	72.1418	67.3578	63.1603	71.5552
88	63.3096	59.9144	66.7048	64.2093	60.8456	67.573	62.9155	59.4774	66.3535	69.9006	65.8449	73.9563	69.9078	65.7783	74.0372	69.9572	65.7688	74.1457	61.1592	56.7798	65.5386	62.4685	58.19	66.747	60.5416	56.0793	65.0039	67.0845	62.503	71.666	67.3732	62.5743	72.172	67.0207	62.4619	71.5795
89	62.5979	58.9537	66.2421	63.5133	59.9033	67.1233	62.2194	58.5376	65.9013	69.7416	65.3351	74.1481	69.7503	65.2949	74.2058	69.7998	65.2643	74.3352	60.2396	55.5354	64.9438	61.5707	56.973	66.1684	59.6438	54.8663	64.4213	66.7372	61.7749	71.6995	67.0329	61.8519	72.2138	66.6804	61.7445	71.6163
90	61.876	57.9744	65.7776	62.8074	58.9426	66.6722	61.5135	57.5791	65.448	69.5818	64.805	74.3586	69.5921	64.7887	74.3954	69.6415	64.7399	74.5431	59.306	54.2653	64.3467	60.6593	55.7304	65.5882	58.7324	53.6274	63.8374	66.3868	61.0305	71.7432	66.6896	61.1132	72.2661	66.3371	61.01	71.6643
91	61.1448	56.9781	65.3114	62.0924	57.965	66.2198	60.7985	56.6037	64.9934	69.4212	64.2569	74.5854	69.433	64.2624	74.6037	69.4825	64.1977	74.7674	58.3595	52.9715	63.7475	59.7353	54.4642	65.0063	57.8084	52.3648	63.252	66.0336	60.2712	71.796	66.3437	60.3596	72.3277	65.9912	60.26	71.7224
92	60.405	55.9664	64.8437	61.369	56.972	65.766	60.0752	55.6126	64.5377	69.2599	63.693	74.8268	69.2733	63.7182	74.8284	69.3228	63.6396	75.0061	57.4012	51.6563	63.1462	58.7997	53.1766	64.4228	56.8728	51.0806	62.6651	65.6778	59.4985	71.8571	65.9952	59.5925	72.3979	65.6427	59.496	71.7895
93	59.6575	54.9406	64.3744	60.6381	55.9651	65.3111	59.3442	54.6075	64.0809	69.098	63.1149	75.0811	69.113	63.1582	75.0678	69.1625	63.0674	75.2576	56.4322	50.3215	62.5429	57.8537	51.8697	63.8378	55.9268	49.7768	62.0768	65.3197	58.7138	71.9256	65.6445	58.8133	72.4756	65.292	58.7194	71.8646
94	58.9029	53.9021	63.9037	59.9003	54.9456	64.855	58.6064	53.5897	63.6232	68.9355	62.5244	75.3466	68.9521	62.5843	75.3199	69.0016	62.4828	75.5204	55.4535	48.9693	61.9377	56.8982	50.5453	63.2512	54.9713	48.4554	61.4873	64.9594	57.9182	72.0006	65.2917	58.0232	72.5602	64.9392	57.9315	71.9469
95	58.1421	52.8524	63.4318	59.1565	53.9149	64.398	57.8626	52.5607	63.1645	68.7725	61.923	75.622	68.7907	61.9982	75.5832	68.8402	61.8872	75.7931	54.4662	47.6014	61.331	55.9344	49.2054	62.6633	54.0075	47.1183	60.8966	64.5973	57.1131	72.0814	64.9371	57.2234	72.6507	64.5846	57.1337	72.0354
96	57.3759	51.7929	62.959	58.4073	52.8744	63.9401	57.1134	51.5217	62.7052	68.6091	61.3121	75.906	68.6288	61.4014	75.8563	68.6783	61.2821	76.0745	53.4714	46.2199	60.7229	54.9632	47.852	62.0744	53.0363	45.7675	60.3051	64.2334	56.2995	72.1674	64.5809	56.4152	72.7466	64.2284	56.3272	72.1296
97	56.605	50.7247	62.4853	57.6536	51.8255	63.4816	56.3597	50.4741	62.2453	68.4453	60.693	76.1975	68.4666	60.7955	76.1378	68.5161	60.6688	76.3634	52.4701	44.8265	60.1137	53.9857	46.4868	61.4846	52.0588	44.4047	59.7129	63.8682	55.4786	72.2578	64.2233	55.5997	72.847	63.8708	55.5132	72.2285
98	55.8302	49.6494	62.0111	56.896	50.7694	63.0227	55.6022	49.4193	61.7851	68.2811	60.0669	76.4953	68.3041	60.1817	76.4265	68.3536	60.0484	76.6587	51.4634	43.4231	59.5037	53.003	45.1118	60.8942	51.0761	43.0319	59.1202	63.5018	54.6516	72.352	63.8646	54.7779	72.9513	63.5122	54.6928	72.3315
99	55.0524	48.5682	61.5365	56.1355	49.7075	62.5635	54.8416	48.3585	61.3248	68.1167	59.435	76.7984	68.1413	59.5613	76.7212	68.1908	59.4222	76.9593	50.4525	42.0116	58.8933	52.016	43.7286	60.3034	50.0891	41.6509	58.5274	63.1345	53.8196	72.4494	63.505	53.9511	73.059	63.1526	53.8671	72.438
100	54.2721	47.4825	61.0618	55.3727	48.641	62.1043	54.0788	47.2931	60.8645	67.9522	58.7985	77.1058	67.9783	58.9357	77.0209	68.0278	58.7913	77.2643	49.4383	40.5938	58.2828	51.026	42.3392	59.7127	49.0991	40.2634	57.9347	62.7665	52.9836	72.5493	63.1448	53.1203	73.1693	62.7923	53.0373	72.5472
