# Supplementary material for: Belgian population norms for the EQ-5D-5L, 2018
Source: Qual Life Res. 2021 Aug 18;31(2):527–37. doi: 10.1007/s11136-021-02971-6 (PMC8847192; doi:10.1007/s11136-021-02971-6)
Supplement: Supplementary file 2 — Supplementary file2 (XLSX 344 kb) [file 11136_2021_2971_MOESM2_ESM.xlsx]

## Sheet: MO
EQ-5D-5L population norms for the Belgian population aged 15 years and older in 2018, by age, sex, and region.
	BELGIUM									BRUSSELS									FLANDERS									WALLONIA
	Both			Male			Female			Both			Male			Female			Both			Male			Female			Both			Male			Female
Age	mean	lwr	upr	mean	lwr	upr	mean	lwr	upr	mean	lwr	upr	mean	lwr	upr	mean	lwr	upr	mean	lwr	upr	mean	lwr	upr	mean	lwr	upr	mean	lwr	upr	mean	lwr	upr	mean	lwr	upr
ALL	0.190134	0.177802	0.20311	0.163564	0.147483	0.181027	0.215058	0.198398	0.232711	0.188793	0.169495	0.209734	0.162423	0.142184	0.184922	0.213346	0.189694	0.239077	0.171042	0.155318	0.188003	0.146886	0.130149	0.165367	0.194067	0.173861	0.216007	0.225045	0.201105	0.25094	0.194732	0.168398	0.224075	0.252728	0.225536	0.282004
15	0.0894671	0.0565615	0.138702	0.0782143	0.048273	0.124301	0.100723	0.0641083	0.154791	0.103666	0.0650945	0.161154	0.0904299	0.0554533	0.144102	0.115573	0.0729299	0.178353	0.085292	0.0532341	0.133925	0.0747818	0.0458269	0.119735	0.0960335	0.0601685	0.149868	0.0921602	0.0543654	0.152006	0.08066	0.0461709	0.137206	0.103396	0.0616007	0.168457
16	0.0873731	0.0569325	0.131815	0.0763586	0.048563	0.118089	0.0983902	0.0644975	0.147289	0.101302	0.0654355	0.153596	0.0883418	0.0557283	0.137267	0.112976	0.0732759	0.170235	0.083307	0.053512	0.127458	0.0730255	0.0460622	0.113888	0.0938287	0.0604463	0.142844	0.0900331	0.0545856	0.14497	0.0787793	0.0463358	0.130823	0.101043	0.0618455	0.160825
17	0.0853492	0.0572625	0.12538	0.0745662	0.0488162	0.112295	0.0961344	0.0648369	0.140273	0.0990126	0.0657159	0.146534	0.0863218	0.0559514	0.130892	0.110461	0.0735502	0.162644	0.0813839	0.0537363	0.121431	0.0713248	0.0462519	0.108444	0.0916914	0.0606596	0.136295	0.0879841	0.0547603	0.138413	0.0769685	0.046462	0.124882	0.0987752	0.0620381	0.153702
18	0.0834182	0.0575511	0.119438	0.0728568	0.049033	0.106954	0.0939809	0.0651258	0.133791	0.0968235	0.0659348	0.140014	0.0843916	0.0561229	0.125013	0.108055	0.073752	0.155633	0.0795403	0.0539039	0.115876	0.0696951	0.0463939	0.10343	0.0896413	0.0608045	0.130257	0.0860431	0.0548981	0.132382	0.075254	0.0465574	0.119423	0.0966259	0.0621879	0.147142
19	0.0816008	0.0577975	0.114021	0.0712489	0.0492136	0.102091	0.0919529	0.0653627	0.12788	0.0947572	0.0660919	0.13407	0.082571	0.0562438	0.119659	0.105783	0.073881	0.149241	0.077792	0.0540116	0.110816	0.0681503	0.046486	0.0988641	0.087696	0.0608778	0.124759	0.0842378	0.0550082	0.126913	0.0736602	0.0466311	0.114475	0.0946258	0.0623052	0.141188
20	0.0799161	0.0580002	0.109154	0.069759	0.0493581	0.0977253	0.0900721	0.0655458	0.122572	0.0928342	0.0661875	0.12873	0.0808783	0.0563157	0.11485	0.103668	0.0739379	0.143501	0.0761537	0.0540569	0.106268	0.0667032	0.046527	0.094759	0.0858721	0.0608769	0.119821	0.082594	0.0551016	0.122032	0.0722096	0.0466935	0.110059	0.0928036	0.0624017	0.135871
21	0.078382	0.058158	0.104856	0.0684026	0.0494673	0.0938703	0.0883583	0.0656738	0.11789	0.091074	0.0662239	0.12401	0.0793303	0.0563425	0.110598	0.101732	0.0739264	0.138434	0.0746388	0.0540391	0.102242	0.0653654	0.0465171	0.0911212	0.0841846	0.0608021	0.115454	0.0811353	0.0551911	0.117755	0.0709229	0.0467566	0.106188	0.091186	0.062492	0.131211
22	0.0770149	0.058271	0.101141	0.0671942	0.0495436	0.0905341	0.0868302	0.0657471	0.11385	0.0894945	0.0662072	0.119921	0.077943	0.0563308	0.106908	0.0999959	0.0738541	0.134052	0.0732598	0.0539605	0.0987412	0.064148	0.0464589	0.0879509	0.0826477	0.0606571	0.111663	0.0798848	0.0552928	0.114093	0.0698202	0.0468351	0.102868	0.0897987	0.0625934	0.127224
23	0.0758307	0.0583426	0.0980153	0.0661476	0.0495924	0.0877194	0.0855058	0.0657707	0.110462	0.0881131	0.0661483	0.116462	0.0767314	0.0562915	0.103777	0.0984781	0.073735	0.130356	0.0720285	0.053828	0.0957602	0.0630611	0.046359	0.0852428	0.0812745	0.0604513	0.108443	0.0788646	0.0554261	0.111049	0.0689209	0.0469469	0.1001	0.0886667	0.0627281	0.123913
24	0.0748452	0.058382	0.0954803	0.0652764	0.0496234	0.0854232	0.0844027	0.0657561	0.107727	0.0869467	0.0660653	0.113625	0.0757103	0.0562409	0.101197	0.0971982	0.0735908	0.127338	0.0709562	0.0536544	0.0932874	0.0621147	0.0462285	0.0829851	0.0800781	0.0602009	0.10578	0.0780973	0.0556156	0.108622	0.0682448	0.047113	0.0978812	0.0878151	0.0629232	0.121279
25	0.0740742	0.0584059	0.0935282	0.0645944	0.0496526	0.0836368	0.0835386	0.0657241	0.105636	0.0860122	0.0659845	0.111394	0.0748947	0.0562018	0.0991519	0.0961752	0.0734525	0.124979	0.0700543	0.0534595	0.0913034	0.0613185	0.046084	0.0811607	0.0790711	0.0599299	0.103652	0.0776063	0.0558907	0.106805	0.0678123	0.0473591	0.0962066	0.0872702	0.0632119	0.119319
26	0.073534	0.0584413	0.0921432	0.0641159	0.0497029	0.0823461	0.0829323	0.0657065	0.10417	0.0853273	0.0659407	0.109744	0.0743	0.0562029	0.0976216	0.0954289	0.0733599	0.123254	0.0693342	0.0532704	0.0897825	0.0606826	0.0459481	0.0797473	0.0782665	0.0596698	0.10203	0.0774168	0.0562869	0.105591	0.0676455	0.0477149	0.0950701	0.08706	0.0636339	0.118023
27	0.0732426	0.0585249	0.0913025	0.0638565	0.0498048	0.0815324	0.0826034	0.0657463	0.103305	0.0849106	0.0659766	0.108646	0.0739427	0.0562795	0.096582	0.0949804	0.0733611	0.122131	0.0688079	0.0531205	0.088694	0.0602175	0.0458479	0.0787192	0.0776777	0.0594584	0.100881	0.0775568	0.0568455	0.104974	0.0677691	0.0482151	0.0944663	0.0872158	0.0642356	0.117386
28	0.0732194	0.0587029	0.0909787	0.0638333	0.049995	0.0811746	0.0825741	0.0658956	0.103008	0.0847826	0.0661414	0.10807	0.0738408	0.0564718	0.0960084	0.0948524	0.0735107	0.121577	0.0684883	0.0530479	0.0880053	0.0599345	0.045815	0.0780493	0.0773194	0.0593384	0.100169	0.078058	0.0576142	0.104948	0.0682112	0.0488994	0.0943928	0.0877727	0.0650701	0.117401
29	0.0734867	0.0590284	0.0911434	0.0640658	0.0503161	0.0812515	0.0828688	0.0662136	0.10325	0.0849659	0.066489	0.107983	0.0740145	0.0568238	0.0958774	0.0950706	0.0738677	0.121561	0.0683899	0.0530938	0.0876847	0.059846	0.0458834	0.0777114	0.0772074	0.0593546	0.0998599	0.0789572	0.0586471	0.105513	0.0690042	0.0498127	0.0948516	0.0887715	0.0661978	0.11807
30	0.0740698	0.059559	0.091771	0.0645765	0.0508143	0.081745	0.083516	0.0667639	0.104003	0.0854866	0.0670768	0.108362	0.0744872	0.0573828	0.0961698	0.0956638	0.0744942	0.122056	0.0685285	0.0533009	0.0877036	0.0599663	0.0460888	0.077682	0.0773597	0.0595535	0.0999241	0.080298	0.0600055	0.106674	0.0701868	0.0510064	0.0958513	0.0902601	0.0676864	0.119398
31	0.0749986	0.0603559	0.0928426	0.0653916	0.0515393	0.0826427	0.0845486	0.0676128	0.105248	0.0863746	0.0679643	0.109188	0.0752854	0.0581987	0.0968727	0.0966653	0.0754546	0.123045	0.0689227	0.0537126	0.0880391	0.0603114	0.0464676	0.0779425	0.0777966	0.0599818	0.100338	0.082132	0.0617589	0.108449	0.071805	0.052539	0.0974095	0.0922952	0.0696128	0.121404
32	0.0763079	0.061483	0.094348	0.0665422	0.0525438	0.0839395	0.0860052	0.0688295	0.106974	0.0876649	0.069214	0.110451	0.0764408	0.0593241	0.0979817	0.0981139	0.076816	0.12452	0.0695936	0.054373	0.0886754	0.0609002	0.047057	0.0784804	0.0785419	0.0606866	0.101085	0.0845213	0.0639871	0.110865	0.0739142	0.0544779	0.0995548	0.0949447	0.0720642	0.124118
33	0.0780392	0.0630081	0.0962876	0.068065	0.0538845	0.0856396	0.0879315	0.0704874	0.109186	0.0893986	0.0708917	0.112154	0.0779902	0.0608148	0.0995025	0.100055	0.0786491	0.126487	0.0705662	0.055327	0.0896048	0.0617546	0.0478952	0.0792906	0.0796228	0.061716	0.10216	0.0875406	0.0667822	0.113964	0.0765814	0.0569013	0.10233	0.0982902	0.075141	0.127587
34	0.080242	0.0650049	0.0986738	0.0700043	0.0556231	0.0877582	0.0903819	0.0726654	0.111897	0.0916241	0.0730674	0.114312	0.0799778	0.0627305	0.101454	0.102542	0.081029	0.128966	0.0718696	0.056621	0.0908294	0.0629006	0.0490214	0.0803772	0.0810717	0.0631199	0.103565	0.0912807	0.0702513	0.117807	0.079888	0.0599009	0.105794	0.10243	0.078959	0.131879
35	0.0829755	0.0675549	0.101533	0.0724129	0.0578282	0.0903231	0.0934211	0.0754509	0.115138	0.0943992	0.0758161	0.116961	0.0824557	0.0651353	0.10387	0.105639	0.0840359	0.131996	0.0735383	0.0583039	0.0923628	0.0643686	0.0504766	0.0817546	0.0829262	0.0649502	0.105317	0.0958514	0.0745198	0.122481	0.0839334	0.063584	0.11003	0.107484	0.0836529	0.137087
36	0.0863104	0.0707498	0.104907	0.0753543	0.0605767	0.0933785	0.0971266	0.0789416	0.11896	0.0977922	0.0792171	0.120155	0.0854865	0.0680967	0.106808	0.109421	0.0877545	0.13564	0.075613	0.0604263	0.0942337	0.0661949	0.0523029	0.083452	0.0852312	0.0672611	0.107449	0.101386	0.0797328	0.128102	0.0888384	0.068076	0.115151	0.113594	0.0893775	0.14334
37	0.0903129	0.074671	0.108846	0.0788886	0.0639363	0.0969754	0.10157	0.0832232	0.123417	0.101866	0.0833282	0.123969	0.0891277	0.071664	0.110341	0.113954	0.0922461	0.139983	0.0781301	0.0630242	0.0964839	0.0684122	0.0545293	0.0855101	0.088026	0.0700909	0.110008	0.108018	0.0860246	0.134804	0.0947241	0.073494	0.121284	0.120903	0.0962727	0.150782
38	0.0949839	0.0793167	0.113365	0.0830184	0.067905	0.101131	0.106749	0.0882898	0.128525	0.106614	0.0881054	0.128463	0.093377	0.0758012	0.114523	0.119232	0.0974625	0.145083	0.0810831	0.066068	0.0991484	0.0710155	0.0571294	0.0879618	0.0913024	0.0734072	0.113028	0.115774	0.0934052	0.142657	0.101622	0.0798527	0.128496	0.129434	0.104341	0.159487
39	0.100303	0.0846487	0.118477	0.0877279	0.0724505	0.105859	0.11264	0.0940966	0.134296	0.112011	0.0934559	0.133706	0.0982133	0.0804321	0.119415	0.125223	0.103305	0.151008	0.0844531	0.0694989	0.102271	0.0739889	0.0600528	0.0908465	0.0950384	0.0771475	0.116554	0.124646	0.101819	0.151726	0.109528	0.0871133	0.136846	0.139169	0.113511	0.169518
40	0.106241	0.0906037	0.124208	0.0929943	0.0775208	0.111184	0.119206	0.100573	0.140751	0.118022	0.0992562	0.139785	0.103609	0.0854573	0.125089	0.131885	0.109644	0.157837	0.0882183	0.0732407	0.105909	0.0773143	0.0632357	0.0942122	0.0992086	0.0812326	0.12064	0.134602	0.111157	0.162089	0.118423	0.0951971	0.146399	0.150066	0.123658	0.180948
41	0.112757	0.0970875	0.130589	0.098784	0.083041	0.11713	0.1264	0.107619	0.147916	0.124602	0.105358	0.146785	0.109526	0.0907595	0.131612	0.139167	0.116329	0.165647	0.0923521	0.077202	0.110121	0.0809694	0.0666039	0.0981077	0.103782	0.0855689	0.125341	0.145579	0.121256	0.173815	0.128259	0.103981	0.157211	0.162046	0.134601	0.193834
42	0.119794	0.103974	0.137651	0.105049	0.0889131	0.123715	0.134156	0.115103	0.155808	0.131692	0.111607	0.154763	0.115915	0.0962172	0.139025	0.146999	0.1232	0.174479	0.0968211	0.0812845	0.114956	0.0849257	0.0700802	0.102569	0.108721	0.0900562	0.130699	0.157474	0.131905	0.186933	0.138951	0.113302	0.169299	0.17499	0.146115	0.20818
43	0.127275	0.111112	0.145403	0.111723	0.0950226	0.130935	0.142386	0.122871	0.164419	0.139215	0.117868	0.163711	0.122708	0.101722	0.147313	0.155293	0.130115	0.184311	0.101583	0.0853983	0.120432	0.0891474	0.073595	0.107605	0.113979	0.0946005	0.136727	0.170137	0.142871	0.201385	0.150372	0.122973	0.182606	0.188724	0.157952	0.223896
44	0.1351	0.118345	0.153812	0.118721	0.101249	0.138742	0.150977	0.130759	0.173697	0.147073	0.124044	0.17353	0.129819	0.107192	0.156385	0.16394	0.136963	0.195029	0.106587	0.0894754	0.126516	0.0935896	0.077096	0.113179	0.119496	0.099127	0.143384	0.183364	0.153927	0.216987	0.162345	0.132801	0.19697	0.203021	0.169875	0.240759
45	0.143144	0.125528	0.162772	0.125932	0.107478	0.147033	0.159792	0.138616	0.183515	0.155147	0.130082	0.184021	0.137143	0.112574	0.16607	0.172806	0.143675	0.20642	0.111768	0.0934774	0.133113	0.0981972	0.0805523	0.119206	0.125203	0.103588	0.15057	0.196895	0.164869	0.233402	0.17464	0.1426	0.212099	0.217596	0.181664	0.25839
46	0.151257	0.132542	0.17209	0.133223	0.113607	0.155631	0.168666	0.146309	0.193664	0.163297	0.135954	0.194897	0.144551	0.117836	0.176114	0.181736	0.150209	0.21818	0.117052	0.0973926	0.140065	0.102904	0.0839525	0.125548	0.131016	0.107962	0.15812	0.210414	0.175515	0.250148	0.186974	0.152193	0.227569	0.23211	0.193126	0.276269
47	0.159264	0.139298	0.181488	0.140437	0.11955	0.164293	0.177406	0.153729	0.203852	0.171357	0.141649	0.205802	0.151896	0.122956	0.1862	0.190548	0.15654	0.229932	0.122351	0.101226	0.147162	0.107633	0.0872973	0.13202	0.136839	0.112245	0.165815	0.223561	0.185694	0.266623	0.199015	0.16141	0.242843	0.246178	0.204074	0.293761
48	0.166965	0.145719	0.190618	0.147394	0.125227	0.172711	0.185799	0.160783	0.213716	0.179146	0.147153	0.216331	0.159007	0.127913	0.195961	0.199044	0.162641	0.241248	0.127563	0.104991	0.154153	0.112293	0.0905927	0.138401	0.142563	0.116443	0.173391	0.235934	0.195232	0.282146	0.210391	0.170077	0.257298	0.259376	0.214323	0.310162
49	0.174142	0.151734	0.199083	0.153895	0.130559	0.180536	0.193608	0.16738	0.222847	0.186461	0.152441	0.226048	0.165697	0.132675	0.204996	0.207005	0.168481	0.251672	0.132577	0.108696	0.160759	0.116786	0.0938435	0.144444	0.148065	0.120561	0.180556	0.247103	0.203944	0.295998	0.2207	0.178008	0.270263	0.271261	0.223674	0.324738
50	0.180562	0.157264	0.206466	0.159726	0.13546	0.187395	0.200587	0.173426	0.230814	0.193088	0.157475	0.234512	0.171768	0.137203	0.212892	0.2142	0.174011	0.260743	0.13727	0.112345	0.166687	0.121002	0.0970487	0.149886	0.153213	0.124596	0.187	0.256627	0.211629	0.307461	0.229523	0.185005	0.281059	0.281376	0.231912	0.336764
51	0.186036	0.162247	0.212428	0.164711	0.139863	0.192983	0.206534	0.178844	0.237274	0.198853	0.162221	0.241373	0.177055	0.141459	0.219319	0.220446	0.179188	0.2681	0.141542	0.115942	0.171697	0.124849	0.100208	0.154509	0.157901	0.128549	0.192475	0.264161	0.218123	0.315987	0.236528	0.190905	0.289158	0.289369	0.238867	0.345699
52	0.190589	0.166721	0.216984	0.16887	0.143794	0.19731	0.211482	0.183676	0.242248	0.203786	0.166715	0.246661	0.181581	0.145473	0.224298	0.225776	0.184054	0.273783	0.145413	0.11952	0.175796	0.128345	0.10335	0.158317	0.16215	0.132455	0.196992	0.269753	0.223477	0.321641	0.241748	0.195743	0.294605	0.295304	0.244597	0.351631
53	0.194321	0.170745	0.220287	0.172288	0.147303	0.200514	0.215539	0.187985	0.245909	0.207987	0.171003	0.250553	0.185433	0.149285	0.227987	0.230302	0.188658	0.27799	0.148945	0.123114	0.179089	0.131542	0.106502	0.161405	0.166029	0.136349	0.200669	0.273591	0.227796	0.324721	0.245347	0.19961	0.297668	0.299386	0.249216	0.354882
54	0.197352	0.17437	0.222546	0.175071	0.150433	0.202782	0.218836	0.191826	0.24848	0.211571	0.175119	0.253281	0.188714	0.152926	0.230598	0.23415	0.193039	0.280967	0.152208	0.126746	0.18172	0.134503	0.109686	0.163901	0.169615	0.140256	0.203663	0.2759	0.231188	0.325597	0.247528	0.202597	0.298691	0.301855	0.252843	0.355843
55	0.199815	0.177637	0.224007	0.177339	0.153225	0.204333	0.221519	0.195248	0.250225	0.214668	0.179092	0.255114	0.191542	0.156421	0.232377	0.237459	0.197227	0.283005	0.155282	0.130434	0.183863	0.137298	0.112915	0.165961	0.172993	0.14419	0.206164	0.276928	0.233757	0.324693	0.248517	0.204799	0.298069	0.302974	0.255589	0.354954
56	0.201856	0.180584	0.224945	0.179222	0.155719	0.20541	0.223743	0.198294	0.251434	0.217415	0.182938	0.25635	0.194043	0.159789	0.233598	0.240381	0.201243	0.28442	0.158255	0.134185	0.185716	0.140004	0.116198	0.167762	0.17626	0.148161	0.208384	0.276939	0.235607	0.322463	0.248558	0.20631	0.296229	0.30302	0.257568	0.352683
57	0.203627	0.183241	0.225653	0.180857	0.157955	0.206267	0.225673	0.201008	0.252409	0.21996	0.186671	0.257307	0.19635	0.163045	0.234551	0.243073	0.205105	0.285544	0.16122	0.138003	0.187493	0.142706	0.119542	0.169494	0.179515	0.152169	0.210554	0.276207	0.236839	0.31938	0.247904	0.207225	0.293611	0.30228	0.258889	0.349515
58	0.205286	0.185644	0.226429	0.182388	0.159983	0.207157	0.227477	0.20344	0.25345	0.222455	0.190299	0.258311	0.198603	0.166205	0.235533	0.245698	0.208828	0.286719	0.164276	0.141884	0.189422	0.145491	0.122949	0.171357	0.182865	0.156217	0.212912	0.275006	0.237551	0.315919	0.24681	0.207645	0.290652	0.301042	0.25966	0.345937
59	0.206996	0.187842	0.227557	0.183961	0.161869	0.208318	0.22933	0.205666	0.254844	0.225058	0.193837	0.259688	0.200948	0.169292	0.236835	0.248427	0.212438	0.28828	0.16753	0.145827	0.191738	0.148455	0.126429	0.173556	0.186425	0.160312	0.215697	0.273611	0.237851	0.312544	0.245531	0.207682	0.287771	0.299594	0.260001	0.342426
60	0.208924	0.189922	0.229289	0.185728	0.163708	0.209966	0.23141	0.207794	0.256839	0.227932	0.19732	0.261746	0.203535	0.172349	0.238735	0.251433	0.215987	0.290539	0.171094	0.149845	0.194666	0.151699	0.13	0.176286	0.190313	0.164481	0.219138	0.272296	0.237865	0.309687	0.244319	0.207473	0.285353	0.298221	0.260051	0.339424
61	0.211241	0.192024	0.231829	0.187845	0.165627	0.212285	0.233898	0.209985	0.25964	0.231248	0.200822	0.264757	0.20652	0.175451	0.241479	0.254895	0.219566	0.29377	0.175089	0.153979	0.198414	0.155332	0.133707	0.179729	0.194659	0.168782	0.223436	0.271329	0.237758	0.307726	0.243424	0.207185	0.283734	0.297206	0.259987	0.337325
62	0.214124	0.194349	0.235324	0.190475	0.167796	0.215426	0.236985	0.212451	0.263404	0.235181	0.204473	0.268943	0.210068	0.178718	0.245274	0.259003	0.223321	0.298197	0.179643	0.158314	0.203153	0.159472	0.137629	0.184041	0.199599	0.173322	0.228757	0.270976	0.237752	0.306974	0.243093	0.207032	0.283192	0.296831	0.260045	0.336453
63	0.217762	0.197153	0.239882	0.19379	0.170421	0.219515	0.240868	0.215451	0.268257	0.23992	0.208468	0.274472	0.214352	0.182322	0.250286	0.263951	0.227463	0.30399	0.1849	0.162997	0.209011	0.164248	0.141891	0.18935	0.205283	0.17826	0.23523	0.271508	0.238131	0.307673	0.243573	0.20727	0.283958	0.297375	0.260521	0.337067
64	0.222354	0.200727	0.245594	0.197972	0.173738	0.224668	0.245756	0.21928	0.274306	0.245665	0.213068	0.281465	0.219559	0.186485	0.256649	0.26995	0.23226	0.311277	0.191014	0.16823	0.216082	0.169803	0.146661	0.195758	0.211874	0.183808	0.242949	0.273197	0.239238	0.310011	0.24512	0.208201	0.286218	0.299128	0.26177	0.339368
65	0.228082	0.205352	0.252529	0.203193	0.177978	0.230975	0.251841	0.224217	0.281633	0.252599	0.218543	0.289992	0.225864	0.191443	0.26445	0.277188	0.237989	0.32013	0.198135	0.174238	0.22442	0.176275	0.15213	0.203335	0.219526	0.190193	0.251976	0.276277	0.241409	0.314097	0.247951	0.210112	0.290101	0.302333	0.26414	0.343471
66	0.235009	0.211158	0.260664	0.209512	0.183254	0.238435	0.259182	0.230389	0.290216	0.260784	0.225039	0.30001	0.233329	0.197322	0.273666	0.285723	0.244793	0.330501	0.206335	0.181162	0.234006	0.183735	0.158418	0.21208	0.228309	0.197551	0.262291	0.280792	0.24478	0.319858	0.252107	0.213114	0.295555	0.307029	0.267769	0.3493
67	0.243171	0.218227	0.269982	0.21697	0.189638	0.247039	0.267808	0.237871	0.30003	0.270258	0.232652	0.311474	0.241994	0.204211	0.284271	0.295583	0.252763	0.342335	0.215668	0.189112	0.244827	0.192238	0.165622	0.221992	0.238272	0.205985	0.273874	0.286742	0.249426	0.327208	0.257596	0.217267	0.302519	0.313213	0.27273	0.356758
68	0.25261	0.226631	0.280486	0.22561	0.197203	0.256801	0.277755	0.246731	0.31107	0.281057	0.241469	0.324361	0.251904	0.21219	0.296255	0.306799	0.261977	0.355595	0.226192	0.198185	0.256888	0.201843	0.173836	0.233089	0.249467	0.215588	0.286724	0.294139	0.255405	0.336095	0.264434	0.222623	0.310956	0.320889	0.279081	0.365782
69	0.263372	0.236438	0.2922	0.235486	0.206016	0.26775	0.289062	0.25703	0.323348	0.293224	0.251562	0.338663	0.263105	0.221333	0.309627	0.3194	0.272502	0.370261	0.237967	0.208471	0.270212	0.212616	0.183146	0.245403	0.261948	0.226444	0.300853	0.303	0.26277	0.346494	0.272644	0.229233	0.320854	0.330065	0.286869	0.376334
70	0.275505	0.247705	0.30516	0.246652	0.216143	0.279929	0.301765	0.268819	0.336888	0.306795	0.262993	0.354385	0.275648	0.231706	0.324405	0.333412	0.284393	0.386318	0.251057	0.220052	0.284835	0.224623	0.193634	0.258979	0.275765	0.238628	0.316281	0.313348	0.271565	0.358397	0.282258	0.237143	0.332218	0.340756	0.296134	0.388391
71	0.289058	0.260481	0.319416	0.259164	0.227642	0.293394	0.315901	0.282138	0.351725	0.321805	0.275812	0.371533	0.289578	0.243369	0.340611	0.348855	0.297692	0.403757	0.26552	0.232998	0.300801	0.237932	0.205375	0.273871	0.290967	0.252202	0.333037	0.325208	0.281824	0.371813	0.29331	0.246396	0.345067	0.352972	0.306901	0.401947
72	0.304074	0.2748	0.335026	0.273079	0.240561	0.308209	0.331499	0.297009	0.367897	0.338281	0.290057	0.390117	0.304937	0.256371	0.358271	0.36574	0.312423	0.422565	0.28141	0.247363	0.318162	0.252608	0.218435	0.290142	0.307594	0.267214	0.351151	0.338602	0.293573	0.386755	0.305836	0.257031	0.359424	0.366723	0.319189	0.417001
73	0.320589	0.290669	0.35206	0.288447	0.254933	0.324448	0.348577	0.31343	0.385453	0.356236	0.305746	0.410138	0.32176	0.270749	0.377407	0.384063	0.328594	0.442721	0.298774	0.263187	0.336972	0.26871	0.232866	0.307857	0.325674	0.283692	0.370653	0.353548	0.306827	0.403245	0.319869	0.26908	0.375321	0.382012	0.332996	0.433553
74	0.338628	0.308068	0.370596	0.305311	0.270769	0.342192	0.367144	0.33137	0.404443	0.375669	0.32288	0.431588	0.340066	0.286525	0.398031	0.403804	0.346193	0.464196	0.317644	0.280482	0.357284	0.286289	0.2487	0.327087	0.345221	0.301639	0.391568	0.370055	0.321583	0.421296	0.335435	0.282562	0.392786	0.39883	0.348307	0.451603
75	0.3582	0.326938	0.390717	0.323704	0.288055	0.361525	0.387185	0.350761	0.424916	0.396558	0.341434	0.454439	0.359862	0.303702	0.420142	0.424921	0.36518	0.486939	0.338035	0.299235	0.379145	0.305384	0.265949	0.347895	0.366229	0.32103	0.413911	0.388119	0.337822	0.440919	0.352554	0.297487	0.411839	0.417153	0.365082	0.471139
76	0.379294	0.34718	0.412501	0.34364	0.306741	0.382528	0.408668	0.371495	0.446916	0.418856	0.361361	0.478644	0.381132	0.322261	0.443716	0.447349	0.385492	0.51088	0.359943	0.319398	0.402591	0.326013	0.284596	0.370338	0.388668	0.341807	0.437683	0.407717	0.355499	0.462105	0.371227	0.313844	0.432489	0.436938	0.383261	0.492134
77	0.401872	0.368656	0.436014	0.365113	0.326749	0.405269	0.431533	0.393427	0.470468	0.442491	0.382582	0.504122	0.403834	0.342159	0.468704	0.470993	0.407034	0.53592	0.383333	0.34089	0.427633	0.348175	0.304596	0.394453	0.412483	0.363875	0.46286	0.428803	0.374551	0.484823	0.391438	0.331605	0.454723	0.45812	0.402754	0.514541
78	0.425869	0.391196	0.461285	0.388091	0.347968	0.429791	0.455691	0.416379	0.495563	0.467358	0.404995	0.530759	0.427899	0.36333	0.495021	0.495733	0.429687	0.561928	0.408143	0.363599	0.45425	0.371841	0.325875	0.420249	0.437586	0.387111	0.489387	0.451308	0.394885	0.509011	0.413148	0.35072	0.4785	0.480608	0.423451	0.538278
79	0.451185	0.414618	0.488286	0.412511	0.370262	0.456088	0.481021	0.440154	0.522143	0.493321	0.428467	0.5584	0.453226	0.385679	0.52254	0.521415	0.453305	0.588738	0.434275	0.387384	0.482373	0.396949	0.348332	0.447691	0.463855	0.411357	0.517166	0.475129	0.416389	0.534566	0.43629	0.371115	0.503743	0.504282	0.445216	0.563229
80	0.477687	0.43874	0.516907	0.438276	0.393487	0.484094	0.50737	0.464552	0.550079	0.520209	0.452846	0.586846	0.479679	0.409088	0.551092	0.547861	0.477722	0.616149	0.461596	0.412085	0.511875	0.423404	0.371842	0.47669	0.491137	0.436439	0.546048	0.500134	0.438928	0.561337	0.460765	0.392695	0.53033	0.528991	0.467896	0.58923
81	0.505205	0.463394	0.546943	0.465254	0.41749	0.513663	0.534553	0.489384	0.579163	0.547825	0.477959	0.615855	0.507091	0.433418	0.580457	0.574864	0.502754	0.643923	0.489933	0.43753	0.542559	0.451072	0.396264	0.507093	0.519245	0.462165	0.575827	0.526158	0.462352	0.589121	0.48644	0.415343	0.55809	0.554558	0.491324	0.616074
82	0.533535	0.488432	0.578097	0.493274	0.442125	0.544564	0.562358	0.514475	0.609106	0.575942	0.503623	0.645148	0.535259	0.458512	0.610372	0.602198	0.528207	0.671794	0.519083	0.463541	0.574157	0.479782	0.421448	0.538672	0.547963	0.488341	0.606239	0.553002	0.486498	0.617662	0.513148	0.438924	0.586797	0.580777	0.515324	0.643506
83	0.562444	0.513717	0.609995	0.522131	0.46725	0.576483	0.590546	0.539672	0.639553	0.604312	0.529643	0.674415	0.563955	0.484197	0.640536	0.629621	0.553886	0.699474	0.548807	0.489941	0.606337	0.509326	0.447235	0.57113	0.577048	0.514772	0.636968	0.580441	0.511194	0.646659	0.54069	0.463289	0.616176	0.60742	0.539718	0.67123
84	0.591672	0.539123	0.642206	0.551587	0.492726	0.609036	0.618863	0.564835	0.670102	0.632676	0.555824	0.703328	0.592928	0.510295	0.670617	0.656884	0.579592	0.726668	0.578843	0.516556	0.638717	0.539464	0.473466	0.604107	0.606243	0.541273	0.66766	0.608227	0.536265	0.675774	0.568836	0.488276	0.64591	0.634243	0.564327	0.698925
85	0.620944	0.564523	0.674273	0.581378	0.51842	0.641793	0.647045	0.589832	0.700332	0.660768	0.581975	0.731559	0.62191	0.536619	0.700272	0.683742	0.605138	0.753084	0.608912	0.543218	0.670883	0.569931	0.499978	0.637199	0.635279	0.567668	0.697942	0.636095	0.561533	0.704646	0.597331	0.513713	0.675648	0.660991	0.588976	0.726253
86	0.649979	0.589789	0.705743	0.611225	0.544194	0.674298	0.674828	0.61454	0.729833	0.688328	0.607909	0.758798	0.650632	0.562983	0.729159	0.709958	0.630345	0.77845	0.638729	0.569761	0.702416	0.600444	0.526612	0.669977	0.663889	0.59379	0.727444	0.663773	0.586823	0.732915	0.625905	0.539426	0.705026	0.687412	0.613499	0.752884
87	0.678498	0.614793	0.736188	0.640839	0.56991	0.706102	0.70196	0.638838	0.758225	0.715113	0.633451	0.784763	0.678826	0.589204	0.756961	0.735312	0.655049	0.802529	0.668012	0.596029	0.732916	0.630712	0.553207	0.702014	0.691818	0.619488	0.755818	0.690995	0.611963	0.760237	0.654281	0.565236	0.733681	0.71326	0.637734	0.778508
88	0.706238	0.639405	0.765233	0.669936	0.595429	0.736787	0.728206	0.662611	0.785182	0.740899	0.658439	0.80922	0.706241	0.615109	0.783394	0.759612	0.679102	0.825125	0.696493	0.62187	0.762025	0.660448	0.579605	0.732909	0.718827	0.644619	0.782762	0.717505	0.636788	0.786304	0.682183	0.590967	0.761275	0.738306	0.661533	0.802855
89	0.73296	0.663495	0.792568	0.698247	0.620611	0.765985	0.753358	0.685748	0.810444	0.765497	0.682727	0.831988	0.732648	0.64053	0.808227	0.782698	0.702374	0.846094	0.723931	0.647144	0.789445	0.689381	0.605655	0.762308	0.744709	0.669058	0.808029	0.743071	0.661142	0.810859	0.709352	0.616446	0.787511	0.762349	0.684757	0.825704
90	0.758456	0.686942	0.817963	0.725526	0.64532	0.793401	0.777245	0.708146	0.833823	0.788751	0.706186	0.852945	0.75785	0.665318	0.831287	0.804442	0.724756	0.865344	0.750116	0.671719	0.814949	0.717265	0.631209	0.789923	0.769288	0.69269	0.831439	0.767492	0.68488	0.833705	0.73555	0.64151	0.812146	0.785216	0.707283	0.846892
91	0.782559	0.709633	0.841267	0.751562	0.669426	0.818813	0.799729	0.729714	0.855206	0.810544	0.728708	0.872029	0.781688	0.689337	0.852461	0.824753	0.746157	0.882835	0.774878	0.695477	0.838387	0.743886	0.656132	0.815541	0.792428	0.71542	0.852883	0.790601	0.707872	0.85471	0.760571	0.666003	0.834996	0.806772	0.729001	0.866317
92	0.805142	0.731467	0.862405	0.776182	0.692807	0.842086	0.820715	0.750373	0.874549	0.8308	0.750203	0.889232	0.804039	0.712469	0.871698	0.843578	0.766508	0.898575	0.798089	0.718318	0.859682	0.76907	0.6803	0.839024	0.814032	0.737165	0.872313	0.812273	0.730005	0.873807	0.784245	0.689786	0.855949	0.826918	0.74982	0.883935
93	0.82612	0.752359	0.881375	0.799257	0.715357	0.863158	0.840144	0.770057	0.891868	0.84948	0.770605	0.904592	0.824825	0.734617	0.889003	0.860895	0.785757	0.912612	0.819663	0.740155	0.878826	0.792687	0.703602	0.860312	0.834043	0.757862	0.889743	0.832422	0.751182	0.890986	0.806446	0.712736	0.87495	0.845592	0.769663	0.899752
94	0.845451	0.772238	0.898232	0.8207	0.736981	0.882037	0.857996	0.788716	0.907231	0.866579	0.789864	0.918188	0.844003	0.755702	0.904424	0.876715	0.803873	0.925026	0.839557	0.760921	0.895868	0.814649	0.725945	0.879411	0.85244	0.777463	0.905234	0.851003	0.771326	0.906292	0.827087	0.734746	0.892007	0.862769	0.788473	0.913822
95	0.86313	0.791053	0.913076	0.840468	0.757602	0.89879	0.874282	0.806316	0.920742	0.882124	0.807953	0.930126	0.861569	0.775667	0.918052	0.891072	0.820842	0.935922	0.857765	0.780566	0.910905	0.834912	0.747253	0.896384	0.869234	0.795938	0.918887	0.868008	0.79038	0.919805	0.846123	0.75573	0.907175	0.878454	0.806212	0.926229
96	0.879184	0.808768	0.926042	0.858555	0.777163	0.913526	0.889041	0.822838	0.932533	0.896165	0.82486	0.940532	0.877548	0.794474	0.930001	0.904025	0.836664	0.945418	0.874316	0.799058	0.924066	0.853469	0.767468	0.911338	0.884467	0.813271	0.930827	0.883458	0.808307	0.931638	0.863545	0.775622	0.920545	0.89268	0.822855	0.937087
97	0.893667	0.825365	0.937285	0.874988	0.79562	0.926386	0.902335	0.838278	0.942752	0.908774	0.84059	0.949544	0.891991	0.812103	0.940405	0.915645	0.851355	0.953643	0.889263	0.816383	0.935501	0.870348	0.78655	0.924409	0.898201	0.829463	0.941198	0.897403	0.825086	0.941925	0.879379	0.794378	0.932239	0.905503	0.838396	0.946521
98	0.906656	0.840843	0.946971	0.889822	0.812952	0.937529	0.914242	0.852642	0.951554	0.920036	0.855164	0.957303	0.90497	0.828552	0.949407	0.926018	0.864942	0.960728	0.902682	0.832541	0.945372	0.885603	0.804478	0.935756	0.910516	0.844526	0.95015	0.909913	0.840715	0.950809	0.893674	0.811971	0.942395	0.916995	0.852843	0.954667
99	0.918242	0.855212	0.955268	0.903135	0.829149	0.947125	0.924854	0.865953	0.959096	0.930047	0.868611	0.963948	0.916572	0.843834	0.957151	0.935234	0.877462	0.9668	0.914667	0.847548	0.953845	0.89931	0.821244	0.945544	0.921503	0.858485	0.957837	0.921075	0.855206	0.958436	0.906505	0.828391	0.951159	0.92724	0.866216	0.961661
100	0.928525	0.868498	0.96234	0.915019	0.84422	0.955344	0.934267	0.878241	0.965526	0.938906	0.880974	0.969614	0.926895	0.857973	0.963782	0.94339	0.888958	0.971981	0.925319	0.861431	0.961082	0.911564	0.836858	0.953943	0.931262	0.871375	0.964405	0.930984	0.868584	0.96495	0.917959	0.843647	0.958681	0.936332	0.878546	0.967637

## Sheet: SC
	BELGIUM									BRUSSELS									FLANDERS									WALLONIA
	Both			Male			Female			Both			Male			Female			Both			Male			Female			Both			Male			Female
Age	mean	lwr	upr	mean	lwr	upr	mean	lwr	upr	mean	lwr	upr	mean	lwr	upr	mean	lwr	upr	mean	lwr	upr	mean	lwr	upr	mean	lwr	upr	mean	lwr	upr	mean	lwr	upr	mean	lwr	upr
ALL	0.0588501	0.0518289	0.0667554	0.0513771	0.0418254	0.0629667	0.0658603	0.0563466	0.0768494	0.0542259	0.0436914	0.067122	0.0473204	0.0366275	0.0609376	0.0606553	0.0474716	0.0772035	0.055883	0.0465052	0.0670188	0.0488496	0.0383453	0.0620457	0.0625871	0.0508656	0.076791	0.0655084	0.0533776	0.0801626	0.0571956	0.0436771	0.0745719	0.0730997	0.0588559	0.0904594
15	0.0316445	0.0125805	0.0773347	0.0297301	0.0115008	0.0746712	0.0334775	0.0133712	0.0813253	0.0320499	0.0129366	0.0771935	0.030085	0.0118614	0.074204	0.0337988	0.0136416	0.0812862	0.0281395	0.0107745	0.071469	0.026486	0.00989827	0.0689362	0.0297692	0.0114288	0.0752998	0.0364695	0.0144122	0.0892287	0.0342768	0.0131491	0.0863804	0.0384876	0.0152928	0.0935211
16	0.0298819	0.0125842	0.0692877	0.0280767	0.011491	0.0669795	0.0316224	0.0133759	0.0729197	0.03036	0.0130332	0.0691086	0.0285087	0.0119483	0.0664775	0.0320344	0.013738	0.072897	0.0261778	0.0105744	0.0633316	0.0246408	0.00970856	0.0611222	0.0277018	0.0112135	0.0667968	0.035115	0.0147016	0.0815271	0.0330084	0.0133912	0.0790609	0.0370694	0.0156093	0.0854719
17	0.0282273	0.0125644	0.0621861	0.0265246	0.0114586	0.0601934	0.0298803	0.0133555	0.0654943	0.0287691	0.0131031	0.0619889	0.0270244	0.0120104	0.0596734	0.0303722	0.0138045	0.0655032	0.0243626	0.0103516	0.0562598	0.0229336	0.00949829	0.0543308	0.0257881	0.0109738	0.0594001	0.0338205	0.0149552	0.0746792	0.0317962	0.0135981	0.0725574	0.0357136	0.0158888	0.078306
18	0.026686	0.0125196	0.0559733	0.0250787	0.0114027	0.0542571	0.0282569	0.0133082	0.0589928	0.0272831	0.0131425	0.055778	0.0256375	0.0120445	0.0537367	0.0288187	0.0138372	0.0590494	0.0226951	0.010107	0.0501666	0.0213652	0.00926857	0.0484771	0.0240294	0.0107107	0.0530218	0.0325942	0.0151652	0.0686573	0.0306479	0.0137634	0.0668418	0.0344288	0.0161231	0.0719972
19	0.0252609	0.0124485	0.0505848	0.023742	0.0113224	0.049108	0.0267554	0.0132326	0.0533501	0.0259056	0.0131472	0.0504125	0.0243518	0.0120472	0.0486055	0.0273779	0.0138314	0.0534725	0.0211736	0.00984204	0.0449595	0.0199344	0.00902093	0.0434717	0.0224242	0.0104257	0.0475675	0.0314429	0.0153241	0.0634247	0.0295698	0.0138811	0.0618774	0.0332222	0.0163039	0.0665095
20	0.0239536	0.0123499	0.0459526	0.0225156	0.0112171	0.0446803	0.0253773	0.0131273	0.048497	0.024639	0.013113	0.0458257	0.0231692	0.012015	0.0442153	0.0260523	0.0137827	0.0487051	0.0197952	0.00955872	0.0405453	0.018638	0.0087576	0.0392246	0.0209694	0.010121	0.0429415	0.0303724	0.0154249	0.058938	0.0285672	0.0139462	0.0576209	0.0320999	0.0164235	0.0617996
21	0.022764	0.0122232	0.0420082	0.0213996	0.0110871	0.0409075	0.024123	0.0129916	0.0443633	0.0234842	0.013036	0.0419506	0.0220908	0.011945	0.0405012	0.0248431	0.0136874	0.0446793	0.0185554	0.0092602	0.0368339	0.017472	0.00848172	0.0356489	0.0196604	0.00980003	0.0390506	0.0293873	0.0154626	0.0551495	0.0276446	0.0139557	0.054025	0.0310668	0.016476	0.0578195
22	0.0216912	0.012069	0.0386846	0.0203932	0.0109337	0.0377248	0.0229916	0.0128261	0.0408802	0.0224412	0.0129138	0.0387218	0.0211167	0.0118358	0.0373997	0.0237506	0.0135436	0.0413275	0.0174488	0.00895099	0.0337396	0.0164313	0.00819761	0.0326625	0.0184918	0.00946774	0.0358061	0.0284914	0.0154353	0.0520078	0.0268055	0.0139096	0.0510388	0.0301271	0.0164588	0.0545173
23	0.020734	0.0118899	0.0359175	0.0194952	0.0107601	0.03507	0.0219817	0.0126334	0.0379812	0.0215094	0.0127467	0.0360757	0.0202463	0.0116882	0.0348498	0.0227742	0.0133524	0.0385841	0.01647	0.00863706	0.0311832	0.0155107	0.0079108	0.0301897	0.0174578	0.00913062	0.0331256	0.0276881	0.0153458	0.0494587	0.0260532	0.0138118	0.0486093	0.0292844	0.0163741	0.0518376
24	0.0198905	0.0116907	0.0336458	0.0187038	0.0105714	0.0328843	0.0210915	0.0124187	0.0356028	0.020688	0.012539	0.0339509	0.019479	0.0115064	0.0327925	0.0219132	0.0131192	0.0363847	0.0156134	0.00832586	0.0290926	0.014705	0.00762799	0.0281616	0.0165527	0.00879665	0.0309339	0.0269805	0.015202	0.0474453	0.0253905	0.0136708	0.0466819	0.0285419	0.0162298	0.0497221
25	0.0191591	0.0114791	0.0318119	0.0180176	0.0103751	0.0311127	0.0203195	0.0121903	0.0336849	0.0199762	0.0122996	0.0322875	0.018814	0.0112985	0.0311711	0.0211669	0.0128542	0.0346667	0.0148738	0.00802597	0.0274027	0.0140093	0.00735681	0.0265167	0.015771	0.008475	0.0291631	0.0263715	0.0150175	0.0459094	0.0248202	0.0134989	0.0452014	0.0279028	0.01604	0.0481103
26	0.0185385	0.0112659	0.0303618	0.0174353	0.0101806	0.0297043	0.0196643	0.0119595	0.0321712	0.0193734	0.0120422	0.0310276	0.0182509	0.0110765	0.0299316	0.0205348	0.0125725	0.0333695	0.0142464	0.00774662	0.0260567	0.0134192	0.00710534	0.0252011	0.0151078	0.00817545	0.0277538	0.0258641	0.0148105	0.0447925	0.0243452	0.013312	0.0441139	0.0273705	0.0158237	0.0469414
27	0.018028	0.0110638	0.0292462	0.0169562	0.00999943	0.028613	0.0191252	0.0117401	0.03101	0.0188795	0.0117843	0.0301165	0.0177897	0.0108554	0.0290234	0.020017	0.0122924	0.0324364	0.0137277	0.00749718	0.0250056	0.0129312	0.00688179	0.0241688	0.0145592	0.00790786	0.0266549	0.0254619	0.0146018	0.0440383	0.0239687	0.0131281	0.0433677	0.0269486	0.0156034	0.046156
28	0.0176276	0.0108876	0.0284204	0.0165805	0.00984392	0.0277977	0.0187023	0.0115477	0.0301545	0.0184954	0.0115452	0.0295047	0.0174311	0.010652	0.0284008	0.0196145	0.0120341	0.031816	0.0133149	0.00728676	0.0242082	0.0125427	0.00669415	0.0233809	0.0141226	0.00768173	0.0258234	0.0251689	0.0144138	0.0435943	0.0236947	0.0129658	0.0429156	0.0266414	0.015403	0.045699
29	0.0173387	0.0107524	0.0278459	0.0163093	0.00972708	0.0272231	0.0183971	0.0113984	0.0295645	0.0182229	0.0113445	0.0291488	0.0171771	0.0104833	0.0280239	0.0193293	0.0118174	0.0314641	0.0130067	0.007124	0.0236313	0.0122527	0.00655007	0.0228061	0.0137965	0.00750605	0.0252249	0.0249902	0.0142684	0.043414	0.0235278	0.0128435	0.0427157	0.0264543	0.0152462	0.0455211
30	0.0171639	0.0106738	0.0274905	0.0161452	0.00966212	0.0268602	0.0182123	0.0113086	0.0292062	0.0180653	0.0112008	0.0290134	0.0170307	0.0103658	0.0278602	0.0191649	0.0116609	0.0313446	0.0128034	0.00701729	0.0232488	0.0120613	0.00645703	0.0224201	0.0135814	0.00738944	0.0248322	0.0249319	0.0141865	0.0434574	0.0234739	0.012779	0.0427322	0.0263939	0.0151556	0.0455799
31	0.0171076	0.0106675	0.0273284	0.0160923	0.00966243	0.0266857	0.0181528	0.0112947	0.029053	0.0180278	0.0111314	0.0290709	0.0169967	0.0103152	0.0278839	0.0191267	0.011582	0.0314299	0.0127074	0.00697507	0.0230414	0.0119708	0.00642269	0.0222045	0.0134797	0.0073406	0.0246255	0.0250018	0.0141882	0.0436916	0.0235402	0.0127893	0.0429356	0.0264682	0.0151526	0.0458406
32	0.0171767	0.0107495	0.0273407	0.0161571	0.00974193	0.0266828	0.0182257	0.0113733	0.0290851	0.0181174	0.0111529	0.0293019	0.0170819	0.0103467	0.0280769	0.0192224	0.0115971	0.0317006	0.0127233	0.0070066	0.0229961	0.0119855	0.00645545	0.0221473	0.0134962	0.00736898	0.0245917	0.0252095	0.014293	0.0440905	0.0237358	0.0128914	0.0433026	0.0266875	0.0152582	0.0462757
33	0.0173806	0.0109372	0.0275143	0.0163482	0.00991579	0.0268403	0.0184409	0.0115625	0.0292898	0.0183442	0.0112821	0.0296942	0.0172957	0.0104758	0.0284278	0.0194625	0.011723	0.0321452	0.0128585	0.0071227	0.0231056	0.0121124	0.00656521	0.0222416	0.0136388	0.00748567	0.0247237	0.0255671	0.0145213	0.0446346	0.0240721	0.013103	0.0438163	0.0270644	0.0154937	0.0468648
34	0.017732	0.0112504	0.0278425	0.0166778	0.0102013	0.0271532	0.0188119	0.0118825	0.0296608	0.0187214	0.011537	0.0302429	0.0176505	0.0107194	0.028932	0.0198608	0.0119778	0.0327597	0.0131239	0.00733687	0.0233681	0.0123617	0.00676429	0.0224862	0.0139191	0.00770441	0.0250205	0.0260898	0.0148951	0.0453109	0.0245632	0.0134436	0.0444654	0.0276148	0.0158824	0.0475947
35	0.0182479	0.0117128	0.0283248	0.0171618	0.0106193	0.0276224	0.0193566	0.0123575	0.0301986	0.0192665	0.0119391	0.0309503	0.0181626	0.0110971	0.0295919	0.0204357	0.0123826	0.0335482	0.013535	0.00766654	0.0237878	0.0127479	0.00706851	0.0228855	0.0143533	0.00804297	0.0254873	0.0267962	0.0154402	0.0461131	0.0252266	0.0139358	0.0452456	0.0283583	0.0164511	0.0484593
36	0.0189507	0.0123536	0.0289675	0.017821	0.0111952	0.0282561	0.0200984	0.0130168	0.0309118	0.0200022	0.0125139	0.0318269	0.0188532	0.0116326	0.030418	0.0212109	0.0129628	0.0345236	0.0141125	0.00813462	0.0243753	0.0132906	0.00749864	0.0234505	0.0149632	0.00852461	0.0261368	0.0277097	0.0161871	0.0470422	0.0260844	0.0146064	0.0461597	0.0293194	0.0172313	0.0494606
37	0.0198633	0.0132031	0.0297816	0.018677	0.0119552	0.0290669	0.0210614	0.0138909	0.0318137	0.0209515	0.0132872	0.0328892	0.019744	0.0123491	0.0314263	0.0222106	0.0137435	0.0357051	0.014879	0.00876671	0.0251446	0.0140108	0.00807769	0.0241956	0.0157727	0.00917511	0.0269852	0.0288527	0.017166	0.0481065	0.0271574	0.0154814	0.0472173	0.0305213	0.0182537	0.0506085
38	0.0209902	0.0142725	0.0307711	0.019734	0.0129079	0.03006	0.0222503	0.0149893	0.032911	0.0221187	0.0142646	0.0341476	0.020839	0.0132516	0.032627	0.023439	0.0147295	0.0371047	0.015842	0.00957606	0.0260998	0.0149158	0.0088173	0.0251254	0.0167895	0.0100072	0.0280382	0.0302255	0.0183831	0.0493137	0.0284461	0.016566	0.0484263	0.0319643	0.0195235	0.0519128
39	0.0223315	0.015565	0.0319442	0.0209922	0.0140553	0.0312442	0.023665	0.0163134	0.0342143	0.0235035	0.0154441	0.0356165	0.0221375	0.0143379	0.0340336	0.0248955	0.0159176	0.0387379	0.0170058	0.0105723	0.0272465	0.0160095	0.00972565	0.0262459	0.0180181	0.0110297	0.0293032	0.0318222	0.0198355	0.0506781	0.0299448	0.0178571	0.0497999	0.033642	0.0210362	0.0533898
40	0.0238865	0.0170779	0.0333176	0.0224508	0.0153938	0.0326357	0.0253045	0.0178579	0.0357432	0.0251042	0.0168183	0.0373175	0.0236383	0.0156008	0.0356668	0.0265782	0.0172998	0.0406272	0.018375	0.0117628	0.0285965	0.0172962	0.0108087	0.0275692	0.019463	0.0122488	0.0307939	0.0336353	0.0215139	0.0522216	0.0316466	0.0193462	0.0513581	0.0355462	0.0227796	0.0550644
41	0.0256517	0.0187974	0.0349166	0.0241067	0.0169109	0.0342576	0.027165	0.0196064	0.0375261	0.0269168	0.0183712	0.0392787	0.0253375	0.0170253	0.0375529	0.0284825	0.01886	0.0428004	0.0199518	0.0131488	0.030167	0.0187781	0.0120668	0.0291121	0.0211266	0.0136645	0.0325294	0.0356537	0.0233982	0.0539736	0.0335413	0.0210159	0.0531267	0.0376653	0.024731	0.056969
42	0.027619	0.0206934	0.0367755	0.0259524	0.0185818	0.0361389	0.0292379	0.0215272	0.0395987	0.0289324	0.0200753	0.0415316	0.0272267	0.0185864	0.039721	0.0305988	0.0205718	0.0452873	0.0217346	0.0147214	0.0319804	0.0204538	0.0134917	0.0308961	0.0230069	0.0152669	0.0345335	0.0378618	0.0254548	0.055969	0.0356144	0.022838	0.0551349	0.0399827	0.0268534	0.0591411
43	0.0297736	0.0227174	0.0389341	0.0279741	0.0203678	0.0383097	0.0315072	0.0235717	0.0419993	0.0311353	0.0218916	0.0441061	0.0292913	0.0202489	0.0421977	0.0329105	0.0223982	0.0481137	0.0237152	0.016458	0.0340616	0.0223157	0.0150631	0.0329435	0.0250953	0.0170328	0.0368312	0.0402374	0.0276348	0.0582432	0.037845	0.0247722	0.0574105	0.0424748	0.0290947	0.0616179
44	0.0320914	0.0248048	0.0414277	0.0301495	0.0222189	0.0407927	0.0339479	0.0256785	0.0447579	0.0335008	0.0237715	0.0470204	0.0315084	0.0219695	0.0449984	0.0353915	0.0242941	0.0512918	0.0258763	0.0183205	0.0364329	0.0243477	0.0167478	0.0352727	0.0273733	0.0189247	0.039442	0.0427502	0.029876	0.0608242	0.040205	0.0267678	0.059972	0.04511	0.0313908	0.0644264
45	0.0345378	0.0268849	0.0442701	0.0324463	0.0240799	0.0435898	0.0365231	0.0277821	0.0478788	0.0359937	0.0256631	0.0502682	0.033845	0.0237019	0.0481149	0.0380048	0.0262104	0.0548079	0.0281891	0.0202574	0.0391027	0.0265229	0.0185014	0.0378879	0.0298105	0.020893	0.0423695	0.0453604	0.0321099	0.0637189	0.0426574	0.0287685	0.062818	0.0478467	0.0336727	0.0675699
46	0.0370651	0.0288953	0.0474321	0.03482	0.0258991	0.0466663	0.0391829	0.0298247	0.0513222	0.0385659	0.0275176	0.0538048	0.0362565	0.0254023	0.0515036	0.0407003	0.0280999	0.05861	0.0306105	0.02221	0.0420516	0.0288009	0.0202732	0.0407663	0.0323615	0.0228814	0.0455862	0.048018	0.0342711	0.0668972	0.0451554	0.0307192	0.0659144	0.0506325	0.0358763	0.071011
47	0.0396117	0.0307917	0.0508257	0.0372129	0.0276351	0.0499398	0.0418627	0.0317636	0.0549905	0.041156	0.029294	0.0575364	0.0386855	0.0270332	0.055076	0.0434135	0.0299211	0.0625975	0.0330812	0.0241208	0.045216	0.0311264	0.0220124	0.0438448	0.0349642	0.0248338	0.0490193	0.050662	0.0363072	0.0702785	0.0476419	0.032573	0.0691836	0.0534038	0.0379517	0.0746591
48	0.0421017	0.0325493	0.0543001	0.0395543	0.029258	0.053275	0.0444831	0.0335719	0.0587251	0.0436883	0.0309609	0.0613166	0.0410616	0.0285649	0.058695	0.0460661	0.0316397	0.0666178	0.0355254	0.0259396	0.0484773	0.0334282	0.0236727	0.0470104	0.0375388	0.0267	0.0525402	0.0532205	0.0381838	0.0737248	0.0500499	0.0342947	0.0724995	0.0560858	0.0398668	0.0783645
49	0.0444458	0.0341556	0.0576511	0.0417603	0.0307468	0.0564888	0.0469506	0.0352325	0.0623143	0.0460743	0.0324935	0.0649503	0.0433019	0.0299731	0.062178	0.0485657	0.0332267	0.0704697	0.0378506	0.027625	0.0516601	0.0356196	0.0252141	0.0500987	0.0399885	0.0284362	0.0559637	0.0556118	0.0398833	0.0770453	0.0523025	0.0358614	0.0756896	0.0585933	0.0416057	0.0819241
50	0.0465435	0.0356017	0.0606367	0.0437367	0.0320836	0.0593628	0.0491601	0.0367315	0.0655081	0.0482145	0.0338699	0.0682055	0.0453137	0.031236	0.0653081	0.050809	0.0346559	0.0739145	0.0399502	0.0291418	0.0545421	0.0376004	0.0266003	0.0529022	0.0422017	0.0300035	0.0590571	0.0577461	0.0413985	0.0800102	0.0543157	0.0372576	0.0785465	0.0608332	0.0431621	0.0850956
51	0.0483069	0.036884	0.063036	0.0454011	0.0332575	0.061696	0.0510199	0.0380612	0.0680783	0.050022	0.035076	0.0708689	0.0470154	0.0323388	0.0678856	0.0527057	0.0359091	0.0767337	0.0417282	0.0304664	0.0569086	0.0392802	0.0278058	0.0552208	0.0440776	0.0313744	0.0615973	0.0595475	0.0427332	0.0824081	0.0560183	0.0384789	0.0808799	0.0627264	0.0445399	0.0876577
52	0.049731	0.038026	0.0647964	0.0467484	0.0342864	0.0634423	0.0525247	0.0392438	0.0699727	0.0514919	0.0361297	0.0728921	0.0484025	0.0332971	0.0698652	0.0542511	0.0370034	0.0788797	0.0431716	0.0316146	0.0586972	0.0406465	0.0288425	0.056998	0.0456029	0.032563	0.0635217	0.0610187	0.0439192	0.0841896	0.0574122	0.03955	0.0826476	0.064276	0.0457709	0.0895605
53	0.050843	0.039052	0.0659496	0.0478037	0.0351915	0.0646329	0.053703	0.0403036	0.0712265	0.0526511	0.0370532	0.0743082	0.0494997	0.0341309	0.0712784	0.0554732	0.037961	0.0803891	0.0443016	0.0326092	0.0599267	0.041719	0.02973	0.0582524	0.0467997	0.0335919	0.0648522	0.062191	0.0449859	0.0853881	0.0585267	0.0404965	0.0838828	0.0655145	0.0468849	0.0908409
54	0.0516813	0.0399812	0.0665679	0.0486027	0.0359898	0.0653364	0.054595	0.0412601	0.0719164	0.0535375	0.0378651	0.0751896	0.0503423	0.0348569	0.0721927	0.0564114	0.038801	0.0813383	0.0451527	0.03347	0.0606574	0.0425296	0.030486	0.0590414	0.0477042	0.0344811	0.0656534	0.0631045	0.0459543	0.0860778	0.0593989	0.0413373	0.0846554	0.0664834	0.047903	0.0915777
55	0.0522931	0.0408283	0.0667532	0.0491894	0.0366949	0.0656484	0.0552498	0.0421288	0.0721497	0.0541974	0.0385814	0.0756367	0.0509733	0.0354901	0.0727023	0.0571139	0.0395405	0.0818322	0.0457695	0.0342142	0.060981	0.0431202	0.0311266	0.0594514	0.0483629	0.0352489	0.0660221	0.0638058	0.0468387	0.0863623	0.0600723	0.0420868	0.0850614	0.0672314	0.0488398	0.0918797
56	0.0527314	0.0416045	0.0666273	0.0496133	0.0373187	0.065682	0.0557229	0.0429226	0.0720532	0.0546831	0.0392168	0.0757681	0.0514414	0.0360444	0.0729179	0.0576349	0.0401958	0.0819937	0.0462038	0.0348576	0.0610098	0.0435391	0.0316675	0.0595873	0.0488302	0.0359125	0.0660759	0.0643464	0.0476492	0.0863641	0.060595	0.0427563	0.0852136	0.0678118	0.0497059	0.0918755
57	0.0530533	0.0423183	0.066323	0.0499278	0.0378723	0.0655593	0.0560738	0.0436522	0.071765	0.055051	0.0397861	0.0757107	0.051799	0.0365345	0.0729584	0.058033	0.0407836	0.0819547	0.0465124	0.0354156	0.0608668	0.0438395	0.0321247	0.0595635	0.0491652	0.0364894	0.0659431	0.0647811	0.0483938	0.0862148	0.0610179	0.0433569	0.0852321	0.0682815	0.0505094	0.0917029
58	0.0533185	0.0429771	0.0659767	0.0501886	0.0383679	0.0654035	0.0563648	0.0443282	0.0714256	0.0553599	0.0403063	0.0755928	0.0521012	0.0369769	0.0729431	0.0583693	0.0413227	0.0818477	0.0467549	0.0359049	0.0606773	0.0440773	0.0325165	0.0594956	0.0494305	0.0369988	0.0657541	0.0651667	0.0490812	0.0860468	0.0613946	0.0439015	0.0852366	0.0686997	0.0512597	0.0915011
59	0.0535879	0.0435896	0.0657221	0.0504529	0.0388212	0.0653329	0.0566597	0.0449634	0.0711719	0.0556703	0.040798	0.0755373	0.0524044	0.0373922	0.0729868	0.0587068	0.0418361	0.0817999	0.0469926	0.0363461	0.0605617	0.0443102	0.0328657	0.0594947	0.0496901	0.037464	0.0656342	0.0655617	0.0497248	0.0859862	0.0617795	0.0444076	0.0853404	0.0691271	0.0519696	0.0914029
60	0.053924	0.0441708	0.0656828	0.0507792	0.0392551	0.0654558	0.0570237	0.0455769	0.0711311	0.0560443	0.0412884	0.0756575	0.0527666	0.0378069	0.0731955	0.0591098	0.0423531	0.0819292	0.0472881	0.0367671	0.0606303	0.0445969	0.0332013	0.0596625	0.0500099	0.0379154	0.0656988	0.066026	0.050346	0.0861465	0.0622289	0.0449003	0.0856456	0.069626	0.0526606	0.0915291
61	0.0543905	0.044748	0.0659674	0.0512273	0.0397029	0.0658674	0.0575237	0.0461996	0.0714155	0.0565453	0.0418136	0.0760552	0.0532473	0.0382551	0.0736649	0.0596446	0.0429112	0.082342	0.0477058	0.0372065	0.0609802	0.044998	0.0335613	0.0600897	0.0504571	0.0383935	0.0660508	0.0666212	0.0509789	0.086625	0.0628005	0.0454147	0.0862408	0.0702604	0.0533655	0.0919843
62	0.0550543	0.0453675	0.0666649	0.05186	0.040211	0.0666493	0.0582293	0.0468787	0.0721202	0.0572396	0.0424205	0.0768204	0.0539084	0.0387802	0.0744809	0.0603801	0.0435584	0.0831336	0.0483126	0.0377165	0.0616948	0.0455766	0.0339943	0.0608565	0.051102	0.0389513	0.0667798	0.0674112	0.0516726	0.0875012	0.0635544	0.0459971	0.0872008	0.0710971	0.0541328	0.0928557
63	0.0559864	0.0460977	0.0678455	0.052744	0.0408404	0.0678716	0.0592151	0.0476814	0.073324	0.058198	0.0431683	0.0780339	0.0548163	0.0394361	0.0757219	0.0613899	0.0443543	0.0843906	0.0491805	0.0383645	0.0628466	0.0464002	0.03456	0.062036	0.0520201	0.0396559	0.0679663	0.0684642	0.0524931	0.088839	0.0645544	0.0467063	0.0885891	0.0722066	0.0550275	0.0942142
64	0.0572653	0.0470296	0.0695661	0.0539531	0.0416671	0.0695987	0.060563	0.0486958	0.0750941	0.0594981	0.0441296	0.0797721	0.0560435	0.0402877	0.0774637	0.0627545	0.0453717	0.0861957	0.0503891	0.0392334	0.0645039	0.0475438	0.0353309	0.0636996	0.0532945	0.0405901	0.0696865	0.0698541	0.0535228	0.0906912	0.0658702	0.0476136	0.090462	0.0736661	0.056132	0.0961196
65	0.0589671	0.0482618	0.0718678	0.0555587	0.042771	0.0718827	0.0623524	0.0500175	0.0774813	0.0612146	0.0453803	0.0820988	0.0576603	0.0414023	0.0797712	0.0645517	0.0466862	0.0886182	0.0520167	0.0404104	0.0667246	0.0490814	0.0363817	0.0659108	0.0550073	0.0418406	0.0720058	0.0716512	0.054848	0.0930952	0.0675676	0.0487921	0.0928626	0.0755481	0.0575327	0.0986145
66	0.0611274	0.049854	0.0747494	0.0575945	0.0441984	0.0747333	0.0646201	0.0517046	0.080488	0.0633818	0.046963	0.0850286	0.0596986	0.0428168	0.0826618	0.0668163	0.0483401	0.0916741	0.054102	0.0419463	0.0695247	0.0510492	0.037755	0.0686905	0.0571984	0.0434582	0.0749426	0.0738847	0.0565164	0.0960472	0.0696743	0.0502808	0.0957934	0.0778828	0.0592779	0.101696
67	0.0637774	0.0518554	0.0782143	0.06009	0.0459883	0.0781614	0.0673982	0.0538058	0.084119	0.0660287	0.0489127	0.0885763	0.0621859	0.0445613	0.0861529	0.0695783	0.0503686	0.0953783	0.0566805	0.0438844	0.0729231	0.0534811	0.0394874	0.0720618	0.0599047	0.0454867	0.0785169	0.0765779	0.0585645	0.099546	0.0722122	0.0521101	0.099257	0.0806939	0.0614049	0.105362
68	0.0669571	0.0543176	0.0822818	0.0630826	0.048183	0.0821917	0.0707274	0.0563727	0.088395	0.0691925	0.0512676	0.0927718	0.065157	0.0466691	0.0902754	0.0728751	0.0528103	0.0997604	0.0597977	0.046274	0.0769548	0.0564198	0.0416213	0.0760625	0.0631729	0.0479759	0.0827652	0.0797599	0.0610296	0.103604	0.0752091	0.0543121	0.103268	0.0840108	0.0639509	0.109626
69	0.070715	0.0572967	0.0869858	0.0666185	0.0508302	0.0868619	0.0746576	0.0594617	0.0933515	0.0729184	0.0540698	0.0976592	0.0686544	0.0491772	0.0950744	0.0767527	0.055708	0.104865	0.0635098	0.0491712	0.0816705	0.0599186	0.0442054	0.0807454	0.0670607	0.050983	0.0877399	0.0834661	0.0639503	0.108249	0.0786981	0.056921	0.107854	0.0878693	0.0669541	0.114516
70	0.0751096	0.0608557	0.0923737	0.0707526	0.0539839	0.0922223	0.0792483	0.063136	0.0990378	0.0772602	0.0573657	0.103298	0.0727286	0.0521266	0.100609	0.0812656	0.059109	0.11075	0.0678846	0.0526408	0.0871367	0.0640415	0.0472964	0.0861789	0.0716376	0.0545735	0.0935096	0.0877377	0.0673668	0.113519	0.0827184	0.0599734	0.113052	0.0923112	0.0704539	0.120074
71	0.0802092	0.0650654	0.0985064	0.0755498	0.0577058	0.0983357	0.084569	0.0674661	0.105517	0.0822809	0.061206	0.109764	0.0774389	0.0555626	0.106953	0.0864773	0.0630652	0.117491	0.0730024	0.0567569	0.0934372	0.0688646	0.0509598	0.0924476	0.0769857	0.0588224	0.100161	0.0926228	0.0713206	0.119469	0.0873153	0.0635086	0.118913	0.0973847	0.0744904	0.126355
72	0.0860932	0.0700055	0.105459	0.0810849	0.0620657	0.105278	0.0907002	0.072531	0.112867	0.088053	0.0656458	0.11715	0.0828537	0.0595346	0.114197	0.0924607	0.067633	0.125179	0.0789572	0.0616034	0.100675	0.0744771	0.0552702	0.0996544	0.0832009	0.0638146	0.107798	0.0981757	0.075854	0.126169	0.0925405	0.0675678	0.125501	0.103144	0.0791041	0.133432
73	0.0928519	0.0757647	0.11332	0.0874441	0.0671422	0.11314	0.0977332	0.0784184	0.12118	0.094659	0.0707434	0.125567	0.0890509	0.0640962	0.12245	0.0992986	0.0728724	0.133924	0.0858576	0.0672742	0.108975	0.0809822	0.0603121	0.107923	0.0903935	0.0696446	0.11655	0.104457	0.0810082	0.133707	0.0984519	0.0721932	0.132894	0.109651	0.0843339	0.141395
74	0.100588	0.0824405	0.122198	0.0947246	0.0730229	0.122027	0.105771	0.0852239	0.130565	0.102192	0.0765599	0.13515	0.0961184	0.0693038	0.131838	0.107084	0.0788461	0.143855	0.0938279	0.0738717	0.118485	0.0884983	0.066179	0.117399	0.0986894	0.0764156	0.126566	0.111535	0.0868211	0.142189	0.105114	0.0774268	0.141186	0.116973	0.0902159	0.150354
75	0.109415	0.0901367	0.132217	0.103036	0.0798031	0.132061	0.114928	0.0930491	0.141152	0.110755	0.0831569	0.146053	0.104155	0.0752163	0.142511	0.115919	0.0856179	0.155125	0.103008	0.0815048	0.129386	0.0971599	0.0729729	0.128255	0.10823	0.0842374	0.138026	0.119484	0.0933254	0.151747	0.112597	0.0833086	0.150493	0.125182	0.0967808	0.160438
76	0.119459	0.0989609	0.143526	0.112498	0.0875848	0.143384	0.12533	0.102	0.153088	0.120462	0.0905951	0.158458	0.113268	0.0818934	0.154637	0.125917	0.0932505	0.167907	0.113556	0.0902857	0.141888	0.107117	0.0808019	0.140691	0.119172	0.0932233	0.15114	0.128383	0.100545	0.162535	0.120979	0.0898739	0.160946	0.134359	0.104052	0.171801
77	0.130857	0.10902	0.156301	0.123244	0.096474	0.156158	0.137113	0.11218	0.166547	0.131434	0.0989324	0.172569	0.123575	0.0893942	0.168408	0.137197	0.101804	0.182397	0.125642	0.100325	0.156238	0.118537	0.0897781	0.15494	0.131687	0.103486	0.16615	0.138318	0.108494	0.174733	0.130342	0.0971517	0.172702	0.144587	0.112044	0.184617
78	0.143754	0.120411	0.170744	0.135415	0.106577	0.170567	0.150418	0.123688	0.181727	0.143803	0.108222	0.188609	0.135204	0.097776	0.184036	0.149889	0.111333	0.198808	0.139452	0.111726	0.17272	0.131599	0.100013	0.171261	0.145959	0.115131	0.18333	0.149378	0.117174	0.188544	0.140773	0.105162	0.185937	0.155954	0.120763	0.199078
79	0.158303	0.13322	0.18709	0.149161	0.117996	0.186814	0.165396	0.136611	0.198848	0.157705	0.118512	0.206819	0.148286	0.107093	0.201744	0.164122	0.121887	0.217369	0.155181	0.124581	0.19165	0.146496	0.111616	0.189944	0.162177	0.128255	0.202982	0.161657	0.126578	0.204185	0.152363	0.113917	0.200844	0.168549	0.130204	0.21539
80	0.174657	0.147507	0.2056	0.164635	0.130824	0.205122	0.182193	0.151017	0.218152	0.173277	0.129843	0.227442	0.162958	0.117395	0.221762	0.18003	0.133507	0.238306	0.173027	0.138969	0.213364	0.163425	0.124688	0.211291	0.180535	0.142938	0.22542	0.175247	0.13669	0.221884	0.165205	0.123417	0.217629	0.182461	0.140357	0.23376
81	0.192967	0.163309	0.226553	0.181989	0.145139	0.225725	0.200953	0.16695	0.239888	0.190654	0.142253	0.25071	0.179356	0.128728	0.244313	0.19774	0.146228	0.261835	0.193185	0.15495	0.238194	0.182583	0.139317	0.235608	0.201217	0.159245	0.25095	0.190238	0.147493	0.241858	0.17939	0.133656	0.236501	0.197776	0.151211	0.254384
82	0.213371	0.180637	0.250226	0.201369	0.161001	0.248856	0.221805	0.184431	0.264297	0.209961	0.155772	0.27682	0.19761	0.141133	0.269594	0.21737	0.160076	0.288136	0.215831	0.172575	0.26644	0.204158	0.155582	0.263173	0.224389	0.177223	0.279838	0.206717	0.15897	0.264298	0.195006	0.144622	0.257655	0.214574	0.162753	0.277429
83	0.235987	0.199481	0.276862	0.222902	0.178448	0.274726	0.244853	0.203461	0.291582	0.231307	0.170428	0.305913	0.217837	0.154647	0.297752	0.239016	0.175073	0.31733	0.241114	0.191877	0.298322	0.228309	0.173544	0.294204	0.250181	0.196904	0.312269	0.224758	0.171111	0.289354	0.212133	0.156303	0.281258	0.232923	0.174973	0.303017
84	0.260899	0.21982	0.306637	0.246689	0.197497	0.303499	0.270168	0.22402	0.321878	0.254772	0.186243	0.338042	0.240131	0.169301	0.328862	0.26275	0.191236	0.349451	0.269132	0.212883	0.333938	0.255158	0.193251	0.328814	0.278674	0.218305	0.348298	0.244422	0.18391	0.317107	0.23084	0.168686	0.307427	0.252876	0.187867	0.331206
85	0.288147	0.241625	0.339616	0.272792	0.218144	0.335259	0.297773	0.246076	0.355214	0.280403	0.203238	0.373144	0.264557	0.185122	0.362896	0.288602	0.208575	0.38442	0.299915	0.235604	0.373209	0.284766	0.214731	0.366968	0.309875	0.241426	0.387808	0.265749	0.197369	0.347561	0.251179	0.181763	0.336213	0.274463	0.201433	0.361969
86	0.317713	0.264859	0.375722	0.30122	0.240363	0.369981	0.327633	0.269583	0.391483	0.308194	0.221422	0.41102	0.291136	0.202131	0.399699	0.316557	0.227093	0.422022	0.333406	0.260033	0.415847	0.317113	0.237992	0.40844	0.343704	0.266247	0.430475	0.288753	0.211492	0.380616	0.273177	0.195526	0.367576	0.297689	0.215671	0.395184
87	0.349506	0.289479	0.414714	0.33192	0.264113	0.407495	0.359638	0.294481	0.430417	0.338086	0.2408	0.451312	0.319838	0.220337	0.438973	0.34654	0.246783	0.461895	0.369444	0.28614	0.461328	0.352085	0.263017	0.452785	0.379976	0.292721	0.475746	0.313418	0.226284	0.416061	0.296835	0.209973	0.401375	0.322529	0.230583	0.430619
88	0.383356	0.315424	0.456169	0.364759	0.289328	0.447473	0.393604	0.320695	0.471582	0.369948	0.26136	0.493507	0.35057	0.239741	0.480268	0.378411	0.267627	0.503524	0.407751	0.313861	0.508896	0.389452	0.289756	0.499335	0.418392	0.320771	0.522853	0.339688	0.241749	0.453569	0.32212	0.2251	0.437355	0.348916	0.246167	0.46793
89	0.419008	0.342611	0.499497	0.399524	0.315922	0.48942	0.42926	0.348124	0.514385	0.403578	0.28308	0.536951	0.38317	0.26033	0.522989	0.411957	0.289593	0.546268	0.447927	0.343094	0.557602	0.428866	0.318124	0.547221	0.458535	0.35028	0.570852	0.367466	0.257887	0.492695	0.348959	0.240902	0.475146	0.376746	0.262419	0.506667
90	0.456121	0.370927	0.543962	0.435915	0.343783	0.532694	0.466257	0.376644	0.558101	0.4387	0.305917	0.580883	0.417402	0.282075	0.56643	0.446899	0.31263	0.589387	0.489461	0.373695	0.606369	0.469863	0.347996	0.595434	0.499886	0.381092	0.618693	0.396614	0.27469	0.532896	0.377238	0.257372	0.514269	0.405873	0.279328	0.54629
91	0.494276	0.40023	0.588728	0.473552	0.372769	0.576537	0.504172	0.406101	0.601923	0.474968	0.329808	0.624485	0.452961	0.304929	0.609809	0.482888	0.336671	0.632094	0.53175	0.405474	0.654086	0.511877	0.3792	0.642902	0.541841	0.413007	0.665312	0.426947	0.292145	0.57355	0.406798	0.274497	0.554159	0.436106	0.296876	0.586195
92	0.532995	0.430346	0.632924	0.511986	0.402711	0.620127	0.54253	0.436311	0.645019	0.511976	0.354669	0.666946	0.489475	0.328823	0.652331	0.519523	0.361627	0.673614	0.574132	0.438199	0.699713	0.554269	0.411524	0.688591	0.583746	0.445787	0.709726	0.458236	0.31023	0.613999	0.437439	0.292256	0.594193	0.467216	0.315038	0.625748
93	0.57176	0.46107	0.675706	0.550719	0.433411	0.662645	0.580824	0.467067	0.686593	0.549276	0.380395	0.707518	0.526523	0.353671	0.693243	0.556366	0.387388	0.713238	0.615925	0.471599	0.742365	0.596364	0.444713	0.731595	0.624941	0.479156	0.751116	0.490219	0.328914	0.653588	0.46892	0.310623	0.633729	0.498939	0.33378	0.664329
94	0.610045	0.492176	0.716324	0.58923	0.464645	0.703334	0.618542	0.498139	0.725951	0.586399	0.406859	0.745577	0.56365	0.379361	0.731891	0.592962	0.413825	0.750377	0.656475	0.505373	0.781384	0.637494	0.478477	0.771209	0.664796	0.512815	0.788884	0.522603	0.348155	0.691705	0.500967	0.329562	0.672145	0.530986	0.353061	0.701369
95	0.647338	0.523417	0.754171	0.627002	0.496172	0.741554	0.655196	0.529282	0.76254	0.622877	0.433915	0.780649	0.600391	0.405765	0.767758	0.628861	0.440792	0.78459	0.695194	0.539201	0.816364	0.677043	0.512504	0.806964	0.702755	0.546446	0.822675	0.555074	0.367906	0.727822	0.533282	0.349029	0.708883	0.563053	0.372827	0.73638
96	0.683179	0.554539	0.788817	0.66355	0.527736	0.776823	0.690346	0.560245	0.795973	0.65827	0.461398	0.812434	0.636298	0.432732	0.800492	0.663642	0.468127	0.815598	0.731597	0.572757	0.847144	0.714481	0.546465	0.838634	0.738364	0.579731	0.852368	0.587316	0.388106	0.761522	0.565554	0.368971	0.743474	0.594831	0.39302	0.768984
97	0.717172	0.585287	0.820013	0.698449	0.559078	0.808829	0.723623	0.590779	0.82604	0.692187	0.489133	0.840801	0.670954	0.460101	0.829903	0.696934	0.495656	0.843282	0.765321	0.60572	0.87378	0.749394	0.580031	0.866212	0.771292	0.612359	0.87804	0.619014	0.408689	0.792509	0.597471	0.389328	0.775566	0.626019	0.413572	0.798921
98	0.749008	0.615416	0.847681	0.731349	0.589943	0.83743	0.754741	0.620648	0.852686	0.724299	0.516936	0.865764	0.704001	0.487694	0.855954	0.728428	0.523202	0.867663	0.796134	0.637789	0.896491	0.781496	0.612886	0.889863	0.801332	0.644041	0.89992	0.649875	0.429581	0.820618	0.62873	0.410031	0.804927	0.656336	0.43441	0.826052
99	0.778472	0.644696	0.871889	0.761992	0.620089	0.862633	0.783505	0.64963	0.875992	0.754357	0.544617	0.887457	0.73515	0.515331	0.878732	0.75789	0.550581	0.888872	0.823929	0.668695	0.915607	0.810626	0.644741	0.90988	0.828399	0.674521	0.918335	0.679636	0.450703	0.845799	0.659054	0.431005	0.831447	0.685533	0.455453	0.850344
100	0.805438	0.672926	0.892815	0.790208	0.649295	0.884567	0.809807	0.677533	0.896141	0.782188	0.571993	0.906101	0.764186	0.542825	0.898422	0.785162	0.577616	0.907124	0.848712	0.698209	0.931521	0.836745	0.675337	0.926627	0.852512	0.703583	0.933669	0.708069	0.471968	0.868104	0.688198	0.45217	0.855119	0.713398	0.476617	0.871859

## Sheet: UA
	BELGIUM									BRUSSELS									FLANDERS									WALLONIA
	Both			Male			Female			Both			Male			Female			Both			Male			Female			Both			Male			Female
Age	mean	lwr	upr	mean	lwr	upr	mean	lwr	upr	mean	lwr	upr	mean	lwr	upr	mean	lwr	upr	mean	lwr	upr	mean	lwr	upr	mean	lwr	upr	mean	lwr	upr	mean	lwr	upr	mean	lwr	upr
ALL	0.192603	0.180078	0.205781	0.151523	0.135791	0.168721	0.231139	0.213803	0.249435	0.170504	0.151157	0.191768	0.133142	0.114564	0.154207	0.205291	0.180921	0.232015	0.177343	0.161228	0.194695	0.139148	0.12244	0.157727	0.21375	0.192643	0.236493	0.226377	0.202463	0.252223	0.179593	0.154877	0.207286	0.269101	0.240495	0.299766
15	0.107452	0.069688	0.162114	0.084667	0.0532023	0.132143	0.130429	0.0856788	0.193604	0.0992376	0.0634636	0.151906	0.0777991	0.0482774	0.12304	0.120127	0.0776466	0.181281	0.0941269	0.0601312	0.14439	0.0741243	0.0460503	0.11721	0.114701	0.0740608	0.173465	0.129957	0.0834774	0.196761	0.102888	0.0637281	0.16195	0.156549	0.101921	0.232865
16	0.105513	0.0706194	0.154776	0.0830803	0.0538646	0.126031	0.128105	0.0867403	0.185195	0.0975271	0.0643697	0.145115	0.0764113	0.0489301	0.117422	0.118081	0.0786814	0.173494	0.0924954	0.0610081	0.137848	0.0727968	0.0466898	0.11179	0.112736	0.0750689	0.165912	0.127792	0.08458	0.188535	0.101102	0.0645205	0.154988	0.153991	0.103185	0.223577
17	0.103634	0.0715149	0.147881	0.0815448	0.0544954	0.120312	0.125851	0.0877527	0.177277	0.0958704	0.0652383	0.138751	0.0750683	0.0495514	0.112175	0.116097	0.0796651	0.166183	0.0909156	0.061852	0.131718	0.0715124	0.0473017	0.106727	0.110831	0.076031	0.158821	0.125693	0.0856244	0.180805	0.0993718	0.0652648	0.148472	0.151508	0.104374	0.214822
18	0.101844	0.0723719	0.141486	0.0800826	0.0550934	0.115026	0.123702	0.0887121	0.169919	0.0942929	0.0660654	0.132865	0.0737905	0.050139	0.107338	0.114208	0.0805925	0.159412	0.0894116	0.0626596	0.126049	0.0702906	0.0478841	0.102058	0.109016	0.0769426	0.152254	0.123692	0.086605	0.173642	0.0977241	0.0659585	0.142455	0.149139	0.105483	0.206688
19	0.100167	0.0731853	0.135641	0.0787143	0.0556562	0.11021	0.121687	0.0896121	0.163184	0.0928187	0.0668451	0.127506	0.072597	0.0506901	0.102945	0.11244	0.0814565	0.153242	0.0880062	0.0634257	0.120883	0.0691494	0.0484343	0.0978136	0.107319	0.0777972	0.146266	0.12182	0.0875145	0.16711	0.0961836	0.0665981	0.136983	0.14692	0.106504	0.199254
20	0.0986289	0.0739481	0.130387	0.0774594	0.0561806	0.105894	0.119836	0.0904438	0.15713	0.0914703	0.0675697	0.122712	0.0715057	0.0512007	0.0990228	0.110821	0.0822478	0.147723	0.0867211	0.0641435	0.116258	0.0681062	0.0489488	0.09402	0.105765	0.0785862	0.140907	0.120106	0.0883442	0.161267	0.094774	0.0671802	0.132097	0.144886	0.107425	0.192593
21	0.0972521	0.0746512	0.125766	0.0763363	0.056663	0.102101	0.118177	0.0911966	0.151807	0.0902695	0.0682308	0.118521	0.0705338	0.0516674	0.0955949	0.109378	0.0829566	0.142902	0.0855767	0.0648046	0.112208	0.0671771	0.0494239	0.0906989	0.10438	0.0793001	0.136218	0.118578	0.0890854	0.156162	0.0935177	0.0677022	0.127827	0.143071	0.108238	0.186766
22	0.0960591	0.0752852	0.12181	0.0753626	0.0571006	0.0988529	0.116737	0.0918595	0.14726	0.0892371	0.0688201	0.114963	0.0696978	0.0520875	0.0926798	0.108135	0.0835743	0.13882	0.084593	0.0654011	0.108761	0.066378	0.0498567	0.0878678	0.103187	0.07993	0.132239	0.117264	0.0897317	0.151835	0.0924363	0.0681642	0.124199	0.141506	0.108935	0.181828
23	0.0950716	0.0758425	0.118551	0.0745556	0.0574934	0.0961648	0.115543	0.0924254	0.143527	0.0883937	0.0693325	0.112064	0.0690139	0.0524616	0.0902909	0.107117	0.0840971	0.135506	0.0837895	0.0659274	0.105942	0.0657244	0.050247	0.0855398	0.102211	0.0804714	0.128999	0.11619	0.0902826	0.148318	0.0915512	0.0685711	0.12123	0.140223	0.109519	0.177817
24	0.0943117	0.0763219	0.116009	0.0739327	0.0578462	0.0940462	0.11462	0.0928959	0.140636	0.08776	0.0697705	0.10984	0.0684984	0.0527956	0.0884355	0.10635	0.0845309	0.132982	0.0831858	0.0663841	0.103767	0.0652317	0.0505991	0.0837228	0.101474	0.0809283	0.126519	0.115382	0.0907481	0.145631	0.0908838	0.0689351	0.118928	0.139256	0.110003	0.17476
25	0.0938016	0.0767345	0.114195	0.0735116	0.0581722	0.0924986	0.113995	0.0932883	0.138596	0.0873573	0.0701483	0.108296	0.0681681	0.0531031	0.0871137	0.105857	0.0848966	0.131251	0.0828022	0.0667831	0.102243	0.0649161	0.0509248	0.0824176	0.101002	0.0813188	0.124803	0.114868	0.0911533	0.143777	0.0904561	0.069278	0.117292	0.138635	0.110419	0.172662
26	0.0935651	0.0771084	0.113104	0.0733111	0.0584951	0.0915151	0.113698	0.093641	0.1374	0.0872079	0.0704958	0.107424	0.0680407	0.0534075	0.0863177	0.105668	0.0852336	0.130303	0.0826599	0.0671512	0.101361	0.0647944	0.0512454	0.0816175	0.10082	0.081679	0.123842	0.114678	0.0915415	0.142743	0.0902911	0.0696328	0.116312	0.138395	0.11082	0.171509
27	0.0936273	0.0774923	0.112711	0.0733514	0.0588501	0.0910802	0.113758	0.0940155	0.137018	0.0873359	0.07086	0.107201	0.0681354	0.0537424	0.0860326	0.105809	0.0856001	0.13011	0.0827818	0.0675319	0.101102	0.0648849	0.0515924	0.0813085	0.100956	0.0820641	0.123611	0.114841	0.0919742	0.142501	0.0904138	0.0700436	0.115969	0.138574	0.111282	0.171269
28	0.094016	0.0779532	0.112983	0.0736548	0.0592835	0.0911722	0.114208	0.0944938	0.13741	0.0877676	0.0713026	0.107594	0.0684733	0.0541509	0.0862386	0.106312	0.0860704	0.130634	0.0831931	0.0679837	0.101435	0.0652078	0.0520072	0.0814712	0.101439	0.0825452	0.124072	0.115392	0.0925282	0.143014	0.0908514	0.0705644	0.116242	0.139209	0.111894	0.1719
29	0.0947624	0.0785715	0.113877	0.0742464	0.0598505	0.091767	0.115084	0.0951713	0.138526	0.0885328	0.0718955	0.10857	0.0690783	0.0546829	0.0869148	0.107213	0.0867292	0.131836	0.083922	0.0685763	0.102324	0.065786	0.0525384	0.0820845	0.102303	0.0832048	0.125186	0.116367	0.0932908	0.144243	0.0916346	0.0712565	0.117106	0.140344	0.11276	0.173358
30	0.0959017	0.0794351	0.115354	0.075155	0.0606121	0.0928425	0.11643	0.0961505	0.140323	0.089665	0.0727163	0.110095	0.0699775	0.0553935	0.0880431	0.108551	0.0876667	0.133681	0.0850007	0.0693852	0.103739	0.0666453	0.0532401	0.0831295	0.103586	0.0841312	0.126917	0.117809	0.0943551	0.146152	0.0927982	0.0721867	0.118543	0.14203	0.113989	0.175601
31	0.0974747	0.080635	0.117382	0.0764139	0.0616334	0.0943825	0.118292	0.0975366	0.142765	0.091203	0.0738453	0.112147	0.0712024	0.0563409	0.0896117	0.110371	0.0889751	0.136142	0.0864663	0.070489	0.105653	0.0678162	0.0541699	0.0845928	0.105333	0.0854151	0.129239	0.119766	0.0958175	0.148716	0.094382	0.0734258	0.120541	0.14432	0.115692	0.178602
32	0.0995284	0.0822635	0.119943	0.0780619	0.0629826	0.0963801	0.120725	0.0994355	0.145834	0.0931918	0.0753643	0.114713	0.0727898	0.0575861	0.0916173	0.112725	0.0907481	0.13921	0.0883619	0.0719681	0.108055	0.0693338	0.0553881	0.0864694	0.107593	0.0871491	0.132139	0.122294	0.0977767	0.151924	0.0964326	0.0750484	0.123099	0.147279	0.117983	0.182346
33	0.102118	0.0844159	0.123034	0.0801448	0.0647319	0.0988398	0.123793	0.101956	0.149529	0.095684	0.0773575	0.117798	0.0747832	0.0591936	0.0940681	0.115676	0.0930826	0.142889	0.0907378	0.0739056	0.110944	0.0712398	0.0569587	0.0887645	0.110426	0.0894287	0.13562	0.125457	0.100335	0.155779	0.0990043	0.0771335	0.126228	0.15098	0.12098	0.186838
34	0.105309	0.0871928	0.126667	0.0827169	0.0669589	0.101779	0.127572	0.105213	0.153866	0.0987414	0.0799145	0.121418	0.0772337	0.0612324	0.0969844	0.119294	0.0960803	0.147202	0.0936536	0.0763901	0.114336	0.0735834	0.0589505	0.0914954	0.113901	0.0923548	0.1397	0.12933	0.103602	0.160303	0.102161	0.0797664	0.129955	0.155508	0.124809	0.192101
35	0.109177	0.0907033	0.130872	0.0858426	0.0697486	0.10523	0.132148	0.109329	0.158881	0.102437	0.0831321	0.125611	0.0802024	0.0637785	0.100402	0.123662	0.0998512	0.152192	0.0971795	0.0795176	0.11826	0.0764234	0.0614392	0.0946933	0.118099	0.0960372	0.144418	0.134	0.107695	0.165537	0.105978	0.0830405	0.134322	0.16096	0.129601	0.19818
36	0.113813	0.0950685	0.135699	0.0895985	0.0731955	0.109244	0.137625	0.11444	0.164635	0.106858	0.087117	0.130432	0.0837618	0.0669155	0.104375	0.12888	0.104516	0.157923	0.101399	0.083395	0.122768	0.0798297	0.0645087	0.0984066	0.123115	0.100596	0.149835	0.139571	0.112743	0.171547	0.110543	0.0870586	0.139396	0.167452	0.135501	0.205148
37	0.119296	0.100391	0.141203	0.094054	0.0773799	0.113878	0.144091	0.120659	0.171189	0.112079	0.0919582	0.135943	0.0879778	0.0707144	0.108961	0.135033	0.110171	0.164467	0.106385	0.0881126	0.127915	0.0838658	0.0682311	0.102688	0.129033	0.106131	0.156013	0.146129	0.118851	0.178399	0.115937	0.0919066	0.145245	0.175075	0.142625	0.213073
38	0.125605	0.106648	0.147376	0.0991969	0.0822869	0.119131	0.151512	0.127947	0.17853	0.118082	0.0976309	0.142142	0.0928399	0.0751594	0.114166	0.14209	0.116783	0.171814	0.112122	0.0936517	0.133697	0.0885228	0.072594	0.107541	0.135826	0.112613	0.162944	0.15364	0.125983	0.186076	0.122137	0.0975619	0.151861	0.183781	0.150919	0.221928
39	0.132679	0.113759	0.154199	0.104985	0.0878574	0.124995	0.159812	0.136203	0.186629	0.124812	0.104059	0.149015	0.0983098	0.080196	0.119981	0.149982	0.124256	0.179939	0.118558	0.099943	0.1401	0.0937647	0.0775468	0.112959	0.143428	0.119954	0.170605	0.162025	0.13404	0.194539	0.129088	0.103954	0.159218	0.193466	0.160257	0.231658
40	0.140443	0.121605	0.161662	0.111363	0.0940028	0.131463	0.168892	0.145281	0.195461	0.132198	0.111134	0.156551	0.104335	0.0857449	0.126399	0.158618	0.13246	0.188816	0.125627	0.106884	0.147115	0.0995424	0.083013	0.118936	0.151753	0.128028	0.178973	0.171182	0.142885	0.203751	0.136714	0.110983	0.167287	0.204004	0.170472	0.242206
41	0.148796	0.130018	0.169757	0.118254	0.100601	0.138527	0.178627	0.154985	0.205	0.140146	0.118709	0.164732	0.110846	0.0916985	0.133405	0.167881	0.141223	0.198407	0.13324	0.11433	0.154732	0.105789	0.0888861	0.125464	0.160692	0.136669	0.188018	0.180985	0.152336	0.213664	0.144918	0.118516	0.176027	0.21524	0.181349	0.253502
42	0.15761	0.138779	0.178467	0.125558	0.107494	0.146162	0.188862	0.165068	0.215202	0.148536	0.126598	0.173521	0.117748	0.0979219	0.140962	0.177625	0.150336	0.20865	0.141285	0.122099	0.162926	0.112417	0.0950302	0.132518	0.170104	0.145669	0.197691	0.191276	0.162171	0.224207	0.153575	0.126388	0.18537	0.226983	0.19263	0.265449
43	0.166727	0.147634	0.187746	0.13315	0.114501	0.154308	0.199409	0.175251	0.225984	0.157218	0.13459	0.182846	0.124923	0.104259	0.149001	0.187672	0.159562	0.21944	0.149617	0.129974	0.171643	0.11931	0.101286	0.140041	0.179819	0.154787	0.207904	0.201863	0.172136	0.235266	0.162531	0.134409	0.195209	0.23901	0.204024	0.277901
44	0.175957	0.156318	0.197486	0.140874	0.121429	0.162854	0.210044	0.185243	0.237199	0.166009	0.142464	0.192573	0.132222	0.110542	0.157402	0.197809	0.168652	0.230609	0.158063	0.137729	0.18077	0.126329	0.107485	0.147929	0.189631	0.163772	0.218506	0.212522	0.181962	0.246666	0.171597	0.142374	0.205381	0.251063	0.215231	0.290652
45	0.185077	0.164583	0.20749	0.148542	0.128092	0.171614	0.220512	0.19477	0.248605	0.174698	0.150002	0.202491	0.13947	0.116604	0.165978	0.207791	0.177362	0.241905	0.166419	0.145147	0.190115	0.133303	0.113457	0.156011	0.199303	0.172379	0.229267	0.222994	0.191387	0.258154	0.180554	0.150074	0.215654	0.262852	0.225958	0.303409
46	0.193835	0.172222	0.217449	0.155943	0.13432	0.180321	0.230527	0.203595	0.259859	0.183042	0.15701	0.212303	0.146463	0.122284	0.174473	0.217344	0.185468	0.252997	0.174452	0.152034	0.199397	0.140037	0.119046	0.16404	0.208568	0.180386	0.239865	0.232994	0.200169	0.269389	0.189154	0.157307	0.22572	0.274061	0.235936	0.315801
47	0.201956	0.179069	0.226959	0.162836	0.139959	0.188632	0.239781	0.21152	0.270522	0.190777	0.163313	0.221635	0.152973	0.127431	0.182564	0.22617	0.192767	0.263473	0.181904	0.158226	0.208247	0.146311	0.12411	0.171705	0.217137	0.187598	0.249896	0.242213	0.208092	0.279951	0.197123	0.163885	0.235206	0.284354	0.244925	0.327378
48	0.209145	0.184985	0.235548	0.168966	0.144874	0.196146	0.247949	0.218375	0.280094	0.197617	0.168752	0.230053	0.158756	0.131904	0.189878	0.233955	0.199072	0.272868	0.1885	0.163579	0.216235	0.151887	0.128516	0.178636	0.224701	0.193841	0.258897	0.250327	0.214963	0.289364	0.204172	0.16963	0.243685	0.293382	0.252713	0.337639
49	0.215099	0.189843	0.242707	0.174065	0.148932	0.202431	0.254701	0.224005	0.288041	0.20327	0.173178	0.237092	0.163554	0.135567	0.196009	0.240377	0.204211	0.280688	0.193955	0.16796	0.222897	0.156516	0.132139	0.184434	0.230946	0.198953	0.266373	0.257005	0.220608	0.297119	0.210001	0.174372	0.250699	0.300795	0.259105	0.346059
50	0.219516	0.193516	0.247935	0.177863	0.152004	0.207048	0.259706	0.228258	0.293836	0.207445	0.176447	0.242286	0.167111	0.138284	0.20055	0.245116	0.208012	0.286444	0.197986	0.171236	0.227766	0.159949	0.134857	0.188693	0.235556	0.202775	0.271829	0.261921	0.224857	0.302708	0.214309	0.177948	0.255789	0.306244	0.263914	0.352115
51	0.222182	0.19592	0.250865	0.180169	0.154002	0.209681	0.262733	0.231033	0.297103	0.209933	0.178458	0.245302	0.169243	0.139963	0.203202	0.247947	0.210359	0.289785	0.20039	0.173323	0.230505	0.162008	0.136584	0.191117	0.238312	0.205205	0.274912	0.264844	0.2276	0.30577	0.216887	0.180248	0.258624	0.309492	0.26702	0.355442
52	0.223212	0.197164	0.251622	0.181073	0.155007	0.210431	0.263918	0.232454	0.297989	0.210847	0.179314	0.246261	0.170038	0.140682	0.204065	0.249	0.21137	0.290859	0.201273	0.174318	0.231228	0.162776	0.137397	0.1918	0.239337	0.206355	0.27576	0.265917	0.228967	0.306459	0.217847	0.18137	0.259336	0.310699	0.268569	0.356219
53	0.222827	0.197397	0.25051	0.180762	0.155145	0.20956	0.263511	0.232693	0.296831	0.210401	0.179163	0.245457	0.169675	0.140562	0.203391	0.248519	0.211216	0.289988	0.200842	0.174363	0.230221	0.162425	0.13741	0.190986	0.238869	0.206389	0.274691	0.265394	0.229139	0.305114	0.217408	0.181465	0.258226	0.310148	0.268765	0.354811
54	0.22127	0.196764	0.247887	0.179442	0.154537	0.207377	0.26178	0.231916	0.294017	0.208831	0.178152	0.243229	0.168353	0.139727	0.201471	0.246766	0.210065	0.287544	0.199325	0.173595	0.227817	0.161149	0.136739	0.188962	0.237162	0.205467	0.272072	0.26355	0.22829	0.302123	0.215811	0.180683	0.255639	0.308138	0.267803	0.35163
55	0.218793	0.195399	0.244138	0.177331	0.153305	0.204215	0.259006	0.230279	0.289967	0.206381	0.176427	0.239939	0.166282	0.1383	0.198621	0.244013	0.208084	0.283921	0.196959	0.172146	0.224378	0.159149	0.135498	0.18604	0.234483	0.203743	0.268298	0.260669	0.226591	0.297899	0.213306	0.179174	0.251944	0.304977	0.265872	0.347115
56	0.215651	0.193431	0.239666	0.174648	0.151566	0.200415	0.255471	0.227931	0.28511	0.203299	0.174133	0.235955	0.163673	0.136407	0.195157	0.240535	0.205441	0.279515	0.193983	0.170147	0.220272	0.15663	0.133802	0.182533	0.2311	0.201371	0.263768	0.257039	0.224207	0.292864	0.210144	0.177088	0.247515	0.300977	0.263157	0.341711
57	0.212095	0.190982	0.234864	0.17161	0.149441	0.196308	0.251455	0.225022	0.279871	0.199829	0.171418	0.231632	0.160732	0.134175	0.191384	0.236605	0.202309	0.274712	0.190634	0.167727	0.215857	0.153793	0.131766	0.178745	0.227277	0.198505	0.258873	0.252943	0.221304	0.287436	0.206575	0.174576	0.242716	0.296444	0.259846	0.335859
58	0.208368	0.188181	0.230107	0.168423	0.147052	0.192201	0.247228	0.22171	0.274647	0.196204	0.168438	0.227297	0.15766	0.131736	0.187584	0.232484	0.198866	0.269871	0.187137	0.165021	0.211467	0.15083	0.129508	0.174956	0.223272	0.195308	0.253975	0.248655	0.218052	0.282003	0.202839	0.171791	0.237886	0.29168	0.25613	0.329975
59	0.204702	0.18517	0.225723	0.165286	0.144532	0.188364	0.243053	0.218168	0.269796	0.19265	0.165357	0.223242	0.154645	0.129227	0.184006	0.228426	0.195302	0.265314	0.183709	0.162175	0.207395	0.147922	0.127156	0.171414	0.219328	0.191956	0.249398	0.244439	0.214635	0.276921	0.199164	0.168898	0.23333	0.286974	0.25222	0.324439
60	0.201317	0.182119	0.22199	0.162385	0.14203	0.185028	0.239177	0.214601	0.265616	0.189376	0.162353	0.219717	0.151863	0.126792	0.180864	0.224669	0.191824	0.26132	0.180554	0.159354	0.203889	0.14524	0.124846	0.168326	0.215679	0.188644	0.245418	0.240547	0.211258	0.272494	0.195766	0.166069	0.229314	0.282608	0.248347	0.319585
61	0.198424	0.179236	0.219117	0.159895	0.139709	0.182378	0.235841	0.211247	0.262346	0.186584	0.159617	0.216932	0.149481	0.124584	0.17834	0.221444	0.188649	0.258127	0.177863	0.156746	0.201147	0.142945	0.122727	0.165865	0.212548	0.185586	0.242262	0.237222	0.208146	0.268979	0.192853	0.163491	0.226063	0.27885	0.244769	0.315692
62	0.196223	0.176761	0.217262	0.157984	0.137753	0.180563	0.233274	0.208375	0.260171	0.184467	0.157352	0.215063	0.14766	0.122762	0.17659	0.218971	0.186009	0.255938	0.175824	0.154557	0.199328	0.14119	0.12096	0.164171	0.210148	0.183017	0.240118	0.234696	0.205552	0.266585	0.190621	0.161362	0.22377	0.275963	0.241769	0.312998
63	0.194914	0.174959	0.216547	0.156817	0.136357	0.179708	0.231704	0.206275	0.259244	0.183215	0.155771	0.214267	0.146554	0.121492	0.175753	0.217468	0.184145	0.254937	0.174618	0.153009	0.198564	0.140125	0.119717	0.163367	0.208689	0.181187	0.239146	0.233201	0.203747	0.265493	0.189266	0.159894	0.222603	0.274206	0.23965	0.311703
64	0.194698	0.174108	0.217083	0.156562	0.135727	0.179929	0.231361	0.205252	0.259706	0.183022	0.155098	0.214696	0.146324	0.120946	0.175962	0.217155	0.183309	0.255296	0.174432	0.152336	0.19898	0.139903	0.119176	0.163566	0.208385	0.180355	0.239498	0.23297	0.203017	0.265867	0.188983	0.159309	0.22272	0.27384	0.238733	0.311994
65	0.195748	0.174449	0.218957	0.157362	0.136046	0.181317	0.232438	0.20557	0.261661	0.184052	0.155526	0.216469	0.147105	0.121277	0.177324	0.218218	0.183721	0.257152	0.175424	0.152744	0.200674	0.140656	0.119496	0.164861	0.209416	0.18075	0.24129	0.2342	0.203616	0.267834	0.189942	0.159805	0.224245	0.275083	0.239299	0.314009
66	0.198085	0.176051	0.222133	0.159235	0.137363	0.183848	0.234956	0.207298	0.265071	0.186328	0.157106	0.219568	0.148917	0.122524	0.17983	0.220679	0.185433	0.260481	0.177616	0.154289	0.203621	0.142402	0.120722	0.167235	0.211805	0.182431	0.244494	0.236916	0.205612	0.271358	0.192162	0.161435	0.227154	0.277957	0.24142	0.317708
67	0.201708	0.178939	0.226574	0.162183	0.139701	0.187495	0.238907	0.210458	0.269888	0.189849	0.159858	0.223968	0.151761	0.124704	0.183458	0.224532	0.188462	0.265248	0.18101	0.156996	0.207791	0.145143	0.122871	0.170666	0.215546	0.185418	0.249072	0.24111	0.209031	0.276392	0.195642	0.164218	0.231414	0.282448	0.245117	0.323031
68	0.206631	0.183144	0.232274	0.166222	0.143087	0.192257	0.244299	0.215075	0.276097	0.194634	0.163808	0.229667	0.155656	0.127841	0.188215	0.229788	0.192833	0.271442	0.185622	0.160895	0.213185	0.148897	0.125971	0.175159	0.220651	0.189739	0.255014	0.246793	0.213902	0.282921	0.200397	0.168185	0.237019	0.288555	0.250413	0.32995
69	0.212883	0.188702	0.23925	0.171381	0.147559	0.198155	0.251152	0.221182	0.283704	0.200713	0.168997	0.236686	0.160633	0.131972	0.194126	0.236472	0.198581	0.279074	0.191487	0.166026	0.219825	0.153697	0.130058	0.180741	0.227148	0.19543	0.262335	0.253988	0.220261	0.290952	0.206455	0.173372	0.243987	0.296291	0.257335	0.338456
70	0.220507	0.195657	0.247543	0.177706	0.153159	0.205233	0.259498	0.228813	0.292737	0.208134	0.175472	0.245067	0.166739	0.137141	0.201235	0.244621	0.205748	0.288172	0.198652	0.172437	0.227754	0.15959	0.135178	0.187455	0.235074	0.202534	0.271066	0.262731	0.228149	0.300513	0.213859	0.179824	0.252353	0.305676	0.265913	0.348561
71	0.229556	0.204058	0.257211	0.185251	0.159939	0.213552	0.26938	0.238007	0.303242	0.216953	0.18329	0.254869	0.174033	0.143403	0.209604	0.254282	0.214384	0.298781	0.207174	0.180185	0.237037	0.166634	0.141384	0.195368	0.244481	0.211099	0.281259	0.273065	0.237609	0.311649	0.222663	0.187592	0.262175	0.316737	0.276176	0.36029
72	0.240091	0.213954	0.268332	0.194085	0.167954	0.223191	0.280842	0.2488	0.315279	0.227238	0.192511	0.266163	0.182585	0.150818	0.219314	0.265509	0.224539	0.310958	0.217124	0.189328	0.247754	0.174899	0.148734	0.204561	0.255424	0.221176	0.29298	0.285042	0.248683	0.324421	0.232931	0.196731	0.273523	0.329504	0.288148	0.373679
73	0.25218	0.225389	0.281001	0.204283	0.177261	0.234251	0.293936	0.261223	0.328922	0.239062	0.203198	0.27904	0.192475	0.159453	0.23046	0.278361	0.236264	0.32477	0.228578	0.199925	0.260004	0.184467	0.157292	0.215137	0.267966	0.232811	0.306309	0.298712	0.261407	0.338898	0.244731	0.207296	0.286484	0.344003	0.301842	0.388773
74	0.265894	0.238397	0.295332	0.215927	0.187914	0.246848	0.308708	0.275288	0.344257	0.252506	0.215411	0.293598	0.203791	0.169376	0.243152	0.292896	0.249602	0.340293	0.241619	0.212028	0.273903	0.195426	0.167121	0.227217	0.282169	0.246043	0.321339	0.314125	0.275804	0.355159	0.258138	0.219337	0.301155	0.360253	0.317254	0.405618
75	0.2813	0.252992	0.311454	0.229105	0.199956	0.261117	0.3252	0.29099	0.361382	0.267645	0.229199	0.309946	0.216627	0.180652	0.257515	0.309165	0.264583	0.357606	0.256329	0.22568	0.289584	0.207873	0.17828	0.240937	0.298094	0.260896	0.338169	0.331321	0.291876	0.373287	0.273223	0.232897	0.31764	0.378263	0.334357	0.424259
76	0.29846	0.269163	0.329509	0.243905	0.213422	0.277207	0.343441	0.308293	0.380392	0.284553	0.244599	0.328198	0.231079	0.193341	0.273684	0.327212	0.28122	0.376783	0.272789	0.240902	0.307188	0.221906	0.19082	0.256452	0.31579	0.27737	0.356904	0.350327	0.309602	0.393357	0.290053	0.248003	0.336046	0.398019	0.353095	0.44473
77	0.317424	0.286868	0.349639	0.260409	0.228326	0.295276	0.363444	0.327132	0.401381	0.303291	0.261624	0.348464	0.247241	0.207494	0.291799	0.347063	0.299497	0.397893	0.291068	0.257693	0.326861	0.237625	0.204779	0.273925	0.335293	0.295442	0.37764	0.37115	0.328932	0.415433	0.308683	0.264665	0.356474	0.419488	0.373379	0.467046
78	0.338221	0.306039	0.371973	0.278694	0.244664	0.315479	0.385194	0.347409	0.424417	0.323904	0.280263	0.370839	0.2652	0.223145	0.311997	0.36872	0.319372	0.420978	0.311221	0.276026	0.348742	0.255122	0.22018	0.293521	0.356617	0.315055	0.400457	0.393768	0.349785	0.439544	0.329153	0.282871	0.379005	0.442601	0.395089	0.491186
79	0.360855	0.326585	0.396603	0.298817	0.262416	0.337954	0.408651	0.369001	0.449526	0.34641	0.30048	0.395393	0.285027	0.240311	0.334401	0.392156	0.340771	0.446047	0.33328	0.295851	0.372937	0.274477	0.237029	0.315395	0.379747	0.336129	0.425399	0.418127	0.372052	0.465675	0.351475	0.302587	0.403689	0.467257	0.418077	0.517081
80	0.385295	0.348403	0.423555	0.320816	0.281545	0.362799	0.433734	0.391771	0.47667	0.370795	0.322209	0.422143	0.306775	0.25899	0.359103	0.417307	0.363592	0.47306	0.357245	0.317096	0.399504	0.295753	0.255318	0.339671	0.404632	0.358556	0.452453	0.444129	0.395603	0.493745	0.375629	0.323754	0.430523	0.493316	0.442172	0.544599
81	0.411472	0.371388	0.452767	0.344696	0.302003	0.390053	0.460323	0.415572	0.505723	0.397001	0.34536	0.451045	0.330465	0.279161	0.386147	0.444066	0.387704	0.501905	0.383077	0.339677	0.428425	0.318984	0.275023	0.36642	0.431179	0.382211	0.481531	0.471634	0.420288	0.523587	0.401556	0.346295	0.459438	0.520593	0.467191	0.57353
82	0.439267	0.395433	0.484069	0.370425	0.323734	0.419672	0.488252	0.440259	0.536463	0.424927	0.369821	0.481963	0.356082	0.300782	0.415508	0.472277	0.412957	0.532391	0.41069	0.363501	0.459582	0.344168	0.29611	0.395643	0.459249	0.40696	0.51245	0.500452	0.445946	0.554946	0.429152	0.370111	0.490281	0.548867	0.492941	0.603585
83	0.468512	0.420434	0.517183	0.397925	0.346676	0.451514	0.517311	0.465687	0.568569	0.454413	0.395464	0.514669	0.383564	0.323795	0.447072	0.501739	0.439185	0.56424	0.439944	0.388465	0.492749	0.371261	0.318533	0.427245	0.48865	0.432657	0.544929	0.530346	0.47241	0.587474	0.45826	0.395088	0.522803	0.577875	0.519232	0.634401
84	0.498988	0.446276	0.551723	0.427065	0.370755	0.48533	0.547247	0.491712	0.601631	0.485248	0.422143	0.548826	0.412795	0.34812	0.480627	0.532201	0.466209	0.597086	0.470644	0.414457	0.527586	0.400163	0.342233	0.461025	0.519145	0.459152	0.578591	0.561034	0.499503	0.620744	0.488671	0.421094	0.556664	0.607324	0.54587	0.665558
85	0.530424	0.472834	0.587214	0.457659	0.395886	0.520763	0.577769	0.518182	0.635176	0.517163	0.449698	0.584007	0.443601	0.37366	0.515851	0.563368	0.49384	0.630492	0.502537	0.441348	0.563649	0.430717	0.367136	0.496668	0.550447	0.486282	0.612977	0.592199	0.527041	0.65427	0.520123	0.447982	0.591435	0.636901	0.572665	0.696598
86	0.562505	0.499965	0.62312	0.489467	0.421961	0.557359	0.608558	0.544938	0.668691	0.549841	0.477953	0.619707	0.475747	0.400296	0.552322	0.594914	0.521884	0.663971	0.535316	0.468994	0.600412	0.462706	0.393146	0.533748	0.582234	0.513878	0.64757	0.623497	0.554831	0.687537	0.55231	0.475585	0.626623	0.666281	0.599427	0.727058
87	0.594886	0.527506	0.658871	0.522193	0.448855	0.594587	0.639276	0.571811	0.701658	0.582927	0.506717	0.655372	0.508941	0.427887	0.589529	0.626487	0.550137	0.697015	0.568632	0.497227	0.637293	0.495851	0.420146	0.571748	0.614154	0.541758	0.681831	0.65457	0.582673	0.720033	0.584887	0.503723	0.661692	0.695142	0.625968	0.7565
88	0.627198	0.555275	0.693902	0.5555	0.476418	0.631868	0.669586	0.598625	0.733585	0.616038	0.535782	0.690436	0.542841	0.456268	0.626902	0.657729	0.578394	0.729127	0.602103	0.52586	0.673694	0.52982	0.44799	0.610078	0.645845	0.569728	0.715228	0.685066	0.610364	0.751282	0.617484	0.532198	0.6961	0.72318	0.652105	0.784531
89	0.65907	0.583077	0.727681	0.589017	0.504477	0.668608	0.699159	0.625197	0.764034	0.648783	0.564932	0.724358	0.577065	0.485252	0.663847	0.688291	0.606444	0.759857	0.635333	0.554688	0.709033	0.564236	0.476509	0.648119	0.676947	0.597589	0.747274	0.714651	0.637701	0.780874	0.649726	0.560802	0.729335	0.750118	0.677663	0.810833
90	0.690144	0.610709	0.759746	0.622356	0.532842	0.704238	0.727693	0.651345	0.792645	0.68078	0.593942	0.756656	0.611209	0.514633	0.699779	0.717846	0.634085	0.788819	0.667928	0.583495	0.742789	0.598696	0.50551	0.685254	0.70712	0.62514	0.777551	0.743024	0.664484	0.808478	0.681244	0.589319	0.76094	0.775721	0.702476	0.835165
91	0.720089	0.637966	0.789724	0.655129	0.561305	0.738245	0.754925	0.676895	0.819146	0.711674	0.622586	0.78693	0.644864	0.544189	0.734166	0.746105	0.661117	0.81572	0.699517	0.612055	0.774524	0.632783	0.53478	0.720915	0.736058	0.652182	0.805733	0.76993	0.690526	0.833863	0.711697	0.61753	0.790543	0.7998	0.726398	0.857376
92	0.74862	0.664646	0.817344	0.686971	0.589652	0.770204	0.780638	0.70168	0.843363	0.741155	0.650646	0.814887	0.677638	0.573685	0.766558	0.772827	0.687358	0.840358	0.729769	0.640148	0.803907	0.666095	0.564093	0.754612	0.763503	0.678525	0.831593	0.795169	0.715655	0.856893	0.740782	0.645223	0.817868	0.822217	0.749298	0.877397
93	0.775503	0.690563	0.842447	0.717548	0.617667	0.799794	0.804667	0.725552	0.865213	0.768966	0.677917	0.840339	0.709173	0.602889	0.796607	0.797828	0.712641	0.86263	0.758405	0.66756	0.83072	0.698256	0.593215	0.78596	0.78925	0.703996	0.855007	0.818597	0.739724	0.877526	0.768252	0.672195	0.842746	0.842888	0.77107	0.895236
94	0.800566	0.715545	0.86497	0.746579	0.645139	0.826806	0.826904	0.748382	0.884697	0.794915	0.704211	0.863207	0.73916	0.63157	0.824083	0.820982	0.736824	0.882518	0.785208	0.694094	0.854859	0.728938	0.621914	0.814694	0.813156	0.728441	0.875944	0.84013	0.762608	0.895796	0.793918	0.698264	0.865106	0.861775	0.791631	0.910962
95	0.823696	0.739447	0.884942	0.773841	0.671869	0.851144	0.847292	0.770067	0.901885	0.818873	0.729369	0.883504	0.767353	0.659511	0.848866	0.842218	0.759791	0.900081	0.81003	0.719577	0.876321	0.757874	0.649969	0.840669	0.835135	0.751732	0.894453	0.859739	0.784211	0.911804	0.817652	0.723268	0.884965	0.878886	0.810923	0.924689
96	0.844841	0.76215	0.902464	0.799174	0.697678	0.872807	0.865824	0.790527	0.9169	0.840777	0.753259	0.90132	0.793572	0.686514	0.870942	0.861523	0.781452	0.915433	0.832785	0.743863	0.895186	0.784862	0.677172	0.863851	0.855157	0.773766	0.910648	0.87744	0.804466	0.925696	0.839389	0.747075	0.902412	0.894268	0.828913	0.936568
97	0.864002	0.78356	0.917687	0.822483	0.722412	0.891878	0.882535	0.809707	0.929903	0.860621	0.775779	0.916802	0.817708	0.712408	0.890385	0.878926	0.801748	0.92873	0.85345	0.766836	0.911599	0.809772	0.703344	0.884299	0.873242	0.794472	0.924685	0.893294	0.823333	0.937649	0.859119	0.769578	0.91759	0.907995	0.845589	0.946767
98	0.881223	0.803618	0.930802	0.843734	0.745943	0.908501	0.897493	0.827579	0.941076	0.878446	0.796862	0.930137	0.839713	0.737052	0.907332	0.894495	0.820644	0.940155	0.872057	0.788413	0.925749	0.832539	0.728328	0.902147	0.88945	0.813803	0.936752	0.907391	0.8408	0.947855	0.876878	0.790706	0.930681	0.920165	0.860964	0.955463
99	0.896588	0.822289	0.942014	0.862945	0.768172	0.922864	0.910793	0.844138	0.950611	0.894337	0.816471	0.941532	0.8596	0.760334	0.921971	0.908327	0.838134	0.9499	0.888676	0.808541	0.937849	0.853161	0.752003	0.917579	0.903873	0.831741	0.94705	0.919843	0.856877	0.956513	0.892743	0.810412	0.941885	0.930892	0.875064	0.962833
100	0.910204	0.839566	0.951536	0.880176	0.789033	0.935177	0.922548	0.859397	0.958699	0.908404	0.834595	0.951203	0.877429	0.782178	0.934515	0.92054	0.854233	0.958162	0.903416	0.827199	0.948125	0.871685	0.774278	0.930813	0.916625	0.848291	0.955783	0.930777	0.871596	0.963815	0.906819	0.828681	0.951408	0.940297	0.887935	0.969045

## Sheet: PD
	BELGIUM									BRUSSELS									FLANDERS									WALLONIA
	Both			Male			Female			Both			Male			Female			Both			Male			Female			Both			Male			Female
Age	mean	lwr	upr	mean	lwr	upr	mean	lwr	upr	mean	lwr	upr	mean	lwr	upr	mean	lwr	upr	mean	lwr	upr	mean	lwr	upr	mean	lwr	upr	mean	lwr	upr	mean	lwr	upr	mean	lwr	upr
ALL	0.561675	0.545141	0.578074	0.508961	0.485552	0.53233	0.611126	0.590358	0.631498	0.515726	0.487699	0.543655	0.462026	0.430093	0.494274	0.565725	0.534315	0.596616	0.530373	0.507105	0.55351	0.477422	0.449057	0.505932	0.580845	0.554218	0.60701	0.631128	0.60353	0.657894	0.580528	0.547324	0.613018	0.677337	0.648271	0.705093
15	0.362717	0.329824	0.396948	0.336711	0.290732	0.386003	0.391434	0.347652	0.437036	0.321076	0.271548	0.374987	0.298494	0.243534	0.359955	0.350079	0.29058	0.414641	0.352211	0.307196	0.400014	0.326738	0.273315	0.385069	0.380556	0.326082	0.438214	0.38684	0.328219	0.448934	0.359614	0.292503	0.432707	0.415506	0.349253	0.484961
16	0.368417	0.336005	0.402062	0.3416	0.296242	0.390054	0.397863	0.354764	0.442608	0.326945	0.278	0.379972	0.303461	0.249131	0.363897	0.356648	0.297869	0.420086	0.357146	0.312751	0.404138	0.330882	0.278182	0.388197	0.386211	0.332527	0.442812	0.394272	0.336488	0.455173	0.366213	0.299922	0.437988	0.423708	0.358493	0.491693
17	0.374154	0.342239	0.407204	0.346524	0.301806	0.394127	0.404328	0.361933	0.448202	0.332868	0.284537	0.384992	0.308474	0.254804	0.367867	0.363271	0.305253	0.425561	0.362112	0.318354	0.408282	0.335053	0.283096	0.391342	0.391896	0.339027	0.447429	0.401754	0.344848	0.461437	0.372861	0.307438	0.443295	0.431952	0.367827	0.498441
18	0.379927	0.348521	0.412372	0.35148	0.307422	0.398221	0.410827	0.369156	0.453818	0.338845	0.291156	0.390046	0.313532	0.260552	0.371867	0.369946	0.312728	0.431066	0.367107	0.324003	0.412447	0.33925	0.288054	0.394504	0.397611	0.34558	0.452065	0.409282	0.353294	0.467726	0.379558	0.315047	0.448628	0.440234	0.377248	0.505204
19	0.385734	0.354851	0.417565	0.356469	0.313089	0.402338	0.417357	0.37643	0.459455	0.344873	0.297857	0.395135	0.318635	0.266374	0.375897	0.376671	0.320291	0.436601	0.372131	0.329697	0.416633	0.343473	0.293055	0.397685	0.403354	0.352183	0.456719	0.416853	0.36182	0.474038	0.386302	0.322744	0.453986	0.448549	0.386749	0.51198
20	0.391574	0.361226	0.422784	0.361489	0.318806	0.406477	0.423915	0.38375	0.465112	0.350952	0.304635	0.400259	0.323783	0.272266	0.379957	0.383445	0.327937	0.442166	0.377183	0.335434	0.420838	0.34772	0.298098	0.400884	0.409124	0.358832	0.461392	0.424463	0.370421	0.480373	0.393089	0.330526	0.459369	0.456893	0.39632	0.518768
21	0.397445	0.367643	0.428027	0.366539	0.324569	0.410638	0.430501	0.391114	0.470788	0.35708	0.311487	0.405417	0.328973	0.278227	0.384049	0.390263	0.335663	0.447759	0.382262	0.341211	0.425065	0.351991	0.303181	0.404102	0.414919	0.365526	0.466083	0.432109	0.379091	0.486729	0.399918	0.338387	0.464777	0.465261	0.405955	0.525567
22	0.403345	0.3741	0.433295	0.371619	0.330377	0.414821	0.437112	0.398516	0.476484	0.363255	0.31841	0.41061	0.334205	0.284254	0.388173	0.397125	0.343463	0.453382	0.387366	0.347027	0.429312	0.356287	0.308303	0.40734	0.420737	0.372259	0.470793	0.439787	0.387822	0.493107	0.406786	0.346323	0.470211	0.473649	0.415643	0.532375
23	0.409274	0.380593	0.438586	0.376728	0.336227	0.419027	0.443744	0.405953	0.482198	0.369475	0.325401	0.415839	0.339478	0.290345	0.392329	0.404028	0.351332	0.459034	0.392496	0.35288	0.43358	0.360605	0.313462	0.410599	0.426578	0.37903	0.475522	0.447495	0.396609	0.499504	0.41369	0.354329	0.47567	0.482052	0.425377	0.539192
24	0.415229	0.387121	0.443901	0.381864	0.342118	0.423256	0.450397	0.413421	0.48793	0.375739	0.332456	0.421102	0.344792	0.296496	0.39652	0.410968	0.359266	0.464715	0.397649	0.358766	0.437869	0.364947	0.318654	0.413879	0.432439	0.385835	0.48027	0.455228	0.405445	0.505922	0.420629	0.362398	0.481155	0.490465	0.435148	0.546017
25	0.421209	0.393679	0.449238	0.387026	0.348047	0.427509	0.457068	0.420914	0.49368	0.382045	0.33957	0.426401	0.350144	0.302705	0.400746	0.417945	0.367259	0.470425	0.402825	0.364683	0.44218	0.36931	0.32388	0.417181	0.438319	0.392669	0.485037	0.462982	0.414322	0.512358	0.427599	0.370526	0.486666	0.498884	0.444944	0.552849
26	0.427213	0.400266	0.454598	0.392214	0.354011	0.431785	0.463754	0.428429	0.499447	0.38839	0.34674	0.431737	0.355535	0.308967	0.405008	0.424954	0.375305	0.476166	0.408023	0.37063	0.446512	0.373695	0.329135	0.420506	0.444216	0.399529	0.489824	0.470754	0.423232	0.518813	0.434598	0.378706	0.492203	0.507303	0.454757	0.559687
27	0.433237	0.406878	0.45998	0.397427	0.360007	0.436086	0.470453	0.435961	0.50523	0.394774	0.353961	0.437109	0.360962	0.315278	0.409309	0.431994	0.383397	0.481936	0.413241	0.376602	0.450867	0.378101	0.334418	0.423856	0.450129	0.406412	0.494631	0.478541	0.432168	0.525287	0.441623	0.386931	0.497768	0.515718	0.464577	0.566531
28	0.439282	0.413511	0.465385	0.402663	0.366033	0.440412	0.477163	0.443504	0.511031	0.401194	0.361227	0.442519	0.366425	0.321636	0.413649	0.439061	0.39153	0.487737	0.418479	0.382597	0.455245	0.382527	0.339725	0.427231	0.456056	0.413311	0.499459	0.486338	0.441122	0.531779	0.448672	0.395196	0.503361	0.524124	0.474393	0.57338
29	0.445345	0.420162	0.470811	0.407921	0.372085	0.444764	0.483881	0.451054	0.516849	0.407648	0.368534	0.447968	0.371923	0.328034	0.418031	0.446153	0.399697	0.49357	0.423736	0.388613	0.459647	0.386972	0.345055	0.430633	0.461996	0.420224	0.504309	0.494142	0.450085	0.538289	0.455741	0.403491	0.508983	0.532516	0.484195	0.580235
30	0.451423	0.426827	0.47626	0.413201	0.378159	0.449143	0.490605	0.458605	0.522683	0.414134	0.375876	0.453457	0.377454	0.334469	0.422457	0.453267	0.40789	0.499435	0.429009	0.394645	0.464072	0.391436	0.350404	0.434063	0.467947	0.427146	0.509181	0.501948	0.459049	0.544819	0.462828	0.411811	0.514635	0.54089	0.493971	0.587095
31	0.457517	0.433503	0.48173	0.4185	0.384254	0.45355	0.497333	0.466151	0.528535	0.42065	0.383247	0.458986	0.383018	0.340935	0.426929	0.4604	0.416102	0.505334	0.434299	0.40069	0.468523	0.395919	0.355769	0.437522	0.473906	0.434071	0.514077	0.509754	0.468005	0.551367	0.46993	0.420147	0.520319	0.549241	0.503711	0.593961
32	0.463623	0.440186	0.487222	0.423818	0.390364	0.457986	0.504061	0.473688	0.534404	0.427193	0.39064	0.464559	0.388611	0.347427	0.43145	0.46755	0.424325	0.511267	0.439604	0.406746	0.473001	0.400419	0.361147	0.441014	0.479874	0.440995	0.518997	0.517555	0.476943	0.557935	0.477045	0.428491	0.526036	0.557564	0.513405	0.600832
33	0.46974	0.446871	0.492737	0.429154	0.396485	0.462452	0.510788	0.48121	0.540291	0.433762	0.398051	0.470175	0.394235	0.353939	0.436023	0.474713	0.432552	0.517237	0.444923	0.412808	0.477505	0.404936	0.366533	0.444539	0.485846	0.447913	0.523943	0.525347	0.485855	0.564524	0.484168	0.436834	0.531788	0.565855	0.52304	0.607711
34	0.475867	0.453556	0.498274	0.434507	0.402615	0.46695	0.517511	0.48871	0.546196	0.440355	0.405471	0.475838	0.399887	0.360464	0.44065	0.481886	0.440774	0.523245	0.450254	0.418872	0.482038	0.40947	0.371925	0.4481	0.491823	0.45482	0.528917	0.533127	0.494732	0.571134	0.491298	0.445169	0.537577	0.57411	0.532605	0.614596
35	0.482	0.460234	0.503834	0.439875	0.408748	0.471482	0.524227	0.496183	0.55212	0.446969	0.412894	0.481549	0.405565	0.366996	0.445336	0.489067	0.448982	0.529292	0.455597	0.424934	0.486601	0.414018	0.377317	0.4517	0.497803	0.461709	0.533919	0.540891	0.503562	0.577766	0.498432	0.453485	0.543405	0.582323	0.542091	0.621489
36	0.488139	0.466903	0.509418	0.445256	0.414879	0.476048	0.530935	0.503623	0.558064	0.453601	0.420311	0.487311	0.411269	0.373527	0.450084	0.496252	0.457168	0.535382	0.46095	0.430991	0.491195	0.418582	0.382706	0.45534	0.503783	0.468576	0.538952	0.548635	0.512338	0.584421	0.505567	0.461773	0.549275	0.590491	0.551484	0.628391
37	0.494282	0.473557	0.515025	0.450651	0.421005	0.480652	0.537632	0.511024	0.564028	0.46025	0.427717	0.493126	0.416997	0.380052	0.454898	0.503439	0.465322	0.541515	0.466312	0.437037	0.495822	0.423159	0.388086	0.459023	0.509761	0.475414	0.544017	0.556355	0.521049	0.591101	0.512699	0.470025	0.555188	0.59861	0.560776	0.635304
38	0.500426	0.480193	0.520658	0.456058	0.427119	0.485296	0.544315	0.518379	0.570013	0.466913	0.435102	0.498996	0.422747	0.386561	0.459782	0.510624	0.473435	0.547696	0.471682	0.443069	0.500483	0.427749	0.393454	0.462754	0.515737	0.482218	0.549116	0.564049	0.529686	0.597807	0.519826	0.478229	0.561149	0.606674	0.569954	0.642227
39	0.50657	0.486804	0.526315	0.461474	0.433218	0.489981	0.550982	0.525682	0.576021	0.473588	0.442458	0.504925	0.428518	0.393046	0.46474	0.517805	0.481498	0.553925	0.477059	0.449081	0.505181	0.432352	0.398804	0.466533	0.521709	0.488981	0.554251	0.571711	0.538239	0.60454	0.526944	0.486377	0.567159	0.614681	0.579009	0.649162
40	0.512712	0.493388	0.531999	0.4669	0.439294	0.49471	0.557631	0.532929	0.582052	0.480273	0.449779	0.510915	0.434309	0.399501	0.469777	0.524978	0.489502	0.560205	0.482441	0.45507	0.509917	0.436967	0.40413	0.470367	0.527674	0.495698	0.559425	0.57934	0.5467	0.611301	0.534052	0.494458	0.573222	0.622626	0.587931	0.656109
41	0.51885	0.499938	0.537709	0.472334	0.445344	0.499487	0.56426	0.540111	0.588107	0.486964	0.457054	0.516968	0.440118	0.405915	0.474898	0.532142	0.497437	0.566539	0.487827	0.461029	0.514694	0.441593	0.409427	0.474256	0.533632	0.502362	0.564639	0.586931	0.555058	0.618091	0.541146	0.502463	0.57934	0.630506	0.596711	0.663068
42	0.524983	0.506451	0.543446	0.477774	0.451361	0.504312	0.570865	0.547225	0.594187	0.493661	0.464278	0.523087	0.445943	0.412282	0.480106	0.539292	0.505294	0.572928	0.493215	0.466955	0.519513	0.446229	0.414691	0.478206	0.539579	0.508968	0.569896	0.594481	0.563307	0.624911	0.548224	0.510382	0.585516	0.638317	0.60534	0.67004
43	0.531108	0.512922	0.549212	0.48322	0.45734	0.50919	0.577446	0.554264	0.600291	0.500359	0.471441	0.529275	0.451783	0.418594	0.485406	0.546426	0.513065	0.579375	0.498606	0.472842	0.524376	0.450874	0.419914	0.48222	0.545516	0.515509	0.575196	0.601986	0.571438	0.63176	0.555282	0.518206	0.591752	0.646055	0.613811	0.677024
44	0.537224	0.519347	0.555005	0.48867	0.463275	0.514123	0.583998	0.561224	0.60642	0.507057	0.478537	0.535532	0.457636	0.424841	0.490802	0.553541	0.520742	0.58588	0.503996	0.478686	0.529286	0.455528	0.425091	0.486301	0.55144	0.52198	0.580543	0.609443	0.579444	0.638638	0.562318	0.525926	0.598051	0.653718	0.622119	0.684017
45	0.543328	0.525722	0.560827	0.494122	0.46916	0.519113	0.590522	0.568099	0.612574	0.513753	0.485559	0.541861	0.463501	0.431019	0.496297	0.560634	0.528317	0.592444	0.509386	0.484482	0.534243	0.460189	0.430217	0.490453	0.557349	0.528376	0.585937	0.61685	0.58732	0.645543	0.569328	0.533534	0.604413	0.661302	0.630257	0.691018
46	0.54942	0.532042	0.566678	0.499576	0.474991	0.524162	0.597014	0.574887	0.618753	0.520444	0.4925	0.548261	0.469376	0.437119	0.501892	0.567702	0.535784	0.599068	0.514773	0.490225	0.53925	0.464858	0.435286	0.494679	0.563242	0.534691	0.591379	0.624203	0.59506	0.652474	0.576312	0.541023	0.610838	0.668804	0.638222	0.698024
47	0.555497	0.538306	0.572556	0.505029	0.480762	0.529273	0.603471	0.581583	0.624953	0.527128	0.499357	0.554732	0.47526	0.443136	0.50759	0.574743	0.543137	0.605749	0.520157	0.495912	0.544308	0.469533	0.440294	0.498982	0.569117	0.540922	0.596871	0.631499	0.602661	0.659428	0.583264	0.548388	0.617327	0.676221	0.646011	0.705029
48	0.561557	0.544508	0.578461	0.510482	0.48647	0.534446	0.609893	0.588185	0.631175	0.533802	0.506125	0.561272	0.481151	0.449067	0.513391	0.581754	0.550373	0.612487	0.525537	0.501539	0.549417	0.474213	0.445235	0.503365	0.574973	0.547065	0.602411	0.638736	0.61012	0.6664	0.590184	0.555622	0.623878	0.68355	0.653625	0.71203
49	0.567599	0.550649	0.584392	0.515932	0.492109	0.539683	0.616278	0.594691	0.637415	0.540463	0.5128	0.56788	0.487047	0.454906	0.519294	0.588732	0.557486	0.619277	0.53091	0.507102	0.554578	0.478897	0.450106	0.507829	0.580807	0.553116	0.607999	0.64591	0.617437	0.673385	0.597068	0.562722	0.630489	0.69079	0.661062	0.719018
50	0.573621	0.556724	0.590347	0.521378	0.497677	0.544984	0.622622	0.6011	0.643671	0.547111	0.51938	0.574552	0.492946	0.460654	0.525297	0.595674	0.564477	0.626117	0.536276	0.512599	0.559791	0.483586	0.454904	0.512376	0.58662	0.559074	0.613634	0.653019	0.62461	0.680379	0.603915	0.569687	0.637154	0.697937	0.668326	0.725989
51	0.579621	0.562733	0.596324	0.52682	0.503171	0.550349	0.628925	0.607411	0.649938	0.553741	0.525865	0.581283	0.498847	0.466307	0.531398	0.602578	0.571343	0.632999	0.541634	0.518028	0.565056	0.488277	0.459625	0.517006	0.592408	0.564936	0.619314	0.66006	0.63164	0.687373	0.610721	0.576514	0.643871	0.704989	0.675417	0.732933
52	0.585598	0.568676	0.60232	0.532254	0.50859	0.555775	0.635184	0.613625	0.656213	0.560353	0.532255	0.588069	0.504749	0.471866	0.537591	0.609442	0.578085	0.63992	0.546983	0.523387	0.57037	0.49297	0.464268	0.521719	0.598171	0.570703	0.625036	0.667032	0.63853	0.694362	0.617483	0.583205	0.650632	0.711945	0.682341	0.739842
53	0.591549	0.574551	0.608331	0.537682	0.513932	0.561261	0.641397	0.619743	0.66249	0.566943	0.538551	0.594902	0.51065	0.477334	0.543871	0.616263	0.584705	0.64687	0.55232	0.528675	0.575731	0.497665	0.468832	0.526513	0.603906	0.576374	0.630796	0.673931	0.645282	0.701337	0.624201	0.589761	0.65743	0.718802	0.689101	0.746709
54	0.597474	0.580359	0.614355	0.5431	0.519198	0.566805	0.647564	0.625765	0.668765	0.57351	0.544753	0.601777	0.516547	0.48271	0.550233	0.623038	0.591205	0.653843	0.557646	0.533892	0.581139	0.50236	0.473316	0.531387	0.609614	0.58195	0.63659	0.680755	0.6519	0.708289	0.630871	0.596184	0.664258	0.725559	0.695703	0.753524
55	0.603371	0.5861	0.620388	0.548508	0.524389	0.572402	0.653681	0.631693	0.675032	0.58005	0.550865	0.608686	0.52244	0.487999	0.556668	0.629765	0.597587	0.660831	0.562958	0.539038	0.586588	0.507054	0.477723	0.536337	0.615291	0.587433	0.642413	0.687503	0.658386	0.715212	0.637492	0.602477	0.671106	0.732214	0.702152	0.760278
56	0.609237	0.591775	0.626425	0.553905	0.529505	0.578048	0.659749	0.63753	0.681286	0.586563	0.55689	0.615621	0.528326	0.493204	0.56317	0.636443	0.603855	0.667824	0.568256	0.544115	0.592076	0.511747	0.482052	0.54136	0.620937	0.592825	0.648261	0.694173	0.664746	0.722096	0.644061	0.608646	0.677967	0.738766	0.708452	0.766964
57	0.615073	0.597385	0.632461	0.559289	0.534548	0.583738	0.665764	0.643278	0.687521	0.593046	0.562829	0.622574	0.534205	0.498329	0.569731	0.643068	0.610013	0.674814	0.573538	0.549124	0.597599	0.516439	0.486307	0.546451	0.626551	0.598127	0.654127	0.700762	0.670983	0.728934	0.650576	0.614693	0.68483	0.745213	0.714611	0.773574
58	0.620875	0.602931	0.638494	0.564659	0.539521	0.589469	0.671726	0.648939	0.693732	0.599496	0.568687	0.629538	0.540074	0.503377	0.576342	0.649639	0.616066	0.681793	0.578803	0.554065	0.603152	0.521127	0.490489	0.551607	0.632131	0.603343	0.660006	0.707268	0.677102	0.735716	0.657035	0.620625	0.691687	0.751555	0.720632	0.780099
59	0.626643	0.608416	0.644517	0.570014	0.544426	0.595233	0.677633	0.654516	0.699912	0.605912	0.574467	0.636504	0.545932	0.508353	0.582996	0.656154	0.622016	0.68875	0.584051	0.558942	0.608731	0.525812	0.494602	0.556821	0.637675	0.608477	0.665892	0.713692	0.683107	0.742437	0.663437	0.626446	0.698528	0.75779	0.726522	0.786532
60	0.632375	0.613839	0.650528	0.575352	0.549267	0.601025	0.683484	0.660012	0.706058	0.612292	0.580172	0.643464	0.551778	0.513261	0.589683	0.66261	0.627869	0.695679	0.58928	0.563757	0.614331	0.530492	0.498648	0.562089	0.643183	0.61353	0.671778	0.72003	0.689002	0.749089	0.669779	0.63216	0.705344	0.763917	0.732286	0.792869
61	0.63807	0.619204	0.65652	0.580674	0.554045	0.60684	0.689277	0.665428	0.712162	0.618633	0.585806	0.650412	0.557609	0.518106	0.596397	0.669006	0.633629	0.702571	0.594488	0.568512	0.619947	0.535166	0.502632	0.567404	0.648654	0.618507	0.67766	0.726281	0.694791	0.755665	0.67606	0.637774	0.712127	0.769937	0.737927	0.799101
62	0.643727	0.62451	0.662491	0.585976	0.558765	0.612673	0.695012	0.670768	0.718221	0.624935	0.591371	0.657339	0.563424	0.52289	0.603129	0.675341	0.639299	0.709418	0.599676	0.573209	0.625574	0.539835	0.506557	0.572761	0.654086	0.623411	0.683531	0.732445	0.700478	0.762158	0.682279	0.643291	0.718867	0.775848	0.743452	0.805225
63	0.649343	0.62976	0.668436	0.591259	0.563428	0.618516	0.700687	0.676033	0.72423	0.631194	0.59687	0.66424	0.569222	0.527618	0.609872	0.681612	0.644883	0.716213	0.604841	0.577851	0.631207	0.544496	0.510426	0.578155	0.659478	0.628244	0.689385	0.73852	0.706066	0.768565	0.688433	0.648716	0.725558	0.781651	0.748863	0.811237
64	0.654919	0.634955	0.674351	0.59652	0.568038	0.624366	0.706301	0.681225	0.730185	0.637409	0.602306	0.671106	0.575001	0.532294	0.616618	0.687818	0.650385	0.72295	0.609983	0.58244	0.636842	0.54915	0.514243	0.58358	0.664829	0.63301	0.695217	0.744505	0.711559	0.774879	0.694521	0.654054	0.732192	0.787344	0.754165	0.817131
65	0.660452	0.640096	0.680232	0.60176	0.572598	0.630216	0.711852	0.686347	0.736081	0.643579	0.607682	0.677933	0.58076	0.53692	0.623361	0.693957	0.655808	0.729621	0.6151	0.586978	0.642474	0.553795	0.518011	0.589031	0.670138	0.637711	0.701022	0.7504	0.716959	0.781096	0.700542	0.659308	0.738763	0.792928	0.759362	0.822905
66	0.665942	0.645185	0.686076	0.606976	0.57711	0.636062	0.717341	0.691401	0.741915	0.649702	0.612999	0.684714	0.586497	0.541499	0.630095	0.700028	0.661154	0.736222	0.620192	0.591468	0.648099	0.558431	0.521733	0.594501	0.675403	0.642351	0.706795	0.756203	0.722268	0.787212	0.706494	0.664481	0.745263	0.798404	0.764456	0.828556
67	0.671387	0.650221	0.691879	0.612168	0.581577	0.641899	0.722766	0.696387	0.747684	0.655775	0.618259	0.691444	0.59221	0.546035	0.636812	0.70603	0.666426	0.742747	0.625258	0.595912	0.653712	0.563057	0.525413	0.599988	0.680625	0.646932	0.712532	0.761913	0.727491	0.793224	0.712377	0.669578	0.751688	0.80377	0.769451	0.834082
68	0.676787	0.655208	0.697638	0.617334	0.586	0.647723	0.728127	0.701308	0.753384	0.661798	0.623466	0.698118	0.597899	0.55053	0.643508	0.711961	0.671627	0.749191	0.630297	0.600312	0.659309	0.567671	0.529053	0.605485	0.685802	0.651456	0.718228	0.767532	0.732628	0.799128	0.718188	0.674601	0.758032	0.809028	0.774349	0.839482
69	0.68214	0.660144	0.703351	0.622475	0.590382	0.653528	0.733422	0.706165	0.759013	0.66777	0.628619	0.704732	0.603561	0.554985	0.650177	0.71782	0.676759	0.755549	0.635307	0.60467	0.664886	0.572274	0.532655	0.610988	0.690933	0.655926	0.723879	0.773057	0.737683	0.804922	0.723928	0.679552	0.764291	0.814177	0.779153	0.844753
70	0.687445	0.665031	0.709015	0.627588	0.594725	0.659312	0.738651	0.710959	0.764567	0.673687	0.63372	0.71128	0.609195	0.559403	0.656813	0.723606	0.681824	0.761819	0.640288	0.608986	0.670441	0.576865	0.536223	0.616493	0.696018	0.660343	0.729481	0.778489	0.742656	0.810605	0.729595	0.684435	0.77046	0.819218	0.783865	0.849896
71	0.692701	0.669869	0.714627	0.632672	0.59903	0.66507	0.743813	0.715692	0.770046	0.67955	0.638771	0.71776	0.614801	0.563786	0.663412	0.729319	0.686824	0.767996	0.64524	0.613263	0.675969	0.581442	0.539758	0.621995	0.701055	0.664709	0.735032	0.783827	0.747549	0.816173	0.735188	0.689252	0.776536	0.824153	0.788487	0.85491
72	0.697908	0.67466	0.720184	0.637727	0.603298	0.670799	0.748908	0.720363	0.775446	0.685357	0.643773	0.724167	0.620377	0.568135	0.669969	0.734956	0.691759	0.774077	0.65016	0.617503	0.681467	0.586005	0.543262	0.627492	0.706044	0.669025	0.740528	0.789071	0.752365	0.821626	0.740707	0.694004	0.782516	0.82898	0.793022	0.859796
73	0.703064	0.679403	0.725685	0.642752	0.607531	0.676495	0.753935	0.724975	0.780767	0.691106	0.648726	0.730497	0.62592	0.572452	0.676481	0.740518	0.696633	0.78006	0.655048	0.621705	0.686932	0.590554	0.546737	0.632979	0.710984	0.673294	0.745966	0.794221	0.757104	0.826964	0.74615	0.698694	0.788396	0.833702	0.797472	0.864552
74	0.70817	0.684099	0.731128	0.647746	0.611731	0.682155	0.758893	0.729528	0.786005	0.696797	0.653631	0.736749	0.631431	0.576738	0.682942	0.746004	0.701445	0.785942	0.659904	0.625872	0.692362	0.595087	0.550185	0.638452	0.715874	0.677517	0.751343	0.799278	0.761768	0.832184	0.751518	0.703322	0.794175	0.838319	0.801837	0.86918
75	0.713223	0.688748	0.73651	0.652707	0.615898	0.687777	0.763784	0.734023	0.791161	0.702428	0.65849	0.74292	0.636908	0.580994	0.68935	0.751412	0.706197	0.791721	0.664727	0.630005	0.697753	0.599604	0.553608	0.643909	0.720714	0.681694	0.756658	0.804241	0.766358	0.837286	0.756809	0.707891	0.79985	0.842832	0.80612	0.873681
76	0.718224	0.693351	0.741831	0.657636	0.620033	0.693358	0.768605	0.73846	0.796234	0.707998	0.663302	0.749006	0.64235	0.585221	0.695701	0.756743	0.710891	0.797396	0.669515	0.634104	0.703104	0.604104	0.557006	0.649347	0.725503	0.685828	0.761908	0.809111	0.770875	0.842272	0.762023	0.712402	0.80542	0.847242	0.810323	0.878057
77	0.723171	0.697907	0.747088	0.662531	0.624137	0.698895	0.773357	0.742841	0.801221	0.713507	0.668069	0.755006	0.647755	0.589419	0.701992	0.761996	0.715526	0.802966	0.674269	0.638169	0.708412	0.608587	0.560381	0.654763	0.730241	0.689918	0.767091	0.813887	0.77532	0.84714	0.767159	0.716856	0.810883	0.85155	0.814446	0.882307
78	0.728064	0.702418	0.75228	0.667391	0.62821	0.704386	0.778039	0.747165	0.806122	0.718953	0.67279	0.760917	0.653122	0.59359	0.70822	0.76717	0.720104	0.808428	0.678987	0.642203	0.713675	0.613051	0.563735	0.660153	0.734927	0.693965	0.772206	0.818571	0.779695	0.851891	0.772218	0.721255	0.816237	0.855757	0.818491	0.886434
79	0.732903	0.706883	0.757406	0.672216	0.632254	0.709828	0.782652	0.751433	0.810937	0.724335	0.677466	0.766738	0.658451	0.597735	0.714382	0.772266	0.724626	0.813782	0.683668	0.646205	0.71889	0.617496	0.567067	0.665517	0.739561	0.697972	0.77725	0.823163	0.784	0.856525	0.777199	0.725598	0.821483	0.859865	0.822459	0.890439
80	0.737687	0.711302	0.762466	0.677004	0.636268	0.71522	0.787196	0.755646	0.815666	0.729653	0.682097	0.772468	0.66374	0.601853	0.720476	0.777282	0.729091	0.819028	0.688313	0.650176	0.724057	0.621922	0.570379	0.67085	0.744141	0.701937	0.782224	0.827663	0.788236	0.861043	0.782101	0.729887	0.82662	0.863874	0.826352	0.894324
81	0.742415	0.715675	0.767457	0.681756	0.640254	0.720561	0.791669	0.759804	0.820308	0.734906	0.686684	0.778105	0.668989	0.605945	0.726499	0.782219	0.733502	0.824165	0.69292	0.654116	0.729173	0.626328	0.573672	0.676151	0.748669	0.705862	0.787125	0.832071	0.792403	0.865447	0.786926	0.734123	0.831647	0.867786	0.830172	0.898092
82	0.747087	0.720003	0.772379	0.686471	0.644211	0.725847	0.796074	0.763907	0.824862	0.740093	0.691226	0.783647	0.674195	0.610012	0.732449	0.787076	0.737858	0.829193	0.697489	0.658026	0.734237	0.630713	0.576947	0.681418	0.753143	0.709748	0.791952	0.83639	0.796504	0.869736	0.791671	0.738306	0.836564	0.871602	0.833918	0.901744
83	0.751703	0.724286	0.777231	0.691147	0.64814	0.731078	0.800408	0.767957	0.829329	0.745214	0.695724	0.789095	0.679359	0.614053	0.738324	0.791854	0.742159	0.834112	0.702019	0.661906	0.739248	0.635076	0.580203	0.686649	0.757563	0.713595	0.796705	0.840618	0.800538	0.873913	0.796339	0.742437	0.841371	0.875324	0.837592	0.905282
84	0.756262	0.728524	0.782013	0.695784	0.652042	0.736252	0.804673	0.771953	0.833709	0.750268	0.700179	0.794447	0.68448	0.61807	0.744123	0.796553	0.746407	0.838922	0.70651	0.665757	0.744204	0.639417	0.583443	0.691843	0.761929	0.717403	0.801382	0.844757	0.804506	0.877978	0.800928	0.746517	0.846068	0.878954	0.841195	0.908708
85	0.760763	0.732716	0.786725	0.700382	0.655916	0.741368	0.808868	0.775896	0.838002	0.755255	0.704589	0.799702	0.689556	0.622062	0.749843	0.801172	0.750602	0.843624	0.710961	0.669578	0.749103	0.643736	0.586665	0.696996	0.766241	0.721173	0.805984	0.848809	0.808409	0.881934	0.80544	0.750547	0.850656	0.882491	0.844729	0.912026
86	0.765208	0.736863	0.791364	0.70494	0.659762	0.746425	0.812995	0.779785	0.842209	0.760174	0.708955	0.804861	0.694587	0.62603	0.755484	0.805712	0.754744	0.848218	0.715372	0.673371	0.753946	0.648031	0.589871	0.702108	0.770498	0.724905	0.81051	0.852773	0.812248	0.885781	0.809873	0.754526	0.855136	0.885939	0.848194	0.915237
87	0.769595	0.740965	0.795933	0.709457	0.663582	0.751421	0.817052	0.783623	0.846329	0.765025	0.713278	0.809922	0.699572	0.629974	0.761044	0.810172	0.758833	0.852704	0.719742	0.677134	0.758731	0.652302	0.593061	0.707177	0.7747	0.728599	0.814959	0.85665	0.816022	0.889521	0.814228	0.758456	0.859508	0.889298	0.851592	0.918343
88	0.773924	0.745021	0.800429	0.713933	0.667374	0.756355	0.821041	0.787408	0.850364	0.769808	0.717557	0.814886	0.70451	0.633893	0.766522	0.814554	0.76287	0.857084	0.724071	0.680869	0.763456	0.656549	0.596236	0.712202	0.778848	0.732257	0.819332	0.860442	0.819734	0.893156	0.818506	0.762336	0.863774	0.892571	0.854923	0.921347
89	0.778196	0.749033	0.804852	0.718368	0.671139	0.761227	0.824961	0.791141	0.854313	0.774521	0.721792	0.819753	0.7094	0.637789	0.771917	0.818857	0.766855	0.861358	0.728358	0.684576	0.768122	0.660772	0.599395	0.717182	0.78294	0.735877	0.823628	0.86415	0.823384	0.896687	0.822707	0.766167	0.867933	0.895757	0.858189	0.924252
90	0.782409	0.752999	0.809204	0.722761	0.674878	0.766036	0.828814	0.794822	0.858178	0.779167	0.725983	0.824523	0.714243	0.64166	0.777228	0.823082	0.770789	0.865527	0.732603	0.688254	0.772727	0.664968	0.602539	0.722114	0.786978	0.739461	0.827847	0.867775	0.826972	0.900118	0.826832	0.76995	0.871987	0.898861	0.86139	0.92706
91	0.786564	0.756921	0.813483	0.727111	0.678589	0.770781	0.832598	0.798453	0.861959	0.783743	0.730131	0.829195	0.719037	0.645508	0.782454	0.82723	0.774671	0.869593	0.736806	0.691903	0.777271	0.669139	0.605668	0.726999	0.790961	0.743008	0.831988	0.871317	0.830499	0.903448	0.83088	0.773685	0.875938	0.901881	0.864527	0.929773
92	0.790661	0.760798	0.81769	0.731418	0.682274	0.775462	0.836316	0.802032	0.865657	0.78825	0.734235	0.833772	0.723781	0.649331	0.787596	0.8313	0.778503	0.873556	0.740966	0.695524	0.781754	0.673284	0.608783	0.731834	0.794888	0.74652	0.836054	0.874778	0.833965	0.906681	0.834852	0.777372	0.879786	0.904822	0.867602	0.932393
93	0.7947	0.764629	0.821825	0.735682	0.685932	0.780077	0.839967	0.805561	0.869273	0.792687	0.738295	0.838252	0.728476	0.65313	0.792651	0.835293	0.782284	0.877418	0.745083	0.699118	0.786175	0.677401	0.611883	0.73662	0.79876	0.749995	0.840042	0.878158	0.837372	0.909817	0.838749	0.781012	0.883534	0.907683	0.870615	0.934925
94	0.798681	0.768416	0.825887	0.739902	0.689564	0.784627	0.843552	0.80904	0.872807	0.797056	0.742312	0.842636	0.73312	0.656906	0.79762	0.83921	0.786014	0.881181	0.749157	0.702683	0.790533	0.681491	0.614969	0.741354	0.802578	0.753435	0.843955	0.88146	0.84072	0.91286	0.842572	0.784605	0.887182	0.910466	0.873567	0.937369
95	0.802604	0.772158	0.829878	0.744079	0.693168	0.789112	0.847071	0.812468	0.876261	0.801356	0.746285	0.846925	0.737714	0.660657	0.802503	0.843051	0.789695	0.884845	0.753187	0.70622	0.794828	0.685554	0.618041	0.746037	0.80634	0.756839	0.847792	0.884685	0.84401	0.915811	0.84632	0.788151	0.890732	0.913174	0.876459	0.939728
96	0.806469	0.775855	0.833797	0.748211	0.696746	0.793529	0.850525	0.815847	0.879636	0.805587	0.750215	0.85112	0.742256	0.664384	0.8073	0.846818	0.793326	0.888412	0.757174	0.709728	0.79906	0.689588	0.621098	0.750667	0.810048	0.760207	0.851553	0.887832	0.847241	0.918673	0.849996	0.791651	0.894186	0.915807	0.879293	0.942004
97	0.810276	0.779508	0.837645	0.752298	0.700297	0.797881	0.853914	0.819177	0.882932	0.809749	0.754101	0.855222	0.746746	0.668087	0.81201	0.85051	0.796908	0.891884	0.761116	0.713209	0.803229	0.693593	0.624142	0.755244	0.813702	0.763541	0.855239	0.890905	0.850416	0.921446	0.853598	0.795105	0.897545	0.918368	0.882068	0.944201
98	0.814026	0.783116	0.841422	0.756341	0.703821	0.802166	0.85724	0.822459	0.886151	0.813843	0.757944	0.859231	0.751185	0.671766	0.816633	0.854128	0.80044	0.895262	0.765015	0.716662	0.807335	0.69757	0.627172	0.759767	0.817301	0.766839	0.858851	0.893903	0.853534	0.924134	0.857129	0.798513	0.90081	0.920857	0.884787	0.94632
99	0.817718	0.78668	0.845129	0.760339	0.707318	0.806384	0.860502	0.825691	0.889293	0.817869	0.761743	0.863148	0.755571	0.67542	0.82117	0.857673	0.803924	0.898548	0.768869	0.720086	0.811377	0.701517	0.630188	0.764235	0.820845	0.770102	0.862389	0.896828	0.856596	0.926738	0.860588	0.801876	0.903985	0.923277	0.887449	0.948364
100	0.821353	0.7902	0.848765	0.764292	0.710789	0.810535	0.863701	0.828876	0.89236	0.821826	0.765499	0.866975	0.759905	0.67905	0.825621	0.861147	0.807359	0.901744	0.772679	0.723483	0.815356	0.705435	0.633191	0.768649	0.824336	0.773331	0.865854	0.899682	0.859604	0.929261	0.863977	0.805193	0.907069	0.925629	0.890056	0.950335

## Sheet: AD
	BELGIUM									BRUSSELS									FLANDERS									WALLONIA
	Both			Male			Female			Both			Male			Female			Both			Male			Female			Both			Male			Female
Age	mean	lwr	upr	mean	lwr	upr	mean	lwr	upr	mean	lwr	upr	mean	lwr	upr	mean	lwr	upr	mean	lwr	upr	mean	lwr	upr	mean	lwr	upr	mean	lwr	upr	mean	lwr	upr	mean	lwr	upr
ALL	0.314221	0.299682	0.329133	0.248625	0.2291	0.269234	0.375754	0.355842	0.396095	0.393186	0.366914	0.420091	0.33205	0.296325	0.369818	0.450108	0.41404	0.486707	0.227259	0.209119	0.246482	0.182131	0.158978	0.207823	0.270275	0.244779	0.29738	0.44949	0.421825	0.477471	0.348085	0.308586	0.389789	0.542095	0.50524	0.578495
15	0.242499	0.197912	0.293456	0.159312	0.109791	0.225511	0.330321	0.26276	0.405694	0.327243	0.239384	0.429154	0.234822	0.154843	0.339516	0.420711	0.307177	0.543302	0.193223	0.142461	0.25666	0.131663	0.0842714	0.199888	0.259264	0.186889	0.347682	0.290475	0.215395	0.379083	0.180263	0.110681	0.279826	0.405912	0.30116	0.519989
16	0.2473	0.204543	0.295672	0.165791	0.117006	0.229626	0.332354	0.268344	0.403218	0.331596	0.248268	0.427006	0.242015	0.164384	0.341332	0.421479	0.314469	0.53641	0.195321	0.146922	0.2549	0.135573	0.0892148	0.200712	0.258747	0.19032	0.341403	0.301046	0.228533	0.385082	0.191134	0.12133	0.287939	0.414486	0.31478	0.521726
17	0.25215	0.211265	0.297957	0.172459	0.124563	0.233853	0.33439	0.273912	0.40085	0.335967	0.257295	0.42493	0.249335	0.1743	0.343243	0.422248	0.321754	0.529621	0.19743	0.151441	0.253218	0.139568	0.0943585	0.201616	0.258235	0.19372	0.3353	0.311803	0.242125	0.391183	0.202466	0.132756	0.296274	0.423091	0.328589	0.523578
18	0.257036	0.218048	0.300318	0.179295	0.132432	0.238189	0.336427	0.279432	0.398617	0.340342	0.266424	0.422944	0.256754	0.184541	0.345261	0.42302	0.32899	0.522978	0.199545	0.155995	0.251629	0.143635	0.0996795	0.202612	0.257731	0.197067	0.329409	0.322708	0.2561	0.397386	0.214221	0.144934	0.304824	0.431704	0.342504	0.525565
19	0.261943	0.224853	0.302761	0.186277	0.140578	0.242636	0.338462	0.28487	0.396546	0.344708	0.275602	0.42107	0.264247	0.195047	0.347401	0.423795	0.336134	0.51653	0.20166	0.160556	0.25015	0.147761	0.105148	0.203712	0.25724	0.200333	0.323766	0.333719	0.270374	0.403693	0.226357	0.157813	0.313586	0.440298	0.356435	0.527712
20	0.266855	0.231639	0.305297	0.193376	0.148956	0.247196	0.340492	0.290188	0.394668	0.349053	0.284774	0.419335	0.271782	0.205746	0.349682	0.424575	0.343135	0.510327	0.203768	0.165092	0.248804	0.15193	0.110728	0.20493	0.256764	0.203488	0.318412	0.344791	0.28485	0.410112	0.23882	0.171326	0.322555	0.448847	0.370282	0.530049
21	0.271755	0.238361	0.307936	0.200564	0.157508	0.251871	0.342514	0.295344	0.393015	0.353363	0.293875	0.417768	0.279329	0.21655	0.352128	0.425361	0.349936	0.504428	0.205863	0.169566	0.247613	0.156126	0.116374	0.206286	0.256308	0.206499	0.313385	0.35588	0.299418	0.416656	0.251552	0.185376	0.331732	0.457325	0.383938	0.532611
22	0.276627	0.24497	0.310691	0.207809	0.166171	0.256669	0.344525	0.300295	0.391624	0.357624	0.302832	0.416409	0.286855	0.22736	0.354771	0.426153	0.356472	0.498896	0.207938	0.173935	0.246604	0.16033	0.122036	0.207798	0.255875	0.209328	0.30873	0.366936	0.313953	0.423343	0.264486	0.199846	0.341119	0.465706	0.397287	0.53544
23	0.281453	0.251416	0.313576	0.215076	0.174869	0.261596	0.346522	0.304992	0.39053	0.361823	0.311559	0.415304	0.294325	0.238061	0.357646	0.426954	0.362672	0.493803	0.209987	0.178153	0.245808	0.164525	0.127653	0.20949	0.255469	0.211935	0.304491	0.377911	0.328317	0.430199	0.277546	0.214593	0.350721	0.473963	0.410207	0.538581
24	0.286215	0.257644	0.316604	0.222326	0.18352	0.266658	0.348502	0.309388	0.38977	0.365945	0.319962	0.414508	0.301704	0.248526	0.360798	0.427764	0.368453	0.489226	0.212002	0.182167	0.245258	0.168689	0.13316	0.211387	0.255095	0.214278	0.300711	0.388756	0.342363	0.437255	0.290656	0.229454	0.360543	0.482073	0.422573	0.542085
25	0.290895	0.263603	0.319784	0.229522	0.192035	0.271864	0.350462	0.31344	0.389378	0.369975	0.327929	0.414091	0.308955	0.258619	0.364273	0.428584	0.373729	0.485251	0.213978	0.185924	0.244991	0.172802	0.138487	0.213512	0.254754	0.216314	0.297433	0.399418	0.355936	0.444547	0.30373	0.244251	0.37059	0.490008	0.434263	0.546002
26	0.295473	0.269247	0.323124	0.236619	0.200321	0.277215	0.352399	0.317108	0.389379	0.373901	0.335341	0.414132	0.31604	0.268201	0.368119	0.429415	0.378411	0.481962	0.215905	0.189368	0.245038	0.17684	0.143564	0.215884	0.254452	0.218009	0.294691	0.40985	0.36888	0.45211	0.316682	0.258798	0.380861	0.497744	0.445161	0.550376
27	0.29993	0.274534	0.326617	0.243576	0.208289	0.282707	0.35431	0.320367	0.389788	0.377707	0.342069	0.414717	0.322921	0.277136	0.372372	0.430258	0.382416	0.47944	0.217778	0.19245	0.245427	0.18078	0.148326	0.218515	0.254192	0.219338	0.29251	0.42	0.381052	0.45997	0.329422	0.272907	0.39134	0.505257	0.455175	0.555233
28	0.304246	0.279436	0.33025	0.250348	0.215855	0.288325	0.356192	0.323208	0.3906	0.381378	0.347995	0.415921	0.329559	0.285308	0.377052	0.431115	0.38568	0.47774	0.219589	0.195135	0.24617	0.184599	0.152714	0.221401	0.253978	0.220291	0.290894	0.429819	0.392332	0.468129	0.341859	0.286409	0.401996	0.512522	0.464243	0.560569
29	0.308403	0.283939	0.333991	0.256887	0.222949	0.294036	0.358042	0.325644	0.39179	0.384901	0.353027	0.417794	0.335915	0.292633	0.382142	0.431986	0.388177	0.476886	0.22133	0.197405	0.24726	0.18827	0.156689	0.224523	0.253812	0.220881	0.289828	0.43926	0.402641	0.476553	0.353902	0.299153	0.41277	0.519518	0.472345	0.566345
30	0.312379	0.288043	0.337796	0.263147	0.229516	0.29979	0.359856	0.327705	0.393315	0.38826	0.357134	0.420326	0.341952	0.299066	0.387586	0.432874	0.38993	0.47685	0.222993	0.199267	0.248667	0.19177	0.160227	0.227837	0.2537	0.221142	0.289272	0.448276	0.411949	0.485163	0.365462	0.311024	0.423569	0.526221	0.479508	0.57248
31	0.316155	0.29176	0.341607	0.269082	0.235521	0.305513	0.361631	0.329442	0.395112	0.391442	0.36035	0.423441	0.347629	0.304612	0.393284	0.433777	0.391012	0.477553	0.224571	0.20075	0.250335	0.19507	0.163325	0.23128	0.253645	0.22113	0.289166	0.456822	0.420275	0.49384	0.37645	0.321945	0.434273	0.53261	0.485798	0.578855
32	0.319711	0.295112	0.345356	0.274642	0.240947	0.311118	0.363365	0.330915	0.397108	0.394431	0.362774	0.426999	0.352908	0.309312	0.399098	0.434699	0.391538	0.478874	0.226057	0.2019	0.252191	0.198146	0.165994	0.234772	0.25365	0.220911	0.289439	0.464854	0.427672	0.502431	0.386782	0.331872	0.444731	0.538664	0.491309	0.585331
33	0.323027	0.298126	0.348973	0.279782	0.245794	0.316497	0.365053	0.332189	0.399225	0.397213	0.364546	0.430823	0.357751	0.313234	0.404866	0.43564	0.39165	0.480667	0.227442	0.202775	0.254153	0.200971	0.168262	0.238218	0.25372	0.220561	0.290008	0.47233	0.434215	0.510771	0.396376	0.340791	0.454772	0.544362	0.496147	0.59176
34	0.326082	0.30083	0.352385	0.284454	0.250069	0.321539	0.366694	0.33333	0.401386	0.399774	0.365809	0.43473	0.362122	0.316456	0.410421	0.4366	0.391493	0.482782	0.228719	0.203433	0.256137	0.203519	0.170158	0.241517	0.253858	0.220155	0.290796	0.47921	0.439982	0.518696	0.405153	0.34871	0.46422	0.549685	0.500418	0.597997
35	0.328857	0.303251	0.355523	0.288613	0.253789	0.326127	0.368283	0.334399	0.403519	0.402099	0.366699	0.43855	0.365983	0.319057	0.415598	0.437582	0.391204	0.485078	0.22988	0.203928	0.258063	0.205764	0.171716	0.244569	0.254067	0.219761	0.291727	0.485455	0.445044	0.526056	0.413038	0.355645	0.472895	0.554614	0.504218	0.603912
36	0.331333	0.305411	0.358321	0.292214	0.256968	0.330146	0.369818	0.335449	0.405559	0.404175	0.367326	0.442137	0.369298	0.321107	0.420245	0.438587	0.390905	0.48743	0.230917	0.204311	0.259856	0.207681	0.17297	0.247274	0.254353	0.219442	0.292735	0.491026	0.44946	0.532718	0.419959	0.361618	0.480627	0.55913	0.507629	0.60939
37	0.33349	0.307328	0.360719	0.295214	0.259622	0.333487	0.371295	0.336527	0.407448	0.405987	0.367777	0.445369	0.372034	0.322664	0.424226	0.439614	0.390698	0.489733	0.231823	0.20462	0.261453	0.209245	0.173947	0.249542	0.254719	0.219254	0.293762	0.495889	0.453274	0.538565	0.425851	0.366648	0.487258	0.563215	0.510717	0.614333
38	0.335309	0.309017	0.362664	0.297572	0.261762	0.336051	0.372711	0.337673	0.409138	0.407521	0.36812	0.448148	0.374155	0.323771	0.427424	0.440666	0.390665	0.491902	0.23259	0.20489	0.262798	0.210433	0.17467	0.251289	0.255168	0.219241	0.294761	0.500008	0.456517	0.543498	0.430647	0.370749	0.492647	0.56685	0.513535	0.61866
39	0.336772	0.310485	0.364109	0.299248	0.263393	0.337746	0.374063	0.338918	0.410589	0.408763	0.368402	0.450393	0.37563	0.32446	0.429736	0.441744	0.390873	0.493868	0.233211	0.205146	0.263842	0.211223	0.175158	0.252441	0.255706	0.219443	0.295691	0.503347	0.459209	0.547433	0.434288	0.373926	0.496665	0.570018	0.516122	0.622303
40	0.33786	0.311735	0.365014	0.300206	0.264516	0.338494	0.375348	0.340285	0.411767	0.409701	0.368658	0.452041	0.376426	0.324749	0.431077	0.442849	0.391375	0.495581	0.233679	0.205407	0.264546	0.211594	0.175422	0.252936	0.256336	0.219893	0.296523	0.505873	0.461356	0.550298	0.436715	0.376178	0.499198	0.572701	0.518504	0.625207
41	0.338557	0.312763	0.365346	0.300411	0.265126	0.338231	0.376562	0.341793	0.41265	0.41032	0.368909	0.453042	0.376514	0.324643	0.43138	0.443982	0.392209	0.497	0.233986	0.205686	0.26488	0.211526	0.175468	0.252723	0.257062	0.220615	0.297235	0.507552	0.462956	0.552029	0.437872	0.377493	0.500149	0.574881	0.520694	0.627326
42	0.338852	0.313563	0.365096	0.299848	0.265218	0.336927	0.377703	0.343443	0.41323	0.410614	0.369164	0.453373	0.37588	0.324143	0.430614	0.445142	0.393392	0.49811	0.234129	0.20599	0.264831	0.211012	0.175298	0.251781	0.257887	0.221622	0.297816	0.508368	0.464007	0.552598	0.437731	0.377866	0.499467	0.576549	0.522697	0.628642
43	0.338772	0.314133	0.364316	0.298568	0.264813	0.334667	0.378774	0.34521	0.41354	0.410604	0.369418	0.453083	0.374573	0.323265	0.428863	0.446328	0.394895	0.498937	0.23412	0.206312	0.264428	0.210083	0.174922	0.250169	0.258805	0.222892	0.298284	0.508371	0.464534	0.552081	0.436372	0.37735	0.497254	0.577734	0.524511	0.629211
44	0.338348	0.31447	0.36308	0.296638	0.263936	0.331567	0.379775	0.347054	0.413627	0.410321	0.369658	0.452247	0.372655	0.322021	0.426245	0.447535	0.396668	0.499525	0.233975	0.206644	0.263719	0.208782	0.174348	0.247974	0.259807	0.22439	0.298663	0.507632	0.464566	0.550584	0.433901	0.376006	0.493659	0.578472	0.526124	0.629113
45	0.337616	0.314565	0.361466	0.294129	0.262604	0.327756	0.380711	0.348931	0.413547	0.409791	0.369863	0.450944	0.370192	0.320418	0.422887	0.448759	0.398655	0.499924	0.233709	0.206971	0.262756	0.207152	0.17358	0.245288	0.260886	0.226076	0.298985	0.506217	0.464124	0.548221	0.430427	0.373886	0.488842	0.578798	0.527518	0.628432
46	0.336608	0.314405	0.359557	0.291111	0.260832	0.323368	0.381583	0.350789	0.413358	0.409044	0.370009	0.44926	0.367249	0.318457	0.418922	0.449996	0.400796	0.500193	0.233338	0.207277	0.261595	0.205236	0.17262	0.242211	0.262033	0.227907	0.299288	0.504195	0.463226	0.545108	0.426058	0.37104	0.48297	0.578749	0.528671	0.627257
47	0.33536	0.313976	0.357442	0.287657	0.258629	0.318542	0.382394	0.352574	0.413126	0.408109	0.370066	0.447286	0.363892	0.316139	0.414487	0.451241	0.403022	0.500394	0.232878	0.207541	0.260291	0.203079	0.171466	0.238841	0.263239	0.229836	0.299609	0.501635	0.461884	0.541364	0.420907	0.367512	0.476218	0.57836	0.529555	0.62568
48	0.333905	0.313262	0.355205	0.283837	0.256005	0.31342	0.383146	0.35423	0.412914	0.407015	0.370001	0.445116	0.360187	0.313462	0.40972	0.452492	0.405266	0.500589	0.232344	0.207744	0.258906	0.200724	0.170116	0.235279	0.264498	0.231814	0.29999	0.498605	0.46011	0.537116	0.415083	0.363345	0.468765	0.577666	0.53014	0.623797
49	0.332279	0.312251	0.352932	0.279722	0.252968	0.308139	0.383843	0.355699	0.412787	0.405791	0.369782	0.442843	0.356198	0.310428	0.404755	0.453743	0.407456	0.500845	0.231753	0.207864	0.257495	0.198213	0.168569	0.231619	0.265799	0.23379	0.300472	0.495174	0.457913	0.532488	0.408701	0.358581	0.460794	0.576703	0.530396	0.621701
50	0.330513	0.310935	0.350698	0.275382	0.249533	0.302828	0.384487	0.356932	0.412804	0.404466	0.369377	0.44056	0.35199	0.307045	0.399719	0.454992	0.409526	0.50122	0.23112	0.207882	0.256116	0.195588	0.166826	0.227952	0.267134	0.235715	0.301092	0.491411	0.455304	0.527607	0.401871	0.353266	0.452484	0.575506	0.530294	0.619488
51	0.328644	0.309321	0.348565	0.270884	0.245726	0.297603	0.385081	0.357889	0.41301	0.403069	0.368759	0.438354	0.347627	0.303329	0.394728	0.456233	0.411417	0.501769	0.230461	0.207782	0.254819	0.192889	0.164895	0.224359	0.268496	0.237544	0.301884	0.487384	0.452297	0.522597	0.394705	0.347452	0.444011	0.574109	0.529814	0.617246
52	0.326704	0.307432	0.34658	0.266294	0.241585	0.292556	0.385627	0.358547	0.413433	0.401628	0.36791	0.436302	0.343171	0.299312	0.389881	0.457462	0.413079	0.502531	0.229792	0.207555	0.253648	0.190155	0.162789	0.220908	0.269874	0.239238	0.302871	0.483164	0.448915	0.517573	0.387313	0.341201	0.435536	0.572548	0.528943	0.615054
53	0.324727	0.30531	0.344767	0.261675	0.23717	0.287757	0.386128	0.358905	0.414081	0.400171	0.366828	0.434467	0.338684	0.295039	0.385257	0.458677	0.414481	0.503532	0.229127	0.207199	0.252636	0.187424	0.160531	0.217654	0.27126	0.240771	0.304064	0.47882	0.445195	0.512637	0.379803	0.33459	0.427203	0.570858	0.527687	0.612976
54	0.322745	0.30301	0.343134	0.257088	0.232558	0.283251	0.386586	0.358982	0.414939	0.398729	0.365525	0.432891	0.334226	0.290572	0.380917	0.459871	0.415607	0.504778	0.228482	0.206722	0.251805	0.184731	0.158152	0.214638	0.272646	0.242126	0.305462	0.47442	0.441189	0.507879	0.372281	0.32771	0.419135	0.569074	0.526068	0.611062
55	0.320792	0.300603	0.341674	0.252591	0.227841	0.279059	0.387006	0.358817	0.415972	0.397328	0.364034	0.4316	0.329855	0.285988	0.3769	0.461042	0.416462	0.506254	0.227872	0.206146	0.251164	0.18211	0.155695	0.211882	0.274021	0.243301	0.307046	0.470034	0.436968	0.503365	0.364851	0.320671	0.411432	0.567232	0.524129	0.609341
56	0.318898	0.298167	0.340371	0.24824	0.22312	0.275186	0.387388	0.358463	0.41713	0.395996	0.362407	0.430597	0.325629	0.281375	0.373227	0.462186	0.417072	0.507927	0.227313	0.2055	0.250711	0.179595	0.153211	0.209399	0.275377	0.244308	0.308783	0.465731	0.43262	0.499146	0.357611	0.313595	0.404168	0.565367	0.521932	0.607822
57	0.317096	0.29578	0.339208	0.244086	0.2185	0.271628	0.387737	0.357979	0.418356	0.394763	0.360709	0.42987	0.321601	0.27683	0.369909	0.463297	0.417476	0.509748	0.226819	0.204822	0.250434	0.177216	0.150755	0.207189	0.276704	0.245168	0.310628	0.461578	0.428251	0.495252	0.350658	0.306617	0.3974	0.563516	0.519557	0.6065
58	0.315416	0.293519	0.338165	0.240181	0.214081	0.268377	0.388054	0.35743	0.419588	0.393656	0.359018	0.429397	0.317827	0.272453	0.366946	0.464373	0.417724	0.511654	0.226405	0.204158	0.250313	0.175004	0.148386	0.205246	0.277993	0.245911	0.312527	0.457645	0.423978	0.491704	0.344084	0.299877	0.391166	0.561714	0.517097	0.605356
59	0.313891	0.291458	0.337228	0.236573	0.209959	0.265428	0.388342	0.356877	0.420767	0.392703	0.357417	0.429146	0.314358	0.268345	0.364332	0.465409	0.417874	0.51358	0.226086	0.203554	0.250328	0.172987	0.146163	0.203561	0.279235	0.246571	0.31442	0.453998	0.419922	0.488511	0.337976	0.293514	0.385498	0.559998	0.514651	0.604365
60	0.312544	0.289655	0.336384	0.233297	0.206206	0.26277	0.388605	0.356374	0.42184	0.391925	0.355979	0.429084	0.311236	0.26459	0.362057	0.466401	0.417983	0.51546	0.225874	0.203052	0.250454	0.171188	0.144135	0.202119	0.280421	0.247182	0.316252	0.450693	0.416192	0.485675	0.332402	0.287645	0.380405	0.558396	0.512312	0.603496
61	0.311375	0.288124	0.335619	0.230349	0.202837	0.260373	0.388842	0.355948	0.422781	0.391325	0.354738	0.429176	0.308457	0.261212	0.360083	0.46735	0.418091	0.517255	0.225769	0.202672	0.25067	0.169602	0.142318	0.200893	0.28155	0.24777	0.317989	0.447732	0.412825	0.483162	0.327358	0.2823	0.375843	0.556913	0.510125	0.602714
62	0.310381	0.286862	0.334923	0.227712	0.199846	0.25821	0.389055	0.355612	0.423575	0.390897	0.35371	0.429396	0.30601	0.258215	0.358378	0.468258	0.418221	0.518941	0.225768	0.20242	0.250961	0.168221	0.140714	0.199855	0.282625	0.248354	0.319614	0.445106	0.409832	0.480942	0.322821	0.277478	0.371762	0.555547	0.508115	0.601988
63	0.309555	0.28586	0.334294	0.225373	0.197221	0.256261	0.389244	0.355372	0.424219	0.390637	0.352901	0.429729	0.303881	0.255596	0.356915	0.469124	0.418391	0.520503	0.225869	0.2023	0.251318	0.167036	0.139322	0.198988	0.283645	0.248943	0.321116	0.442807	0.407217	0.478994	0.31877	0.273172	0.368124	0.554294	0.506296	0.601299
64	0.308892	0.285106	0.333737	0.223319	0.194947	0.254515	0.389409	0.355226	0.424715	0.39054	0.352311	0.430163	0.302061	0.253347	0.355679	0.46995	0.41861	0.521934	0.226069	0.202308	0.25174	0.166039	0.138138	0.198278	0.284611	0.249542	0.322491	0.440824	0.404972	0.477304	0.315184	0.269368	0.364901	0.553151	0.504676	0.600636
65	0.308388	0.284582	0.333259	0.221538	0.193007	0.252964	0.389552	0.355167	0.425071	0.390603	0.351933	0.430698	0.300537	0.251457	0.354657	0.470737	0.418879	0.523234	0.226366	0.202437	0.252228	0.165222	0.137154	0.197717	0.285526	0.250153	0.323742	0.439149	0.403085	0.475866	0.312045	0.266049	0.362071	0.552117	0.503254	0.599994
66	0.308038	0.284265	0.332875	0.220018	0.191381	0.251606	0.389673	0.355184	0.425302	0.39082	0.351756	0.431336	0.299299	0.249912	0.353843	0.471486	0.419198	0.524408	0.226757	0.202678	0.25279	0.164579	0.136361	0.197301	0.28639	0.25077	0.324875	0.437772	0.401539	0.474681	0.309335	0.263193	0.359617	0.551187	0.502021	0.599373
67	0.307838	0.28413	0.332604	0.218748	0.190048	0.250442	0.389772	0.355259	0.425425	0.391188	0.351764	0.432085	0.298339	0.248694	0.353234	0.472198	0.419557	0.525465	0.227241	0.203017	0.253436	0.164103	0.135749	0.197029	0.287204	0.251385	0.325904	0.436685	0.400309	0.473755	0.307035	0.260776	0.357531	0.550361	0.500968	0.59878
68	0.307782	0.284148	0.332468	0.217719	0.188986	0.249477	0.38985	0.355372	0.425465	0.391703	0.351939	0.432957	0.297645	0.247785	0.352833	0.472875	0.419945	0.526421	0.227814	0.203436	0.254181	0.163789	0.135305	0.196904	0.287969	0.251987	0.326844	0.43588	0.399368	0.4731	0.305131	0.258772	0.355808	0.549633	0.500075	0.598226
69	0.307867	0.284283	0.332498	0.216921	0.18817	0.248719	0.389908	0.355497	0.42545	0.392359	0.352257	0.433968	0.29721	0.247164	0.352644	0.473516	0.420346	0.527294	0.228475	0.203918	0.255043	0.163631	0.135015	0.19693	0.288687	0.25256	0.327717	0.435347	0.398685	0.47273	0.303606	0.257152	0.354447	0.549003	0.499321	0.597726
70	0.308088	0.284499	0.332724	0.216345	0.187575	0.24818	0.389946	0.355605	0.425413	0.393154	0.352693	0.435137	0.297025	0.246809	0.352675	0.474124	0.420741	0.528105	0.229222	0.20444	0.256042	0.163623	0.134867	0.197114	0.289359	0.253086	0.328545	0.435078	0.398222	0.472665	0.302446	0.255888	0.353451	0.548466	0.498682	0.597299
71	0.308442	0.284753	0.333183	0.215984	0.187176	0.247875	0.389965	0.355663	0.425391	0.394084	0.353218	0.436486	0.297082	0.246696	0.352938	0.474699	0.421107	0.528879	0.230053	0.204979	0.257202	0.163762	0.134843	0.197468	0.289986	0.253544	0.329356	0.435065	0.397943	0.472929	0.301638	0.25495	0.352828	0.54802	0.498126	0.596968
72	0.308924	0.285005	0.333913	0.21583	0.186944	0.247819	0.389965	0.355632	0.425425	0.395143	0.353804	0.438039	0.297373	0.2468	0.353446	0.475242	0.421421	0.529644	0.230965	0.20551	0.258547	0.164043	0.134929	0.198001	0.29057	0.253911	0.33018	0.435299	0.397807	0.473545	0.301169	0.254305	0.352586	0.547663	0.497623	0.596757
73	0.30953	0.285212	0.334951	0.215875	0.186851	0.248033	0.389948	0.355476	0.425556	0.396329	0.354418	0.43982	0.297891	0.247096	0.354216	0.475754	0.421654	0.53043	0.231957	0.206011	0.260101	0.164461	0.135107	0.198729	0.291111	0.254163	0.331047	0.435772	0.397775	0.47454	0.301027	0.253921	0.352739	0.54739	0.497136	0.596696
74	0.310257	0.285336	0.33633	0.216113	0.186867	0.248537	0.389914	0.355153	0.425829	0.397637	0.35503	0.441855	0.298629	0.247555	0.355264	0.476237	0.421778	0.531267	0.233026	0.206456	0.261888	0.165014	0.135359	0.199665	0.291612	0.254274	0.331992	0.436477	0.397805	0.475938	0.301199	0.253765	0.353302	0.5472	0.49663	0.596814
75	0.311101	0.285346	0.33808	0.216537	0.186964	0.249354	0.389863	0.354627	0.426287	0.399064	0.355611	0.444168	0.299579	0.248149	0.356612	0.476691	0.421764	0.532188	0.234171	0.206825	0.26393	0.165696	0.135668	0.200825	0.292073	0.254222	0.333044	0.437405	0.39786	0.477762	0.301676	0.253804	0.35429	0.547089	0.496068	0.59714
76	0.312057	0.285218	0.34022	0.217142	0.187112	0.250506	0.389795	0.353862	0.426967	0.400605	0.356131	0.44678	0.300735	0.24885	0.358279	0.477118	0.421583	0.533225	0.23539	0.207101	0.266245	0.166505	0.136016	0.202227	0.292496	0.253981	0.334236	0.438548	0.397906	0.480032	0.302447	0.254005	0.355721	0.547055	0.495412	0.597705
77	0.313123	0.284935	0.342762	0.21792	0.187285	0.252013	0.389713	0.35283	0.427902	0.402257	0.356566	0.449711	0.302091	0.249628	0.360286	0.477518	0.421207	0.534407	0.236681	0.20727	0.26885	0.167436	0.136386	0.203887	0.292883	0.253533	0.335594	0.439899	0.397915	0.482761	0.303501	0.254335	0.357613	0.547094	0.494627	0.598535
78	0.314294	0.284492	0.345709	0.218868	0.187458	0.253896	0.389616	0.351511	0.429117	0.404016	0.356894	0.452977	0.30364	0.250455	0.362654	0.477893	0.42061	0.535764	0.238041	0.20732	0.271753	0.168488	0.136761	0.205821	0.293234	0.252862	0.337143	0.441449	0.397864	0.485956	0.304829	0.254764	0.359981	0.547204	0.493683	0.599655
79	0.315567	0.283889	0.349056	0.219979	0.187611	0.25617	0.389504	0.349893	0.43063	0.405877	0.357098	0.456586	0.305375	0.251303	0.365403	0.478244	0.41977	0.53732	0.239469	0.207248	0.274962	0.169657	0.137126	0.208045	0.293551	0.251956	0.338901	0.443191	0.397734	0.489619	0.306422	0.255262	0.362839	0.547381	0.492553	0.601083
80	0.316937	0.283133	0.352792	0.221247	0.187725	0.258848	0.389379	0.347971	0.432447	0.407836	0.357165	0.460546	0.307291	0.252148	0.368551	0.478571	0.41867	0.539095	0.240963	0.207051	0.278479	0.17094	0.137468	0.210572	0.293835	0.250809	0.340884	0.445116	0.397516	0.493745	0.30827	0.255805	0.366201	0.547623	0.491214	0.602835
81	0.318403	0.282233	0.356903	0.222669	0.187789	0.261939	0.389241	0.345752	0.434568	0.409891	0.357088	0.464856	0.309382	0.252966	0.372111	0.478876	0.417296	0.541105	0.242521	0.20673	0.282304	0.172333	0.137776	0.213413	0.294089	0.249421	0.3431	0.447217	0.397203	0.498323	0.310365	0.256368	0.370075	0.547927	0.489651	0.604917
82	0.319958	0.2812	0.361373	0.224239	0.187793	0.265446	0.389091	0.343245	0.436986	0.412036	0.356862	0.469513	0.31164	0.253738	0.376097	0.47916	0.415639	0.543362	0.244141	0.20629	0.286431	0.173835	0.13804	0.21658	0.294313	0.247794	0.345553	0.449487	0.396794	0.503338	0.312698	0.256934	0.374465	0.548289	0.487855	0.607331
83	0.321601	0.280049	0.366183	0.225951	0.187732	0.269371	0.388929	0.340467	0.439691	0.414268	0.356486	0.474509	0.314061	0.254445	0.380515	0.479423	0.413698	0.545869	0.245821	0.205735	0.290856	0.175441	0.138253	0.220078	0.294508	0.245936	0.348243	0.451916	0.396289	0.508771	0.315259	0.257485	0.379373	0.548707	0.485822	0.610074
84	0.323327	0.27879	0.371316	0.227802	0.187605	0.273709	0.388757	0.337437	0.442667	0.416582	0.355963	0.479833	0.316637	0.255075	0.38537	0.479668	0.411474	0.548628	0.247558	0.205074	0.295571	0.17715	0.138411	0.223913	0.294677	0.24386	0.351167	0.454497	0.395694	0.514598	0.31804	0.25801	0.384794	0.549178	0.483553	0.613135
85	0.325132	0.277436	0.376753	0.229785	0.187411	0.278456	0.388573	0.334175	0.445897	0.418975	0.355298	0.48547	0.319362	0.255618	0.39066	0.479895	0.408974	0.551635	0.249351	0.204313	0.300568	0.178957	0.13851	0.228088	0.294821	0.241578	0.354317	0.457222	0.395012	0.520796	0.321033	0.258499	0.390722	0.549699	0.481054	0.616503
86	0.327013	0.275998	0.382477	0.231896	0.187154	0.283602	0.38838	0.330703	0.449363	0.421442	0.354497	0.491405	0.322231	0.256067	0.396381	0.480104	0.406207	0.554882	0.251198	0.203461	0.305836	0.180861	0.13855	0.232603	0.294941	0.239107	0.357685	0.460084	0.394252	0.527339	0.324228	0.258948	0.397145	0.550266	0.478332	0.620158
87	0.328966	0.274485	0.38847	0.23413	0.186837	0.289138	0.388178	0.327042	0.453048	0.423979	0.353567	0.497619	0.325236	0.256419	0.402523	0.480298	0.403186	0.55836	0.253096	0.202525	0.311366	0.182857	0.138532	0.237457	0.295039	0.236462	0.361261	0.463073	0.393418	0.534199	0.327615	0.25935	0.404047	0.550878	0.4754	0.624084
88	0.330987	0.272907	0.394716	0.236482	0.186463	0.295051	0.387967	0.323213	0.456935	0.426582	0.352517	0.504093	0.32837	0.256672	0.409076	0.480477	0.399926	0.562056	0.255044	0.201512	0.317147	0.184944	0.138455	0.242646	0.295115	0.23366	0.365035	0.466181	0.392518	0.54135	0.331187	0.259706	0.41141	0.55153	0.472269	0.628258
89	0.333071	0.271272	0.401199	0.238946	0.186038	0.301329	0.387748	0.319237	0.461006	0.429247	0.351356	0.510807	0.331628	0.256826	0.416022	0.480642	0.396443	0.565955	0.257038	0.200431	0.32317	0.187116	0.138322	0.248166	0.295173	0.23072	0.368995	0.469401	0.391557	0.548764	0.334934	0.260013	0.419212	0.552221	0.468954	0.632658
90	0.335216	0.269586	0.407901	0.241516	0.185567	0.307957	0.387522	0.315131	0.465246	0.431968	0.350091	0.51774	0.335002	0.256884	0.423343	0.480794	0.392754	0.570043	0.259076	0.199288	0.329422	0.189372	0.138137	0.254011	0.295212	0.227657	0.373129	0.472724	0.390541	0.556413	0.338844	0.260273	0.427429	0.552946	0.465469	0.637264
91	0.337417	0.267857	0.414807	0.244189	0.185052	0.31492	0.387289	0.310914	0.469639	0.434743	0.348731	0.524873	0.338485	0.25685	0.431019	0.480935	0.388879	0.574303	0.261157	0.19809	0.335892	0.191708	0.137901	0.260172	0.295235	0.224488	0.377428	0.476141	0.389475	0.564269	0.34291	0.260487	0.436036	0.553704	0.461829	0.642051
92	0.33967	0.26609	0.4219	0.246956	0.184499	0.322203	0.38705	0.306604	0.47417	0.437567	0.347285	0.532183	0.34207	0.256727	0.439026	0.481065	0.384834	0.578721	0.263278	0.196844	0.34257	0.194119	0.137619	0.266643	0.295244	0.221229	0.381878	0.479645	0.388365	0.572304	0.34712	0.260655	0.445004	0.55449	0.458046	0.646999
93	0.34197	0.26429	0.429164	0.249813	0.183911	0.329789	0.386806	0.302215	0.478826	0.440434	0.34576	0.539649	0.345748	0.25652	0.44734	0.481185	0.380637	0.583281	0.265435	0.195553	0.349442	0.196602	0.137293	0.273411	0.295238	0.217895	0.38647	0.483226	0.387213	0.580493	0.351464	0.26078	0.454302	0.555303	0.454135	0.652085
94	0.344314	0.262462	0.436583	0.252754	0.18329	0.337659	0.386557	0.297764	0.483594	0.443341	0.344163	0.547252	0.349514	0.256234	0.455934	0.481297	0.376307	0.587966	0.267628	0.194226	0.356497	0.199153	0.136927	0.280467	0.295221	0.2145	0.391192	0.486875	0.386024	0.588806	0.35593	0.260862	0.4639	0.556138	0.45011	0.657289
95	0.346698	0.26061	0.444141	0.255771	0.182641	0.345795	0.386303	0.293263	0.48846	0.446284	0.342503	0.554969	0.353358	0.255875	0.464782	0.481402	0.37186	0.592761	0.269852	0.192865	0.363722	0.201767	0.136524	0.287799	0.295194	0.211057	0.396034	0.490585	0.384801	0.597219	0.360508	0.260903	0.473765	0.556994	0.445982	0.662591
96	0.349116	0.258738	0.451821	0.258859	0.181966	0.354178	0.386046	0.288727	0.493413	0.449257	0.340785	0.562779	0.357272	0.255446	0.473856	0.4815	0.367314	0.597652	0.272106	0.191476	0.371104	0.204441	0.136086	0.295391	0.295157	0.207581	0.400985	0.494346	0.383546	0.605704	0.365186	0.260905	0.483862	0.557867	0.441765	0.667972
97	0.351565	0.256851	0.459605	0.26201	0.181265	0.362786	0.385786	0.284168	0.498441	0.452256	0.339016	0.570664	0.361249	0.254953	0.483125	0.481593	0.362685	0.602624	0.274386	0.190064	0.37863	0.20717	0.135616	0.303231	0.295113	0.204081	0.406036	0.498149	0.382261	0.614237	0.369952	0.260867	0.494156	0.558755	0.43747	0.673412
98	0.35404	0.25495	0.467478	0.265218	0.180542	0.371598	0.385524	0.279597	0.503531	0.455276	0.337202	0.578602	0.365279	0.254399	0.492561	0.481682	0.357987	0.607663	0.276691	0.188633	0.386284	0.209947	0.135118	0.311302	0.295063	0.200571	0.411176	0.501987	0.38095	0.622791	0.374794	0.26079	0.504613	0.559654	0.433108	0.678894
99	0.356537	0.25304	0.475423	0.268474	0.179798	0.380592	0.385259	0.275026	0.508675	0.458313	0.335349	0.586574	0.369355	0.253789	0.502133	0.481767	0.353237	0.612757	0.279016	0.187186	0.394054	0.21277	0.134593	0.319587	0.295009	0.19706	0.416396	0.505849	0.379612	0.631344	0.379698	0.260675	0.515196	0.560561	0.42869	0.684401
100	0.359051	0.251123	0.483421	0.271772	0.179033	0.389744	0.384994	0.270466	0.513859	0.461362	0.333462	0.59456	0.373467	0.253127	0.511812	0.481851	0.348449	0.617891	0.281359	0.185728	0.401924	0.215632	0.134043	0.328067	0.294952	0.193559	0.421685	0.509727	0.378251	0.639872	0.384653	0.260521	0.525869	0.561473	0.424227	0.689917

## Sheet: ANY
	BELGIUM									BRUSSELS									FLANDERS									WALLONIA
	Both			Male			Female			Both			Male			Female			Both			Male			Female			Both			Male			Female
Age	mean	lwr	upr	mean	lwr	upr	mean	lwr	upr	mean	lwr	upr	mean	lwr	upr	mean	lwr	upr	mean	lwr	upr	mean	lwr	upr	mean	lwr	upr	mean	lwr	upr	mean	lwr	upr	mean	lwr	upr
ALL	0.640483	0.624331	0.656323	0.582304	0.558975	0.60527	0.695059	0.675278	0.714146	0.628835	0.60073	0.656094	0.569253	0.535964	0.601927	0.68431	0.654348	0.712814	0.592804	0.569788	0.615419	0.531923	0.502969	0.560663	0.650835	0.624973	0.675839	0.729986	0.703991	0.754494	0.679165	0.647023	0.709693	0.776396	0.75052	0.800302
15	0.478881	0.406079	0.55259	0.398569	0.326863	0.474908	0.559745	0.481741	0.634907	0.473202	0.396025	0.551682	0.357811	0.275032	0.450038	0.587998	0.490907	0.678693	0.41812	0.345717	0.494231	0.307909	0.23347	0.393886	0.532619	0.437546	0.625382	0.576112	0.497664	0.650903	0.458415	0.364907	0.554946	0.684353	0.593692	0.762864
16	0.484	0.417735	0.550832	0.408169	0.342559	0.477224	0.559917	0.489675	0.627839	0.477208	0.406193	0.549156	0.370064	0.293279	0.454037	0.583298	0.495437	0.666169	0.424738	0.35791	0.494435	0.32161	0.251905	0.400282	0.530434	0.444703	0.614405	0.579832	0.507815	0.648603	0.471287	0.385418	0.558889	0.679895	0.597593	0.75234
17	0.489115	0.429148	0.549397	0.417796	0.35805	0.480056	0.560123	0.497158	0.62121	0.48122	0.416036	0.547049	0.382423	0.311659	0.45855	0.578658	0.4995	0.65397	0.431365	0.36986	0.495063	0.335544	0.270727	0.407215	0.528303	0.451391	0.603894	0.583548	0.517453	0.64677	0.484131	0.405637	0.563416	0.675474	0.60095	0.742054
18	0.494218	0.440163	0.548409	0.427397	0.373039	0.483567	0.560394	0.504029	0.615244	0.485243	0.425413	0.545498	0.394804	0.329824	0.463728	0.574155	0.502958	0.642405	0.437981	0.381385	0.496239	0.349608	0.289566	0.414831	0.526282	0.457436	0.594143	0.587265	0.526433	0.645545	0.496865	0.425172	0.568686	0.671162	0.603625	0.732295
19	0.499301	0.450614	0.548002	0.43692	0.387197	0.487944	0.560766	0.510103	0.610194	0.489279	0.434174	0.544645	0.407124	0.347375	0.469753	0.569867	0.505649	0.631817	0.444565	0.392295	0.498091	0.36369	0.307987	0.423304	0.524428	0.462634	0.585483	0.590989	0.534614	0.645069	0.509404	0.443614	0.574871	0.667033	0.605459	0.723387
20	0.504355	0.460319	0.548324	0.446311	0.400195	0.493371	0.56127	0.515183	0.606324	0.493332	0.442178	0.544626	0.419296	0.363892	0.476812	0.565871	0.507398	0.622567	0.451095	0.402404	0.500741	0.377671	0.32552	0.432817	0.522796	0.466762	0.578262	0.594724	0.541881	0.64546	0.521669	0.460572	0.582124	0.663163	0.606299	0.715665
21	0.509372	0.469104	0.549519	0.455517	0.41176	0.499972	0.56194	0.519107	0.60387	0.497406	0.44931	0.54555	0.431231	0.378986	0.485053	0.562247	0.508056	0.614993	0.457551	0.411558	0.50428	0.391432	0.34172	0.443503	0.521442	0.469623	0.572804	0.598474	0.548165	0.646791	0.533579	0.475739	0.59053	0.659628	0.606038	0.709423
22	0.514345	0.476835	0.551693	0.464484	0.421753	0.507742	0.56281	0.521813	0.602966	0.501504	0.455513	0.547469	0.442842	0.392378	0.494514	0.559073	0.507568	0.609337	0.463912	0.419667	0.508733	0.404849	0.356265	0.455372	0.520423	0.471128	0.569323	0.602245	0.553475	0.649066	0.545058	0.488962	0.600034	0.656506	0.604687	0.704847
23	0.519263	0.483458	0.554872	0.473158	0.430219	0.516498	0.563911	0.523404	0.603583	0.505629	0.460813	0.550355	0.454041	0.403976	0.505052	0.556427	0.506044	0.605675	0.470156	0.426736	0.514033	0.417799	0.369026	0.468234	0.519793	0.471378	0.567839	0.606042	0.557904	0.652206	0.556034	0.500277	0.610415	0.653874	0.602417	0.701967
24	0.524121	0.48904	0.558966	0.481489	0.437366	0.525902	0.565277	0.524151	0.605523	0.509785	0.465325	0.554092	0.464742	0.413892	0.516337	0.554388	0.503782	0.60389	0.476263	0.432869	0.520019	0.430159	0.380089	0.4817	0.51961	0.470687	0.568159	0.609868	0.561621	0.656056	0.566437	0.509896	0.621301	0.651811	0.599561	0.700648
25	0.52891	0.493762	0.563773	0.489423	0.443487	0.535539	0.56694	0.524435	0.608482	0.513975	0.469234	0.558493	0.474863	0.422379	0.527908	0.553034	0.501223	0.603718	0.482212	0.438244	0.526459	0.441811	0.389678	0.49526	0.519928	0.469515	0.569938	0.613728	0.564845	0.66042	0.576202	0.518123	0.63225	0.650394	0.596555	0.700654
26	0.533621	0.497876	0.569024	0.496911	0.448882	0.544998	0.568932	0.524654	0.612136	0.518203	0.472768	0.563338	0.484321	0.429744	0.539275	0.552442	0.498855	0.604838	0.487983	0.443072	0.533089	0.452639	0.398062	0.508378	0.520804	0.468364	0.57279	0.617626	0.567809	0.665087	0.585268	0.525282	0.642828	0.649699	0.593861	0.701716
27	0.538248	0.501651	0.574437	0.503904	0.453808	0.553922	0.571286	0.525169	0.616197	0.522471	0.476153	0.568405	0.493039	0.436274	0.549984	0.55269	0.497147	0.606949	0.493555	0.447567	0.539652	0.46253	0.40549	0.520567	0.522293	0.467693	0.576365	0.621567	0.570735	0.669861	0.593576	0.531656	0.652658	0.6498	0.591912	0.703589
28	0.542782	0.505329	0.579758	0.510354	0.458468	0.562018	0.574033	0.526283	0.620441	0.526782	0.479599	0.573492	0.50094	0.442201	0.559654	0.553853	0.496503	0.609805	0.498907	0.451915	0.545919	0.471378	0.412156	0.531417	0.52445	0.467891	0.580389	0.625554	0.573815	0.674574	0.601072	0.537472	0.661436	0.65077	0.591082	0.706078
29	0.547216	0.509106	0.584781	0.516214	0.46301	0.569054	0.577203	0.528235	0.624699	0.531141	0.48328	0.578436	0.507953	0.447696	0.56798	0.556007	0.497258	0.61323	0.504022	0.456271	0.551699	0.47908	0.418197	0.540592	0.52733	0.469273	0.584657	0.629592	0.57721	0.679092	0.607704	0.542895	0.668927	0.652677	0.591684	0.709039
30	0.551543	0.513132	0.58935	0.521439	0.467537	0.574847	0.580827	0.531215	0.628856	0.53555	0.487333	0.583111	0.514006	0.452873	0.574723	0.559223	0.499684	0.617107	0.508878	0.460751	0.556841	0.485538	0.423696	0.547826	0.530987	0.47209	0.589034	0.633685	0.581045	0.683315	0.61342	0.548038	0.674954	0.655585	0.593971	0.712377
31	0.555756	0.517506	0.593357	0.525984	0.472112	0.579258	0.584934	0.535367	0.632839	0.540012	0.491857	0.587432	0.519032	0.457792	0.579705	0.563574	0.50399	0.621378	0.513457	0.465433	0.561235	0.490656	0.42869	0.55291	0.535475	0.476534	0.59344	0.637835	0.585407	0.687176	0.618171	0.552961	0.679385	0.659555	0.598134	0.716045
32	0.559847	0.522279	0.596742	0.529805	0.476759	0.582187	0.589551	0.540787	0.636616	0.54453	0.496902	0.591357	0.522962	0.462458	0.582799	0.569127	0.510325	0.626041	0.517741	0.470353	0.564812	0.494341	0.433163	0.555689	0.540844	0.482746	0.597852	0.642047	0.590345	0.690643	0.621908	0.557674	0.682131	0.664638	0.604299	0.720039
33	0.563809	0.527443	0.599502	0.532859	0.481453	0.583576	0.594706	0.547521	0.640204	0.549107	0.502469	0.594897	0.52573	0.466811	0.583941	0.575944	0.518761	0.631163	0.52171	0.475498	0.567554	0.496502	0.437043	0.556061	0.547145	0.490794	0.602312	0.646323	0.59586	0.693725	0.624579	0.562129	0.683143	0.670879	0.612517	0.724406
34	0.567651	0.532896	0.601752	0.535138	0.486107	0.583499	0.600413	0.555497	0.643702	0.553754	0.508472	0.59816	0.527327	0.470725	0.583236	0.58404	0.52919	0.636885	0.525368	0.480784	0.569551	0.497119	0.440205	0.554108	0.554394	0.500586	0.606956	0.650674	0.601876	0.696507	0.626184	0.566216	0.682511	0.678272	0.622657	0.729255
35	0.571436	0.538412	0.603835	0.536782	0.490574	0.582368	0.606649	0.564404	0.647357	0.558512	0.514707	0.601424	0.527972	0.47407	0.58123	0.593255	0.541092	0.643397	0.528802	0.486045	0.57114	0.496452	0.442566	0.55042	0.562482	0.511654	0.612031	0.655133	0.608203	0.699223	0.626927	0.569821	0.680701	0.686647	0.634199	0.734721
36	0.575244	0.543726	0.606162	0.537968	0.494666	0.580705	0.613378	0.573848	0.651468	0.56343	0.520947	0.605002	0.527939	0.476695	0.578602	0.603383	0.553827	0.650905	0.53212	0.491093	0.572717	0.49483	0.444027	0.545741	0.571269	0.5234	0.617839	0.659741	0.614625	0.702135	0.627064	0.572816	0.678291	0.695794	0.646519	0.740952
37	0.579154	0.548598	0.609115	0.538871	0.498175	0.579055	0.620564	0.583426	0.656341	0.568558	0.526999	0.609174	0.527503	0.478447	0.576034	0.614217	0.56677	0.65959	0.535431	0.495761	0.574657	0.492584	0.444476	0.540831	0.580612	0.535223	0.624676	0.664535	0.620955	0.705481	0.626844	0.575069	0.675867	0.705505	0.659023	0.748073
38	0.583242	0.552895	0.612971	0.539666	0.500917	0.577941	0.628169	0.592778	0.662236	0.573943	0.532752	0.614132	0.526939	0.479247	0.574144	0.625552	0.579402	0.669527	0.538842	0.499951	0.577265	0.490044	0.443851	0.536407	0.590369	0.546596	0.632756	0.669552	0.627066	0.70944	0.626522	0.576505	0.673973	0.715581	0.671216	0.756135
39	0.587585	0.556666	0.617828	0.540527	0.502812	0.577784	0.636156	0.601669	0.669297	0.579631	0.53822	0.61995	0.52652	0.479176	0.573393	0.637185	0.591398	0.680612	0.54246	0.503691	0.580721	0.487539	0.442238	0.533046	0.6004	0.557182	0.642109	0.674827	0.632932	0.714101	0.626348	0.577178	0.67304	0.72583	0.682772	0.765056
40	0.592258	0.560151	0.623596	0.541631	0.503968	0.578824	0.644484	0.610055	0.677481	0.585667	0.543548	0.626569	0.526522	0.478544	0.574015	0.64892	0.602674	0.69253	0.546392	0.507157	0.585059	0.485399	0.439946	0.531095	0.610565	0.566911	0.652517	0.680393	0.638634	0.719447	0.626576	0.577337	0.673324	0.736074	0.69357	0.774598
41	0.597334	0.56372	0.630058	0.543151	0.504716	0.581078	0.653115	0.61809	0.686557	0.592096	0.548988	0.633831	0.52722	0.477881	0.576032	0.66057	0.613343	0.704804	0.550744	0.510658	0.590182	0.483954	0.437529	0.530659	0.620729	0.575954	0.663539	0.686282	0.644357	0.72537	0.627455	0.577432	0.674891	0.746146	0.703676	0.784395
42	0.602885	0.567789	0.636952	0.54526	0.505554	0.584399	0.662007	0.626062	0.696174	0.598958	0.554849	0.641521	0.528886	0.477854	0.579321	0.671956	0.62363	0.716894	0.555621	0.514582	0.595914	0.483533	0.435702	0.531668	0.630761	0.584625	0.674624	0.692519	0.65035	0.731701	0.629236	0.578061	0.677666	0.755897	0.713265	0.794021
43	0.608979	0.572759	0.644036	0.548133	0.507051	0.588569	0.67112	0.634294	0.705956	0.606294	0.561451	0.649415	0.531795	0.479176	0.583716	0.682914	0.633773	0.728287	0.561124	0.519337	0.602061	0.484465	0.435242	0.533991	0.640534	0.593265	0.685224	0.699132	0.656882	0.738252	0.632165	0.579888	0.681509	0.765191	0.722544	0.80307
44	0.615682	0.578974	0.651119	0.551941	0.509758	0.593389	0.680412	0.643073	0.715572	0.614139	0.569079	0.657324	0.536218	0.482526	0.589083	0.69329	0.643967	0.738554	0.567354	0.525304	0.608456	0.48708	0.4369	0.537522	0.649929	0.602162	0.694868	0.70614	0.664198	0.744855	0.636477	0.583555	0.68629	0.773911	0.731687	0.811204
45	0.623056	0.586699	0.658079	0.556852	0.514148	0.598731	0.689842	0.652601	0.724775	0.622526	0.577955	0.665117	0.542421	0.4885	0.595366	0.702945	0.654321	0.74737	0.574409	0.532797	0.614993	0.491709	0.441347	0.54224	0.658834	0.611507	0.703194	0.713561	0.672482	0.751392	0.6424	0.589617	0.691942	0.78195	0.740798	0.818173
46	0.631107	0.595974	0.664902	0.562958	0.520447	0.604564	0.699346	0.662885	0.733449	0.631444	0.588107	0.67276	0.550557	0.497387	0.602596	0.711777	0.664785	0.754614	0.582318	0.541904	0.621656	0.498553	0.448933	0.548202	0.66715	0.621289	0.71005	0.721375	0.681744	0.757825	0.650045	0.598316	0.69847	0.78924	0.749845	0.823887
47	0.639637	0.606281	0.671697	0.570055	0.52822	0.610914	0.708759	0.673501	0.741671	0.640728	0.599097	0.680343	0.560338	0.508611	0.610786	0.71979	0.675028	0.760573	0.59086	0.552125	0.628498	0.507289	0.459055	0.555387	0.674815	0.631091	0.715691	0.729435	0.691598	0.764212	0.65912	0.609075	0.705852	0.795802	0.758578	0.828584
48	0.648405	0.616922	0.678648	0.577864	0.536833	0.617848	0.717908	0.683917	0.749583	0.650176	0.610346	0.688015	0.571364	0.521315	0.619995	0.727013	0.684618	0.765659	0.59975	0.562766	0.635632	0.517457	0.470794	0.563818	0.681778	0.640344	0.720523	0.737568	0.701548	0.770661	0.669236	0.621065	0.714103	0.80168	0.766665	0.832589
49	0.657178	0.627198	0.685954	0.586108	0.545662	0.625426	0.726629	0.693638	0.757311	0.659594	0.621287	0.695922	0.583235	0.534613	0.63029	0.733472	0.693116	0.77028	0.608714	0.573122	0.643185	0.528594	0.483176	0.573543	0.687991	0.648455	0.724967	0.745612	0.711122	0.777274	0.680012	0.633457	0.723238	0.806913	0.773777	0.836222
50	0.665731	0.636502	0.69374	0.594515	0.554162	0.633629	0.734773	0.702276	0.764911	0.668798	0.631439	0.704144	0.595551	0.547693	0.641659	0.739195	0.700155	0.774788	0.61748	0.582579	0.65121	0.540231	0.495286	0.584531	0.693408	0.654912	0.729385	0.753418	0.719941	0.784095	0.691083	0.64553	0.733201	0.811535	0.779647	0.839756
51	0.673851	0.644448	0.701947	0.602815	0.561951	0.642294	0.742204	0.709606	0.772318	0.677613	0.640482	0.71263	0.607924	0.559935	0.653915	0.744205	0.705527	0.779392	0.625788	0.590712	0.659591	0.551905	0.506412	0.596545	0.697984	0.659399	0.733961	0.76085	0.727769	0.791066	0.702102	0.656765	0.743787	0.815579	0.784142	0.843352
52	0.681337	0.650932	0.710272	0.61075	0.568834	0.651091	0.748797	0.715571	0.779338	0.685876	0.648298	0.721166	0.619978	0.570986	0.666641	0.748524	0.709253	0.784105	0.633388	0.597348	0.667995	0.563155	0.516138	0.609064	0.701673	0.661896	0.738618	0.767783	0.734538	0.79801	0.71275	0.666886	0.754622	0.819073	0.787304	0.847018
53	0.687998	0.656074	0.718231	0.618066	0.574779	0.659557	0.754433	0.72025	0.785683	0.693432	0.65494	0.729404	0.631353	0.580744	0.679227	0.752169	0.711571	0.78875	0.640037	0.602521	0.675917	0.573533	0.524322	0.62133	0.704428	0.662649	0.743038	0.774102	0.740311	0.804655	0.722731	0.675832	0.765203	0.822042	0.789346	0.850623
54	0.693651	0.660092	0.725276	0.624519	0.579854	0.66716	0.759001	0.723791	0.791019	0.700136	0.660558	0.736937	0.641711	0.589257	0.690979	0.755158	0.712857	0.793037	0.645502	0.606378	0.682773	0.582604	0.530988	0.632472	0.706199	0.662057	0.746779	0.779702	0.745228	0.810696	0.731781	0.683666	0.774985	0.824508	0.790584	0.853952
55	0.69812	0.663202	0.730886	0.62987	0.584161	0.673363	0.762389	0.726353	0.795019	0.70585	0.665323	0.743363	0.650732	0.596627	0.701215	0.757504	0.713526	0.796654	0.649554	0.609074	0.687989	0.589947	0.536206	0.641622	0.706931	0.660551	0.749379	0.784486	0.749438	0.815836	0.739654	0.690491	0.783457	0.82649	0.79136	0.856775
56	0.701229	0.665566	0.734604	0.633885	0.587782	0.67766	0.764482	0.728068	0.797376	0.710441	0.669358	0.748339	0.658114	0.602917	0.709337	0.759215	0.71396	0.799322	0.651962	0.610723	0.691042	0.595146	0.540012	0.64798	0.706565	0.658522	0.750412	0.78836	0.753052	0.819827	0.746126	0.696376	0.79018	0.828003	0.791988	0.858893
57	0.702875	0.667291	0.736158	0.636418	0.590778	0.679728	0.765217	0.729034	0.797908	0.713837	0.672717	0.751698	0.663664	0.608155	0.714995	0.760323	0.714429	0.800896	0.652586	0.611394	0.691614	0.59793	0.542432	0.651027	0.705085	0.656268	0.749614	0.791277	0.756117	0.822558	0.751066	0.701358	0.79492	0.829075	0.792689	0.860202
58	0.703253	0.668479	0.73582	0.637661	0.593253	0.679837	0.764774	0.729365	0.79684	0.716206	0.675411	0.753744	0.667598	0.612433	0.71852	0.760945	0.714982	0.801554	0.651656	0.611209	0.69003	0.598565	0.543662	0.651102	0.702665	0.653932	0.747188	0.79338	0.758646	0.824274	0.754669	0.705519	0.797964	0.829798	0.793491	0.860841
59	0.702621	0.669172	0.734032	0.637882	0.595255	0.678444	0.763378	0.729123	0.794523	0.717769	0.677388	0.754923	0.670218	0.615787	0.720438	0.761222	0.715548	0.801595	0.649487	0.610235	0.686815	0.597447	0.54387	0.648796	0.69953	0.651551	0.743503	0.794845	0.760593	0.825322	0.757192	0.708895	0.79974	0.830274	0.794325	0.861038
60	0.701234	0.669354	0.731273	0.637348	0.596774	0.676055	0.761254	0.728321	0.791338	0.718735	0.678566	0.755693	0.671812	0.618201	0.721289	0.761289	0.716015	0.801348	0.64639	0.608479	0.682545	0.594963	0.543155	0.644739	0.695908	0.649104	0.73898	0.795841	0.761888	0.826058	0.758879	0.711474	0.800676	0.830603	0.795083	0.861042
61	0.699342	0.668969	0.728062	0.636322	0.597758	0.673209	0.758623	0.726943	0.787701	0.719315	0.67888	0.756484	0.672664	0.619649	0.721609	0.761283	0.71626	0.801145	0.642677	0.605917	0.677831	0.591498	0.541583	0.639594	0.69203	0.646536	0.734077	0.796533	0.762474	0.826817	0.759958	0.713232	0.801193	0.830886	0.795651	0.861106
62	0.697201	0.667953	0.724933	0.635067	0.59815	0.67046	0.755712	0.724971	0.784041	0.719711	0.678351	0.757653	0.673048	0.620141	0.721891	0.761339	0.716202	0.80129	0.638666	0.602548	0.673282	0.587437	0.539215	0.634037	0.688134	0.643795	0.729275	0.797081	0.76236	0.827874	0.760656	0.714175	0.801677	0.831222	0.795949	0.861459
63	0.695067	0.666304	0.722383	0.633848	0.597943	0.668326	0.752755	0.722437	0.780767	0.720128	0.677127	0.759438	0.673241	0.619783	0.722548	0.761595	0.715838	0.802021	0.63468	0.598463	0.669434	0.583171	0.536152	0.628725	0.684465	0.64087	0.725038	0.797643	0.761656	0.829414	0.761192	0.714385	0.802449	0.831709	0.795963	0.862276
64	0.693201	0.664156	0.72079	0.632932	0.597252	0.667213	0.749994	0.719481	0.77821	0.72077	0.675501	0.761949	0.673515	0.61881	0.723872	0.762184	0.715281	0.803484	0.631047	0.593925	0.666681	0.579096	0.5326	0.62423	0.681274	0.637852	0.72176	0.798379	0.760593	0.831522	0.761785	0.714051	0.803741	0.832446	0.795777	0.863658
65	0.691869	0.66184	0.720358	0.632585	0.596372	0.667362	0.747674	0.716392	0.776582	0.721838	0.673884	0.765197	0.674143	0.617603	0.726031	0.763242	0.714763	0.805721	0.628103	0.589388	0.665241	0.57561	0.528919	0.620989	0.678815	0.634971	0.719716	0.799443	0.759502	0.834199	0.762652	0.713484	0.805681	0.833526	0.795573	0.865623
66	0.691336	0.659861	0.721129	0.633074	0.595772	0.668848	0.746051	0.713603	0.775976	0.72353	0.672757	0.769128	0.675397	0.616663	0.729086	0.764897	0.714611	0.808694	0.626182	0.58546	0.665192	0.573116	0.525638	0.619284	0.677344	0.632612	0.719049	0.800988	0.758773	0.837398	0.764008	0.713097	0.808312	0.835043	0.795613	0.868126
67	0.691866	0.658817	0.723059	0.634663	0.596037	0.671631	0.745376	0.711642	0.776403	0.726041	0.672625	0.773673	0.677546	0.616562	0.73303	0.767275	0.715214	0.812316	0.625623	0.582825	0.666543	0.572016	0.523417	0.619264	0.677117	0.631279	0.719786	0.80316	0.758822	0.841054	0.766061	0.713371	0.811623	0.837082	0.796208	0.871085
68	0.693667	0.659245	0.726057	0.63756	0.597707	0.675607	0.745853	0.710997	0.777818	0.729516	0.673914	0.77875	0.680799	0.617817	0.737806	0.770467	0.716924	0.816475	0.626694	0.582081	0.669251	0.572636	0.522891	0.620954	0.678333	0.631465	0.721865	0.806067	0.759996	0.845097	0.768973	0.71474	0.815557	0.839704	0.797637	0.874403
69	0.696738	0.661315	0.729969	0.641761	0.600971	0.680597	0.747488	0.711835	0.780092	0.733942	0.676732	0.784254	0.685154	0.620601	0.743267	0.774449	0.719861	0.821045	0.629402	0.583404	0.673167	0.574996	0.524288	0.624173	0.680987	0.633359	0.725113	0.80969	0.762386	0.849437	0.772734	0.717347	0.81999	0.842886	0.799993	0.877983
70	0.701018	0.665034	0.73468	0.647206	0.605855	0.686464	0.750232	0.714172	0.783124	0.739256	0.68106	0.790106	0.690553	0.624934	0.749296	0.779167	0.72403	0.825936	0.633684	0.586795	0.678171	0.579035	0.527655	0.628759	0.685017	0.636995	0.729385	0.813975	0.76597	0.85401	0.777286	0.721209	0.824824	0.846581	0.803278	0.881755
71	0.70644	0.670331	0.740127	0.65383	0.612306	0.693135	0.754026	0.717956	0.786852	0.745394	0.686825	0.796259	0.69693	0.63078	0.755816	0.78456	0.729384	0.831091	0.639467	0.592184	0.684191	0.584689	0.53297	0.634607	0.690353	0.642337	0.734586	0.818862	0.77068	0.858776	0.782569	0.726282	0.829991	0.85074	0.807449	0.885676
72	0.712927	0.677079	0.746285	0.661558	0.620209	0.700578	0.758803	0.72308	0.791247	0.752284	0.693916	0.802687	0.704216	0.638053	0.762781	0.790564	0.735833	0.836475	0.646668	0.599448	0.69119	0.591884	0.540146	0.641663	0.696911	0.649282	0.740656	0.824289	0.776414	0.863712	0.788515	0.732482	0.835448	0.85531	0.812427	0.88972
73	0.720395	0.6851	0.75316	0.670311	0.629397	0.708798	0.764487	0.729389	0.796304	0.75985	0.702185	0.809381	0.712334	0.646625	0.770167	0.797113	0.743254	0.842073	0.655199	0.608409	0.699163	0.600542	0.549043	0.649909	0.704604	0.657679	0.747566	0.830188	0.783041	0.868806	0.795054	0.739686	0.841174	0.860237	0.818107	0.893875
74	0.728756	0.694167	0.760782	0.680004	0.639654	0.717828	0.770998	0.736686	0.802041	0.768014	0.711459	0.816345	0.721203	0.656336	0.777969	0.804136	0.751493	0.847883	0.664959	0.618844	0.708127	0.610574	0.559471	0.659358	0.713333	0.667323	0.755314	0.836493	0.790409	0.874059	0.802112	0.747745	0.847156	0.865466	0.824365	0.898138
75	0.737914	0.704021	0.769199	0.690543	0.650724	0.727723	0.778249	0.744739	0.80849	0.776692	0.721538	0.823593	0.730739	0.666993	0.786194	0.811561	0.760377	0.853913	0.67584	0.630484	0.718117	0.621883	0.571188	0.670047	0.722994	0.677973	0.763912	0.843134	0.798348	0.879475	0.809613	0.756487	0.853395	0.870941	0.831061	0.902512
76	0.747767	0.714372	0.778468	0.701831	0.662321	0.738543	0.786147	0.753297	0.815692	0.7858	0.732203	0.831144	0.740852	0.678378	0.79486	0.819317	0.769715	0.860176	0.687723	0.643026	0.72918	0.634363	0.583914	0.682026	0.733472	0.689354	0.773385	0.850041	0.80668	0.885063	0.817479	0.765722	0.859894	0.876608	0.838049	0.907005
77	0.75821	0.724934	0.788633	0.713764	0.674157	0.750339	0.794597	0.762103	0.82368	0.795253	0.743226	0.839021	0.751449	0.690258	0.803984	0.827331	0.779309	0.866691	0.70048	0.656143	0.741354	0.647897	0.597347	0.695337	0.744651	0.701175	0.783752	0.857147	0.815225	0.890832	0.825634	0.775258	0.86666	0.882412	0.845179	0.911626
78	0.769133	0.735449	0.799697	0.726232	0.685969	0.763116	0.803503	0.770922	0.832457	0.804963	0.754377	0.847241	0.762436	0.702391	0.813581	0.835531	0.788962	0.873472	0.713978	0.669521	0.754647	0.662355	0.611181	0.70999	0.756405	0.713156	0.795008	0.864384	0.823807	0.896788	0.833999	0.784901	0.873694	0.888301	0.852308	0.916383
79	0.780428	0.74572	0.811596	0.739125	0.697549	0.776815	0.812765	0.779567	0.841976	0.814847	0.765438	0.855809	0.773717	0.714543	0.823652	0.843847	0.798488	0.880523	0.728075	0.682882	0.769006	0.677601	0.625146	0.725934	0.76861	0.725049	0.807106	0.871689	0.832264	0.902927	0.8425	0.79447	0.880987	0.894227	0.859306	0.921274
80	0.791983	0.755631	0.824186	0.752329	0.708766	0.791296	0.822285	0.787916	0.85213	0.824821	0.776217	0.864709	0.785198	0.726504	0.834171	0.852211	0.807727	0.887832	0.742623	0.696019	0.784297	0.693488	0.639028	0.743035	0.781137	0.736669	0.819932	0.878999	0.840462	0.909233	0.851064	0.803809	0.888516	0.900142	0.866061	0.926289
81	0.80369	0.765138	0.837259	0.76573	0.719559	0.806346	0.831968	0.795913	0.862752	0.834807	0.786563	0.873894	0.796785	0.7381	0.84508	0.860561	0.816553	0.895364	0.757475	0.708804	0.800303	0.709862	0.652687	0.761069	0.793859	0.747898	0.833309	0.886259	0.848293	0.915669	0.859622	0.812794	0.896233	0.906004	0.87249	0.931402
82	0.815442	0.774248	0.85057	0.779216	0.729923	0.82171	0.841721	0.803552	0.873639	0.844729	0.796373	0.883284	0.808387	0.749208	0.856281	0.868836	0.82488	0.903055	0.772481	0.721181	0.816742	0.726564	0.666048	0.779741	0.806653	0.758685	0.847008	0.893417	0.855689	0.922179	0.868111	0.821338	0.904069	0.911775	0.878535	0.936575
83	0.827139	0.782994	0.863865	0.792677	0.739885	0.837114	0.851456	0.810859	0.884579	0.854517	0.805595	0.892766	0.819918	0.759752	0.867642	0.876983	0.832668	0.910818	0.787498	0.733144	0.833298	0.743437	0.679086	0.798709	0.819398	0.769025	0.860775	0.900426	0.862616	0.928691	0.87647	0.829395	0.911935	0.917419	0.88417	0.941753
84	0.838688	0.791418	0.876911	0.80601	0.749483	0.852296	0.861092	0.81787	0.895369	0.864108	0.81422	0.902208	0.831298	0.769705	0.879007	0.884951	0.839911	0.918549	0.802386	0.744714	0.849659	0.760321	0.691803	0.817621	0.831985	0.778942	0.874354	0.907245	0.869069	0.935121	0.884647	0.836949	0.91973	0.922907	0.889395	0.946872
85	0.850001	0.799557	0.889505	0.819118	0.758757	0.867023	0.870555	0.824621	0.905832	0.873445	0.82227	0.911472	0.842452	0.779075	0.89021	0.892699	0.846632	0.926136	0.817015	0.755918	0.865539	0.777064	0.704216	0.836144	0.844312	0.78847	0.887515	0.913839	0.875069	0.941383	0.892595	0.844013	0.927348	0.928213	0.894224	0.951867
86	0.861003	0.807442	0.901484	0.831913	0.76774	0.881101	0.879778	0.831144	0.915823	0.882481	0.829788	0.920425	0.853314	0.787894	0.901089	0.900189	0.85287	0.933476	0.831267	0.766784	0.880695	0.793521	0.716342	0.853981	0.856286	0.797642	0.900064	0.920178	0.880646	0.947399	0.900273	0.850616	0.934691	0.933315	0.898688	0.956677
87	0.871628	0.815094	0.912728	0.844318	0.776459	0.894379	0.888704	0.837463	0.925233	0.891172	0.836824	0.928955	0.863826	0.796204	0.911504	0.90739	0.858673	0.940478	0.845039	0.777332	0.89494	0.809562	0.728194	0.87089	0.867829	0.806489	0.911851	0.926239	0.885839	0.953099	0.907649	0.856795	0.941674	0.938197	0.90282	0.961248
88	0.881819	0.822528	0.923152	0.856263	0.784931	0.906748	0.897285	0.843596	0.933986	0.899486	0.843429	0.936972	0.873939	0.804054	0.921337	0.914277	0.864089	0.947067	0.858241	0.787576	0.90814	0.825068	0.739779	0.886685	0.878877	0.815034	0.922772	0.932005	0.89069	0.958434	0.914696	0.862591	0.948229	0.942846	0.906657	0.965537
89	0.891531	0.829753	0.93271	0.867695	0.793169	0.918139	0.905482	0.849556	0.942036	0.907396	0.849651	0.944414	0.883612	0.811489	0.930505	0.920832	0.869162	0.953195	0.870803	0.797523	0.920214	0.839939	0.751097	0.90124	0.889376	0.823292	0.932765	0.937463	0.895234	0.963367	0.921394	0.868042	0.954311	0.947253	0.910231	0.969517
90	0.900732	0.836775	0.941384	0.878569	0.801183	0.928521	0.913264	0.855349	0.949365	0.914884	0.855533	0.951242	0.892815	0.818551	0.938951	0.927041	0.873934	0.95883	0.882668	0.807175	0.931127	0.854093	0.762146	0.914484	0.899288	0.831275	0.941804	0.942605	0.899506	0.96788	0.927729	0.873185	0.959891	0.951413	0.913575	0.973171
91	0.909397	0.843595	0.949183	0.888852	0.808976	0.937892	0.920612	0.860979	0.955974	0.92194	0.86111	0.957444	0.901525	0.825277	0.94665	0.932897	0.878439	0.963959	0.893799	0.81653	0.940882	0.867466	0.772918	0.926396	0.908587	0.838991	0.949897	0.947429	0.903536	0.971969	0.933693	0.87805	0.96496	0.955324	0.916714	0.976494
92	0.917514	0.850213	0.956136	0.898522	0.816551	0.946276	0.927512	0.86645	0.961883	0.928556	0.866414	0.963024	0.909729	0.831697	0.9536	0.938396	0.882706	0.968586	0.904174	0.825585	0.949517	0.880013	0.783403	0.936997	0.917259	0.846444	0.957073	0.951935	0.907348	0.975642	0.939283	0.882666	0.969524	0.958988	0.919672	0.97949
93	0.925078	0.85663	0.962286	0.90757	0.823909	0.953717	0.933959	0.871761	0.967127	0.934735	0.87147	0.968003	0.917418	0.837838	0.959818	0.94354	0.886761	0.972725	0.913784	0.834334	0.957091	0.891709	0.793592	0.94634	0.925301	0.853636	0.963382	0.956129	0.910963	0.978914	0.944501	0.887056	0.973598	0.962407	0.922469	0.98217
94	0.932092	0.862842	0.967688	0.915993	0.831048	0.960272	0.939953	0.876913	0.971747	0.940482	0.876299	0.972411	0.924595	0.843722	0.965336	0.948334	0.890624	0.976401	0.922634	0.842772	0.96368	0.902544	0.803473	0.9545	0.93272	0.860569	0.968885	0.960017	0.9144	0.981808	0.949352	0.891239	0.977208	0.965587	0.925121	0.98455
95	0.938567	0.868849	0.972401	0.923799	0.837968	0.966008	0.945502	0.881903	0.975791	0.945806	0.880918	0.976288	0.931265	0.849368	0.970198	0.952786	0.894313	0.979645	0.930741	0.850895	0.969369	0.912521	0.813035	0.961572	0.93953	0.867243	0.973652	0.96361	0.917673	0.984352	0.953847	0.895232	0.980387	0.968536	0.927642	0.986651
96	0.944519	0.874649	0.97649	0.931001	0.844669	0.970997	0.950617	0.886732	0.979311	0.950722	0.885343	0.979677	0.937441	0.85479	0.974454	0.956908	0.897843	0.982489	0.93813	0.858699	0.974248	0.921659	0.822269	0.967655	0.945753	0.873659	0.977755	0.966919	0.920796	0.986575	0.957997	0.89905	0.983168	0.971263	0.930045	0.988495
97	0.949968	0.880241	0.980019	0.937618	0.851148	0.975314	0.955315	0.891397	0.982359	0.955245	0.889585	0.982622	0.943138	0.860002	0.978158	0.960711	0.901225	0.98497	0.944832	0.866182	0.978409	0.929986	0.831167	0.972855	0.951414	0.879817	0.981267	0.969958	0.923779	0.988507	0.961816	0.902704	0.985588	0.973777	0.93234	0.990106
98	0.954939	0.885625	0.983051	0.943677	0.857405	0.97903	0.959614	0.8959	0.984986	0.959395	0.893656	0.98517	0.948375	0.865014	0.981365	0.964211	0.904471	0.987124	0.950886	0.873341	0.981938	0.937539	0.839722	0.977274	0.956546	0.88572	0.984257	0.972742	0.926631	0.99018	0.965321	0.906206	0.987684	0.976089	0.934536	0.991506
99	0.959459	0.8908	0.985644	0.949203	0.86344	0.982215	0.963535	0.900238	0.98724	0.96319	0.897565	0.987364	0.953175	0.869837	0.984129	0.967423	0.907589	0.988986	0.956334	0.880178	0.984916	0.944359	0.84793	0.981011	0.96118	0.891369	0.986792	0.975285	0.929362	0.991622	0.968528	0.909563	0.989492	0.978211	0.936639	0.992719
100	0.963555	0.895768	0.987855	0.954229	0.869254	0.984934	0.967099	0.904413	0.989168	0.966653	0.901319	0.989247	0.957562	0.874478	0.986501	0.970364	0.910588	0.99059	0.961217	0.886694	0.987421	0.950495	0.855789	0.984157	0.965351	0.896767	0.988933	0.977602	0.931976	0.99286	0.971456	0.912785	0.991045	0.980153	0.938657	0.993765

## Sheet: INDEX
	BELGIUM									BRUSSELS									FLANDERS									WALLONIA
	Both			Male			Female			Both			Male			Female			Both			Male			Female			Both			Male			Female
Age	mean	lwr	upr	mean	lwr	upr	mean	lwr	upr	mean	lwr	upr	mean	lwr	upr	mean	lwr	upr	mean	lwr	upr	mean	lwr	upr	mean	lwr	upr	mean	lwr	upr	mean	lwr	upr	mean	lwr	upr
ALL	0.843146	0.835857	0.850436	0.866674	0.856464	0.876885	0.821076	0.81195	0.830202	0.839243	0.827388	0.851097	0.862532	0.849266	0.875798	0.817559	0.804114	0.831004	0.868493	0.859595	0.877392	0.891519	0.880051	0.902987	0.846546	0.836285	0.856806	0.798384	0.783334	0.813434	0.821891	0.805326	0.838456	0.776917	0.760869	0.792966
15	0.905624	0.88397	0.927278	0.92291	0.898414	0.947405	0.888314	0.867757	0.908871	0.904373	0.880177	0.92857	0.928587	0.902658	0.954517	0.882392	0.855864	0.90892	0.925074	0.902484	0.947664	0.936806	0.911146	0.962465	0.912479	0.890799	0.934159	0.875895	0.846495	0.905294	0.900375	0.864751	0.935999	0.852547	0.822896	0.882198
16	0.905488	0.885264	0.925711	0.92231	0.899078	0.945541	0.888641	0.869483	0.9078	0.904131	0.881096	0.927166	0.92788	0.902972	0.952788	0.882603	0.857144	0.908061	0.924833	0.903529	0.946137	0.9361	0.911542	0.960657	0.912691	0.892304	0.933078	0.875652	0.847229	0.904075	0.899667	0.864905	0.934429	0.852757	0.823959	0.881556
17	0.905336	0.886476	0.924195	0.921696	0.899653	0.94374	0.888951	0.871102	0.9068	0.90387	0.881919	0.925821	0.927156	0.903186	0.951125	0.882791	0.858313	0.907269	0.924581	0.904491	0.944672	0.935385	0.911851	0.95892	0.912889	0.893707	0.932071	0.875387	0.847866	0.902908	0.89894	0.864973	0.932906	0.852943	0.824907	0.880979
18	0.905152	0.887572	0.922732	0.921057	0.900111	0.942003	0.889223	0.872573	0.905874	0.903569	0.882614	0.924524	0.926398	0.903275	0.94952	0.882935	0.85934	0.906531	0.924307	0.905345	0.94327	0.934654	0.912053	0.957256	0.913061	0.894979	0.931142	0.875077	0.848378	0.901777	0.898173	0.864932	0.931414	0.853078	0.825711	0.880446
19	0.904921	0.888518	0.921323	0.920379	0.900427	0.94033	0.88944	0.873855	0.905025	0.903211	0.883156	0.923266	0.925589	0.903217	0.94796	0.883013	0.860195	0.90583	0.923999	0.906066	0.941933	0.933898	0.912132	0.955665	0.913191	0.896088	0.930293	0.8747	0.84874	0.90066	0.897348	0.864763	0.929932	0.853139	0.826344	0.879933
20	0.904626	0.889283	0.91997	0.919648	0.900579	0.938717	0.889583	0.87491	0.904257	0.902775	0.883519	0.92203	0.924712	0.902994	0.946431	0.883001	0.860852	0.905149	0.923647	0.906632	0.940662	0.933109	0.912074	0.954144	0.913266	0.897007	0.929524	0.874234	0.848932	0.899535	0.896444	0.86445	0.928438	0.8531	0.826786	0.879414
21	0.904253	0.889835	0.918671	0.918852	0.900545	0.937159	0.889634	0.875702	0.903566	0.902242	0.883683	0.920801	0.923751	0.90259	0.944913	0.882878	0.861289	0.904466	0.923239	0.907024	0.939454	0.932277	0.911869	0.952686	0.913272	0.897712	0.928833	0.873655	0.848934	0.898376	0.895442	0.863976	0.926908	0.852936	0.827015	0.878857
22	0.903785	0.890147	0.917422	0.917978	0.90031	0.935646	0.889574	0.876202	0.902946	0.901592	0.88363	0.919555	0.922689	0.901994	0.943384	0.882621	0.861488	0.903753	0.922764	0.907226	0.938301	0.931396	0.911511	0.951282	0.913197	0.898185	0.928209	0.872942	0.848731	0.897152	0.894323	0.86333	0.925315	0.852622	0.827016	0.878228
23	0.903205	0.890198	0.916213	0.917013	0.899862	0.934163	0.889385	0.876392	0.902378	0.900807	0.883347	0.918266	0.921508	0.901198	0.941818	0.882208	0.861435	0.902981	0.92221	0.907229	0.937191	0.930456	0.910997	0.949916	0.913025	0.898415	0.927635	0.872072	0.848311	0.895832	0.893066	0.862501	0.923631	0.852134	0.826777	0.877491
24	0.9025	0.889973	0.915026	0.915943	0.899197	0.932689	0.889048	0.876263	0.901834	0.899866	0.882827	0.916905	0.920192	0.900199	0.940185	0.881618	0.86112	0.902115	0.921567	0.907028	0.936107	0.92945	0.91033	0.94857	0.912744	0.898399	0.927089	0.871023	0.847663	0.894382	0.891653	0.86148	0.921826	0.851446	0.826285	0.876608
25	0.901651	0.889467	0.913836	0.914756	0.898314	0.931197	0.888545	0.875818	0.901273	0.898751	0.882065	0.915438	0.918724	0.898994	0.938454	0.880826	0.860534	0.901118	0.920824	0.906624	0.935024	0.928368	0.909515	0.947221	0.912339	0.89814	0.926538	0.869772	0.846779	0.892765	0.890064	0.860259	0.919868	0.850534	0.825531	0.875536
26	0.900645	0.888681	0.912609	0.913438	0.897217	0.929659	0.887858	0.875067	0.900648	0.897442	0.881056	0.913828	0.917087	0.897583	0.93659	0.879813	0.859673	0.899952	0.919969	0.906024	0.933915	0.927203	0.90856	0.945846	0.911798	0.897649	0.925946	0.868297	0.845651	0.890942	0.888278	0.858832	0.917725	0.849372	0.824508	0.874236
27	0.899465	0.887626	0.911303	0.911977	0.895913	0.928041	0.886967	0.874028	0.899907	0.89592	0.879801	0.912039	0.915263	0.895966	0.93456	0.878554	0.85853	0.898578	0.918991	0.905237	0.932746	0.925946	0.907475	0.944417	0.911105	0.896938	0.925272	0.866575	0.844274	0.888877	0.886278	0.857191	0.915364	0.847936	0.823205	0.872666
28	0.898095	0.886314	0.909875	0.91036	0.894411	0.926308	0.885855	0.872715	0.898995	0.894164	0.878298	0.910031	0.913237	0.894145	0.93233	0.877028	0.857101	0.896955	0.91788	0.904276	0.931483	0.924589	0.906272	0.942906	0.910248	0.896021	0.924475	0.864585	0.84264	0.886531	0.884042	0.855328	0.912755	0.8462	0.821615	0.870785
29	0.896519	0.884761	0.908277	0.908572	0.892722	0.924423	0.884503	0.871144	0.897862	0.892157	0.876545	0.907769	0.910991	0.892116	0.929866	0.875213	0.855378	0.895047	0.916623	0.903154	0.930092	0.923123	0.90496	0.941286	0.909213	0.894912	0.923514	0.862304	0.84074	0.883867	0.881551	0.853236	0.909865	0.84414	0.819725	0.868554
30	0.894721	0.882978	0.906465	0.906603	0.890852	0.922353	0.882893	0.869326	0.896459	0.889878	0.874536	0.90522	0.908509	0.889878	0.927139	0.873085	0.853352	0.892819	0.915209	0.901882	0.928537	0.92154	0.903551	0.93953	0.907986	0.89362	0.922351	0.859708	0.838565	0.880852	0.878786	0.850905	0.906667	0.84173	0.817522	0.865938
31	0.892687	0.880977	0.904397	0.904437	0.88881	0.920064	0.881005	0.867267	0.894743	0.887308	0.872264	0.902352	0.905772	0.887423	0.924122	0.870624	0.85101	0.890239	0.913629	0.90047	0.926788	0.919832	0.902051	0.937613	0.906553	0.892154	0.920952	0.856777	0.8361	0.877454	0.875727	0.84832	0.903134	0.838946	0.81499	0.862902
32	0.890399	0.878763	0.902035	0.902063	0.886599	0.917526	0.878822	0.864969	0.892675	0.884427	0.869713	0.899142	0.902766	0.88474	0.920792	0.867807	0.848334	0.88728	0.911869	0.898924	0.924814	0.917991	0.900468	0.935514	0.904901	0.890517	0.919285	0.853487	0.833327	0.873647	0.872355	0.845466	0.899244	0.835763	0.812109	0.859418
33	0.887842	0.876337	0.899348	0.899467	0.884219	0.914715	0.876326	0.862428	0.890223	0.881217	0.86686	0.895574	0.899472	0.88181	0.917133	0.864611	0.845299	0.883923	0.90992	0.897247	0.922593	0.916007	0.898803	0.933212	0.903016	0.888706	0.917325	0.849817	0.830222	0.869411	0.868649	0.842319	0.894979	0.832156	0.808851	0.855462
34	0.885001	0.873693	0.896308	0.896636	0.881665	0.911608	0.873497	0.859635	0.887358	0.877658	0.863674	0.891642	0.895873	0.878609	0.913137	0.861014	0.841873	0.880155	0.907769	0.895434	0.920105	0.913874	0.897054	0.930693	0.900884	0.886714	0.915053	0.845743	0.826751	0.864734	0.864591	0.838853	0.890329	0.8281	0.805183	0.851017
35	0.881859	0.870818	0.892899	0.893558	0.878926	0.90819	0.870317	0.856573	0.884061	0.87373	0.860107	0.887352	0.891953	0.8751	0.908807	0.856995	0.838017	0.875973	0.905407	0.893475	0.917339	0.911581	0.895215	0.927948	0.898491	0.884527	0.912455	0.841243	0.82287	0.859616	0.860161	0.83503	0.885292	0.82357	0.801065	0.846075
36	0.8784	0.867688	0.889112	0.890218	0.875981	0.904456	0.866768	0.853218	0.880318	0.869414	0.856096	0.882731	0.887696	0.871232	0.904159	0.85253	0.833675	0.871384	0.902821	0.891348	0.914295	0.909122	0.893269	0.924975	0.895825	0.88212	0.909529	0.836295	0.818517	0.854073	0.855339	0.830801	0.879877	0.818541	0.796441	0.84064
37	0.874625	0.864277	0.884972	0.886619	0.872813	0.900426	0.862847	0.849548	0.876147	0.864709	0.851572	0.877846	0.883101	0.866956	0.899246	0.847617	0.828803	0.86643	0.900011	0.889024	0.910999	0.906497	0.891199	0.921796	0.892881	0.879467	0.906296	0.830898	0.813632	0.848164	0.850126	0.826125	0.874128	0.813009	0.791264	0.834755
38	0.870591	0.860592	0.880591	0.88282	0.869441	0.896198	0.858615	0.845583	0.871646	0.85969	0.846527	0.872853	0.878244	0.862273	0.894216	0.842331	0.823422	0.86124	0.897021	0.88649	0.907552	0.903749	0.889004	0.918495	0.889705	0.876563	0.902846	0.825139	0.808217	0.84206	0.844608	0.821025	0.868192	0.807062	0.785559	0.828566
39	0.866375	0.856651	0.8761	0.878893	0.865894	0.891892	0.854145	0.841355	0.866935	0.854449	0.840988	0.86791	0.873219	0.857214	0.889223	0.836768	0.817584	0.855953	0.893903	0.883734	0.904072	0.90093	0.886688	0.915172	0.886348	0.873416	0.899281	0.819123	0.802302	0.835944	0.83889	0.81555	0.86223	0.800807	0.779377	0.822238
40	0.862051	0.852474	0.871628	0.874912	0.862201	0.887623	0.849515	0.836901	0.862129	0.84908	0.835023	0.863137	0.868116	0.851831	0.884402	0.831024	0.811362	0.850685	0.890711	0.88075	0.900672	0.898091	0.884256	0.911926	0.882867	0.870037	0.895696	0.812959	0.795943	0.829974	0.833078	0.809767	0.856389	0.794353	0.772788	0.815917
41	0.857693	0.848099	0.867288	0.870951	0.858405	0.883497	0.844799	0.832266	0.857332	0.843675	0.828743	0.858607	0.863031	0.84621	0.879851	0.825192	0.804853	0.845531	0.887498	0.877549	0.897448	0.895284	0.881722	0.908847	0.879314	0.866452	0.892176	0.806753	0.789236	0.82427	0.827277	0.80376	0.850794	0.787806	0.765884	0.809728
42	0.853377	0.843588	0.863165	0.867082	0.854558	0.879605	0.840074	0.82751	0.852638	0.838327	0.822293	0.854361	0.858055	0.84047	0.87564	0.819369	0.798175	0.840563	0.884319	0.874173	0.894465	0.892562	0.879116	0.906008	0.875744	0.862706	0.888783	0.800614	0.782317	0.818911	0.821594	0.797643	0.845546	0.781275	0.758785	0.803765
43	0.849176	0.839031	0.859321	0.863379	0.850736	0.876022	0.835415	0.822708	0.848122	0.83313	0.81584	0.850421	0.853282	0.834753	0.871811	0.813649	0.791465	0.835833	0.881226	0.870694	0.891759	0.889976	0.876487	0.903466	0.872212	0.858862	0.885562	0.794648	0.775352	0.813944	0.816134	0.791551	0.840718	0.774869	0.751635	0.798103
44	0.845166	0.834542	0.855789	0.859915	0.847032	0.872799	0.830897	0.817953	0.843841	0.828176	0.809552	0.8468	0.848804	0.829217	0.86839	0.808127	0.784871	0.831384	0.878274	0.867212	0.889335	0.887579	0.873904	0.901254	0.868771	0.855002	0.882541	0.788963	0.768528	0.809399	0.811004	0.785642	0.836365	0.768695	0.744595	0.792795
45	0.841421	0.830249	0.852593	0.856764	0.843554	0.869975	0.826596	0.813351	0.839842	0.823558	0.803601	0.843516	0.844714	0.824028	0.8654	0.8029	0.778548	0.827252	0.875515	0.863843	0.887187	0.885422	0.871454	0.899389	0.865476	0.851222	0.879731	0.783667	0.762036	0.805297	0.806308	0.780084	0.832531	0.762861	0.737835	0.787887
46	0.838016	0.826284	0.849748	0.853999	0.840421	0.867578	0.822588	0.809016	0.83616	0.819369	0.798149	0.84059	0.841105	0.819347	0.862863	0.798061	0.772651	0.823472	0.873003	0.860703	0.885304	0.883557	0.869235	0.897878	0.862381	0.847622	0.87714	0.778865	0.756066	0.801665	0.802152	0.775053	0.829252	0.757476	0.731533	0.783419
47	0.835025	0.822778	0.847272	0.851694	0.837755	0.865632	0.818948	0.805067	0.83283	0.815703	0.793353	0.838052	0.838071	0.815336	0.860807	0.793707	0.767333	0.820081	0.870792	0.857909	0.883676	0.882036	0.867352	0.896719	0.85954	0.844305	0.874775	0.774667	0.750802	0.798532	0.798643	0.770723	0.826563	0.752647	0.725863	0.779431
48	0.832524	0.819858	0.84519	0.84992	0.835679	0.864162	0.815752	0.801621	0.829884	0.812651	0.789365	0.835937	0.835704	0.812146	0.859263	0.789932	0.762744	0.81712	0.868936	0.855569	0.882302	0.880911	0.865907	0.895914	0.857007	0.841371	0.872643	0.771179	0.746423	0.795935	0.795886	0.767269	0.824504	0.748482	0.720996	0.775967
49	0.830587	0.817643	0.84353	0.848753	0.834309	0.863197	0.813076	0.798792	0.827359	0.810307	0.78633	0.834284	0.834097	0.809924	0.85827	0.786832	0.759027	0.814636	0.867487	0.853785	0.881188	0.880234	0.864999	0.895469	0.854837	0.838915	0.870758	0.768508	0.743097	0.79392	0.793987	0.764857	0.823118	0.74509	0.7171	0.773079
50	0.829288	0.816246	0.84233	0.848265	0.833755	0.862775	0.810994	0.796687	0.825301	0.808764	0.784387	0.833141	0.833343	0.808809	0.857877	0.784501	0.756321	0.81268	0.866499	0.85265	0.880348	0.880057	0.864716	0.895398	0.853083	0.837025	0.869141	0.766763	0.740986	0.792539	0.793052	0.763647	0.822457	0.742578	0.714331	0.770824
51	0.828673	0.81573	0.841616	0.848498	0.834079	0.862918	0.809555	0.795364	0.823746	0.80808	0.78362	0.83254	0.833498	0.808883	0.858112	0.783	0.75471	0.811291	0.866003	0.852214	0.879792	0.880407	0.865105	0.89571	0.851779	0.835746	0.867811	0.766009	0.740192	0.791827	0.793146	0.763741	0.822551	0.741016	0.712789	0.769242
52	0.828668	0.815992	0.841343	0.849374	0.835173	0.863574	0.808693	0.794723	0.822663	0.808169	0.783914	0.832424	0.83447	0.810027	0.858913	0.782254	0.75409	0.810417	0.865935	0.852387	0.879483	0.881216	0.866073	0.89636	0.850869	0.834994	0.866743	0.766156	0.740596	0.791717	0.794169	0.765017	0.823321	0.74032	0.712364	0.768277
53	0.829169	0.816882	0.841456	0.850779	0.836883	0.864675	0.808315	0.794619	0.82201	0.808913	0.785106	0.83272	0.836131	0.812065	0.860197	0.782149	0.754304	0.809994	0.86621	0.853036	0.879383	0.88239	0.86748	0.897299	0.850276	0.834643	0.865909	0.767071	0.74202	0.792122	0.795983	0.767298	0.824668	0.740369	0.712886	0.767852
54	0.830073	0.818241	0.841906	0.852604	0.839045	0.866164	0.808326	0.7949	0.821752	0.810191	0.787023	0.833359	0.838352	0.814816	0.861888	0.782575	0.755192	0.809959	0.86674	0.854023	0.879458	0.883834	0.869185	0.898482	0.849925	0.834565	0.865286	0.768622	0.744282	0.792963	0.798448	0.770396	0.826501	0.741039	0.71418	0.767898
55	0.831277	0.819905	0.842649	0.854738	0.841493	0.867982	0.808634	0.795412	0.821855	0.811884	0.789492	0.834276	0.841005	0.818096	0.863914	0.783422	0.756593	0.81025	0.86744	0.8552	0.87968	0.885454	0.871039	0.899869	0.849739	0.834628	0.864851	0.770678	0.747194	0.794162	0.801425	0.774121	0.828729	0.742209	0.716067	0.768351
56	0.832677	0.821709	0.843645	0.857068	0.844065	0.870072	0.809144	0.79601	0.822278	0.813872	0.792337	0.835406	0.843961	0.82172	0.866203	0.784576	0.758344	0.810808	0.868223	0.856422	0.880025	0.887158	0.872898	0.901419	0.849642	0.834704	0.86458	0.773106	0.750564	0.795647	0.804774	0.778279	0.831269	0.743757	0.718366	0.769148
57	0.834171	0.823491	0.84485	0.859486	0.846602	0.872369	0.809763	0.796559	0.822968	0.816034	0.795382	0.836687	0.847092	0.8255	0.868685	0.785928	0.760286	0.811571	0.869003	0.85754	0.880466	0.888852	0.874623	0.90308	0.849556	0.834674	0.864439	0.775773	0.7542	0.797347	0.808356	0.782679	0.834033	0.745559	0.720894	0.770225
58	0.835653	0.825099	0.846207	0.861878	0.848961	0.874795	0.810398	0.796946	0.82385	0.818253	0.798451	0.838054	0.850269	0.829254	0.871284	0.787366	0.762262	0.812469	0.869693	0.858417	0.88097	0.890441	0.876091	0.90479	0.849406	0.834432	0.86438	0.778549	0.757909	0.79919	0.812031	0.787127	0.836936	0.747495	0.723477	0.771514
59	0.837022	0.826407	0.847637	0.864135	0.851019	0.877251	0.810955	0.797083	0.824827	0.820406	0.801374	0.839438	0.853364	0.83281	0.873918	0.788778	0.764128	0.813428	0.870208	0.858935	0.881481	0.891832	0.877197	0.906466	0.849114	0.833894	0.864335	0.781302	0.761503	0.8011	0.81566	0.791439	0.839882	0.749442	0.725946	0.772938
60	0.838173	0.827317	0.84903	0.866145	0.852675	0.879616	0.81134	0.796902	0.825778	0.822376	0.80399	0.840761	0.856248	0.836005	0.87649	0.790054	0.765749	0.814359	0.870461	0.859002	0.881919	0.892931	0.877855	0.908006	0.848605	0.832992	0.864219	0.783898	0.764802	0.802993	0.819104	0.795438	0.84277	0.751278	0.728149	0.774407
61	0.839004	0.827754	0.850255	0.867798	0.853845	0.88175	0.81146	0.796352	0.826568	0.824041	0.806152	0.84193	0.858792	0.838698	0.878886	0.791082	0.767004	0.815159	0.870365	0.858553	0.882177	0.893644	0.877997	0.909291	0.847802	0.831679	0.863926	0.786206	0.767643	0.80477	0.822223	0.798964	0.845481	0.75288	0.72995	0.77581
62	0.839411	0.827664	0.851157	0.868981	0.85446	0.883503	0.811221	0.79539	0.827052	0.825283	0.807733	0.842833	0.860868	0.840763	0.880973	0.79175	0.767788	0.815712	0.869834	0.857542	0.882126	0.893878	0.877568	0.910188	0.846628	0.829917	0.86334	0.788095	0.769881	0.80631	0.824877	0.801871	0.847884	0.754126	0.731234	0.777019
63	0.83929	0.827002	0.851578	0.869585	0.854455	0.884716	0.81053	0.793976	0.827084	0.825981	0.808623	0.843338	0.862348	0.842095	0.8826	0.791948	0.76801	0.815886	0.868782	0.855936	0.881629	0.893539	0.876518	0.910561	0.845008	0.827677	0.862338	0.789432	0.771394	0.80747	0.826928	0.804029	0.849826	0.754895	0.731905	0.777885
64	0.838538	0.825718	0.851358	0.869499	0.853766	0.885231	0.809292	0.792065	0.82652	0.826015	0.808735	0.843296	0.863103	0.842604	0.883601	0.791564	0.767589	0.815539	0.867123	0.853703	0.880543	0.892533	0.874796	0.910271	0.842863	0.824929	0.860797	0.790085	0.772082	0.808088	0.828235	0.805325	0.851144	0.755064	0.731881	0.778246
65	0.837072	0.823777	0.850368	0.868632	0.852342	0.884922	0.807434	0.789623	0.825245	0.82529	0.808011	0.842569	0.863029	0.842228	0.88383	0.790509	0.766473	0.814544	0.864787	0.850821	0.878754	0.890786	0.872365	0.909206	0.840134	0.821652	0.858616	0.789948	0.771883	0.808012	0.828686	0.805683	0.85169	0.754533	0.73111	0.777957
66	0.834892	0.821194	0.84859	0.866986	0.850199	0.883772	0.804953	0.786664	0.823242	0.823803	0.806482	0.841123	0.862125	0.840997	0.883253	0.788779	0.764685	0.812873	0.861777	0.847309	0.876245	0.888298	0.869242	0.907355	0.836821	0.817863	0.855779	0.789017	0.770831	0.807203	0.828279	0.805128	0.85143	0.753301	0.729624	0.776977
67	0.832018	0.817991	0.846045	0.864581	0.847361	0.8818	0.801867	0.783205	0.820529	0.821575	0.804191	0.838958	0.860413	0.838953	0.881873	0.786394	0.76226	0.810527	0.85811	0.843188	0.873032	0.885091	0.865449	0.904733	0.83294	0.813581	0.852299	0.787314	0.768971	0.805657	0.827036	0.803705	0.850368	0.751385	0.727463	0.775306
68	0.828468	0.814177	0.842759	0.861439	0.843842	0.879035	0.798194	0.779257	0.81713	0.818627	0.801168	0.836086	0.857917	0.836129	0.879705	0.783372	0.759225	0.807518	0.853806	0.83847	0.869142	0.881185	0.861001	0.901369	0.828508	0.808817	0.848199	0.784862	0.766341	0.803382	0.824983	0.801451	0.848515	0.748805	0.72466	0.77295
69	0.824264	0.809757	0.838771	0.857582	0.839653	0.875511	0.793949	0.774823	0.813076	0.814981	0.797436	0.832526	0.85466	0.832551	0.876769	0.779731	0.755599	0.803863	0.848883	0.833158	0.864608	0.876601	0.855909	0.897292	0.823541	0.803575	0.843506	0.781682	0.762967	0.800396	0.822142	0.798393	0.845891	0.745581	0.721238	0.769924
70	0.819424	0.804725	0.834123	0.853031	0.834796	0.871267	0.789152	0.769902	0.808402	0.810657	0.793008	0.828306	0.850665	0.828237	0.873093	0.775492	0.751396	0.799588	0.84336	0.827251	0.859469	0.871359	0.850178	0.892539	0.818054	0.797854	0.838254	0.777796	0.758868	0.796724	0.818538	0.794554	0.842521	0.741732	0.717213	0.766252
71	0.81397	0.799072	0.828867	0.847809	0.82927	0.866348	0.783819	0.764487	0.803151	0.805677	0.787892	0.823463	0.845954	0.823199	0.868709	0.770671	0.74662	0.794722	0.837256	0.820741	0.85377	0.865479	0.843809	0.887149	0.812065	0.791648	0.832482	0.773227	0.754054	0.792399	0.814194	0.789951	0.838436	0.737279	0.712595	0.761962
72	0.807919	0.792783	0.823056	0.841937	0.823071	0.860802	0.777967	0.758565	0.79737	0.800062	0.782087	0.818038	0.840551	0.817446	0.863656	0.765289	0.741275	0.789303	0.830589	0.813619	0.847559	0.858983	0.836801	0.881165	0.805589	0.784945	0.826233	0.767996	0.748532	0.78746	0.809134	0.784596	0.833672	0.732239	0.70739	0.757088
73	0.801294	0.785838	0.816749	0.835436	0.816191	0.854681	0.771614	0.752118	0.79111	0.793834	0.775589	0.812078	0.834479	0.810984	0.857975	0.759363	0.735356	0.783371	0.823378	0.805873	0.840884	0.851891	0.829152	0.874629	0.798643	0.777732	0.819554	0.762126	0.742302	0.781949	0.803383	0.778497	0.828268	0.726634	0.701598	0.75167
74	0.794112	0.778219	0.810006	0.828328	0.808621	0.848036	0.764777	0.745127	0.784428	0.787012	0.768393	0.805631	0.827762	0.803814	0.85171	0.752913	0.728855	0.776972	0.815643	0.797492	0.833794	0.844223	0.820859	0.867587	0.791243	0.769993	0.812492	0.755638	0.735364	0.775912	0.796963	0.77166	0.822266	0.720482	0.695213	0.74575
75	0.786395	0.769909	0.802882	0.820636	0.800354	0.840918	0.757473	0.737568	0.777379	0.779619	0.760492	0.798747	0.820421	0.795937	0.844905	0.745957	0.721761	0.770153	0.807401	0.788467	0.826335	0.836	0.811917	0.860082	0.783404	0.76171	0.805098	0.748555	0.727714	0.769396	0.789899	0.764089	0.81571	0.713803	0.688231	0.739374
76	0.778162	0.760896	0.795428	0.81238	0.791382	0.833378	0.74972	0.729418	0.770022	0.771676	0.751879	0.791473	0.812481	0.787354	0.837607	0.738514	0.714063	0.762966	0.798672	0.778795	0.818549	0.827242	0.802327	0.852158	0.775144	0.752868	0.797421	0.740899	0.719351	0.762446	0.782215	0.755787	0.808643	0.706616	0.680644	0.732589
77	0.769433	0.751178	0.787688	0.803582	0.781704	0.82546	0.741535	0.720659	0.762411	0.763204	0.742555	0.783852	0.803964	0.778068	0.829859	0.730603	0.705747	0.755459	0.789474	0.768476	0.810472	0.817971	0.792088	0.843853	0.766479	0.743455	0.789504	0.732691	0.710277	0.755106	0.773935	0.74676	0.801109	0.698942	0.672443	0.725441
78	0.760227	0.74076	0.779694	0.794264	0.771324	0.817204	0.732934	0.711275	0.754593	0.754223	0.732524	0.775922	0.794893	0.768084	0.821702	0.722242	0.696804	0.74768	0.779826	0.757517	0.802134	0.808206	0.781206	0.835206	0.757424	0.733462	0.781387	0.723955	0.700497	0.747413	0.765081	0.737014	0.793149	0.690799	0.663622	0.717976
79	0.750565	0.729658	0.771472	0.784448	0.760252	0.808643	0.723936	0.701263	0.74661	0.744756	0.721798	0.767713	0.785291	0.757408	0.813175	0.713451	0.687229	0.739672	0.769747	0.745933	0.79356	0.797969	0.76969	0.826247	0.747997	0.722889	0.773104	0.714711	0.69002	0.739402	0.75568	0.726559	0.784801	0.682207	0.654179	0.710235
80	0.740466	0.717895	0.763038	0.774155	0.748504	0.799806	0.714558	0.690625	0.738491	0.734823	0.710395	0.759251	0.775182	0.746052	0.804312	0.704247	0.677023	0.731472	0.759255	0.733741	0.784768	0.787279	0.757551	0.817006	0.738212	0.711743	0.764681	0.704982	0.678863	0.731101	0.745753	0.715407	0.776099	0.673185	0.644114	0.702256
81	0.729951	0.705498	0.754403	0.763407	0.7361	0.790713	0.704817	0.679377	0.730257	0.724445	0.698337	0.750554	0.764589	0.734034	0.795143	0.69465	0.666192	0.723108	0.748369	0.720965	0.775773	0.776157	0.744807	0.807507	0.728087	0.700036	0.756138	0.69479	0.667046	0.722534	0.735325	0.703576	0.767074	0.663754	0.633436	0.694072
82	0.719038	0.692501	0.745576	0.752225	0.723066	0.781384	0.69473	0.667538	0.721922	0.713645	0.685651	0.741638	0.753534	0.721373	0.785695	0.684678	0.654752	0.714605	0.737109	0.70763	0.766588	0.764624	0.731479	0.79777	0.717637	0.687787	0.747488	0.684157	0.654593	0.713721	0.72442	0.691087	0.757753	0.653932	0.622156	0.685708
83	0.707749	0.678934	0.736563	0.740632	0.709432	0.771832	0.684315	0.655136	0.713493	0.702442	0.67237	0.732513	0.742041	0.708092	0.77599	0.674351	0.642722	0.705979	0.725492	0.693763	0.75722	0.752701	0.717588	0.787814	0.70688	0.675019	0.738741	0.673105	0.641533	0.704677	0.713062	0.677964	0.748159	0.643739	0.610292	0.677187
84	0.696102	0.664833	0.727371	0.728648	0.695228	0.762069	0.673588	0.642202	0.704974	0.690857	0.658523	0.723192	0.730132	0.694218	0.766046	0.663686	0.63013	0.697242	0.713538	0.679394	0.747681	0.740408	0.703162	0.777654	0.69583	0.661758	0.729903	0.661656	0.627895	0.695418	0.701274	0.664234	0.738314	0.633195	0.597867	0.668524
85	0.684118	0.650231	0.718005	0.716297	0.680487	0.752106	0.662567	0.628768	0.696367	0.678914	0.644145	0.713682	0.717832	0.679781	0.755882	0.652703	0.617004	0.688401	0.701264	0.664552	0.737977	0.727765	0.688227	0.767303	0.684505	0.648031	0.720978	0.649832	0.613711	0.685954	0.689081	0.649927	0.728234	0.622319	0.584906	0.659733
86	0.671816	0.63516	0.708472	0.703598	0.665241	0.741955	0.65127	0.614867	0.687674	0.666631	0.629269	0.703993	0.705162	0.664812	0.745512	0.64142	0.603376	0.679464	0.688691	0.649265	0.728118	0.714793	0.672813	0.756774	0.67292	0.633869	0.711971	0.637656	0.599013	0.676298	0.676506	0.635074	0.717937	0.611131	0.571438	0.650825
87	0.659217	0.619654	0.698779	0.690575	0.649525	0.731624	0.639714	0.600534	0.678894	0.654031	0.613928	0.694134	0.692146	0.649342	0.734951	0.629856	0.589279	0.670433	0.675837	0.633564	0.71811	0.701513	0.656948	0.746079	0.661092	0.6193	0.702884	0.625149	0.583836	0.666462	0.663573	0.619708	0.707438	0.59965	0.557493	0.641807
88	0.646339	0.603744	0.688935	0.677248	0.63337	0.721125	0.627916	0.5858	0.670031	0.641134	0.598155	0.684114	0.678807	0.633403	0.724211	0.61803	0.574745	0.661314	0.66272	0.617477	0.707964	0.687946	0.640662	0.735229	0.649036	0.604353	0.69372	0.612333	0.56821	0.656456	0.650306	0.603862	0.696751	0.587896	0.543104	0.632688
89	0.633204	0.58746	0.678949	0.663639	0.61681	0.710468	0.615893	0.570698	0.661088	0.627963	0.581981	0.673945	0.665169	0.61703	0.713307	0.60596	0.55981	0.65211	0.64936	0.601032	0.697687	0.67411	0.623986	0.724235	0.63677	0.589057	0.684484	0.59923	0.552169	0.646291	0.636729	0.587569	0.685889	0.575888	0.528302	0.623473
90	0.619831	0.570832	0.668829	0.64977	0.599877	0.699664	0.603662	0.555257	0.652067	0.614537	0.56544	0.663635	0.651253	0.600255	0.702251	0.593666	0.544504	0.642827	0.635774	0.584259	0.68729	0.660029	0.606948	0.713109	0.62431	0.57344	0.675179	0.585863	0.535746	0.63598	0.622866	0.570863	0.674868	0.563646	0.51312	0.614171
91	0.606239	0.553891	0.658587	0.635663	0.582602	0.688725	0.591241	0.53951	0.642973	0.600879	0.548562	0.653196	0.637084	0.583111	0.691057	0.581165	0.528862	0.633468	0.621982	0.567184	0.676781	0.645721	0.58958	0.701862	0.61167	0.557531	0.66581	0.572253	0.518972	0.625534	0.60874	0.553779	0.663701	0.551189	0.497589	0.604788
92	0.592449	0.536665	0.648232	0.62134	0.565017	0.677662	0.578648	0.523484	0.633812	0.587009	0.531378	0.642639	0.622684	0.565632	0.679736	0.568477	0.512913	0.624041	0.608003	0.549835	0.666171	0.631207	0.57191	0.690505	0.598869	0.541356	0.656382	0.558423	0.50188	0.614965	0.594375	0.53635	0.652401	0.538536	0.481741	0.595331
93	0.57848	0.519184	0.637777	0.606821	0.547152	0.666489	0.565899	0.507208	0.62459	0.572948	0.513919	0.631977	0.608076	0.547849	0.668303	0.555621	0.496689	0.614552	0.593855	0.532239	0.655471	0.616509	0.553967	0.67905	0.585922	0.524942	0.646902	0.544394	0.484501	0.604287	0.579796	0.51861	0.640983	0.525708	0.465608	0.585809
94	0.564353	0.501474	0.627231	0.592129	0.529039	0.655218	0.553011	0.490709	0.615313	0.558718	0.496214	0.621222	0.593284	0.529796	0.656772	0.542614	0.480221	0.605008	0.579557	0.514424	0.64469	0.601646	0.535782	0.667509	0.572845	0.508315	0.637375	0.530189	0.466866	0.593512	0.565026	0.500591	0.629462	0.512724	0.449219	0.576229
95	0.550086	0.483565	0.616607	0.577285	0.510708	0.643861	0.540003	0.474016	0.60599	0.54434	0.478294	0.610385	0.57833	0.511504	0.645156	0.529477	0.463538	0.595416	0.565128	0.496415	0.63384	0.586639	0.517383	0.655895	0.559654	0.4915	0.627808	0.515829	0.449006	0.582653	0.550089	0.482328	0.617851	0.499604	0.432607	0.5666
96	0.535701	0.465483	0.605918	0.562311	0.492188	0.632433	0.526891	0.457155	0.596626	0.529835	0.460189	0.599481	0.563238	0.493007	0.63347	0.516227	0.446669	0.585786	0.550586	0.47824	0.622932	0.571509	0.498799	0.644219	0.546366	0.474524	0.618208	0.501338	0.430951	0.571725	0.535009	0.463852	0.606167	0.486366	0.4158	0.556932
97	0.521216	0.447257	0.595174	0.547229	0.47351	0.620947	0.513692	0.440152	0.587232	0.515224	0.441926	0.588521	0.548031	0.474334	0.621728	0.502884	0.429642	0.576126	0.53595	0.459924	0.611977	0.556276	0.480058	0.632494	0.532997	0.457411	0.608583	0.486736	0.412732	0.56074	0.51981	0.445197	0.594423	0.47303	0.398827	0.547233
98	0.506652	0.428914	0.584389	0.53206	0.454702	0.609417	0.500424	0.423034	0.577815	0.500528	0.423536	0.57752	0.532731	0.455518	0.609944	0.489465	0.412486	0.566444	0.52124	0.441493	0.600986	0.540961	0.461188	0.620733	0.519563	0.440186	0.598941	0.472045	0.394379	0.549712	0.504515	0.426395	0.582636	0.459617	0.38172	0.537514
99	0.492028	0.41048	0.573575	0.516826	0.435795	0.597857	0.487105	0.405825	0.568384	0.485769	0.405046	0.566491	0.517362	0.43659	0.598134	0.475991	0.39523	0.556752	0.506473	0.422974	0.589971	0.525584	0.442219	0.608949	0.506081	0.422873	0.589289	0.457289	0.375922	0.538657	0.489149	0.407477	0.57082	0.446145	0.364505	0.527784
100	0.477364	0.391984	0.562745	0.501549	0.416816	0.586281	0.473751	0.388553	0.558948	0.470967	0.386487	0.555448	0.501947	0.417581	0.586313	0.462479	0.377899	0.547058	0.491669	0.404393	0.578944	0.510166	0.423176	0.597155	0.492566	0.405497	0.579635	0.442489	0.35739	0.527587	0.473734	0.388476	0.558993	0.432634	0.347212	0.518055
